# Supplementary material for: Redox regulation of PTPN22 affects the severity of T-cell-dependent autoimmune inflammation
Source: eLife. 2022 May 19;11:e74549. doi: 10.7554/eLife.74549 (PMC9119677; doi:10.7554/eLife.74549)
Supplement: Figure 3—source data 1. [file elife-74549-fig3-data1.xlsx]

## Sheet: Sheet1
pinna thickness -Figure 3B	BQ								PTPN22 C129S
0	0.00	0.00	0.00	0.00	0.00	0.00	0.00	0.00	0.00	0.00	0.00	0.00	0.00	0.00
24h	0.04	0.04	0.01	0.09	0.01	0.11	0.06	0.04	0.10	0.11	0.15	0.15	0.04	0.08
48h	0.02	0.22	0.04	0.18	0.02	0.22	0.16	0.02	0.16	0.16	0.21	0.28	0.15	0.20
72h	0.13	0.10	0.04	0.22	0.07	0.26	0.17	0.13	0.19	0.25	0.27	0.36	0.20	0.25
pinna thickness -Figure 3C	NCF1m1j					PTPN22/NCF1
0	0.00	0.00	0.00	0.00	0.00	0.00	0.00	0.00	0.00	0.00	0.00	0.00
24h	0.06	0.05	0.04	0.06	0.20	0.13	0.19	0.11	0.06	0.02	0.16	0.08
48h	0.15	0.24	0.18	0.07	0.25	0.27	0.17	0.20	0.11	0.00	0.26	0.13
72h	0.24	0.24	0.24	0.16	0.30	0.38	0.29	0.17	0.09	0.02	0.30	0.17
