# Supplementary material for: Redox regulation of PTPN22 affects the severity of T-cell-dependent autoimmune inflammation
Source: eLife. 2022 May 19;11:e74549. doi: 10.7554/eLife.74549 (PMC9119677; doi:10.7554/eLife.74549)
Supplement: Figure 6—source data 5. [file elife-74549-fig6-data5.xlsx]

## Sheet: proteinGroups
Protein IDs	Majority protein IDs	Protein names	Gene names	Fasta headers	Peptides	Sequence coverage [%]	Number of 0s	Reporter intensity corrected 0 J	Reporter intensity corrected 1 J	Reporter intensity corrected 2 J	Reporter intensity corrected 3 J	Reporter intensity corrected 4 J	Reporter intensity corrected 5 J	Reporter intensity corrected 6 J	Reporter intensity corrected 7 J	Reporter intensity corrected 8 J	Reporter intensity corrected 9 J	Reporter intensity corrected 10 J	Reporter intensity corrected 11 J	Reporter intensity corrected 12 J	Reporter intensity corrected 13 J	Reporter intensity corrected 14 J	Reporter intensity corrected 15 J
E9Q3R6	E9Q3R6		Zfp169	tr|E9Q3R6|E9Q3R6_MOUSE Protein Zfp169 OS=Mus musculus GN=Zfp169 PE=4 SV=1	1	4.1	3	2955.7	2699.4	12165	2770.2	7626.1	0	4128.8	5376.6	9722.8	7726.4	0	4498.6	9785.8	0	8825.3	8397.6
A0A075B5W1;A0A0A6YXE0	A0A075B5W1;A0A0A6YXE0		Ighv1-50;Ighv1-59	tr|A0A075B5W1|A0A075B5W1_MOUSE Protein Ighv1-50 (Fragment) OS=Mus musculus GN=Ighv1-50 PE=4 SV=1;tr|A0A0A6YXE0|A0A0A6YXE0_MOUSE Protein Ighv1-59 (Fragment) OS=Mus musculus GN=Ighv1-59 PE=4 SV=1	2	47.9	3	0	0	8766.9	2592.3	8180.4	12102	7361.4	9050.5	5454.3	5542.3	14365	0	7902.2	24160	8538.6	16359
Q8CHZ9;B9EJ57	Q8CHZ9;B9EJ57	Transcription termination factor 1a, mitochondrial;Transcription termination factor 1b, mitochondrial	Mterf1a;Mterf1b	sp|Q8CHZ9|MTF1A_MOUSE Transcription termination factor 1a, mitochondrial OS=Mus musculus GN=Mterf1a PE=2 SV=1;sp|B9EJ57|MTF1B_MOUSE Transcription termination factor 1b, mitochondrial OS=Mus musculus GN=Mterf1b PE=2 SV=1	3	9	3	10495	4844.3	3321.5	9471.7	3732.8	0	0	8416.5	9490.3	3738.8	0	9958.9	4928.6	5555.3	4593.2	3301.5
A0A075B5L1	A0A075B5L1		Igkv10-94	tr|A0A075B5L1|A0A075B5L1_MOUSE Protein Igkv10-94 OS=Mus musculus GN=Igkv10-94 PE=4 SV=3	1	27.8	2	4263.2	3219.5	6712.7	6674.7	2833.7	16797	13287	2645.6	0	0	4254.3	5364.1	9205.7	41916	7453.3	13029
Q64277	Q64277	ADP-ribosyl cyclase/cyclic ADP-ribose hydrolase 2	Bst1	sp|Q64277|BST1_MOUSE ADP-ribosyl cyclase/cyclic ADP-ribose hydrolase 2 OS=Mus musculus GN=Bst1 PE=1 SV=1	1	5.8	2	5353.9	9536.2	3119	9806.1	5224.5	13185	12136	7313.1	9392.7	5191.7	7508.3	0	0	10879	9735.8	12129
Q8BKX7	Q8BKX7	Zinc finger protein 410	Znf410	sp|Q8BKX7|ZN410_MOUSE Zinc finger protein 410 OS=Mus musculus GN=Znf410 PE=2 SV=2	1	5.6	2	10535	11882	29169	2745.7	21440	0	23039	5232.9	0	12923	8012.8	8545.7	9138.3	11362	6054.9	4025.2
Q8VDU0	Q8VDU0	G-protein-signaling modulator 2	Gpsm2	sp|Q8VDU0|GPSM2_MOUSE G-protein-signaling modulator 2 OS=Mus musculus GN=Gpsm2 PE=1 SV=2	2	5.6	2	7025.4	9137.4	9754.5	2335.3	4053.5	9693.3	6462.5	6833.9	11721	5242.6	7401.2	0	0	6320.6	7734.4	5200.6
Q9QYH9	Q9QYH9	Tumor necrosis factor ligand superfamily member 14;Tumor necrosis factor ligand superfamily member 14, membrane form;Tumor necrosis factor ligand superfamily member 14, soluble form	Tnfsf14	sp|Q9QYH9|TNF14_MOUSE Tumor necrosis factor ligand superfamily member 14 OS=Mus musculus GN=Tnfsf14 PE=2 SV=1	2	19.2	2	4946.9	7844.3	8766.1	4414.9	10801	0	7911.9	4730	10031	6183	0	5141.4	7683.7	5640	9986.1	5210.4
Q811J3	Q811J3	Iron-responsive element-binding protein 2	Ireb2	sp|Q811J3|IREB2_MOUSE Iron-responsive element-binding protein 2 OS=Mus musculus GN=Ireb2 PE=2 SV=2	3	4.7	2	0	8528.8	15391	3075.5	2437.5	11910	15642	0	5772.9	8608.6	11757	13955	15345	12195	18437	12405
Q6ZPS6	Q6ZPS6	Ankyrin repeat and IBR domain-containing protein 1	Ankib1	sp|Q6ZPS6|AKIB1_MOUSE Ankyrin repeat and IBR domain-containing protein 1 OS=Mus musculus GN=Ankib1 PE=1 SV=2	4	5.3	2	8279.5	7468.7	4748.6	4804	8356	4352.3	11027	5290.9	4749.8	8582.8	2248.8	0	6587.3	10704	8320.3	0
G5E872	G5E872		Rnpepl1	tr|G5E872|G5E872_MOUSE Protein Rnpepl1 OS=Mus musculus GN=Rnpepl1 PE=4 SV=2	1	5.7	1	16080	10129	19083	2638.8	12821	3590.4	8929.1	11760	15580	19236	6565.4	0	21522	3189.6	16121	16214
P17950	P17950	Immediate early response gene 2 protein	Ier2	sp|P17950|IER2_MOUSE Immediate early response gene 2 protein OS=Mus musculus GN=Ier2 PE=2 SV=3	1	12.7	1	12125	9385.3	10205	0	2992.9	5311.9	7239.4	3049.7	5475.7	9872.2	4664.3	2423	8811.3	2470.3	9456	10911
Q3U034	Q3U034	Methyltransferase-like protein 4	Mettl4	sp|Q3U034|METL4_MOUSE Methyltransferase-like protein 4 OS=Mus musculus GN=Mettl4 PE=2 SV=1	1	5.3	1	16653	10300	9626.4	2281.6	11140	0	15183	10507	18115	10094	9430.2	8742.9	11800	13786	19871	15028
Q3UD82	Q3UD82	Poly [ADP-ribose] polymerase 8	Parp8	sp|Q3UD82|PARP8_MOUSE Poly [ADP-ribose] polymerase 8 OS=Mus musculus GN=Parp8 PE=2 SV=1	1	2.8	1	9789	7178.6	11982	2691.8	6485.4	6117.4	13661	12072	5677.7	10174	5801.6	0	10479	6959.9	8019.9	7638.4
Q62415	Q62415	Apoptosis-stimulating of p53 protein 1	Ppp1r13b	sp|Q62415|ASPP1_MOUSE Apoptosis-stimulating of p53 protein 1 OS=Mus musculus GN=Ppp1r13b PE=2 SV=2	1	1.3	1	11910	7534.5	11597	8770.6	9360	7834.8	10927	10081	11033	2643.6	8378.3	0	10543	12752	13662	10269
Q6SJQ0	Q6SJQ0	CMRF35-like molecule 8	Cd300a	sp|Q6SJQ0|CLM8_MOUSE CMRF35-like molecule 8 OS=Mus musculus GN=Cd300a PE=1 SV=2	1	5.3	1	0	8433.2	13454	8698.7	5373.2	24986	18066	14184	9122	8262.4	10439	17003	12448	23765	17839	16849
Q6ZQ11	Q6ZQ11	Chondroitin sulfate synthase 1	Chsy1	sp|Q6ZQ11|CHSS1_MOUSE Chondroitin sulfate synthase 1 OS=Mus musculus GN=Chsy1 PE=2 SV=2	1	2.6	1	8068.6	7528.7	11930	0	2744.6	6976.3	9697.4	9619.5	6752.4	4377.9	8778.7	10692	7297.5	6418.8	8725.4	7107.3
Q812G0	Q812G0	Alpha-1,3-mannosyl-glycoprotein 4-beta-N-acetylglucosaminyltransferase A;Alpha-1,3-mannosyl-glycoprotein 4-beta-N-acetylglucosaminyltransferase A soluble form	Mgat4a	sp|Q812G0|MGT4A_MOUSE Alpha-1,3-mannosyl-glycoprotein 4-beta-N-acetylglucosaminyltransferase A OS=Mus musculus GN=Mgat4a PE=2 SV=1	1	3.9	1	8558.1	8905.1	16054	4516.1	8254.6	12658	15744	6736.6	11767	0	8339.2	2929.2	8427.2	9199.4	16700	4937.4
Q99JY1	Q99JY1	Toll/interleukin-1 receptor domain-containing adapter protein	Tirap	sp|Q99JY1|TIRAP_MOUSE Toll/interleukin-1 receptor domain-containing adapter protein OS=Mus musculus GN=Tirap PE=1 SV=1	1	7.5	1	5112.8	10326	11040	9341.9	6402.9	8796.8	14959	10511	8500	13579	8718.9	0	9414.3	8250.2	13637	8811.1
Q9JHQ0	Q9JHQ0	Annexin A9	Anxa9	sp|Q9JHQ0|ANXA9_MOUSE Annexin A9 OS=Mus musculus GN=Anxa9 PE=2 SV=2	1	5.5	1	8058.8	4709.1	11680	9037.1	2957.9	6026	5770	0	9138.4	5479.2	3643	3327.1	5160.1	11598	9932.3	11060
Q02780	Q02780	Nuclear factor 1 A-type	Nfia	sp|Q02780|NFIA_MOUSE Nuclear factor 1 A-type OS=Mus musculus GN=Nfia PE=1 SV=1	2	9.4	1	8693.7	7238.6	13492	3476	13680	8335.2	12014	7116.4	8301.9	9487.5	4567	0	13807	11281	7791.2	8612.3
Q8BZS9	Q8BZS9	Putative pre-mRNA-splicing factor ATP-dependent RNA helicase DHX32	Dhx32	sp|Q8BZS9|DHX32_MOUSE Putative pre-mRNA-splicing factor ATP-dependent RNA helicase DHX32 OS=Mus musculus GN=Dhx32 PE=2 SV=2	2	5.5	1	6519.2	4962.5	8847.6	3559.3	6644.7	8164.3	5800.8	4361.9	9442.8	0	4490.8	4462.5	5144.9	9021.2	5609.2	8772.2
Q8C7B8	Q8C7B8	Zinc finger SWIM domain-containing protein 4	Zswim4	sp|Q8C7B8|ZSWM4_MOUSE Zinc finger SWIM domain-containing protein 4 OS=Mus musculus GN=Zswim4 PE=2 SV=2	2	3.6	1	12353	10708	10107	0	7944.8	8375.5	8255.8	4418.8	3833.5	4988.8	7411.1	5162.5	11430	3156.3	8647.1	9680.1
Q99MD6	Q99MD6	Thioredoxin reductase 3	Txnrd3	sp|Q99MD6|TRXR3_MOUSE Thioredoxin reductase 3 OS=Mus musculus GN=Txnrd3 PE=1 SV=3	2	6.3	1	15099	22236	17090	14035	15379	13254	19255	13612	4734.9	16371	11708	0	17622	12400	14433	22038
Q9JIM3	Q9JIM3	DNA excision repair protein ERCC-6-like 2	Ercc6l2	sp|Q9JIM3|ER6L2_MOUSE DNA excision repair protein ERCC-6-like 2 OS=Mus musculus GN=Ercc6l2 PE=2 SV=3	2	2.6	1	3463	0	9274.9	5102.6	6080.5	2990.1	7902.7	5531.7	2855.8	3031.7	3372.8	6944.4	5177.5	5168.1	5561.7	3142
Q9R0E2	Q9R0E2	Procollagen-lysine,2-oxoglutarate 5-dioxygenase 1	Plod1	sp|Q9R0E2|PLOD1_MOUSE Procollagen-lysine,2-oxoglutarate 5-dioxygenase 1 OS=Mus musculus GN=Plod1 PE=1 SV=1	3	4.9	1	6562.5	0	13396	17130	7842.9	12532	10902	12425	9731.5	7504.1	13663	16963	15648	13386	11993	13235
P21440	P21440	Multidrug resistance protein 3	Abcb4	sp|P21440|MDR3_MOUSE Multidrug resistance protein 3 OS=Mus musculus GN=Abcb4 PE=2 SV=2	6	6.8	1	11954	0	5940.9	7359.2	9945.2	11100	10183	10821	5532.2	3451.1	3101	7397.9	4871.3	9452.5	9101.9	7019.4
P04104	P04104	Keratin, type II cytoskeletal 1	Krt1	sp|P04104|K2C1_MOUSE Keratin, type II cytoskeletal 1 OS=Mus musculus GN=Krt1 PE=1 SV=4	8	8	1	0	3980.8	96401	8093.9	9569.4	11516	13416	12942	6222.7	4499	6784.3	2961	10704	8988.8	25731	6694.4
Q80XI6	Q80XI6	Mitogen-activated protein kinase kinase kinase 11	Map3k11	sp|Q80XI6|M3K11_MOUSE Mitogen-activated protein kinase kinase kinase 11 OS=Mus musculus GN=Map3k11 PE=1 SV=1	1	3.4	0	15102	7359.3	5690.1	2412.4	6433	4563.3	2469.9	4341	4881.5	7079.9	3437.5	5570.3	9695.8	3901.2	12620	4147.8
Q7TSA6	Q7TSA6	Proline and serine-rich protein 3	Proser3	sp|Q7TSA6|PRSR3_MOUSE Proline and serine-rich protein 3 OS=Mus musculus GN=Proser3 PE=2 SV=1	1	4.9	0	7596.6	3983.8	11063	4689.2	8745.3	6771.7	6039.7	9185.2	5315.2	6434.4	8231	3320.7	4765	8217	11964	5783.6
Q9CYB0	Q9CYB0	E3 ubiquitin-protein ligase TRIM13	Trim13	sp|Q9CYB0|TRI13_MOUSE E3 ubiquitin-protein ligase TRIM13 OS=Mus musculus GN=Trim13 PE=2 SV=1	2	8.1	0	6177.2	12395	16287	3862.1	5590.3	8027.1	9055.5	6857.2	4532.7	5809.4	10307	2722	8781.7	2927.8	11237	8558.4
Q8BH73	Q8BH73	Glutaminyl-peptide cyclotransferase-like protein	Qpctl	sp|Q8BH73|QPCTL_MOUSE Glutaminyl-peptide cyclotransferase-like protein OS=Mus musculus GN=Qpctl PE=2 SV=1	2	11	0	12204	11307	10176	9857.7	10560	2439.7	5622.8	9241.1	13537	2220.6	8047.8	8009.1	8125.8	2245.6	10428	9230.4
Q8BG28	Q8BG28	UDP-GalNAc:beta-1,3-N-acetylgalactosaminyltransferase 2	B3galnt2	sp|Q8BG28|B3GL2_MOUSE UDP-GalNAc:beta-1,3-N-acetylgalactosaminyltransferase 2 OS=Mus musculus GN=B3galnt2 PE=1 SV=1	1	3	0	13290	7589.6	8281	10400	8465.1	7739.7	9218.7	3444.9	9916.1	4561.4	6926.4	7662	2559.5	9420.1	17975	14794
Q8C8K6	Q8C8K6		Atxn7l2	tr|Q8C8K6|Q8C8K6_MOUSE Ataxin 7-like 2 OS=Mus musculus GN=Atxn7l2 PE=2 SV=1	3	5.6	0	8918.4	9967	11158	4492.1	4576.9	7687.6	10390	10658	10721	6297.8	4768.2	8215.8	13053	6958.6	11102	9416.6
P10810	P10810	Monocyte differentiation antigen CD14	Cd14	sp|P10810|CD14_MOUSE Monocyte differentiation antigen CD14 OS=Mus musculus GN=Cd14 PE=1 SV=1	1	5.2	0	5128.5	8568.2	12716	5689.8	8916.6	7638	9395.3	5877.3	8553.8	6446.9	9142.6	7643.5	12476	8005.4	12473	12635
Q14DQ1	Q14DQ1	Protein FAM219B	Fam219b	sp|Q14DQ1|F219B_MOUSE Protein FAM219B OS=Mus musculus GN=Fam219b PE=2 SV=1	2	24.9	0	10877	10008	14856	3079	5245.7	5493.1	10107	9660.3	15645	7222	11424	9676.1	10440	9314.5	10802	10670
Q80XS6	Q80XS6	Protein Smaug homolog 2	Samd4b	sp|Q80XS6|SMAG2_MOUSE Protein Smaug homolog 2 OS=Mus musculus GN=Samd4b PE=2 SV=1	2	7.3	0	8558.1	12654	11801	10208	6134.1	5956.9	10428	10614	9857.2	8306.7	5930.1	7661.8	12201	8247	10931	9097.8
E9PXJ7;Q78S06	E9PXJ7;Q78S06	Protein SYS1 homolog	Gm20458;Sys1	tr|E9PXJ7|E9PXJ7_MOUSE Protein Gm20458 OS=Mus musculus GN=Gm20458 PE=4 SV=1;sp|Q78S06|SYS1_MOUSE Protein SYS1 homolog OS=Mus musculus GN=Sys1 PE=2 SV=1	1	28.2	0	11759	3943.8	16758	7989.7	9192.3	14932	3529.2	7299.7	11913	9075.4	8877.7	10144	10341	12009	9902.7	7590
Q9WV35	Q9WV35	Probable C->U-editing enzyme APOBEC-2	Apobec2	sp|Q9WV35|ABEC2_MOUSE Probable C->U-editing enzyme APOBEC-2 OS=Mus musculus GN=Apobec2 PE=1 SV=1	1	11.2	0	12465	12792	17239	6519	7914.2	7102	16513	10571	10702	9943.7	5282.5	5882.9	13995	4661.3	10968	5024.1
Q6P1E7	Q6P1E7	DNA-directed primase/polymerase protein	Primpol	sp|Q6P1E7|PRIPO_MOUSE DNA-directed primase/polymerase protein OS=Mus musculus GN=Primpol PE=2 SV=1	1	3.4	0	9706.6	13848	15222	6098.3	10267	10483	11160	8921.6	4381.3	8466.2	8849	6833.4	10949	6662.3	18036	7700.6
Q8CBY0	Q8CBY0	Glutamyl-tRNA(Gln) amidotransferase subunit C, mitochondrial	Gatc	sp|Q8CBY0|GATC_MOUSE Glutamyl-tRNA(Gln) amidotransferase subunit C, mitochondrial OS=Mus musculus GN=Gatc PE=2 SV=1	1	16.8	0	18528	11072	13570	12818	8345.8	9167.6	10111	6359.1	3953.3	10080	8650.1	7221	10391	6797.9	12280	9895
A6X935	A6X935	Inter alpha-trypsin inhibitor, heavy chain 4	Itih4	sp|A6X935|ITIH4_MOUSE Inter alpha-trypsin inhibitor, heavy chain 4 OS=Mus musculus GN=Itih4 PE=1 SV=2	3	3.9	0	4006.1	7615.8	11724	8899.6	11442	18256	11271	11715	8796.9	2491.3	8919.7	10122	11270	14494	13133	10702
Q6PZE0	Q6PZE0	Mucin-19	Muc19	sp|Q6PZE0|MUC19_MOUSE Mucin-19 OS=Mus musculus GN=Muc19 PE=2 SV=2	1	10.5	0	10517	6491.5	106730	5645.2	1998.9	5062.6	8419	9153.4	6882.5	8356.3	126600	6535.3	9845.2	2808.8	12010	11687
Q8K3E5	Q8K3E5	Jouberin	Ahi1	sp|Q8K3E5|AHI1_MOUSE Jouberin OS=Mus musculus GN=Ahi1 PE=1 SV=2	1	1.6	0	11544	14657	16631	1840.1	8502	7633.7	14166	9435.6	12088	10679	6234.7	11619	10814	9690.9	14471	10979
Q9Z2Q6	Q9Z2Q6	Septin-5	2020-09-05	sp|Q9Z2Q6|SEPT5_MOUSE Septin-5 OS=Mus musculus GN=Sept5 PE=1 SV=2	4	13.8	0	7004.4	7137.9	19810	10418	12798	11686	13891	10986	10252	10994	2606.3	8780.1	13422	8476.2	12297	10649
Q9JLY0	Q9JLY0	Suppressor of cytokine signaling 6	Socs6	sp|Q9JLY0|SOCS6_MOUSE Suppressor of cytokine signaling 6 OS=Mus musculus GN=Socs6 PE=1 SV=2	1	3.9	0	9195.5	12564	10068	5927.8	13685	10002	17613	11841	6932.9	2748.1	9033.9	7207.4	16421	9334.1	12964	19497
Q64693	Q64693	POU domain class 2-associating factor 1	Pou2af1	sp|Q64693|OBF1_MOUSE POU domain class 2-associating factor 1 OS=Mus musculus GN=Pou2af1 PE=1 SV=2	1	8.6	0	5670.8	12773	14310	4572.3	13418	9540	7368	9437.1	18984	6308.2	8954.3	10367	17925	14462	8922	12519
Q6NZK5	Q6NZK5	Uncharacterized protein KIAA1328	Kiaa1328	sp|Q6NZK5|K1328_MOUSE Uncharacterized protein KIAA1328 OS=Mus musculus GN=Kiaa1328 PE=2 SV=2	1	2.6	0	8235.9	9296.8	16769	8248.1	14351	9407.2	8414	8327.8	12166	12659	5917.2	7280.9	10350	7434.5	14109	20827
Q4PZA2	Q4PZA2	Endothelin-converting enzyme 1	Ece1	sp|Q4PZA2|ECE1_MOUSE Endothelin-converting enzyme 1 OS=Mus musculus GN=Ece1 PE=1 SV=1	4	4.7	0	12264	12968	13893	6838	10520	11311	11106	10682	13031	10494	11762	4878.3	8905.3	9692.8	11199	9452.3
Q9CPV1	Q9CPV1	Spindle and kinetochore-associated protein 1	Ska1	sp|Q9CPV1|SKA1_MOUSE Spindle and kinetochore-associated protein 1 OS=Mus musculus GN=Ska1 PE=2 SV=2	1	5.5	0	7165.5	12773	12612	13575	7144.7	16826	12636	9274.2	9733.3	2961.2	12161	9601.3	8038.6	21358	11440	10991
P70232	P70232	Neural cell adhesion molecule L1-like protein;Processed neural cell adhesion molecule L1-like protein	Chl1	sp|P70232|NCHL1_MOUSE Neural cell adhesion molecule L1-like protein OS=Mus musculus GN=Chl1 PE=1 SV=2	1	1.1	0	14325	8062.5	14255	7283.2	4312.4	6426.3	18328	16991	15140	15603	3730.8	10667	14107	5082.2	18754	12797
Q8VIK5	Q8VIK5	Platelet endothelial aggregation receptor 1	Pear1	sp|Q8VIK5|PEAR1_MOUSE Platelet endothelial aggregation receptor 1 OS=Mus musculus GN=Pear1 PE=1 SV=1	1	2.4	0	12117	9968.3	9625.6	10607	10398	10777	17760	11997	12949	7577.4	11229	6972.6	11606	12899	14124	3690
Q9QZF2	Q9QZF2	Glypican-1;Secreted glypican-1	Gpc1	sp|Q9QZF2|GPC1_MOUSE Glypican-1 OS=Mus musculus GN=Gpc1 PE=1 SV=1	2	7.7	0	12616	12442	15303	5228.7	10195	14220	8071.7	13339	9009	8740.9	9219.3	8277.3	12954	10157	9611.5	12775
Q8CIV2	Q8CIV2	Membralin	Tmem259	sp|Q8CIV2|MBRL_MOUSE Membralin OS=Mus musculus GN=Tmem259 PE=1 SV=2	2	6.8	0	9445.3	7176.3	16724	12028	9540.8	13234	9303.5	8571.7	8082.2	9074.2	9683.6	9609.9	12751	6281.8	18380	17007
Q7TSI0	Q7TSI0	Zinc finger protein 12	Znf12	sp|Q7TSI0|ZNF12_MOUSE Zinc finger protein 12 OS=Mus musculus GN=Znf12 PE=2 SV=1	3	7.4	0	13612	10357	16338	9510.2	15595	2036.1	14041	20377	7668.8	15269	9409.7	4583.7	9965.1	10127	15800	15179
P51678	P51678	Probable C-C chemokine receptor type 3	Ccr3	sp|P51678|CCR3_MOUSE Probable C-C chemokine receptor type 3 OS=Mus musculus GN=Ccr3 PE=2 SV=2	1	4.7	0	10339	16383	15347	8267.5	7498.9	9378.2	12316	13146	9566.8	9231.2	11797	3994.1	8996.8	12432	20756	11367
Q8CDD8	Q8CDD8	BTB/POZ domain-containing protein KCTD20	Kctd20	sp|Q8CDD8|KCD20_MOUSE BTB/POZ domain-containing protein KCTD20 OS=Mus musculus GN=Kctd20 PE=1 SV=1	1	3.6	0	10365	8899.1	20828	9902.3	8037	14641	8260.1	11309	8364.9	9299.1	8680	16179	10605	8009.6	11655	12037
Q9D7J9	Q9D7J9	Enoyl-CoA hydratase domain-containing protein 3, mitochondrial	Echdc3	sp|Q9D7J9|ECHD3_MOUSE Enoyl-CoA hydratase domain-containing protein 3, mitochondrial OS=Mus musculus GN=Echdc3 PE=1 SV=1	1	6.3	0	4958.2	25110	11206	6664.8	15958	10852	11904	11454	10464	10078	8728.2	9612	14619	11499	14763	8576.6
Q9Z1A9	Q9Z1A9	TBC1 domain family member 8	Tbc1d8	sp|Q9Z1A9|TBCD8_MOUSE TBC1 domain family member 8 OS=Mus musculus GN=Tbc1d8 PE=2 SV=2	1	1.9	0	14053	10208	9317.7	11354	7331.4	17416	15870	10456	10301	6953.6	7191.3	7984.6	8235.9	17680	17203	13612
Q562D6	Q562D6	Nef-associated protein 1	Nap1	sp|Q562D6|NAP1_MOUSE Nef-associated protein 1 OS=Mus musculus GN=Nap1 PE=2 SV=2	1	4.6	0	10516	8073.5	17081	12678	17135	10494	13164	10039	6802.9	12407	8395.6	10947	11336	12193	13736	8109
Q8CE24	Q8CE24		Pramef8	tr|Q8CE24|Q8CE24_MOUSE 4732496O08Rik protein OS=Mus musculus GN=Pramef8 PE=2 SV=1	1	3.1	0	13144	22605	17868	4456.3	9731.6	8089.4	14836	11634	10303	13424	8307.1	6732.6	7947.3	15748	14672	16754
P25119	P25119	Tumor necrosis factor receptor superfamily member 1B	Tnfrsf1b	sp|P25119|TNR1B_MOUSE Tumor necrosis factor receptor superfamily member 1B OS=Mus musculus GN=Tnfrsf1b PE=2 SV=1	1	4.6	0	12311	10613	16925	3419.5	9043.9	10822	14497	12380	13963	14366	12948	3816.9	15772	14213	20880	16304
P46735	P46735	Unconventional myosin-Ib	Myo1b	sp|P46735|MYO1B_MOUSE Unconventional myosin-Ib OS=Mus musculus GN=Myo1b PE=2 SV=3	2	2.1	0	15644	14141	12915	8831.3	14789	14994	20830	13244	7060.6	8861.6	8252.9	6808.4	14999	8281	16832	10670
Q9D2Z4	Q9D2Z4	Sentrin-specific protease 8	Senp8	sp|Q9D2Z4|SENP8_MOUSE Sentrin-specific protease 8 OS=Mus musculus GN=Senp8 PE=1 SV=2	2	16.7	0	24813	23485	21619	3678.9	13667	4983.6	9854.6	14345	11285	10457	10565	8542.9	13655	9511.4	15973	12996
Q9CZP0	Q9CZP0	Ufm1-specific protease 1	Ufsp1	sp|Q9CZP0|UFSP1_MOUSE Ufm1-specific protease 1 OS=Mus musculus GN=Ufsp1 PE=1 SV=1	1	5.5	0	16781	21846	16242	8701.8	12006	13341	15942	10386	9426.4	11035	12026	6408.8	9714.5	9388.3	16399	12394
Q61096	Q61096	Myeloblastin	Prtn3	sp|Q61096|PRTN3_MOUSE Myeloblastin OS=Mus musculus GN=Prtn3 PE=2 SV=2	2	15.7	0	9634	13743	12204	10226	9580.9	24368	11881	12266	12736	12085	6167.3	10927	7924.1	23469	13878	15371
Q80U04	Q80U04	E3 ubiquitin-protein ligase Praja-2	Pja2	sp|Q80U04|PJA2_MOUSE E3 ubiquitin-protein ligase Praja-2 OS=Mus musculus GN=Pja2 PE=1 SV=2	1	3.3	0	12299	9977.9	16945	8147.4	10210	12690	19340	14749	14611	18586	10538	5533.7	14389	10023	13457	15759
Q9JIZ5	Q9JIZ5		Tfap4	tr|Q9JIZ5|Q9JIZ5_MOUSE Activator protein 4 OS=Mus musculus GN=Tfap4 PE=1 SV=1	2	8.6	0	14585	9666.9	23815	8597.9	14820	16033	14800	10823	11804	13942	11654	3940.1	17545	10095	17961	12308
A0JNT9	A0JNT9	Bicaudal D-related protein 1	Ccdc64	sp|A0JNT9|BICR1_MOUSE Bicaudal D-related protein 1 OS=Mus musculus GN=Ccdc64 PE=1 SV=1	2	5.2	0	22024	17811	17915	10140	11923	9755.2	10664	12894	17695	15295	6127.8	7688.9	14431	9054.2	18491	9310.9
Q8K2W6	Q8K2W6	PHD finger protein 13	Phf13	sp|Q8K2W6|PHF13_MOUSE PHD finger protein 13 OS=Mus musculus GN=Phf13 PE=2 SV=2	1	10.8	0	24776	14836	20995	2533.2	10759	7416.1	22389	15966	8173.4	16064	8218.1	5981	20900	12603	22341	17554
Q6P3A9	Q6P3A9	ADP-ribosylation factor-like protein 11	Arl11	sp|Q6P3A9|ARL11_MOUSE ADP-ribosylation factor-like protein 11 OS=Mus musculus GN=Arl11 PE=2 SV=1	2	18.2	0	14381	13455	15723	10580	12286	12953	11045	8563.8	20404	14745	9424.8	4956.4	12758	12111	19249	20811
Q8CAB8;Q9CWQ8	Q8CAB8;Q9CWQ8	GATS-like protein 2;GATS-like protein 3	Gatsl2;Gatsl3	sp|Q8CAB8|GATL2_MOUSE GATS-like protein 2 OS=Mus musculus GN=Gatsl2 PE=2 SV=1;sp|Q9CWQ8|GATL3_MOUSE GATS-like protein 3 OS=Mus musculus GN=Gatsl3 PE=2 SV=1	1	2.7	0	14560	13820	15105	13327	17221	12488	9992.9	17426	14922	11173	7885.5	9082.8	10445	11241	15609	13177
Q8BJL1	Q8BJL1	F-box only protein 30	Fbxo30	sp|Q8BJL1|FBX30_MOUSE F-box only protein 30 OS=Mus musculus GN=Fbxo30 PE=1 SV=2	2	4.3	0	10813	17800	32559	13587	16504	17971	17788	8767.8	10787	13070	14030	2529.7	13921	9654.5	16373	10440
Q8CIK8	Q8CIK8	E3 ubiquitin-protein ligase RFWD3	Rfwd3	sp|Q8CIK8|RFWD3_MOUSE E3 ubiquitin-protein ligase RFWD3 OS=Mus musculus GN=Rfwd3 PE=2 SV=1	1	3.2	0	9519.6	17867	16054	11662	10083	9601.6	16745	11881	12627	10728	8142	10750	16091	22713	12592	14915
Q9CR14	Q9CR14	E3 ubiquitin-protein ligase FANCL	Fancl	sp|Q9CR14|FANCL_MOUSE E3 ubiquitin-protein ligase FANCL OS=Mus musculus GN=Fancl PE=1 SV=1	1	3.5	0	11700	20785	10171	14985	11175	10975	14413	10771	8206.3	10065	18552	9310.5	12304	11775	21554	17841
Q01102	Q01102	P-selectin	Selp	sp|Q01102|LYAM3_MOUSE P-selectin OS=Mus musculus GN=Selp PE=1 SV=1	1	4.3	0	26960	16756	18626	22486	11363	8516.5	10600	11755	42496	16306	3217.8	9321.1	12535	7083.7	13282	10953
D3YZB0	D3YZB0		Fam129c	tr|D3YZB0|D3YZB0_MOUSE Protein Fam129c OS=Mus musculus GN=Fam129c PE=4 SV=1	2	5.6	0	9481.8	14670	23503	11530	9035.4	17769	23716	18606	9359.5	13506	7376.5	11337	12449	6025.1	19981	14872
E9PYC2	E9PYC2		Dcpp2	tr|E9PYC2|E9PYC2_MOUSE Protein Dcpp2 OS=Mus musculus GN=Dcpp2 PE=4 SV=1	2	24.6	0	5014.4	7952.8	57675	9183.8	10343	14835	15892	8114.7	8220.1	8402	67631	14089	13465	15037	13868	8545.7
B2RRL2	B2RRL2	Jerky protein homolog-like	Jrkl	sp|B2RRL2|JERKL_MOUSE Jerky protein homolog-like OS=Mus musculus GN=Jrkl PE=2 SV=1	2	7.6	0	14576	13771	21044	9625	11150	10309	10725	9475.7	13346	9192.5	11727	11523	14494	16016	23449	15560
Q9CWS1	Q9CWS1	E3 ubiquitin-protein ligase RNF135	Rnf135	sp|Q9CWS1|RN135_MOUSE E3 ubiquitin-protein ligase RNF135 OS=Mus musculus GN=Rnf135 PE=2 SV=1	1	3.4	0	17754	14848	24762	6253.5	13120	7401.8	21215	14994	9333.7	9532.4	14852	12336	10049	10080	20410	16076
P45591	P45591	Cofilin-2	Cfl2	sp|P45591|COF2_MOUSE Cofilin-2 OS=Mus musculus GN=Cfl2 PE=1 SV=1	4	26.5	0	17937	18024	19517	8357.6	11143	4420.1	19809	19318	22005	13811	11298	3040.6	16579	10088	20929	20427
Q9CWY9	Q9CWY9	RPA-interacting protein	Rpain	sp|Q9CWY9|RIP_MOUSE RPA-interacting protein OS=Mus musculus GN=Rpain PE=2 SV=1	1	8.2	0	22679	10791	16004	13681	13702	10282	13918	11092	12567	11290	15432	8009.2	17053	10114	14131	14956
B1ATY8	B1ATY8		Arl16	tr|B1ATY8|B1ATY8_MOUSE ADP-ribosylation factor-like 16 OS=Mus musculus GN=Arl16 PE=2 SV=1	1	6.9	0	11735	11970	33665	12657	16181	13937	9521	9260.2	13009	15125	18623	5861.1	11684	18773	12409	11010
Q8BMG1	Q8BMG1	ATR-interacting protein	Atrip	sp|Q8BMG1|ATRIP_MOUSE ATR-interacting protein OS=Mus musculus GN=Atrip PE=1 SV=2	1	2.9	0	15528	16756	17421	10071	17090	12511	19002	14659	16932	8655.3	7672.8	9724.5	13425	13139	16318	10213
P23336	P23336	N-acetyllactosaminide alpha-1,3-galactosyltransferase	Ggta1	sp|P23336|GGTA1_MOUSE N-acetyllactosaminide alpha-1,3-galactosyltransferase OS=Mus musculus GN=Ggta1 PE=2 SV=1	1	4.8	0	10860	12919	17709	12835	9823.6	11899	24587	10401	6673	14888	14336	9302.4	12130	23381	20007	12556
O88393	O88393	Transforming growth factor beta receptor type 3	Tgfbr3	sp|O88393|TGBR3_MOUSE Transforming growth factor beta receptor type 3 OS=Mus musculus GN=Tgfbr3 PE=1 SV=1	1	2.6	0	15468	17414	17214	10310	13252	13277	18418	11341	22142	10855	19460	5588.4	13015	6142	23877	10289
P17183	P17183	Gamma-enolase	Eno2	sp|P17183|ENOG_MOUSE Gamma-enolase OS=Mus musculus GN=Eno2 PE=1 SV=2	7	24.4	0	11005	22670	20938	2620.9	17157	7818.3	18167	22939	19611	20552	6205.8	5227.9	18339	8437.3	25515	23428
Q9DAI2	Q9DAI2	Intraflagellar transport protein 22 homolog	Ift22	sp|Q9DAI2|IFT22_MOUSE Intraflagellar transport protein 22 homolog OS=Mus musculus GN=Ift22 PE=1 SV=1	2	21.1	0	17665	14306	12795	7238.8	10577	16967	23901	17296	12835	11642	10643	5063.5	15405	12801	14642	23280
Q6A037	Q6A037	NEDD4-binding protein 1	N4bp1	sp|Q6A037|N4BP1_MOUSE NEDD4-binding protein 1 OS=Mus musculus GN=N4bp1 PE=1 SV=2	2	4.7	0	19231	15926	20742	15810	22799	2364.6	19867	11401	15347	16615	10220	3127.5	18284	8784.7	30250	20334
Q9EQR6	Q9EQR6	Fanconi anemia group G protein homolog	Fancg	sp|Q9EQR6|FANCG_MOUSE Fanconi anemia group G protein homolog OS=Mus musculus GN=Fancg PE=2 SV=1	1	2.2	0	11925	12750	19109	10094	17246	8399.6	16577	15752	10570	13655	10290	13272	17311	9181.7	16425	18480
F8VPN4	F8VPN4		Agl	tr|F8VPN4|F8VPN4_MOUSE Protein Agl OS=Mus musculus GN=Agl PE=4 SV=1	4	5.3	0	15014	13238	9930.2	40358	6106.5	20996	12798	11853	20325	5962.5	8568.6	28609	16051	19554	15238	5543
Q5DU41	Q5DU41	Volume-regulated anion channel subunit LRRC8B	Lrrc8b	sp|Q5DU41|LRC8B_MOUSE Volume-regulated anion channel subunit LRRC8B OS=Mus musculus GN=Lrrc8b PE=2 SV=3	3	6	0	12377	11317	21123	8310.3	13704	9075.9	13616	9883.7	12657	13967	13111	17266	13263	12963	28185	16555
Q99J64	Q99J64	RNA-binding protein 43	Rbm43	sp|Q99J64|RBM43_MOUSE RNA-binding protein 43 OS=Mus musculus GN=Rbm43 PE=2 SV=1	1	3.8	0	9887.7	11292	24012	9192.9	8533.5	19427	20062	10803	17772	12722	12367	7347.8	16178	14041	17414	19189
Q91V17	Q91V17	E3 ubiquitin-protein ligase ZNRF1	Znrf1	sp|Q91V17|ZNRF1_MOUSE E3 ubiquitin-protein ligase ZNRF1 OS=Mus musculus GN=Znrf1 PE=1 SV=1	1	8.8	0	10690	12007	21163	10374	17554	14531	18906	9796.6	15989	12789	15403	8981.9	12199	12463	16898	16725
Q8K010	Q8K010	5-oxoprolinase	Oplah	sp|Q8K010|OPLA_MOUSE 5-oxoprolinase OS=Mus musculus GN=Oplah PE=2 SV=1	2	3.1	0	15716	15579	17689	15433	7347.7	21187	11592	12530	11449	8273.3	12188	14564	17060	12018	21027	20521
Q9QY30	Q9QY30	Bile salt export pump	Abcb11	sp|Q9QY30|ABCBB_MOUSE Bile salt export pump OS=Mus musculus GN=Abcb11 PE=1 SV=2	1	1.3	0	15545	17373	20159	7739.4	19581	12578	21797	16161	12668	11251	8924.2	9234.2	17675	11526	21027	12369
Q9R045	Q9R045	Angiopoietin-related protein 2	Angptl2	sp|Q9R045|ANGL2_MOUSE Angiopoietin-related protein 2 OS=Mus musculus GN=Angptl2 PE=2 SV=2	2	5.9	0	13162	14217	14732	11936	10452	14525	20581	14227	9302.4	10723	14358	10187	17037	13935	27049	17368
Q9DB70	Q9DB70	FUN14 domain-containing protein 1	Fundc1	sp|Q9DB70|FUND1_MOUSE FUN14 domain-containing protein 1 OS=Mus musculus GN=Fundc1 PE=2 SV=1	1	15.5	0	16777	13332	22773	8023.4	11768	15077	16685	11565	12589	10706	14003	14191	18003	17886	19744	10336
Q504P2	Q504P2	C-type lectin domain family 12 member A	Clec12a	sp|Q504P2|CL12A_MOUSE C-type lectin domain family 12 member A OS=Mus musculus GN=Clec12a PE=2 SV=1	1	8.2	0	10753	7206.5	20509	16521	14118	15503	22812	11997	10828	11835	15555	9910.9	18226	25767	13657	15989
Q9CZW6	Q9CZW6	E3 ubiquitin-protein ligase RNF146	Rnf146	sp|Q9CZW6|RN146_MOUSE E3 ubiquitin-protein ligase RNF146 OS=Mus musculus GN=Rnf146 PE=1 SV=2	2	11.4	0	24285	16947	16051	8639.6	14693	6894.9	22853	19241	25068	18051	5621.8	3628.3	18946	11320	35955	23040
Q8BFQ9	Q8BFQ9	Kelch-like protein 42	Klhl42	sp|Q8BFQ9|KLH42_MOUSE Kelch-like protein 42 OS=Mus musculus GN=Klhl42 PE=2 SV=1	2	6.3	0	16615	18322	24021	8251.1	18999	9555.5	14859	10667	18754	8329.6	16769	9781.3	23592	12666	23621	13930
Q9CR22	Q9CR22	Transmembrane protein 42	Tmem42	sp|Q9CR22|TMM42_MOUSE Transmembrane protein 42 OS=Mus musculus GN=Tmem42 PE=2 SV=1	1	16.6	0	15120	23701	18387	13720	16844	16035	21192	16075	19415	6792.3	13695	12337	11549	7345.9	15457	20873
Q8C9M2	Q8C9M2	Coiled-coil domain-containing protein 15	Ccdc15	sp|Q8C9M2|CCD15_MOUSE Coiled-coil domain-containing protein 15 OS=Mus musculus GN=Ccdc15 PE=2 SV=2	3	7.3	0	8683.1	13215	21867	11509	14132	15561	17451	18313	17231	15922	20307	9350	13876	17786	12343	17557
Q69ZJ7	Q69ZJ7	RAB6A-GEF complex partner protein 1	Ric1	sp|Q69ZJ7|RIC1_MOUSE RAB6A-GEF complex partner protein 1 OS=Mus musculus GN=Ric1 PE=2 SV=2	2	3	0	19376	14913	17754	7622	10230	15083	25823	18092	24586	10538	10784	7828.8	15282	15590	23736	16472
Q9JKK0	Q9JKK0	Calcipressin-3	Rcan3	sp|Q9JKK0|RCAN3_MOUSE Calcipressin-3 OS=Mus musculus GN=Rcan3 PE=2 SV=1	1	7.9	0	9600.7	9691.4	16672	10667	27003	9794.6	31136	33693	10581	11371	11806	2510.6	23457	11981	33657	37314
Q9D952	Q9D952	Envoplakin	Evpl	sp|Q9D952|EVPL_MOUSE Envoplakin OS=Mus musculus GN=Evpl PE=2 SV=3	1	0.7	0	11210	6748.6	22594	8692	13730	20703	18966	16606	11059	5228.7	23760	17058	16551	25531	25251	23751
P56695	P56695	Wolframin	Wfs1	sp|P56695|WFS1_MOUSE Wolframin OS=Mus musculus GN=Wfs1 PE=1 SV=1	1	1.5	0	13928	13899	26602	11566	12010	21740	20425	12368	8370.5	20125	17457	8813.1	15045	18662	20363	16366
Q91X52	Q91X52	L-xylulose reductase	Dcxr	sp|Q91X52|DCXR_MOUSE L-xylulose reductase OS=Mus musculus GN=Dcxr PE=2 SV=2	3	16	0	12899	11448	25387	15519	10982	13294	16773	19379	16663	10023	15484	11168	17915	14789	15469	31735
O35719	O35719	DNA repair protein RAD51 homolog 2	Rad51b	sp|O35719|RA51B_MOUSE DNA repair protein RAD51 homolog 2 OS=Mus musculus GN=Rad51b PE=2 SV=2	1	3.1	0	15112	11875	23368	17098	14016	11463	19951	10713	21656	14947	14109	9473.6	16954	17204	21195	17100
Q8BFW3	Q8BFW3	Protein phosphatase 1 regulatory subunit 15B	Ppp1r15b	sp|Q8BFW3|PR15B_MOUSE Protein phosphatase 1 regulatory subunit 15B OS=Mus musculus GN=Ppp1r15b PE=1 SV=1	1	3.4	0	18590	18084	20022	19707	13283	15571	10438	18125	15559	14799	7592.2	10245	20099	18014	21061	20325
A2AR50	A2AR50	Ras-specific guanine nucleotide-releasing factor RalGPS1	Ralgps1	sp|A2AR50|RGPS1_MOUSE Ras-specific guanine nucleotide-releasing factor RalGPS1 OS=Mus musculus GN=Ralgps1 PE=1 SV=2	2	3.2	0	17619	17269	25302	5243.1	13953	15233	23754	9458.8	21013	21645	14288	10958	13841	14472	21978	24169
A2APV2	A2APV2	Formin-like protein 2	Fmnl2	sp|A2APV2|FMNL2_MOUSE Formin-like protein 2 OS=Mus musculus GN=Fmnl2 PE=2 SV=2	6	5.5	0	13686	11635	20664	10002	16974	20122	22168	18587	17315	11815	10378	10879	16429	27085	21842	19245
B2RX88	B2RX88	Centrosome and spindle pole associated protein 1	Cspp1	sp|B2RX88|CSPP1_MOUSE Centrosome and spindle pole associated protein 1 OS=Mus musculus GN=Cspp1 PE=1 SV=2	1	1	0	19473	19909	24577	8375.1	12164	17751	21030	18616	21472	15747	14445	9081.1	15697	11167	20307	21798
P82347	P82347	Delta-sarcoglycan	Sgcd	sp|P82347|SGCD_MOUSE Delta-sarcoglycan OS=Mus musculus GN=Sgcd PE=1 SV=1	1	5.5	0	24571	23719	22203	6407.4	14927	16407	21173	11323	16187	22249	8202.2	11406	19277	17785	25054	18871
B1AXH1	B1AXH1	NHS-like protein 2	Nhsl2	sp|B1AXH1|NHSL2_MOUSE NHS-like protein 2 OS=Mus musculus GN=Nhsl2 PE=2 SV=1	1	1.6	0	20481	16646	19862	13690	13777	17700	27803	9998.5	16408	17964	11416	9670.4	12128	32075	17569	19124
H3BKF4;O55101	H3BKF4;O55101	Synaptogyrin-2	Gm20708;Syngr2	tr|H3BKF4|H3BKF4_MOUSE Protein Gm20708 OS=Mus musculus GN=Gm20708 PE=4 SV=1;sp|O55101|SNG2_MOUSE Synaptogyrin-2 OS=Mus musculus GN=Syngr2 PE=2 SV=1	2	12.3	0	12967	19615	19976	9049.1	16621	11252	22229	18030	16925	13345	17806	13201	20670	14674	27420	18321
Q8VCG4	Q8VCG4	Complement component C8 gamma chain	C8g	sp|Q8VCG4|CO8G_MOUSE Complement component C8 gamma chain OS=Mus musculus GN=C8g PE=1 SV=1	1	6.9	0	20386	10203	25280	11439	16391	29937	21036	18875	16110	9037.8	8246.8	11280	20236	28544	18376	17652
O89103	O89103	Complement component C1q receptor	Cd93	sp|O89103|C1QR1_MOUSE Complement component C1q receptor OS=Mus musculus GN=Cd93 PE=1 SV=1	1	5	0	16676	7169.2	15427	17705	12427	19035	29073	17583	11598	8688.2	15421	20112	17534	28397	25564	19058
E9Q6E9	E9Q6E9		Simc1	tr|E9Q6E9|E9Q6E9_MOUSE Protein Simc1 OS=Mus musculus GN=Simc1 PE=4 SV=1	2	2.7	0	18985	17920	21562	11755	14993	11430	27015	20857	15204	13817	14755	11695	20754	11986	20356	19869
E9Q6D8	E9Q6D8		C6	tr|E9Q6D8|E9Q6D8_MOUSE Protein C6 OS=Mus musculus GN=C6 PE=4 SV=1	2	3.7	0	7705.1	9319.6	25013	12001	20625	24310	25645	16276	14792	9084.6	16426	13092	16682	19418	34732	22440
Q9CS84	Q9CS84	Neurexin-1	Nrxn1	sp|Q9CS84|NRX1A_MOUSE Neurexin-1 OS=Mus musculus GN=Nrxn1 PE=1 SV=3	2	3.3	0	5899.3	10233	20407	21289	21814	40946	16119	12595	17302	13881	16582	22907	13330	46943	16817	9916
Q9CR35	Q9CR35	Chymotrypsinogen B;Chymotrypsin B chain A;Chymotrypsin B chain B;Chymotrypsin B chain C	Ctrb1	sp|Q9CR35|CTRB1_MOUSE Chymotrypsinogen B OS=Mus musculus GN=Ctrb1 PE=2 SV=1	1	8	0	6673.5	16879	22025	17096	14223	44023	16975	20043	11474	5330.3	13643	20583	20874	33363	23292	18060
Q80X44	Q80X44	Zinc finger and BTB domain-containing protein 24	Zbtb24	sp|Q80X44|ZBT24_MOUSE Zinc finger and BTB domain-containing protein 24 OS=Mus musculus GN=Zbtb24 PE=1 SV=1	2	8.3	0	19849	18871	26547	9241.2	18993	11354	26526	14933	23338	23112	13523	6528.3	22936	15522	24399	15208
Q9CPY3	Q9CPY3	Sororin	Cdca5	sp|Q9CPY3|CDCA5_MOUSE Sororin OS=Mus musculus GN=Cdca5 PE=1 SV=1	3	14.8	0	14981	16542	21818	9671.5	12921	18319	23098	15751	13702	14758	18117	22088	16943	21564	23678	17484
Q5NCI0	Q5NCI0	Up-regulator of cell proliferation	Urgcp	sp|Q5NCI0|URGCP_MOUSE Up-regulator of cell proliferation OS=Mus musculus GN=Urgcp PE=2 SV=1	1	2.9	0	22335	22101	21420	13129	10427	16793	14465	23487	16694	19296	19165	5150.8	22237	22171	24981	21622
Q8CDJ3	Q8CDJ3	Beclin 1-associated autophagy-related key regulator	Atg14	sp|Q8CDJ3|BAKOR_MOUSE Beclin 1-associated autophagy-related key regulator OS=Mus musculus GN=Atg14 PE=1 SV=1	2	5.1	0	18880	24194	19446	10297	15637	16291	18291	14227	20758	13333	14991	12617	26801	15558	21358	25932
P60330	P60330	Separin	Espl1	sp|P60330|ESPL1_MOUSE Separin OS=Mus musculus GN=Espl1 PE=1 SV=1	2	1.8	0	17759	11222	26354	15709	22948	18820	22944	21833	17936	9515.6	16208	13798	21842	16473	24994	12391
Q99NI3	Q99NI3	General transcription factor II-I repeat domain-containing protein 2	Gtf2ird2	sp|Q99NI3|GT2D2_MOUSE General transcription factor II-I repeat domain-containing protein 2 OS=Mus musculus GN=Gtf2ird2 PE=2 SV=1	2	3.3	0	23559	21382	24573	5424.2	17903	15085	16045	20361	20695	17206	12475	13022	18074	19730	25901	24178
P47879	P47879	Insulin-like growth factor-binding protein 4	Igfbp4	sp|P47879|IBP4_MOUSE Insulin-like growth factor-binding protein 4 OS=Mus musculus GN=Igfbp4 PE=2 SV=2	1	6.7	0	11798	12800	30734	33120	15145	34537	9662.8	12019	9252.1	9301	27595	41042	18818	28750	12220	12790
Q9Z2Y3	Q9Z2Y3	Homer protein homolog 1	Homer1	sp|Q9Z2Y3|HOME1_MOUSE Homer protein homolog 1 OS=Mus musculus GN=Homer1 PE=1 SV=2	1	4.1	0	29886	15315	31335	9158.4	13763	9408.7	16174	17216	21650	20851	12469	14386	31254	13204	29894	17304
Q6PFX9	Q6PFX9	Tankyrase-1	Tnks	sp|Q6PFX9|TNKS1_MOUSE Tankyrase-1 OS=Mus musculus GN=Tnks PE=1 SV=1	1	1.2	0	15586	28141	31814	9705.1	16022	13845	24101	16607	14059	15983	18439	9954.5	22178	15602	27189	18283
Q9JJE7	Q9JJE7	Fatty acid desaturase 3	Fads3	sp|Q9JJE7|FADS3_MOUSE Fatty acid desaturase 3 OS=Mus musculus GN=Fads3 PE=2 SV=2	2	10.7	0	5393.2	10220	25082	20062	18130	25980	16182	18111	12395	7637.5	20364	22105	20670	29829	43524	19864
Q9CQC2	Q9CQC2	Colipase	Clps	sp|Q9CQC2|COL_MOUSE Colipase OS=Mus musculus GN=Clps PE=2 SV=1	1	16.8	0	11343	12283	10637	42560	13281	46998	16480	16025	11550	6698.9	10593	33696	24439	54471	12592	19811
Q9QUN3	Q9QUN3	B-cell linker protein	Blnk	sp|Q9QUN3|BLNK_MOUSE B-cell linker protein OS=Mus musculus GN=Blnk PE=1 SV=1	1	5.3	0	18133	10024	19508	10604	20981	22355	22883	23944	23494	17029	14596	12853	25498	12286	25040	17462
Q80UF7	Q80UF7	TIR domain-containing adapter molecule 1	Ticam1	sp|Q80UF7|TCAM1_MOUSE TIR domain-containing adapter molecule 1 OS=Mus musculus GN=Ticam1 PE=1 SV=1	1	3.1	0	13266	20176	20731	17548	15669	15364	20691	16718	18250	20540	13946	11154	21305	21553	23511	20048
Q3TA59	Q3TA59	JmjC domain-containing protein 8	Jmjd8	sp|Q3TA59|JMJD8_MOUSE JmjC domain-containing protein 8 OS=Mus musculus GN=Jmjd8 PE=2 SV=2	1	4.1	0	20149	24280	34230	15344	12357	17437	21829	18749	22543	9618.1	13816	8633.9	23838	15807	25638	18267
P18911	P18911	Retinoic acid receptor gamma	Rarg	sp|P18911|RARG_MOUSE Retinoic acid receptor gamma OS=Mus musculus GN=Rarg PE=1 SV=3	1	4.4	0	26207	16697	21062	11581	14503	14922	30397	21082	12202	14259	17077	14379	21630	16430	20659	22670
Q5IRJ6	Q5IRJ6	Zinc transporter 9	Slc30a9	sp|Q5IRJ6|ZNT9_MOUSE Zinc transporter 9 OS=Mus musculus GN=Slc30a9 PE=1 SV=2	1	2.8	0	11612	15057	31306	18929	22567	21413	16243	14413	17631	14050	25494	17096	17500	19654	16536	18687
Q9CWP8	Q9CWP8	DNA polymerase delta subunit 4	Pold4	sp|Q9CWP8|DPOD4_MOUSE DNA polymerase delta subunit 4 OS=Mus musculus GN=Pold4 PE=2 SV=1	1	23.4	0	21042	21024	25421	10165	18923	12757	22500	23241	24804	22159	10059	15127	23631	10158	23584	23403
P06795	P06795	Multidrug resistance protein 1B	Abcb1b	sp|P06795|MDR1B_MOUSE Multidrug resistance protein 1B OS=Mus musculus GN=Abcb1b PE=1 SV=1	16	16.6	0	19154	15335	27858	11109	16779	17653	29169	25730	15979	15451	14472	9886	20879	19533	22146	25086
Q6ZPI0	Q6ZPI0	Protein Jade-1	Jade1	sp|Q6ZPI0|JADE1_MOUSE Protein Jade-1 OS=Mus musculus GN=Jade1 PE=1 SV=2	1	2.2	0	20563	12074	26531	20231	18792	12128	23614	18418	17256	17157	23278	11674	19630	16132	20906	25135
Q9JMK2	Q9JMK2	Casein kinase I isoform epsilon	Csnk1e	sp|Q9JMK2|KC1E_MOUSE Casein kinase I isoform epsilon OS=Mus musculus GN=Csnk1e PE=1 SV=2	7	21.6	0	33119	24616	22034	9898.6	18852	14609	12904	27340	27587	19247	13828	10345	19785	21545	28109	18662
Q9Z0V8	Q9Z0V8	Mitochondrial import inner membrane translocase subunit Tim17-A	Timm17a	sp|Q9Z0V8|TI17A_MOUSE Mitochondrial import inner membrane translocase subunit Tim17-A OS=Mus musculus GN=Timm17a PE=2 SV=1	2	26.3	0	20391	26199	24853	10553	16781	21584	22566	13548	20323	14237	21306	18185	22766	17112	24516	18386
Q64314	Q64314	Hematopoietic progenitor cell antigen CD34	Cd34	sp|Q64314|CD34_MOUSE Hematopoietic progenitor cell antigen CD34 OS=Mus musculus GN=Cd34 PE=1 SV=1	1	2.9	0	16923	12229	28481	18536	16206	30965	23036	19255	13671	9624.6	15912	17137	20011	28477	26093	25593
P51683	P51683	C-C chemokine receptor type 2	Ccr2	sp|P51683|CCR2_MOUSE C-C chemokine receptor type 2 OS=Mus musculus GN=Ccr2 PE=1 SV=2	1	4.8	0	16905	19321	20282	16058	22091	16673	27590	26019	15411	16232	15672	17494	18924	15697	22243	26112
Q8CEE6	Q8CEE6	PAS domain-containing serine/threonine-protein kinase	Pask	sp|Q8CEE6|PASK_MOUSE PAS domain-containing serine/threonine-protein kinase OS=Mus musculus GN=Pask PE=2 SV=3	1	1.1	0	20336	23279	23441	14079	11967	32557	20575	20563	28838	10725	12806	12235	23274	21639	25323	20986
Q9WUE4	Q9WUE4	Nitrogen permease regulator 2-like protein	Nprl2	sp|Q9WUE4|NPRL2_MOUSE Nitrogen permease regulator 2-like protein OS=Mus musculus GN=Nprl2 PE=2 SV=1	2	8.7	0	26168	17939	27755	7578	17172	15083	35390	17480	24269	17994	16117	17278	24313	16324	25064	20340
P12849	P12849	cAMP-dependent protein kinase type I-beta regulatory subunit	Prkar1b	sp|P12849|KAP1_MOUSE cAMP-dependent protein kinase type I-beta regulatory subunit OS=Mus musculus GN=Prkar1b PE=2 SV=2	3	9.2	0	25174	24272	28573	9127.2	15676	13798	29665	24878	19446	25117	16325	8986.9	24186	14148	26605	27206
Q9D8U7	Q9D8U7	DTW domain-containing protein 1	Dtwd1	sp|Q9D8U7|DTWD1_MOUSE DTW domain-containing protein 1 OS=Mus musculus GN=Dtwd1 PE=2 SV=1	1	6.9	0	27276	20946	21106	10266	19852	20523	21268	19292	24273	17620	13027	16200	24002	23761	24556	17366
Q61271	Q61271	Activin receptor type-1B	Acvr1b	sp|Q61271|ACV1B_MOUSE Activin receptor type-1B OS=Mus musculus GN=Acvr1b PE=1 SV=1	1	2.6	0	29626	16458	29106	8210.4	25043	16838	23506	16721	17427	17345	13688	20736	23541	21313	24403	22761
O88713	O88713	Killer cell lectin-like receptor subfamily G member 1	Klrg1	sp|O88713|KLRG1_MOUSE Killer cell lectin-like receptor subfamily G member 1 OS=Mus musculus GN=Klrg1 PE=1 SV=2	1	11.7	0	24992	20853	24066	16360	21509	17986	27251	18753	18830	19513	18826	15354	15294	11437	32437	19697
P35343	P35343	C-X-C chemokine receptor type 2	Cxcr2	sp|P35343|CXCR2_MOUSE C-X-C chemokine receptor type 2 OS=Mus musculus GN=Cxcr2 PE=2 SV=1	1	5	0	20031	24747	29883	8270.4	20238	16173	22348	24082	35190	18441	14232	6515.3	20983	26918	32711	21245
D2EAC2	D2EAC2	Zinc finger BED domain-containing protein 6	Zbed6	sp|D2EAC2|ZBED6_MOUSE Zinc finger BED domain-containing protein 6 OS=Mus musculus GN=Zbed6 PE=1 SV=1	1	1.7	0	18248	21026	30507	21100	19424	18958	27083	21635	15159	32229	18806	6919	27315	18206	22146	14025
Q8BTN6	Q8BTN6	Leukocyte receptor cluster member 9	Leng9	sp|Q8BTN6|LENG9_MOUSE Leukocyte receptor cluster member 9 OS=Mus musculus GN=Leng9 PE=2 SV=1	1	8.2	0	25850	44390	17062	8043.2	18580	18949	28137	23622	22664	18146	5902.8	16773	21676	23027	27946	28749
P09838	P09838	DNA nucleotidylexotransferase	Dntt	sp|P09838|TDT_MOUSE DNA nucleotidylexotransferase OS=Mus musculus GN=Dntt PE=1 SV=3	1	2.3	0	29232	24773	26347	19525	18478	27308	30810	17711	12531	17655	18587	12091	21871	18943	22130	16149
Q9CYQ7	Q9CYQ7	Nuclear prelamin A recognition factor	Narf	sp|Q9CYQ7|NARF_MOUSE Nuclear prelamin A recognition factor OS=Mus musculus GN=Narf PE=2 SV=1	2	5	0	21075	18792	30812	21139	17938	20061	20374	16581	19078	18648	18014	13252	19054	23873	23252	30015
Q9CQ36	Q9CQ36	DNA polymerase epsilon subunit 4	Pole4	sp|Q9CQ36|DPOE4_MOUSE DNA polymerase epsilon subunit 4 OS=Mus musculus GN=Pole4 PE=3 SV=1	1	9.3	0	22262	25083	33819	8943.8	21065	11496	34933	19687	15466	24661	16647	14214	27847	15846	31852	24957
Q9CQZ1	Q9CQZ1	Heat shock factor-binding protein 1	Hsbp1	sp|Q9CQZ1|HSBP1_MOUSE Heat shock factor-binding protein 1 OS=Mus musculus GN=Hsbp1 PE=2 SV=1	1	25	0	24497	25651	24374	20842	19201	17571	20015	13879	17091	28179	15207	12444	41473	12239	23923	27736
A1L3P4	A1L3P4	Sodium/hydrogen exchanger	Slc9a6	tr|A1L3P4|A1L3P4_MOUSE Protein Slc9a6 OS=Mus musculus GN=Slc9a6 PE=1 SV=1	4	9.4	0	20665	20909	31971	15785	18549	23145	33462	16518	17135	17998	22096	22457	31144	11993	14790	23695
Q07763	Q07763	Natural killer cell receptor 2B4	Cd244	sp|Q07763|CD244_MOUSE Natural killer cell receptor 2B4 OS=Mus musculus GN=Cd244 PE=1 SV=3	1	4.3	0	21272	23313	22426	11833	24983	18627	26898	23036	18951	33558	18869	13656	18508	15704	25089	23623
Q9D136	Q9D136	2-oxoglutarate and iron-dependent oxygenase domain-containing protein 3	Ogfod3	sp|Q9D136|OGFD3_MOUSE 2-oxoglutarate and iron-dependent oxygenase domain-containing protein 3 OS=Mus musculus GN=Ogfod3 PE=2 SV=1	1	4.4	0	23850	20521	28226	23572	16275	23657	22558	13210	12987	17163	18938	21477	22970	28769	24893	19973
Q3UIW5	Q3UIW5	RING finger protein 10	Rnf10	sp|Q3UIW5|RNF10_MOUSE RING finger protein 10 OS=Mus musculus GN=Rnf10 PE=2 SV=2	1	1.5	0	28721	24923	23133	16455	21863	14250	26763	16438	17986	15374	14400	17327	25681	25363	29795	24297
Q8C4X1	Q8C4X1	Centromere protein X	Stra13	sp|Q8C4X1|CENPX_MOUSE Centromere protein X OS=Mus musculus GN=Stra13 PE=2 SV=1	1	25.6	0	26343	18585	17928	17790	19148	25177	27844	22411	16193	20490	15911	25207	21564	19221	22868	20506
Q9DBT4	Q9DBT4	Ectonucleoside triphosphate diphosphohydrolase 4	Entpd4	sp|Q9DBT4|ENTP4_MOUSE Ectonucleoside triphosphate diphosphohydrolase 4 OS=Mus musculus GN=Entpd4 PE=2 SV=1	2	7.8	0	21875	21578	25805	15662	16335	16962	32098	27949	25879	17449	18379	18098	21167	20411	19547	21659
Q6T264	Q6T264	Mastermind-like protein 1	Maml1	sp|Q6T264|MAML1_MOUSE Mastermind-like protein 1 OS=Mus musculus GN=Maml1 PE=1 SV=2	1	1	0	26336	19536	31614	13573	25238	15268	22857	25905	16586	26464	15760	12922	26619	19874	26947	21168
Q9D1F3	Q9D1F3	Uncharacterized protein CXorf40 homolog		sp|Q9D1F3|CX040_MOUSE Uncharacterized protein CXorf40 homolog OS=Mus musculus PE=2 SV=1	1	10.2	0	34031	25461	28827	15611	20133	7083.3	37849	23434	33819	19935	15034	10651	27893	8374.3	36469	30214
Q8K2I2	Q8K2I2	Coiled-coil alpha-helical rod protein 1	Cchcr1	sp|Q8K2I2|CCHCR_MOUSE Coiled-coil alpha-helical rod protein 1 OS=Mus musculus GN=Cchcr1 PE=2 SV=3	1	3	0	21865	21619	27841	21454	21454	17927	21548	18292	29768	20228	15437	16379	18686	21250	22858	23473
Q9D176	Q9D176	Sushi domain-containing protein 3	Susd3	sp|Q9D176|SUSD3_MOUSE Sushi domain-containing protein 3 OS=Mus musculus GN=Susd3 PE=2 SV=1	1	5.6	0	23704	25392	34382	14241	20836	12910	30879	14291	23753	20504	19021	19438	19945	21807	25728	20239
Q3UP24	Q3UP24	NLR family CARD domain-containing protein 4	Nlrc4	sp|Q3UP24|NLRC4_MOUSE NLR family CARD domain-containing protein 4 OS=Mus musculus GN=Nlrc4 PE=1 SV=1	2	2.7	0	28050	26420	31716	7953.1	21879	22459	26061	19814	26821	21029	13143	15051	23385	22357	16754	32035
Q5SXJ3	Q5SXJ3	Fanconi anemia group J protein homolog	Brip1	sp|Q5SXJ3|FANCJ_MOUSE Fanconi anemia group J protein homolog OS=Mus musculus GN=Brip1 PE=2 SV=1	1	1.1	0	28463	24353	20313	19001	25768	17894	21013	20861	23064	13560	16916	17073	29011	18051	23782	24609
Q8R3P9	Q8R3P9	Ankyrin repeat domain-containing protein 32	Ankrd32	sp|Q8R3P9|ANR32_MOUSE Ankyrin repeat domain-containing protein 32 OS=Mus musculus GN=Ankrd32 PE=2 SV=3	1	1.1	0	22302	20903	25331	19985	18806	26716	26791	14888	23164	16373	24027	19896	17896	21587	20994	21856
Q3T9Z9	Q3T9Z9	Zinc finger with UFM1-specific peptidase domain protein	Zufsp	sp|Q3T9Z9|ZUFSP_MOUSE Zinc finger with UFM1-specific peptidase domain protein OS=Mus musculus GN=Zufsp PE=2 SV=2	1	2.8	0	25021	26906	34176	12634	15476	15034	28720	23314	15534	14693	21935	21010	25370	25225	34253	16930
Q9D7G4	Q9D7G4	Protein EURL homolog	Eurl	sp|Q9D7G4|EURL_MOUSE Protein EURL homolog OS=Mus musculus GN=Eurl PE=2 SV=1	2	8.6	0	21100	23007	24934	15646	25675	24754	26894	21717	29740	16357	18515	16344	23731	17533	21791	18880
Q8BZB2	Q8BZB2	Phosphopantothenoylcysteine decarboxylase	Ppcdc	sp|Q8BZB2|COAC_MOUSE Phosphopantothenoylcysteine decarboxylase OS=Mus musculus GN=Ppcdc PE=2 SV=1	3	22.5	0	41393	28618	23355	9218.2	20844	9444.8	39736	31400	31791	24349	12682	10394	35360	11574	31722	22403
P15975	P15975	Inactive ubiquitin carboxyl-terminal hydrolase 53	Usp53	sp|P15975|UBP53_MOUSE Inactive ubiquitin carboxyl-terminal hydrolase 53 OS=Mus musculus GN=Usp53 PE=2 SV=2	1	1.2	0	31177	27693	28480	16012	15726	19057	27541	19419	26352	20808	15936	10854	23904	24241	23334	24428
O70443	O70443	Guanine nucleotide-binding protein G(z) subunit alpha	Gnaz	sp|O70443|GNAZ_MOUSE Guanine nucleotide-binding protein G(z) subunit alpha OS=Mus musculus GN=Gnaz PE=2 SV=4	2	6.5	0	29996	17221	29564	23533	17176	24556	18826	15540	35643	19900	21703	14871	24541	18937	21467	19772
Q3UH93	Q3UH93	Plexin-D1	Plxnd1	sp|Q3UH93|PLXD1_MOUSE Plexin-D1 OS=Mus musculus GN=Plxnd1 PE=1 SV=1	2	1.5	0	23520	11438	29891	24522	11828	17807	28074	21516	25563	11856	26620	29609	20861	19087	33822	24847
Q3U0S6	Q3U0S6	Ras-interacting protein 1	Rasip1	sp|Q3U0S6|RAIN_MOUSE Ras-interacting protein 1 OS=Mus musculus GN=Rasip1 PE=1 SV=3	1	2.1	0	25750	24297	20250	20240	21809	20175	26275	17942	23077	21238	12420	19606	25347	18245	28815	24093
Q62225	Q62225	Cytokine-inducible SH2-containing protein	Cish	sp|Q62225|CISH_MOUSE Cytokine-inducible SH2-containing protein OS=Mus musculus GN=Cish PE=1 SV=1	1	5.1	0	32562	33552	24741	10891	30080	14449	38958	29701	25051	21132	13379	7465.2	27543	7036.2	32747	42661
Q9EQY0	Q9EQY0	Serine/threonine-protein kinase/endoribonuclease IRE1;Serine/threonine-protein kinase;Endoribonuclease	Ern1	sp|Q9EQY0|ERN1_MOUSE Serine/threonine-protein kinase/endoribonuclease IRE1 OS=Mus musculus GN=Ern1 PE=1 SV=1	1	2	0	31177	17753	36710	13344	15801	17005	37116	27255	18253	22866	14705	17518	17716	22131	26914	25843
Q9DBW3	Q9DBW3	Protein NATD1	Natd1	sp|Q9DBW3|NATD1_MOUSE Protein NATD1 OS=Mus musculus GN=Natd1 PE=2 SV=1	1	10.9	0	20633	26043	27441	12837	22036	15431	26935	19543	23283	25969	16454	14450	24210	16263	36488	31291
Q8BXL9	Q8BXL9	Intermediate filament family orphan 1	Iffo1	sp|Q8BXL9|IFFO1_MOUSE Intermediate filament family orphan 1 OS=Mus musculus GN=Iffo1 PE=2 SV=1	1	3	0	26341	18543	29713	19972	21283	21305	16548	24384	20414	21252	24680	21151	15127	25770	27882	17583
Q01341	Q01341	Adenylate cyclase type 6	Adcy6	sp|Q01341|ADCY6_MOUSE Adenylate cyclase type 6 OS=Mus musculus GN=Adcy6 PE=1 SV=1	2	3.9	0	26974	21081	25023	18479	23215	20058	28873	21142	27013	14480	20583	13015	21500	19144	32109	22410
Q9CZT8	Q9CZT8	Ras-related protein Rab-3B	Rab3b	sp|Q9CZT8|RAB3B_MOUSE Ras-related protein Rab-3B OS=Mus musculus GN=Rab3b PE=1 SV=1	2	12.3	0	33797	13235	26135	22191	19583	25387	23617	17133	25301	15826	17694	24211	32044	18258	27210	16782
Q9CPV2	Q9CPV2	Anaphase-promoting complex subunit 16	Anapc16	sp|Q9CPV2|APC16_MOUSE Anaphase-promoting complex subunit 16 OS=Mus musculus GN=Anapc16 PE=2 SV=1	2	41.8	0	28937	9267.7	35440	17430	23146	19011	31402	23433	23771	14865	20664	12316	23664	21730	38132	25688
Q60780	Q60780	Growth arrest-specific protein 7	Gas7	sp|Q60780|GAS7_MOUSE Growth arrest-specific protein 7 OS=Mus musculus GN=Gas7 PE=1 SV=1	1	5.2	0	26169	14847	27358	11799	16378	25130	43482	19821	17101	14841	17927	13793	25429	34786	32252	30669
P28661	P28661	Septin-4	2020-09-04	sp|P28661|SEPT4_MOUSE Septin-4 OS=Mus musculus GN=Sept4 PE=1 SV=1	5	14.4	0	27416	24125	21743	18459	20684	17869	25544	19114	25666	25097	16652	14864	17721	23128	31741	24653
Q3ZK22	Q3ZK22	Vezatin	Vezt	sp|Q3ZK22|VEZA_MOUSE Vezatin OS=Mus musculus GN=Vezt PE=1 SV=2	1	2.2	0	27401	21487	27301	14893	20510	27829	18352	22112	21374	17117	25505	21356	20055	22373	25334	20310
Q3UHK8	Q3UHK8	Trinucleotide repeat-containing gene 6A protein	Tnrc6a	sp|Q3UHK8|TNR6A_MOUSE Trinucleotide repeat-containing gene 6A protein OS=Mus musculus GN=Tnrc6a PE=2 SV=1	2	2.1	0	22222	19918	30317	13599	23234	19059	21804	30158	25497	21411	19392	15646	20102	18459	32036	24565
Q9DAG9	Q9DAG9	PHD finger protein 7	Phf7	sp|Q9DAG9|PHF7_MOUSE PHD finger protein 7 OS=Mus musculus GN=Phf7 PE=1 SV=1	1	6.2	0	22145	27878	37487	12855	20191	19634	25544	17971	20803	21797	17299	19620	24122	19364	37894	19519
P09803	P09803	Cadherin-1;E-Cad/CTF1;E-Cad/CTF2;E-Cad/CTF3	Cdh1	sp|P09803|CADH1_MOUSE Cadherin-1 OS=Mus musculus GN=Cdh1 PE=1 SV=1	1	1.6	0	19015	18380	36226	23034	25636	29062	17501	11988	21301	20548	21576	21057	24018	19355	29153	24800
P70406	P70406	Mitochondrial uncoupling protein 2	Ucp2	sp|P70406|UCP2_MOUSE Mitochondrial uncoupling protein 2 OS=Mus musculus GN=Ucp2 PE=1 SV=1	1	5.2	0	21487	32497	26248	17766	36969	19748	14209	13690	15255	15491	25987	20487	34314	20656	36985	21198
Q9Z1E3	Q9Z1E3	NF-kappa-B inhibitor alpha	Nfkbia	sp|Q9Z1E3|IKBA_MOUSE NF-kappa-B inhibitor alpha OS=Mus musculus GN=Nfkbia PE=1 SV=2	1	4.5	0	37924	27486	24789	11610	16684	20433	36281	18898	31046	27392	10136	8288.7	23240	19362	38341	37970
Q9DBN4	Q9DBN4	Putative monooxygenase p33MONOX	P33monox	sp|Q9DBN4|P33MX_MOUSE Putative monooxygenase p33MONOX OS=Mus musculus GN=P33monox PE=1 SV=1	2	10.6	0	24331	27119	30999	15949	23607	14587	26903	29626	21617	19714	15645	10978	30497	19971	36986	23469
Q8K0V2	Q8K0V2	DCN1-like protein 3	Dcun1d3	sp|Q8K0V2|DCNL3_MOUSE DCN1-like protein 3 OS=Mus musculus GN=Dcun1d3 PE=2 SV=1	1	5.3	0	28007	23400	35731	14960	32698	11426	29238	27009	30243	26894	15240	8762.9	28730	13476	32880	27411
P59268	P59268	Palmitoyltransferase ZDHHC9	Zdhhc9	sp|P59268|ZDHC9_MOUSE Palmitoyltransferase ZDHHC9 OS=Mus musculus GN=Zdhhc9 PE=2 SV=1	1	3.6	0	23944	29885	35657	15968	15753	19542	26029	27786	21479	14122	15057	21866	22651	22153	33302	26525
Q9R194	Q9R194	Cryptochrome-2	Cry2	sp|Q9R194|CRY2_MOUSE Cryptochrome-2 OS=Mus musculus GN=Cry2 PE=1 SV=1	1	6.1	0	23637	35650	30835	11522	16021	17054	32692	34776	24225	23356	13313	13708	34897	10879	33166	34601
Q8BPY9	Q8BPY9	Fidgetin-like protein 1	Fignl1	sp|Q8BPY9|FIGL1_MOUSE Fidgetin-like protein 1 OS=Mus musculus GN=Fignl1 PE=2 SV=1	2	4.4	0	22663	24511	34124	10643	21224	33337	15016	12183	31511	21317	21201	26068	32338	27567	23728	22500
Q3SXA6	Q3SXA6		Tnip3	tr|Q3SXA6|Q3SXA6_MOUSE Protein Tnip3 OS=Mus musculus GN=Tnip3 PE=2 SV=1	1	9.1	0	18067	28621	32645	16429	27089	20640	26298	24239	25595	24269	12163	11490	26814	25651	29523	28127
Q6NSR3	Q6NSR3	Uncharacterized aarF domain-containing protein kinase 2	Adck2	sp|Q6NSR3|ADCK2_MOUSE Uncharacterized aarF domain-containing protein kinase 2 OS=Mus musculus GN=Adck2 PE=2 SV=1	2	3.6	0	24509	26168	35394	11550	17645	20175	22138	25057	23754	15560	16352	25437	28564	21636	34321	29862
Q9D668	Q9D668	Arrestin domain-containing protein 2	Arrdc2	sp|Q9D668|ARRD2_MOUSE Arrestin domain-containing protein 2 OS=Mus musculus GN=Arrdc2 PE=2 SV=1	1	5.7	0	33680	32268	37636	11916	28877	10840	31265	32263	23877	20309	14292	10852	27812	21995	32151	29240
Q64331	Q64331	Unconventional myosin-VI	Myo6	sp|Q64331|MYO6_MOUSE Unconventional myosin-VI OS=Mus musculus GN=Myo6 PE=1 SV=1	2	2.5	0	25665	25492	31048	8355.5	25695	31224	26377	20778	18608	28420	26308	16828	26291	25441	24135	28834
Q9QZK2	Q9QZK2	Breast cancer anti-estrogen resistance protein 3	Bcar3	sp|Q9QZK2|BCAR3_MOUSE Breast cancer anti-estrogen resistance protein 3 OS=Mus musculus GN=Bcar3 PE=1 SV=1	1	1.7	0	24426	26405	45935	15083	21516	22920	24665	20049	26247	18294	19048	18921	23899	23662	28983	26411
Q8BHT7	Q8BHT7	RAB6A-GEF complex partner protein 2	Rgp1	sp|Q8BHT7|RGP1_MOUSE RAB6A-GEF complex partner protein 2 OS=Mus musculus GN=Rgp1 PE=2 SV=1	3	8.7	0	25044	23475	25813	22180	28751	23282	26377	15598	27469	18865	25241	18755	27989	19724	23574	28311
Q9JLI0	Q9JLI0		Akr1c12	tr|Q9JLI0|Q9JLI0_MOUSE Aldo-keto reductase a OS=Mus musculus GN=Akr1c12 PE=1 SV=1	8	35.6	0	35094	39970	39702	6760.1	29608	18600	29645	22420	29721	31293	15134	10611	31216	20675	26543	25804
Q0VBB0	Q0VBB0	PRELI domain-containing protein 2	Prelid2	sp|Q0VBB0|PRLD2_MOUSE PRELI domain-containing protein 2 OS=Mus musculus GN=Prelid2 PE=2 SV=1	1	9	0	24906	20295	35785	23844	21206	20791	29103	24259	20735	24621	20538	17244	31438	21172	30126	21221
P21845	P21845	Tryptase beta-2	Tpsb2	sp|P21845|TRYB2_MOUSE Tryptase beta-2 OS=Mus musculus GN=Tpsb2 PE=1 SV=2	1	5.4	0	34431	23790	25854	17259	30029	16464	26360	24065	22596	24170	24087	20644	20065	21709	26910	29988
Q99J78	Q99J78	Differentially expressed in FDCP 8	Def8	sp|Q99J78|DEFI8_MOUSE Differentially expressed in FDCP 8 OS=Mus musculus GN=Def8 PE=2 SV=1	1	5.1	0	23572	19396	33555	22737	19420	28473	29170	25988	24541	18604	21324	22343	21018	23482	33451	21351
O35640	O35640	Annexin A8	Anxa8	sp|O35640|ANXA8_MOUSE Annexin A8 OS=Mus musculus GN=Anxa8 PE=2 SV=2	1	4.6	0	22259	22383	33731	19206	16032	33412	35419	22395	24695	27762	24207	19695	17966	19458	28484	25851
O88322	O88322	Nidogen-2	Nid2	sp|O88322|NID2_MOUSE Nidogen-2 OS=Mus musculus GN=Nid2 PE=1 SV=2	2	2.3	0	12912	15796	26152	19840	32562	32493	25312	26748	16109	18604	52938	15336	19793	34660	42202	22600
Q9D244	Q9D244	Ribonuclease K6	Rnase6	sp|Q9D244|RNAS6_MOUSE Ribonuclease K6 OS=Mus musculus GN=Rnase6 PE=1 SV=2	1	9.2	0	13383	18436	37201	27370	22830	35674	19928	26564	21293	19839	20554	21724	22894	26618	32765	30378
A0A075B6A9;A0A075B647;P01738;A0A075B685;A0A0B4J1K2;A0A075B631	A0A075B6A9;A0A075B647;P01738;A0A075B685;A0A0B4J1K2;A0A075B631	T-cell receptor alpha chain V region PHDS58	Trav9n-2;Trav9-2;Trav9d-4;Trav9-4;Trav9n-4	tr|A0A075B6A9|A0A075B6A9_MOUSE Protein Trav9d-2 OS=Mus musculus GN=Trav9n-2 PE=4 SV=1;tr|A0A075B647|A0A075B647_MOUSE Protein Trav9-2 OS=Mus musculus GN=Trav9-2 PE=4 SV=1;sp|P01738|TVA1_MOUSE T-cell receptor alpha chain V region PHDS58 OS=Mus musculus PE=1	3	35.7	0	28127	26750	43677	12846	20109	14293	30025	23537	26664	27833	25050	17043	29360	15390	37855	30656
Q9D8P7	Q9D8P7	General transcription factor 3C polypeptide 6	Gtf3c6	sp|Q9D8P7|TF3C6_MOUSE General transcription factor 3C polypeptide 6 OS=Mus musculus GN=Gtf3c6 PE=2 SV=1	1	16.7	0	14554	22393	34901	18371	28598	21481	31104	30980	22314	22039	20781	19863	26494	21613	35287	34483
Q9D0Y8	Q9D0Y8	39S ribosomal protein L52, mitochondrial	Mrpl52	sp|Q9D0Y8|RM52_MOUSE 39S ribosomal protein L52, mitochondrial OS=Mus musculus GN=Mrpl52 PE=2 SV=1	1	27.3	0	32275	20420	33593	20992	19712	15213	35348	18373	28688	33445	22632	25028	29448	20078	22143	29639
Q9WU20	Q9WU20	Methylenetetrahydrofolate reductase	Mthfr	sp|Q9WU20|MTHR_MOUSE Methylenetetrahydrofolate reductase OS=Mus musculus GN=Mthfr PE=2 SV=2	2	4	0	40108	31376	33040	13373	19356	11061	42437	23480	26329	38590	14172	14533	38759	16966	31152	39638
Q61586	Q61586	Glycerol-3-phosphate acyltransferase 1, mitochondrial	Gpam	sp|Q61586|GPAT1_MOUSE Glycerol-3-phosphate acyltransferase 1, mitochondrial OS=Mus musculus GN=Gpam PE=1 SV=2	2	4	0	23502	23258	36533	30093	27242	23936	30527	25738	12477	15297	21143	31310	28373	28331	32286	19991
B2RS76	B2RS76		Cpb1	tr|B2RS76|B2RS76_MOUSE Carboxypeptidase B1 (Tissue) OS=Mus musculus GN=Cpb1 PE=2 SV=1	3	9.2	0	18802	17027	29885	15903	23245	49655	25396	17876	16367	30316	18044	28232	26172	33900	43150	30598
A2A8L5	A2A8L5	Receptor-type tyrosine-protein phosphatase F	Ptprf	sp|A2A8L5|PTPRF_MOUSE Receptor-type tyrosine-protein phosphatase F OS=Mus musculus GN=Ptprf PE=1 SV=1	1	1.3	0	28584	24743	40885	22387	29573	37069	21539	11642	38263	23210	29845	17337	25543	21975	26963	20240
P14220	P14220	Glycophorin-A	Gypa	sp|P14220|GLPA_MOUSE Glycophorin-A OS=Mus musculus GN=Gypa PE=1 SV=2	1	18.5	0	12798	3545.2	32325	44574	15105	86897	43130	42910	6767.5	15462	32875	30458	13080	63794	48415	40607
Q9D975	Q9D975	Sulfiredoxin-1	Srxn1	sp|Q9D975|SRXN1_MOUSE Sulfiredoxin-1 OS=Mus musculus GN=Srxn1 PE=2 SV=1	1	8.1	0	21644	30311	44290	17414	16725	29506	28404	25940	31117	23293	14366	17151	31363	25776	30666	37178
Q3U1C6	Q3U1C6	Putative deoxyribonuclease TATDN3	Tatdn3	sp|Q3U1C6|TATD3_MOUSE Putative deoxyribonuclease TATDN3 OS=Mus musculus GN=Tatdn3 PE=2 SV=1	1	6.8	0	44061	29773	24088	14585	25548	19605	40246	30130	33636	26453	15165	16254	31578	12232	38774	33846
Q8K558	Q8K558	Trem-like transcript 1 protein	Treml1	sp|Q8K558|TRML1_MOUSE Trem-like transcript 1 protein OS=Mus musculus GN=Treml1 PE=1 SV=2	1	11	0	26580	26379	38745	37503	24352	23324	27382	14584	33829	25297	31420	20317	26558	22776	23030	17851
Q923M0	Q923M0	Protein phosphatase 1 regulatory subunit 16A	Ppp1r16a	sp|Q923M0|PP16A_MOUSE Protein phosphatase 1 regulatory subunit 16A OS=Mus musculus GN=Ppp1r16a PE=1 SV=1	1	2.7	0	29906	34344	32112	15260	20694	27293	40363	24466	22414	22750	24379	12320	29217	18304	34529	43730
Q5EBP3	Q5EBP3	Armadillo repeat-containing protein 5	Armc5	sp|Q5EBP3|ARMC5_MOUSE Armadillo repeat-containing protein 5 OS=Mus musculus GN=Armc5 PE=2 SV=1	1	2.4	0	34359	32608	32545	16487	34396	15291	31615	28089	34216	15314	24479	16628	28305	21780	32560	29299
Q80TA1	Q80TA1	Ethanolaminephosphotransferase 1	Ept1	sp|Q80TA1|EPT1_MOUSE Ethanolaminephosphotransferase 1 OS=Mus musculus GN=Ept1 PE=2 SV=3	1	4	0	22296	27838	31497	21939	29749	20898	29814	14464	30137	20268	19386	28594	31097	25642	40254	29557
Q8CEI3	Q8CEI3		Ccdc28a	tr|Q8CEI3|Q8CEI3_MOUSE Protein Ccdc28a OS=Mus musculus GN=Ccdc28a PE=2 SV=1	1	8.3	0	35965	27689	36000	20474	29818	10945	34965	20394	24995	35765	22011	20029	31450	17802	39442	26669
Q8R092	Q8R092	Uncharacterized protein C1orf43 homolog		sp|Q8R092|CA043_MOUSE Uncharacterized protein C1orf43 homolog OS=Mus musculus PE=2 SV=1	2	10.7	0	32435	27377	42699	17505	28108	20394	31489	18646	26473	17001	25599	23409	36138	28499	35027	19544
Q8K3I9	Q8K3I9	Glucocorticoid-induced transcript 1 protein	Glcci1	sp|Q8K3I9|GLCI1_MOUSE Glucocorticoid-induced transcript 1 protein OS=Mus musculus GN=Glcci1 PE=1 SV=1	1	4.1	0	21039	32767	27368	19621	28477	31611	26427	20202	31416	22057	23602	20191	31753	25167	29795	31717
Q6PFE1	Q6PFE1		Klhl5	tr|Q6PFE1|Q6PFE1_MOUSE Kelch-like 5 (Drosophila), isoform CRA_a OS=Mus musculus GN=Klhl5 PE=2 SV=1	1	2	0	31208	39506	38896	15036	23346	23643	37315	28113	28367	25318	24431	13265	26013	19999	34796	28909
P70257	P70257	Nuclear factor 1 X-type	Nfix	sp|P70257|NFIX_MOUSE Nuclear factor 1 X-type OS=Mus musculus GN=Nfix PE=1 SV=2	4	10	0	21945	21544	37251	16909	29360	22646	33365	29171	26739	26343	25682	16858	32312	20087	38316	35939
Q497J1	Q497J1	Lysoplasmalogenase	Tmem86b	sp|Q497J1|TM86B_MOUSE Lysoplasmalogenase OS=Mus musculus GN=Tmem86b PE=2 SV=1	1	7.5	0	23739	19714	32895	12467	24394	34417	42941	30378	29597	18186	23068	22724	28486	25591	38559	32806
Q8R3A2	Q8R3A2	Cysteine-rich DPF motif domain-containing protein 1	Cdpf1	sp|Q8R3A2|CDPF1_MOUSE Cysteine-rich DPF motif domain-containing protein 1 OS=Mus musculus GN=Cdpf1 PE=3 SV=2	1	20.2	0	38391	31352	32677	17984	26320	12809	27671	24061	25210	37625	21064	14477	33228	26052	35890	43566
Q3TFZ4	Q3TFZ4		Zfp7	tr|Q3TFZ4|Q3TFZ4_MOUSE Protein Zfp7 OS=Mus musculus GN=Zfp7 PE=2 SV=1	2	4.5	0	27341	26484	33341	21704	33651	18317	39125	30790	28743	18322	21625	14698	33609	21453	37947	35044
Q99JP7	Q99JP7	Gamma-glutamyltransferase 7;Gamma-glutamyltransferase 7 heavy chain;Gamma-glutamyltransferase 7 light chain	Ggt7	sp|Q99JP7|GGT7_MOUSE Gamma-glutamyltransferase 7 OS=Mus musculus GN=Ggt7 PE=2 SV=2	1	3	0	33428	27083	25317	23031	26638	25961	25624	23111	17481	19983	32736	24226	33383	25203	34692	36863
Q640N2	Q640N2	ADP-ribosylation factor-like protein 13B	Arl13b	sp|Q640N2|AR13B_MOUSE ADP-ribosylation factor-like protein 13B OS=Mus musculus GN=Arl13b PE=1 SV=2	2	9.1	0	24661	18764	39688	15631	25732	22888	34235	33565	35228	25358	24010	22583	23802	20863	37823	36981
Q5F293	Q5F293		Zbtb4	tr|Q5F293|Q5F293_MOUSE Protein Zbtb4 OS=Mus musculus GN=Zbtb4 PE=4 SV=1	2	3.8	0	29983	22429	31724	12431	29853	20720	41849	32907	34181	24541	24062	20515	33368	27645	32414	23874
Q9WTV6	Q9WTV6	Ubl carboxyl-terminal hydrolase 18	Usp18	sp|Q9WTV6|UBP18_MOUSE Ubl carboxyl-terminal hydrolase 18 OS=Mus musculus GN=Usp18 PE=1 SV=2	1	7.3	0	36704	22649	34833	25449	18137	21453	35319	24821	36542	27857	24538	26927	23949	23377	35757	20467
Q8CF66	Q8CF66	Ragulator complex protein LAMTOR4;Ragulator complex protein LAMTOR4, N-terminally processed	Lamtor4	sp|Q8CF66|LTOR4_MOUSE Ragulator complex protein LAMTOR4 OS=Mus musculus GN=Lamtor4 PE=2 SV=2	1	10.1	0	30793	25082	38929	18188	22283	25970	36224	20939	28912	23080	27640	24946	28310	24175	30277	30333
Q9R0E1	Q9R0E1	Procollagen-lysine,2-oxoglutarate 5-dioxygenase 3	Plod3	sp|Q9R0E1|PLOD3_MOUSE Procollagen-lysine,2-oxoglutarate 5-dioxygenase 3 OS=Mus musculus GN=Plod3 PE=1 SV=1	1	1.9	0	31592	29584	32260	17826	26250	15574	38644	34333	21817	26563	28216	16145	27285	23826	44358	31754
Q9Z1J2	Q9Z1J2	Serine/threonine-protein kinase Nek4	Nek4	sp|Q9Z1J2|NEK4_MOUSE Serine/threonine-protein kinase Nek4 OS=Mus musculus GN=Nek4 PE=1 SV=1	1	1.6	0	25468	24658	33506	23545	30932	25284	35285	31512	31487	18833	18353	21180	33388	27185	37171	21602
Q9ESW8	Q9ESW8	Pyroglutamyl-peptidase 1	Pgpep1	sp|Q9ESW8|PGPI_MOUSE Pyroglutamyl-peptidase 1 OS=Mus musculus GN=Pgpep1 PE=2 SV=1	1	12.9	0	29778	22491	45143	23377	30410	25373	26799	29547	33260	25674	18294	15762	37737	22281	28659	33404
G3X9J0	G3X9J0		Sipa1l3	tr|G3X9J0|G3X9J0_MOUSE MCG122846 OS=Mus musculus GN=Sipa1l3 PE=1 SV=1	2	1.6	0	28099	19912	31871	20307	23483	22772	25686	25634	37912	31212	25600	17311	30327	27584	43412	36530
Q3UV74	Q3UV74	Integrin beta-2-like protein	Itgb2l	sp|Q3UV74|ITB2L_MOUSE Integrin beta-2-like protein OS=Mus musculus GN=Itgb2l PE=1 SV=1	1	2.2	0	25727	27706	29102	27011	22632	31006	26378	18872	37740	31486	25812	20471	28924	34658	31084	23853
E9Q5B4	E9Q5B4		Zscan29	tr|E9Q5B4|E9Q5B4_MOUSE Protein Zscan29 OS=Mus musculus GN=Zscan29 PE=4 SV=1	2	3.8	0	32892	29116	36878	24443	27739	20658	37307	30088	21723	26168	23061	19965	27736	20160	38534	29480
Q8K2J9	Q8K2J9	BTB/POZ domain-containing protein 6	Btbd6	sp|Q8K2J9|BTBD6_MOUSE BTB/POZ domain-containing protein 6 OS=Mus musculus GN=Btbd6 PE=2 SV=2	1	2.7	0	26976	31984	36664	26623	23387	37534	27612	24158	22078	21092	26525	20852	27961	34346	27586	29965
Q91WT8	Q91WT8	RNA-binding protein 47	Rbm47	sp|Q91WT8|RBM47_MOUSE RNA-binding protein 47 OS=Mus musculus GN=Rbm47 PE=2 SV=1	1	3.4	0	31058	36273	33054	15616	31431	10097	50715	35981	34374	40204	15104	13563	34863	21017	42863	39715
Q8BZ20	Q8BZ20	Poly [ADP-ribose] polymerase 12	Parp12	sp|Q8BZ20|PAR12_MOUSE Poly [ADP-ribose] polymerase 12 OS=Mus musculus GN=Parp12 PE=2 SV=3	2	5.9	0	27696	29452	37294	14463	20942	22254	49027	30502	17975	26099	24896	25409	25785	33374	48747	33758
Q8K304	Q8K304	E3 ubiquitin-protein ligase TM129	Tmem129	sp|Q8K304|TM129_MOUSE E3 ubiquitin-protein ligase TM129 OS=Mus musculus GN=Tmem129 PE=2 SV=1	1	5	0	33435	26824	40848	23012	27606	31023	34236	23976	22483	17117	19117	25311	28823	39930	36470	29267
Q9CZ09	Q9CZ09	Histidine protein methyltransferase 1 homolog	Mettl18	sp|Q9CZ09|MET18_MOUSE Histidine protein methyltransferase 1 homolog OS=Mus musculus GN=Mettl18 PE=2 SV=2	3	9.9	0	31424	37033	45215	21399	33665	15059	35892	26961	24099	31389	19443	18662	31073	23334	41585	31088
Q8VDY4	Q8VDY4	EF-hand calcium-binding domain-containing protein 7	Efcab7	sp|Q8VDY4|EFCB7_MOUSE EF-hand calcium-binding domain-containing protein 7 OS=Mus musculus GN=Efcab7 PE=2 SV=1	2	6.1	0	40276	36236	43027	13574	26199	12695	39128	30213	34807	32449	24555	17021	34637	21720	45599	28552
P16390	P16390	Potassium voltage-gated channel subfamily A member 3	Kcna3	sp|P16390|KCNA3_MOUSE Potassium voltage-gated channel subfamily A member 3 OS=Mus musculus GN=Kcna3 PE=2 SV=3	1	2.7	0	32564	40246	39308	19824	24988	22707	40386	27798	26158	32647	16699	17508	33152	17965	47009	34841
Q9CPZ6	Q9CPZ6	ORM1-like protein 3	Ormdl3	sp|Q9CPZ6|ORML3_MOUSE ORM1-like protein 3 OS=Mus musculus GN=Ormdl3 PE=2 SV=1	2	17	0	34061	19921	41384	24581	18071	29663	28399	28912	24097	39147	27869	26844	30056	25299	37320	27520
Q3TT38	Q3TT38	Uncharacterized protein C6orf106 homolog	D17Wsu92e	sp|Q3TT38|CF106_MOUSE Uncharacterized protein C6orf106 homolog OS=Mus musculus GN=D17Wsu92e PE=2 SV=2	2	12	0	26978	31088	33166	26184	31067	16912	28314	21989	33493	26793	21813	26185	32824	27285	46003	34117
Q99KS6	Q99KS6	Manganese-dependent ADP-ribose/CDP-alcohol diphosphatase	Adprm	sp|Q99KS6|ADPRM_MOUSE Manganese-dependent ADP-ribose/CDP-alcohol diphosphatase OS=Mus musculus GN=Adprm PE=2 SV=1	1	6.8	0	56519	51233	37528	11066	24922	15192	45757	41669	39597	43280	18401	6594.1	47888	11749	41551	40841
O09010	O09010	Beta-1,3-N-acetylglucosaminyltransferase lunatic fringe	Lfng	sp|O09010|LFNG_MOUSE Beta-1,3-N-acetylglucosaminyltransferase lunatic fringe OS=Mus musculus GN=Lfng PE=1 SV=1	1	4.2	0	30072	28220	35718	25828	29663	27088	28264	28886	32101	25259	31631	28746	25390	24382	26867	28048
O54839	O54839	Eomesodermin homolog	Eomes	sp|O54839|EOMES_MOUSE Eomesodermin homolog OS=Mus musculus GN=Eomes PE=1 SV=3	1	2.1	0	35992	28647	29913	24171	32295	21266	35119	28512	27492	25849	17419	18993	27370	22734	56605	47499
Q8R2Z5	Q8R2Z5	von Willebrand factor A domain-containing protein 1	Vwa1	sp|Q8R2Z5|VWA1_MOUSE von Willebrand factor A domain-containing protein 1 OS=Mus musculus GN=Vwa1 PE=1 SV=1	1	3.9	0	20239	22946	37612	18626	26765	32795	46179	24948	35060	18371	32497	24621	25377	37418	38312	35059
Q6PDY0	Q6PDY0	Coiled-coil domain-containing protein 85B	Ccdc85b	sp|Q6PDY0|CC85B_MOUSE Coiled-coil domain-containing protein 85B OS=Mus musculus GN=Ccdc85b PE=1 SV=1	1	12.4	0	35302	40931	31641	20337	34797	25784	37057	25054	27096	34961	24140	11360	28715	31099	38455	31653
Q99L20	Q99L20		Gstt3	tr|Q99L20|Q99L20_MOUSE Glutathione S-transferase theta 3 OS=Mus musculus GN=Gstt3 PE=2 SV=1	3	14.1	0	30995	21459	51534	17812	37870	20776	40494	31168	45909	28363	20809	14969	36878	23151	28242	37521
Q61858	Q61858	G patch domain and ankyrin repeat-containing protein 1	Gpank1	sp|Q61858|GPAN1_MOUSE G patch domain and ankyrin repeat-containing protein 1 OS=Mus musculus GN=Gpank1 PE=2 SV=2	1	4.3	0	41590	36275	49003	14002	30878	14464	44594	29830	42204	38293	21133	15353	31606	13861	38129	41320
Q99JB0	Q99JB0	Krueppel-like factor 7	Klf7	sp|Q99JB0|KLF7_MOUSE Krueppel-like factor 7 OS=Mus musculus GN=Klf7 PE=2 SV=1	1	5	0	29133	26689	45104	22761	20028	21206	25091	31916	28502	35708	28668	31393	25837	24372	43891	34018
O09008	O09008	Beta-1,3-N-acetylglucosaminyltransferase manic fringe	Mfng	sp|O09008|MFNG_MOUSE Beta-1,3-N-acetylglucosaminyltransferase manic fringe OS=Mus musculus GN=Mfng PE=1 SV=1	1	4.4	0	41505	29652	29523	29605	22790	19911	35129	31143	37948	27461	30069	27725	27106	18816	33926	29577
O88876	O88876	Short-chain dehydrogenase/reductase 3	Dhrs3	sp|O88876|DHRS3_MOUSE Short-chain dehydrogenase/reductase 3 OS=Mus musculus GN=Dhrs3 PE=2 SV=2	1	4.3	0	30203	33965	36386	32011	17382	31037	24525	29286	31533	22164	21726	28924	28426	31582	36641	40016
E9Q8X5	E9Q8X5		Zbtb10	tr|E9Q8X5|E9Q8X5_MOUSE Protein Zbtb10 OS=Mus musculus GN=Zbtb10 PE=4 SV=1	1	1.7	0	28157	31158	38023	17885	30163	17970	51327	33066	34668	29009	23083	17194	37657	24627	43321	32597
Q9D2R4	Q9D2R4	Transmembrane emp24 domain-containing protein 11	Tmed11	sp|Q9D2R4|TMD11_MOUSE Transmembrane emp24 domain-containing protein 11 OS=Mus musculus GN=Tmed11 PE=2 SV=1	1	7.9	0	11476	11134	36464	59488	22100	209440	30153	11861	9055.1	11656	18221	64050	22367	168200	29332	47637
Q7TPD2	Q7TPD2	Protein FAM185A	Fam185a	sp|Q7TPD2|F185A_MOUSE Protein FAM185A OS=Mus musculus GN=Fam185a PE=2 SV=1	2	11.1	0	30433	30914	38264	25176	31583	33661	31835	23908	27211	26764	24347	34690	33944	28971	27482	29233
Q8BME9	Q8BME9	Cerebellin-4	Cbln4	sp|Q8BME9|CBLN4_MOUSE Cerebellin-4 OS=Mus musculus GN=Cbln4 PE=1 SV=1	1	6.6	0	27845	22422	36268	36520	31555	31885	32677	20973	38471	28287	29590	26670	29022	28940	34935	25142
Q9CUB6	Q9CUB6	OTU domain-containing protein 1	Otud1	sp|Q9CUB6|OTUD1_MOUSE OTU domain-containing protein 1 OS=Mus musculus GN=Otud1 PE=2 SV=2	1	3.5	0	35320	29475	49410	23464	26821	23646	30308	40379	33658	31011	21403	15322	41546	20186	35122	38880
E9Q7D5	E9Q7D5		Arhgef5	tr|E9Q7D5|E9Q7D5_MOUSE Protein Arhgef5 OS=Mus musculus GN=Arhgef5 PE=4 SV=1	2	1.9	0	29048	22774	41109	35027	32761	39087	34902	24892	31087	22757	28126	19072	20467	34945	40908	31832
Q9WVH9	Q9WVH9	Fibulin-5	Fbln5	sp|Q9WVH9|FBLN5_MOUSE Fibulin-5 OS=Mus musculus GN=Fbln5 PE=1 SV=1	1	4	0	29182	33539	32085	23283	37851	30914	30380	30458	32473	23880	30169	21298	27041	26910	41358	35184
A2AQH4	A2AQH4	BCL-6 corepressor-like protein 1	Bcorl1	sp|A2AQH4|BCORL_MOUSE BCL-6 corepressor-like protein 1 OS=Mus musculus GN=Bcorl1 PE=2 SV=1	3	2.9	0	39466	42914	48369	26809	25242	22287	38958	23410	26944	24069	26031	20330	33548	34301	37740	29135
Q8BMI4	Q8BMI4	Flap endonuclease GEN homolog 1	Gen1	sp|Q8BMI4|GEN_MOUSE Flap endonuclease GEN homolog 1 OS=Mus musculus GN=Gen1 PE=2 SV=2	1	2	0	30669	27478	37082	29739	26193	29212	37525	30458	20498	22394	35291	28961	35953	40319	31950	29737
P00683	P00683	Ribonuclease pancreatic	Rnase1	sp|P00683|RNAS1_MOUSE Ribonuclease pancreatic OS=Mus musculus GN=Rnase1 PE=1 SV=2	1	16.8	0	21123	16573	41580	33579	26779	50190	45352	31069	20788	21586	27401	27539	24780	48486	40545	35899
Q4JIM5	Q4JIM5	Abelson tyrosine-protein kinase 2	Abl2	sp|Q4JIM5|ABL2_MOUSE Abelson tyrosine-protein kinase 2 OS=Mus musculus GN=Abl2 PE=1 SV=1	4	4.7	0	39213	33000	43322	17558	33453	20959	45182	33215	35572	31719	28280	14847	43068	19460	47375	31540
O55111	O55111	Desmoglein-2	Dsg2	sp|O55111|DSG2_MOUSE Desmoglein-2 OS=Mus musculus GN=Dsg2 PE=1 SV=3	2	3.1	0	23823	33669	66999	28966	23352	37352	35895	24947	31350	21685	43180	29784	21970	23058	42487	27415
P52194	P52194	Calmegin	Clgn	sp|P52194|CLGN_MOUSE Calmegin OS=Mus musculus GN=Clgn PE=1 SV=2	1	3.6	0	26602	21855	48901	23299	26792	39796	38633	29497	18437	23141	27871	39879	35015	28075	49221	36685
Q8BMA5	Q8BMA5	Protein NPAT	Npat	sp|Q8BMA5|NPAT_MOUSE Protein NPAT OS=Mus musculus GN=Npat PE=2 SV=2	4	4	0	38682	34898	21324	20329	38723	23788	45592	64437	55058	30531	17522	17593	34570	17489	41257	35109
Q8BIF0	Q8BIF0	CD99 antigen-like protein 2	Cd99l2	sp|Q8BIF0|C99L2_MOUSE CD99 antigen-like protein 2 OS=Mus musculus GN=Cd99l2 PE=1 SV=1	1	6.3	0	48576	34295	53294	13222	28942	17679	49308	37385	44942	33326	25366	16142	38455	13884	47001	43377
Q9JI10	Q9JI10	Serine/threonine-protein kinase 3;Serine/threonine-protein kinase 3 36kDa subunit;Serine/threonine-protein kinase 3 20kDa subunit	Stk3	sp|Q9JI10|STK3_MOUSE Serine/threonine-protein kinase 3 OS=Mus musculus GN=Stk3 PE=1 SV=1	9	20.1	0	35439	37280	41332	24606	32036	33138	41583	31049	36884	27626	27801	19075	28930	17652	37522	38973
Q03146	Q03146	Epithelial discoidin domain-containing receptor 1	Ddr1	sp|Q03146|DDR1_MOUSE Epithelial discoidin domain-containing receptor 1 OS=Mus musculus GN=Ddr1 PE=2 SV=2	1	1.1	0	38367	41699	36832	15361	35585	17056	38591	29508	32485	29616	32912	20018	43927	24970	48533	35669
Q5SSN7	Q5SSN7	Vesicle transport protein SFT2A	Sft2d1	sp|Q5SSN7|SFT2A_MOUSE Vesicle transport protein SFT2A OS=Mus musculus GN=Sft2d1 PE=1 SV=1	1	17	0	32344	31637	46500	21344	28453	26950	39383	33796	32883	22231	25469	42738	32543	27640	37050	29034
O70585	O70585	Dystrobrevin beta	Dtnb	sp|O70585|DTNB_MOUSE Dystrobrevin beta OS=Mus musculus GN=Dtnb PE=1 SV=3	1	3.5	0	37041	34909	41735	22542	20485	26245	47381	35860	40772	28229	24614	17506	33204	26931	46918	36281
Q3UU35	Q3UU35	Ovostatin homolog	Ovos	sp|Q3UU35|OVOS_MOUSE Ovostatin homolog OS=Mus musculus GN=Ovos PE=2 SV=2	1	0.7	0	34485	32211	104000	17062	22436	18222	26009	25852	33329	28060	119220	12608	31103	26814	41694	33312
Q8BG55	Q8BG55	Probable G-protein coupled receptor 171	Gpr171	sp|Q8BG55|GP171_MOUSE Probable G-protein coupled receptor 171 OS=Mus musculus GN=Gpr171 PE=2 SV=1	1	5.3	0	34728	33948	30948	24606	36492	27461	48011	27761	42456	33754	21948	18950	28812	24609	44261	39385
Q3TY92	Q3TY92	Methyl-CpG-binding domain protein 6	Mbd6	sp|Q3TY92|MBD6_MOUSE Methyl-CpG-binding domain protein 6 OS=Mus musculus GN=Mbd6 PE=2 SV=2	2	3.7	0	35378	31662	33097	21050	29407	21291	43466	32425	35762	33245	27180	26303	36863	28158	39359	37381
Q9JJW6	Q9JJW6	Aly/REF export factor 2	Alyref2	sp|Q9JJW6|ALRF2_MOUSE Aly/REF export factor 2 OS=Mus musculus GN=Alyref2 PE=1 SV=1	3	18.3	0	43350	37515	47925	16642	25578	25906	47288	33126	32703	39356	20886	13683	39140	24153	48506	40447
A2CE44	A2CE44	Zinc finger X-linked protein ZXDB	Zxdb	sp|A2CE44|ZXDB_MOUSE Zinc finger X-linked protein ZXDB OS=Mus musculus GN=Zxdb PE=2 SV=1	2	6.2	0	36033	31103	47895	24780	29337	22575	35713	21910	28593	37361	30498	28810	46633	28198	40988	27580
Q8R4H2	Q8R4H2	Rho guanine nucleotide exchange factor 12	Arhgef12	sp|Q8R4H2|ARHGC_MOUSE Rho guanine nucleotide exchange factor 12 OS=Mus musculus GN=Arhgef12 PE=1 SV=2	2	2.3	0	33711	30279	39588	26398	38590	28192	36871	24882	31779	31166	23974	17317	30694	37220	45504	42340
Q8VE96	Q8VE96	Solute carrier family 35 member F6	Slc35f6	sp|Q8VE96|S35F6_MOUSE Solute carrier family 35 member F6 OS=Mus musculus GN=Slc35f6 PE=2 SV=1	1	4	0	33648	34914	48231	19023	33560	15396	43273	28187	35033	38803	24625	25072	37291	26348	45563	38341
Q2PZL6	Q2PZL6	Protocadherin Fat 4	Fat4	sp|Q2PZL6|FAT4_MOUSE Protocadherin Fat 4 OS=Mus musculus GN=Fat4 PE=1 SV=2	1	0.4	0	33634	27153	39560	30784	27383	30975	37000	26516	37505	29529	34635	28282	42487	21158	43140	26960
Q99LF1	Q99LF1	Akirin-1	Akirin1	sp|Q99LF1|AKIR1_MOUSE Akirin-1 OS=Mus musculus GN=Akirin1 PE=2 SV=1	1	5.2	0	36824	48906	34922	17978	24831	31376	40251	32054	34789	33332	33049	27614	29438	25766	35712	32679
Q99JW1	Q99JW1	Alpha/beta hydrolase domain-containing protein 17A	Abhd17a	sp|Q99JW1|AB17A_MOUSE Alpha/beta hydrolase domain-containing protein 17A OS=Mus musculus GN=Abhd17a PE=2 SV=1	3	20.3	0	36395	47527	38664	42981	31768	23736	27397	33874	35087	21415	25330	30968	23480	21954	42346	41662
Q505G8	Q505G8	Zinc finger protein 827	Znf827	sp|Q505G8|ZN827_MOUSE Zinc finger protein 827 OS=Mus musculus GN=Znf827 PE=2 SV=2	1	1.5	0	42019	32998	45756	24469	25299	21531	35329	35639	30772	29960	28630	18611	47912	32454	38665	35659
Q00724	Q00724	Retinol-binding protein 4	Rbp4	sp|Q00724|RET4_MOUSE Retinol-binding protein 4 OS=Mus musculus GN=Rbp4 PE=2 SV=2	1	10.9	0	21818	25338	43681	28680	39097	40124	30072	22051	44618	33852	32145	29408	30160	35755	35101	29210
Q8BQS4	Q8BQS4	Protein FAM102B	Fam102b	sp|Q8BQS4|F102B_MOUSE Protein FAM102B OS=Mus musculus GN=Fam102b PE=2 SV=2	1	5.6	0	33877	36071	58800	18142	27227	31596	28996	29913	33878	26092	27774	23631	30533	34467	43738	46206
Q8CJF9	Q8CJF9	Protein argonaute-3	Ago3	sp|Q8CJF9|AGO3_MOUSE Protein argonaute-3 OS=Mus musculus GN=Ago3 PE=2 SV=2	11	16.5	0	31596	35918	43818	21988	42473	15922	70575	48591	37862	22661	18796	13190	31380	19662	70381	51986
P23798	P23798	Polycomb group RING finger protein 2	Pcgf2	sp|P23798|PCGF2_MOUSE Polycomb group RING finger protein 2 OS=Mus musculus GN=Pcgf2 PE=1 SV=2	3	12.3	0	25446	38493	35973	18145	25614	21588	43984	39222	29620	27914	31186	25742	46168	26493	54219	45475
Q8VDW4	Q8VDW4	Ubiquitin-conjugating enzyme E2 W	Ube2w	sp|Q8VDW4|UBE2W_MOUSE Ubiquitin-conjugating enzyme E2 W OS=Mus musculus GN=Ube2w PE=1 SV=1	1	11.9	0	40509	43490	41772	17266	28067	24929	50108	29222	31921	36043	26925	23033	38289	20426	46914	39263
P70445	P70445	Eukaryotic translation initiation factor 4E-binding protein 2	Eif4ebp2	sp|P70445|4EBP2_MOUSE Eukaryotic translation initiation factor 4E-binding protein 2 OS=Mus musculus GN=Eif4ebp2 PE=1 SV=1	1	10.8	0	30792	30064	44051	22282	35579	29524	37746	29652	33056	38849	31681	16597	36467	27452	49640	37388
Q8BID8	Q8BID8	F-box/LRR-repeat protein 14	Fbxl14	sp|Q8BID8|FXL14_MOUSE F-box/LRR-repeat protein 14 OS=Mus musculus GN=Fbxl14 PE=2 SV=1	1	4.8	0	39189	40084	38886	28757	28364	26783	39560	24501	25498	31599	29426	21594	28893	40537	42105	42822
Q9CPU4	Q9CPU4	Microsomal glutathione S-transferase 3	Mgst3	sp|Q9CPU4|MGST3_MOUSE Microsomal glutathione S-transferase 3 OS=Mus musculus GN=Mgst3 PE=1 SV=1	1	14.4	0	22468	26177	53765	24848	30277	45486	40320	32864	30256	15355	35823	45914	37307	28909	40584	30182
Q9QY93	Q9QY93	dCTP pyrophosphatase 1	Dctpp1	sp|Q9QY93|DCTP1_MOUSE dCTP pyrophosphatase 1 OS=Mus musculus GN=Dctpp1 PE=1 SV=1	1	14.1	0	35222	40010	43302	13191	34052	19968	32163	41905	28742	29945	25957	25625	48503	39372	43922	42433
Q6DI86	Q6DI86	FAST kinase domain-containing protein 1	Fastkd1	sp|Q6DI86|FAKD1_MOUSE FAST kinase domain-containing protein 1 OS=Mus musculus GN=Fastkd1 PE=2 SV=1	1	1.4	0	42765	30646	41268	21826	28184	29857	38828	29589	28228	34088	31430	30250	44719	36321	38629	24471
Q8R3P7	Q8R3P7	Clusterin-associated protein 1	Cluap1	sp|Q8R3P7|CLUA1_MOUSE Clusterin-associated protein 1 OS=Mus musculus GN=Cluap1 PE=1 SV=1	1	3.9	0	47196	29811	44157	26169	32486	31053	37802	38070	25524	29775	27841	23299	37071	25062	45681	33661
Q6NS57	Q6NS57	Mitogen-activated protein kinase-binding protein 1	Mapkbp1	sp|Q6NS57|MABP1_MOUSE Mitogen-activated protein kinase-binding protein 1 OS=Mus musculus GN=Mapkbp1 PE=1 SV=1	3	3.9	0	32720	32388	55930	29929	30098	20753	41513	37367	26025	24366	36870	24287	32099	33196	37492	42895
Q9CTG6	Q9CTG6	Probable cation-transporting ATPase 13A2	Atp13a2	sp|Q9CTG6|AT132_MOUSE Probable cation-transporting ATPase 13A2 OS=Mus musculus GN=Atp13a2 PE=2 SV=3	3	6.2	0	24336	10814	35518	48226	30992	66194	37986	27414	15861	15422	35400	47228	51336	52442	44355	36382
Q8BXK4	Q8BXK4	Probable methyltransferase BTM2 homolog		sp|Q8BXK4|BMT2_MOUSE Probable methyltransferase BTM2 homolog OS=Mus musculus PE=2 SV=2	1	3.2	0	35040	33669	30331	28809	40254	22708	39004	29026	35235	38585	26326	24951	36107	26700	49595	37997
Q7TSJ6	Q7TSJ6	Serine/threonine-protein kinase LATS2	Lats2	sp|Q7TSJ6|LATS2_MOUSE Serine/threonine-protein kinase LATS2 OS=Mus musculus GN=Lats2 PE=1 SV=1	3	6.3	0	37252	42066	39765	12922	36405	38519	36034	30674	38444	36047	30984	22882	31635	29479	41261	40023
P55041	P55041	GTP-binding protein GEM	Gem	sp|P55041|GEM_MOUSE GTP-binding protein GEM OS=Mus musculus GN=Gem PE=1 SV=2	2	7.5	0	38170	35720	45883	24858	30208	34968	32810	25771	29299	23238	27870	35928	34807	36420	36335	43310
P52795	P52795	Ephrin-B1	Efnb1	sp|P52795|EFNB1_MOUSE Ephrin-B1 OS=Mus musculus GN=Efnb1 PE=1 SV=1	1	5.2	0	33900	38234	38335	27502	40982	26386	44508	32311	39161	21979	35699	24787	34854	30856	27936	39710
Q8VD57	Q8VD57	Vesicle transport protein SFT2B	Sft2d2	sp|Q8VD57|SFT2B_MOUSE Vesicle transport protein SFT2B OS=Mus musculus GN=Sft2d2 PE=1 SV=1	2	17	0	42622	34746	41190	27899	29470	35346	40413	36998	35438	21567	26777	24987	40669	29835	40150	30552
Q99KL7	Q99KL7	Ras-related protein Rab-28	Rab28	sp|Q99KL7|RAB28_MOUSE Ras-related protein Rab-28 OS=Mus musculus GN=Rab28 PE=2 SV=1	1	8.1	0	35167	29795	33954	22874	30465	28807	49001	39563	41680	37289	27321	24776	35570	25821	42568	35779
A2A884	A2A884	Transcription factor HIVEP3	Hivep3	sp|A2A884|ZEP3_MOUSE Transcription factor HIVEP3 OS=Mus musculus GN=Hivep3 PE=1 SV=1	2	1.5	0	35055	41561	37047	24549	24639	24392	44598	38171	28343	33458	30936	27562	39010	22299	49237	49594
Q8BRK9	Q8BRK9	Alpha-mannosidase 2x	Man2a2	sp|Q8BRK9|MA2A2_MOUSE Alpha-mannosidase 2x OS=Mus musculus GN=Man2a2 PE=2 SV=2	5	6.2	0	33201	37470	54601	28901	25849	34907	29320	32799	28384	29214	32219	22821	42756	38228	41081	34531
Q60805	Q60805	Tyrosine-protein kinase Mer	Mertk	sp|Q60805|MERTK_MOUSE Tyrosine-protein kinase Mer OS=Mus musculus GN=Mertk PE=1 SV=1	2	3.4	0	22820	19825	39306	27779	31998	52422	40362	40507	22191	15016	44145	33474	39093	54972	47543	37117
Q80UN1	Q80UN1	BTB/POZ domain-containing protein KCTD9	Kctd9	sp|Q80UN1|KCTD9_MOUSE BTB/POZ domain-containing protein KCTD9 OS=Mus musculus GN=Kctd9 PE=2 SV=1	1	4.1	0	46247	43960	51578	13489	31511	31962	40982	36606	40441	36110	22613	18409	45361	20657	43910	48700
Q8K2J7	Q8K2J7	RELT-like protein 1	Rell1	sp|Q8K2J7|RELL1_MOUSE RELT-like protein 1 OS=Mus musculus GN=Rell1 PE=2 SV=2	1	14	0	37053	29653	49019	29684	33903	29792	28970	33713	34822	39042	29419	24939	35659	30232	40780	38710
Q8VDV3	Q8VDV3	Guanine nucleotide exchange factor for Rab-3A	Rab3il1	sp|Q8VDV3|R3GEF_MOUSE Guanine nucleotide exchange factor for Rab-3A OS=Mus musculus GN=Rab3il1 PE=2 SV=1	2	5.2	0	21062	13400	44530	28384	21637	72742	44163	42602	20390	20159	32359	29758	36928	57167	60520	50452
Q8BHC7	Q8BHC7	Rhomboid-related protein 4	Rhbdd1	sp|Q8BHC7|RHBL4_MOUSE Rhomboid-related protein 4 OS=Mus musculus GN=Rhbdd1 PE=1 SV=1	1	5.4	0	35975	33960	50656	25307	27514	35845	41664	35772	23564	33006	30199	22056	35790	31117	43670	46919
Q7TQH7	Q7TQH7	Low-density lipoprotein receptor-related protein 10	Lrp10	sp|Q7TQH7|LRP10_MOUSE Low-density lipoprotein receptor-related protein 10 OS=Mus musculus GN=Lrp10 PE=2 SV=2	1	3.5	0	40164	28283	51462	27886	30071	36363	42580	25981	38203	28619	29945	34160	30877	28129	39013	39170
Q6ZWS8;Q2M2N2	Q6ZWS8;Q2M2N2	Speckle-type POZ protein;Speckle-type POZ protein-like	Spop;Spopl	sp|Q6ZWS8|SPOP_MOUSE Speckle-type POZ protein OS=Mus musculus GN=Spop PE=1 SV=1;sp|Q2M2N2|SPOPL_MOUSE Speckle-type POZ protein-like OS=Mus musculus GN=Spopl PE=2 SV=3	1	4	0	36221	32124	46308	29475	33915	31099	45026	33900	39778	24509	32989	36116	32581	28809	33655	34905
P17892	P17892	Pancreatic lipase-related protein 2	Pnliprp2	sp|P17892|LIPR2_MOUSE Pancreatic lipase-related protein 2 OS=Mus musculus GN=Pnliprp2 PE=2 SV=1	1	2.6	0	18095	16182	26471	52439	33279	106130	28792	14076	27801	21060	26366	64478	33545	109210	35485	44440
Q8BIE6	Q8BIE6	FERM domain-containing protein 4A	Frmd4a	sp|Q8BIE6|FRM4A_MOUSE FERM domain-containing protein 4A OS=Mus musculus GN=Frmd4a PE=1 SV=2	2	2.8	0	16973	24654	42655	28117	33668	51607	47060	31233	29659	20340	23879	34279	35742	64774	46076	49824
Q80UI7	Q80UI7		Clec4a1	tr|Q80UI7|Q80UI7_MOUSE C-type lectin domain family 4, member a1 OS=Mus musculus GN=Clec4a1 PE=2 SV=1	1	4.9	0	19275	29087	47296	49583	25090	61166	47299	20469	18888	22103	37042	46782	33780	49905	39870	37390
Q8VCQ3	Q8VCQ3	Nuclear receptor-binding factor 2	Nrbf2	sp|Q8VCQ3|NRBF2_MOUSE Nuclear receptor-binding factor 2 OS=Mus musculus GN=Nrbf2 PE=1 SV=1	3	12.9	0	50672	51417	45288	17818	37780	20304	52606	29712	42869	53995	24438	13415	43724	20088	56838	40449
Q9QXW0	Q9QXW0	F-box/LRR-repeat protein 6	Fbxl6	sp|Q9QXW0|FBXL6_MOUSE F-box/LRR-repeat protein 6 OS=Mus musculus GN=Fbxl6 PE=2 SV=2	1	4.7	0	32786	32586	51359	32813	31645	30487	40286	29104	25937	31864	31988	37413	42876	29987	39309	38971
Q9R257	Q9R257	Heme-binding protein 1	Hebp1	sp|Q9R257|HEBP1_MOUSE Heme-binding protein 1 OS=Mus musculus GN=Hebp1 PE=1 SV=2	1	13.2	0	24780	17684	46538	40432	38514	52812	36786	26801	21796	17520	41560	40591	28258	82626	47600	34343
P11416	P11416	Retinoic acid receptor alpha	Rara	sp|P11416|RARA_MOUSE Retinoic acid receptor alpha OS=Mus musculus GN=Rara PE=1 SV=1	2	5	0	44021	41911	56136	33781	34440	17548	42032	33545	36892	34329	28771	23371	45878	22149	43164	40817
Q99LJ6	Q99LJ6	Glutathione peroxidase 7	Gpx7	sp|Q99LJ6|GPX7_MOUSE Glutathione peroxidase 7 OS=Mus musculus GN=Gpx7 PE=2 SV=1	1	8.1	0	40709	30862	44966	30722	35336	30737	44752	27762	33018	16916	41961	25772	42272	31785	46645	51718
Q5DTW2	Q5DTW2	Scm-like with four MBT domains protein 2	Sfmbt2	sp|Q5DTW2|SMBT2_MOUSE Scm-like with four MBT domains protein 2 OS=Mus musculus GN=Sfmbt2 PE=1 SV=2	1	1.9	0	41093	32862	48042	25607	35049	29959	40779	37869	34855	30515	24791	28808	34185	31768	45551	47346
Q8CGA4	Q8CGA4	Maturin	Mturn	sp|Q8CGA4|MTURN_MOUSE Maturin OS=Mus musculus GN=Mturn PE=2 SV=1	1	9.2	0	45367	39464	40238	22156	43724	19130	51156	46659	39562	40694	27882	14100	45552	22222	60218	44548
P25688	P25688	Uricase	Uox	sp|P25688|URIC_MOUSE Uricase OS=Mus musculus GN=Uox PE=1 SV=2	1	5.6	0	44623	24110	63587	47383	36559	22610	35357	30467	36106	35654	35535	16422	67364	43342	30221	28654
Q505F4	Q505F4		Zfp280b	tr|Q505F4|Q505F4_MOUSE Protein Zfp280b OS=Mus musculus GN=Zfp280b PE=2 SV=1	4	11.8	0	43362	32968	51717	27716	30157	29127	37030	26702	37498	52070	28789	18360	47652	33244	49197	38809
Q99KR8	Q99KR8	Plasma alpha-L-fucosidase	Fuca2	sp|Q99KR8|FUCO2_MOUSE Plasma alpha-L-fucosidase OS=Mus musculus GN=Fuca2 PE=2 SV=1	2	5.6	0	40101	39702	41663	31450	30658	31691	43601	37408	31944	29528	31259	30374	37200	32387	43591	36241
P70270	P70270	DNA repair and recombination protein RAD54-like	Rad54l	sp|P70270|RAD54_MOUSE DNA repair and recombination protein RAD54-like OS=Mus musculus GN=Rad54l PE=1 SV=2	1	1.3	0	37543	32769	44791	30532	38062	35330	35335	26529	34232	39880	28175	35526	35195	40666	34214	41156
Q9D291	Q9D291	Desumoylating isopeptidase 2	Desi2	sp|Q9D291|DESI2_MOUSE Desumoylating isopeptidase 2 OS=Mus musculus GN=Desi2 PE=2 SV=1	2	17.5	0	44720	49923	46121	19148	34544	26144	48606	36139	36374	39411	21513	19817	42481	37449	45269	44337
O70362	O70362	Phosphatidylinositol-glycan-specific phospholipase D	Gpld1	sp|O70362|PHLD_MOUSE Phosphatidylinositol-glycan-specific phospholipase D OS=Mus musculus GN=Gpld1 PE=1 SV=1	1	1.8	0	32174	26549	42886	50422	35566	58236	30232	31271	28160	17158	30068	43715	38594	47442	45388	32050
P97751	P97751	Vasoactive intestinal polypeptide receptor 1	Vipr1	sp|P97751|VIPR1_MOUSE Vasoactive intestinal polypeptide receptor 1 OS=Mus musculus GN=Vipr1 PE=1 SV=3	1	3.7	0	51696	49022	46150	21350	26930	28605	45795	36193	42708	48827	28675	21094	33531	26279	47206	36913
Q8BH97	Q8BH97	Reticulocalbin-3	Rcn3	sp|Q8BH97|RCN3_MOUSE Reticulocalbin-3 OS=Mus musculus GN=Rcn3 PE=2 SV=1	1	4	0	31849	26649	55380	42276	28469	35874	34144	32927	26682	20054	36741	37677	34533	50474	45278	47074
Q8CCK0	Q8CCK0	Core histone macro-H2A.2	H2afy2	sp|Q8CCK0|H2AW_MOUSE Core histone macro-H2A.2 OS=Mus musculus GN=H2afy2 PE=1 SV=3	4	15.1	0	21529	19373	38722	55319	30576	76774	40972	28162	23308	10300	33030	82596	31998	48842	54034	50807
Q9CPU9	Q9CPU9	Probable low affinity copper uptake protein 2	Slc31a2	sp|Q9CPU9|COPT2_MOUSE Probable low affinity copper uptake protein 2 OS=Mus musculus GN=Slc31a2 PE=1 SV=1	1	17.5	0	38838	26279	53235	35581	39064	40157	40028	27007	31959	34747	30471	37315	33019	26864	41734	45010
Q9DB28	Q9DB28	Ribonuclease P/MRP protein subunit POP5	Pop5	sp|Q9DB28|POP5_MOUSE Ribonuclease P/MRP protein subunit POP5 OS=Mus musculus GN=Pop5 PE=2 SV=1	1	14.8	0	43223	34927	66622	22919	41542	25345	52126	33806	34020	37396	27555	19105	44837	32309	38229	45970
Q8CJ78	Q8CJ78	Zinc finger protein 628	Znf628	sp|Q8CJ78|ZN628_MOUSE Zinc finger protein 628 OS=Mus musculus GN=Znf628 PE=2 SV=2	3	5.4	0	33825	48685	46880	34910	26294	28082	52346	39985	44303	25558	28210	30282	37970	24301	40632	49232
Q2VPA6	Q2VPA6	Helicase POLQ-like	Helq	sp|Q2VPA6|HELQ_MOUSE Helicase POLQ-like OS=Mus musculus GN=Helq PE=2 SV=2	1	1.5	0	41275	42423	52193	15409	41995	32837	53921	28418	43047	37273	31578	14960	40952	39839	46123	44903
O70355	O70355	Butyrophilin-like protein 2	Btnl2	sp|O70355|BTNL2_MOUSE Butyrophilin-like protein 2 OS=Mus musculus GN=Btnl2 PE=2 SV=2	1	3.1	0	31417	30006	47063	36518	35521	34594	34928	33598	33439	25990	39584	42798	39994	41888	35251	39065
P34914	P34914	Bifunctional epoxide hydrolase 2;Cytosolic epoxide hydrolase 2;Lipid-phosphate phosphatase	Ephx2	sp|P34914|HYES_MOUSE Bifunctional epoxide hydrolase 2 OS=Mus musculus GN=Ephx2 PE=1 SV=2	2	7.9	0	19767	25029	49319	26940	29507	49102	36844	28443	27159	35727	45490	38766	38577	53628	52874	42947
Q9DBB8	Q9DBB8	Trans-1,2-dihydrobenzene-1,2-diol dehydrogenase	Dhdh	sp|Q9DBB8|DHDH_MOUSE Trans-1,2-dihydrobenzene-1,2-diol dehydrogenase OS=Mus musculus GN=Dhdh PE=2 SV=1	1	3.6	0	49694	40610	42545	17556	44449	22118	46827	42684	54512	40436	34483	22649	43561	19399	59423	32229
A2ACP1	A2ACP1	Tetratricopeptide repeat protein 39A	Ttc39a	sp|A2ACP1|TT39A_MOUSE Tetratricopeptide repeat protein 39A OS=Mus musculus GN=Ttc39a PE=2 SV=1	1	2.2	0	36317	31134	45910	31339	30929	46818	46149	34588	37107	29611	24832	33677	34095	37607	45345	47301
Q6NTA4	Q6NTA4	Ras-related GTP-binding protein B	Rragb	sp|Q6NTA4|RRAGB_MOUSE Ras-related GTP-binding protein B OS=Mus musculus GN=Rragb PE=2 SV=1	7	20.9	0	45954	42104	58948	18633	40875	29045	43214	24137	35131	40807	37799	21162	41146	30604	52235	48675
Q9R1Q8	Q9R1Q8	Transgelin-3	Tagln3	sp|Q9R1Q8|TAGL3_MOUSE Transgelin-3 OS=Mus musculus GN=Tagln3 PE=1 SV=1	3	18.1	0	121390	37857	19904	17827	51419	17678	43955	58807	48730	80933	15805	7086.6	155040	24002	49278	31413
Q7TT79	Q7TT79	Microcephalin	Mcph1	sp|Q7TT79|MCPH1_MOUSE Microcephalin OS=Mus musculus GN=Mcph1 PE=2 SV=1	2	3.6	0	37930	35194	60609	22085	37110	35500	40202	34014	31358	38029	24090	31767	49793	46629	49709	29435
E9PXF8	E9PXF8		Sbf2	tr|E9PXF8|E9PXF8_MOUSE Protein Sbf2 OS=Mus musculus GN=Sbf2 PE=4 SV=1	1	0.7	0	40148	42182	57343	18453	35764	32765	61522	45061	44945	21787	37341	16584	42607	28194	46522	50849
Q8JZV4	Q8JZV4	RNA-binding protein 41	Rbm41	sp|Q8JZV4|RBM41_MOUSE RNA-binding protein 41 OS=Mus musculus GN=Rbm41 PE=2 SV=1	1	3.1	0	43733	46254	50979	14489	32556	34830	54406	38538	35758	46665	25949	24033	43601	30318	47208	50902
Q571B6	Q571B6	WASP homolog-associated protein with actin, membranes and microtubules	Whamm	sp|Q571B6|WHAMM_MOUSE WASP homolog-associated protein with actin, membranes and microtubules OS=Mus musculus GN=Whamm PE=2 SV=2	1	2.8	0	26507	46431	54687	25091	44369	32937	59431	38485	39601	24734	37075	29093	32661	31254	42170	46920
Q8K4Q7	Q8K4Q7	Ceramide kinase	Cerk	sp|Q8K4Q7|CERK1_MOUSE Ceramide kinase OS=Mus musculus GN=Cerk PE=2 SV=2	2	4.9	0	36208	27597	52850	38504	28551	48289	46820	23881	35261	32786	39743	23095	48742	48782	41724	37376
Q3U2I3	Q3U2I3	FTS and Hook-interacting protein	Fam160a2	sp|Q3U2I3|F16A2_MOUSE FTS and Hook-interacting protein OS=Mus musculus GN=Fam160a2 PE=1 SV=2	1	1.7	0	36974	39982	52497	25979	39201	22893	50768	33458	44917	33978	26681	24697	44567	40548	53018	43213
O35298	O35298	Acyloxyacyl hydrolase;Acyloxyacyl hydrolase small subunit;Acyloxyacyl hydrolase large subunit	Aoah	sp|O35298|AOAH_MOUSE Acyloxyacyl hydrolase OS=Mus musculus GN=Aoah PE=2 SV=1	1	3.1	0	40561	35509	47878	18842	37754	31324	43474	48228	35225	27897	28159	30905	51047	34891	56962	52719
O54714	O54714	E3 SUMO-protein ligase PIAS3	Pias3	sp|O54714|PIAS3_MOUSE E3 SUMO-protein ligase PIAS3 OS=Mus musculus GN=Pias3 PE=1 SV=3	2	3.5	0	41154	37028	47621	28705	40787	37779	46848	37971	43234	33901	25369	30312	41348	35669	42584	36809
Q3U687	Q3U687		2010002M12Rik	tr|Q3U687|Q3U687_MOUSE Protein 2010002M12Rik OS=Mus musculus GN=2010002M12Rik PE=2 SV=1	6	14.2	0	44514	40470	53813	26565	39596	37891	47262	46245	30436	41155	24755	20397	42814	31066	55153	40830
Q8BGS1	Q8BGS1	Band 4.1-like protein 5	Epb41l5	sp|Q8BGS1|E41L5_MOUSE Band 4.1-like protein 5 OS=Mus musculus GN=Epb41l5 PE=1 SV=1	2	5.1	0	43269	38620	53243	19281	33598	37154	52548	28359	34043	29393	42803	27683	46816	54815	48767	39012
Q8K1A0	Q8K1A0	Methyltransferase-like protein 5	Mettl5	sp|Q8K1A0|METL5_MOUSE Methyltransferase-like protein 5 OS=Mus musculus GN=Mettl5 PE=2 SV=2	1	6.7	0	49121	40740	45693	25593	32810	31024	44147	35313	40949	34333	38952	26786	50511	29121	50552	45649
Q9QXY1	Q9QXY1	Tight junction protein ZO-3	Tjp3	sp|Q9QXY1|ZO3_MOUSE Tight junction protein ZO-3 OS=Mus musculus GN=Tjp3 PE=1 SV=1	2	2.8	0	35655	47827	49641	25644	34583	32121	36414	48584	49870	36865	28886	29860	40912	27048	59967	41777
Q6GQV7	Q6GQV7	Erythroid differentiation-related factor 1	Edrf1	sp|Q6GQV7|EDRF1_MOUSE Erythroid differentiation-related factor 1 OS=Mus musculus GN=Edrf1 PE=2 SV=1	1	1.1	0	47067	38178	52133	22087	31699	34751	39568	35372	40565	31126	34893	28474	46632	45878	51390	43493
Q3UIL6	Q3UIL6	Pleckstrin homology domain-containing family A member 7	Plekha7	sp|Q3UIL6|PKHA7_MOUSE Pleckstrin homology domain-containing family A member 7 OS=Mus musculus GN=Plekha7 PE=1 SV=2	4	6.1	0	49486	37922	49557	24523	43510	24981	51897	43530	39539	37463	28534	18069	45866	36288	56013	49264
Q9CR95	Q9CR95	Adaptin ear-binding coat-associated protein 1	Necap1	sp|Q9CR95|NECP1_MOUSE Adaptin ear-binding coat-associated protein 1 OS=Mus musculus GN=Necap1 PE=1 SV=2	1	9.8	0	51232	52914	45978	17337	42036	27059	47876	44748	47886	47272	28637	19327	54264	24205	54912	42614
O08580	O08580	Steroid hormone receptor ERR1	Esrra	sp|O08580|ERR1_MOUSE Steroid hormone receptor ERR1 OS=Mus musculus GN=Esrra PE=1 SV=4	1	3.1	0	37426	35859	54137	30697	46857	32126	48913	32723	31110	28926	32547	40548	51492	33333	58665	31792
Q9R008	Q9R008	Mevalonate kinase	Mvk	sp|Q9R008|KIME_MOUSE Mevalonate kinase OS=Mus musculus GN=Mvk PE=2 SV=1	5	18.5	0	66543	45653	48293	13633	42311	25495	69567	36479	50025	39457	27245	20029	43323	23103	57090	60684
Q9CY25	Q9CY25	Protein MIS12 homolog	Mis12	sp|Q9CY25|MIS12_MOUSE Protein MIS12 homolog OS=Mus musculus GN=Mis12 PE=2 SV=1	2	16	0	45986	32076	65402	25605	30793	42199	42753	39303	34036	31315	33032	34176	38130	42777	48821	39763
Q8BKR5	Q8BKR5	Protein phosphatase 1 regulatory subunit 37	Ppp1r37	sp|Q8BKR5|PPR37_MOUSE Protein phosphatase 1 regulatory subunit 37 OS=Mus musculus GN=Ppp1r37 PE=2 SV=1	3	6.5	0	55912	46517	45341	22128	48110	25697	60517	31485	43948	26073	40213	27760	49657	27980	46528	47243
Q91W78	Q91W78	U6 snRNA phosphodiesterase	Usb1	sp|Q91W78|USB1_MOUSE U6 snRNA phosphodiesterase OS=Mus musculus GN=Usb1 PE=2 SV=1	1	9	0	46171	46360	62252	24471	30741	25908	54105	47207	45644	37751	24956	16400	51386	30054	64670	53613
Q6NV72	Q6NV72	WD repeat and coiled-coil-containing protein C2orf44 homolog		sp|Q6NV72|CB044_MOUSE WD repeat and coiled-coil-containing protein C2orf44 homolog OS=Mus musculus PE=2 SV=2	3	8.4	0	48382	46430	49656	26497	34055	31357	44714	41810	42773	32082	33168	27658	45884	31612	49024	47435
E0CZ26	E0CZ26		Kctd18	tr|E0CZ26|E0CZ26_MOUSE Potassium channel tetramerisation domain containing 18, isoform CRA_a OS=Mus musculus GN=Kctd18 PE=4 SV=1	1	3.5	0	43931	36518	53606	35979	28660	42214	42070	48022	40139	47779	33236	22677	47934	30709	46632	36061
Q2KHI9	Q2KHI9	DNA helicase MCM9	Mcm9	sp|Q2KHI9|MCM9_MOUSE DNA helicase MCM9 OS=Mus musculus GN=Mcm9 PE=1 SV=2	1	1.1	0	40121	35903	58187	30939	36379	27209	48367	34275	37461	38366	43550	34375	46868	40457	45068	35137
Q8CDB0	Q8CDB0	MAP kinase-interacting serine/threonine-protein kinase 2	Mknk2	sp|Q8CDB0|MKNK2_MOUSE MAP kinase-interacting serine/threonine-protein kinase 2 OS=Mus musculus GN=Mknk2 PE=1 SV=3	1	2.4	0	51516	41145	55608	26009	40126	42583	48844	25605	38863	34974	28911	26027	51466	35718	44100	52657
Q3UI66	Q3UI66	Coiled-coil domain-containing protein 34	Ccdc34	sp|Q3UI66|CCD34_MOUSE Coiled-coil domain-containing protein 34 OS=Mus musculus GN=Ccdc34 PE=2 SV=1	1	3	0	42922	33290	51075	28696	38453	30605	43972	39581	41270	37144	37145	29271	46679	37736	48442	50662
Q8BND4	Q8BND4	Protein DDX26B	Ddx26b	sp|Q8BND4|DX26B_MOUSE Protein DDX26B OS=Mus musculus GN=Ddx26b PE=2 SV=1	8	13.6	0	35926	35559	61781	30015	32000	42250	64731	37025	32027	46357	48338	22798	33492	31540	64107	40084
Q8BH44	Q8BH44	Coronin-2B	Coro2b	sp|Q8BH44|COR2B_MOUSE Coronin-2B OS=Mus musculus GN=Coro2b PE=2 SV=2	1	2.7	0	43985	43203	63311	23663	31537	34309	55649	42252	48783	34066	33746	27280	38974	28887	59699	47973
Q8BK03	Q8BK03	Protein FAM73B	Fam73b	sp|Q8BK03|FA73B_MOUSE Protein FAM73B OS=Mus musculus GN=Fam73b PE=1 SV=1	1	2.5	0	45558	38534	48241	34138	39472	38819	47785	42297	26543	41273	41844	34004	31695	41628	43377	45439
Q9CR83	Q9CR83	Probable RNA-binding protein 18	Rbm18	sp|Q9CR83|RBM18_MOUSE Probable RNA-binding protein 18 OS=Mus musculus GN=Rbm18 PE=2 SV=1	2	19.5	0	44345	32132	54805	29231	39632	31007	51497	37622	39080	48001	33332	21051	47611	31400	64401	54910
Q14BV6	Q14BV6	Carbohydrate deacetylase	Ydjc	sp|Q14BV6|YDJC_MOUSE Carbohydrate deacetylase OS=Mus musculus GN=Ydjc PE=2 SV=2	3	14.8	0	35995	43426	45092	31891	39568	38398	37194	41536	44662	43321	34829	25076	44196	43801	57600	39929
Q91XF4	Q91XF4	E3 ubiquitin-protein ligase RNF167	Rnf167	sp|Q91XF4|RN167_MOUSE E3 ubiquitin-protein ligase RNF167 OS=Mus musculus GN=Rnf167 PE=2 SV=1	1	5.5	0	42367	38883	60923	24143	40401	46476	40442	30836	36451	47215	36899	38399	38232	39388	43363	47579
P97326	P97326	Cadherin-6	Cdh6	sp|P97326|CADH6_MOUSE Cadherin-6 OS=Mus musculus GN=Cdh6 PE=1 SV=2	1	3.2	0	45845	33859	53929	41686	54305	34367	34000	40228	43645	50334	41124	23824	56313	26357	34701	44973
Q8BPX9	Q8BPX9	Solute carrier family 15 member 3	Slc15a3	sp|Q8BPX9|S15A3_MOUSE Solute carrier family 15 member 3 OS=Mus musculus GN=Slc15a3 PE=2 SV=1	1	3.5	0	33388	28756	48279	39063	39886	50681	59910	30392	33042	33069	32565	60867	43379	37695	47422	44936
Q8BZN4	Q8BZN4	NUAK family SNF1-like kinase 2	Nuak2	sp|Q8BZN4|NUAK2_MOUSE NUAK family SNF1-like kinase 2 OS=Mus musculus GN=Nuak2 PE=1 SV=2	1	2	0	34190	34134	47843	48098	41343	42588	37097	36740	40615	33868	38014	42834	43628	41576	50519	42259
Q61017	Q61017	Guanine nucleotide-binding protein G(I)/G(S)/G(O) subunit gamma-T2	Gngt2	sp|Q61017|GBGT2_MOUSE Guanine nucleotide-binding protein G(I)/G(S)/G(O) subunit gamma-T2 OS=Mus musculus GN=Gngt2 PE=3 SV=2	1	20.3	0	39261	39473	56840	27149	34541	38714	55986	38141	41721	43279	30590	30207	45550	39291	54955	51666
Q9DCP9	Q9DCP9	DAZ-associated protein 2	Dazap2	sp|Q9DCP9|DAZP2_MOUSE DAZ-associated protein 2 OS=Mus musculus GN=Dazap2 PE=1 SV=1	1	22	0	61913	46515	50996	27635	27956	29787	61514	40408	46061	44730	31563	25655	45909	30399	53143	57138
Q9DB32	Q9DB32	Hydroxyacylglutathione hydrolase-like protein	Haghl	sp|Q9DB32|HAGHL_MOUSE Hydroxyacylglutathione hydrolase-like protein OS=Mus musculus GN=Haghl PE=2 SV=1	1	7.1	0	56256	56263	45923	18313	51328	19745	58537	62122	57764	39917	31164	21099	49301	36707	51335	44377
A0A075B5K9	A0A075B5K9		Igkv12-98	tr|A0A075B5K9|A0A075B5K9_MOUSE Protein Igkv12-98 OS=Mus musculus GN=Igkv12-98 PE=4 SV=3	1	16.7	0	38924	40665	49051	20742	42906	38142	55757	55317	48017	35350	32156	27442	41200	32351	71704	58009
Q60963	Q60963	Platelet-activating factor acetylhydrolase	Pla2g7	sp|Q60963|PAFA_MOUSE Platelet-activating factor acetylhydrolase OS=Mus musculus GN=Pla2g7 PE=2 SV=2	1	3.2	0	23516	25731	55199	36143	35557	72629	45983	44584	27904	36581	27529	39492	36668	81682	58882	57460
Q91YY4	Q91YY4	ATP synthase mitochondrial F1 complex assembly factor 2	Atpaf2	sp|Q91YY4|ATPF2_MOUSE ATP synthase mitochondrial F1 complex assembly factor 2 OS=Mus musculus GN=Atpaf2 PE=1 SV=1	3	14.9	0	43662	50489	68458	32939	32592	50192	38160	38775	33368	29186	40511	46191	38440	41036	49335	42514
O88188	O88188	Lymphocyte antigen 86	Ly86	sp|O88188|LY86_MOUSE Lymphocyte antigen 86 OS=Mus musculus GN=Ly86 PE=1 SV=1	1	19.1	0	37339	21495	46415	47421	46699	76243	35184	38277	27918	17128	49530	63188	56966	58942	47229	38153
O70309	O70309	Integrin beta-5	Itgb5	sp|O70309|ITB5_MOUSE Integrin beta-5 OS=Mus musculus GN=Itgb5 PE=1 SV=2	3	7.5	0	29094	39838	48065	39781	43692	56931	48058	45495	41422	29541	37180	34236	32679	57393	52459	42190
Q80W04	Q80W04	Transmembrane and coiled-coil domains protein 2	Tmcc2	sp|Q80W04|TMCC2_MOUSE Transmembrane and coiled-coil domains protein 2 OS=Mus musculus GN=Tmcc2 PE=1 SV=1	4	7.9	0	36646	31448	56804	30336	33162	52108	41780	44095	47190	32314	41626	35564	41619	48829	53708	52608
Q8CGN5	Q8CGN5	Perilipin-1	Plin1	sp|Q8CGN5|PLIN1_MOUSE Perilipin-1 OS=Mus musculus GN=Plin1 PE=1 SV=2	1	2.9	0	41701	34942	55386	37934	42218	84166	34636	24313	40312	30835	56635	43235	38912	62993	38211	31694
Q8CFH6	Q8CFH6	Serine/threonine-protein kinase SIK2	Sik2	sp|Q8CFH6|SIK2_MOUSE Serine/threonine-protein kinase SIK2 OS=Mus musculus GN=Sik2 PE=1 SV=1	1	1.3	0	52674	40724	45720	21549	50606	37988	45795	42157	58564	40926	37924	26387	48821	38549	48894	49311
Q0KL01	Q0KL01	UBX domain-containing protein 2B	Ubxn2b	sp|Q0KL01|UBX2B_MOUSE UBX domain-containing protein 2B OS=Mus musculus GN=Ubxn2b PE=1 SV=2	1	6.3	0	60447	48572	43314	26587	44439	26608	66345	53210	53138	33741	30913	20295	46010	28254	58078	71285
P40645;P35710	P40645;P35710	Transcription factor SOX-6;Transcription factor SOX-5	Sox6;Sox5	sp|P40645|SOX6_MOUSE Transcription factor SOX-6 OS=Mus musculus GN=Sox6 PE=1 SV=2;sp|P35710|SOX5_MOUSE Transcription factor SOX-5 OS=Mus musculus GN=Sox5 PE=1 SV=2	2	2.8	0	28933	24848	50090	41854	23221	87533	55658	42657	27312	16664	60875	40749	25829	105170	61589	63592
Q8BK62	Q8BK62	Olfactomedin-like protein 3	Olfml3	sp|Q8BK62|OLFL3_MOUSE Olfactomedin-like protein 3 OS=Mus musculus GN=Olfml3 PE=2 SV=2	1	4.4	0	38558	44788	57548	43646	40061	54339	44057	37559	43413	45084	33786	27742	40484	36094	44212	47557
Q9D3X5	Q9D3X5	PACRG-like protein	Pacrgl	sp|Q9D3X5|PACRL_MOUSE PACRG-like protein OS=Mus musculus GN=Pacrgl PE=2 SV=1	1	3.6	0	44940	52090	52745	36374	29736	40362	45075	42657	42574	30535	28672	32648	65242	39229	55148	52527
P28738	P28738	Kinesin heavy chain isoform 5C	Kif5c	sp|P28738|KIF5C_MOUSE Kinesin heavy chain isoform 5C OS=Mus musculus GN=Kif5c PE=1 SV=3	10	12.9	0	57671	48232	58894	24557	37822	24534	52302	48884	48086	41353	33487	28240	52205	26956	62841	60960
Q8R5F8	Q8R5F8	Epidermal growth factor receptor kinase substrate 8-like protein 1	Eps8l1	sp|Q8R5F8|ES8L1_MOUSE Epidermal growth factor receptor kinase substrate 8-like protein 1 OS=Mus musculus GN=Eps8l1 PE=1 SV=1	1	1.8	0	49587	37283	67306	32563	30474	24927	60951	60183	37072	24212	52162	24789	51096	26457	80047	70987
Q5NCB2	Q5NCB2		Gm12185	tr|Q5NCB2|Q5NCB2_MOUSE Protein Gm12185 OS=Mus musculus GN=Gm12185 PE=4 SV=1	12	18.1	0	46436	52630	56575	13099	44497	32332	65769	48821	65337	45503	30957	20176	44079	34898	77608	54847
Q8C5X1	Q8C5X1		4931406P16Rik	tr|Q8C5X1|Q8C5X1_MOUSE Protein 4931406P16Rik OS=Mus musculus GN=4931406P16Rik PE=1 SV=1	1	2	0	45694	47431	45805	29963	39183	43995	59275	37231	34425	48737	46349	24791	47351	37654	52710	50722
Q3U2K0	Q3U2K0	Protein FAM193B	Fam193b	sp|Q3U2K0|F193B_MOUSE Protein FAM193B OS=Mus musculus GN=Fam193b PE=2 SV=2	3	7.7	0	59581	53200	61821	23877	41344	28737	55763	49656	43240	34489	32897	23583	53110	41807	60319	50314
P48379	P48379	DNA-binding protein RFX2	Rfx2	sp|P48379|RFX2_MOUSE DNA-binding protein RFX2 OS=Mus musculus GN=Rfx2 PE=2 SV=2	2	4.9	0	48825	38311	60098	25484	39374	42884	59807	45301	37011	35337	34454	32036	58775	42433	56424	45279
O35973	O35973	Period circadian protein homolog 1	Per1	sp|O35973|PER1_MOUSE Period circadian protein homolog 1 OS=Mus musculus GN=Per1 PE=1 SV=2	4	5.3	0	53056	54610	63376	20552	39533	43721	46406	35048	45869	43241	39423	23650	51500	48263	49448	50395
Q9D3G5	Q9D3G5	Syntaxin-11	Stx11	sp|Q9D3G5|STX11_MOUSE Syntaxin-11 OS=Mus musculus GN=Stx11 PE=2 SV=1	1	5.2	0	53284	26502	48553	27361	36959	47812	54675	44345	49288	47757	36239	33401	49825	37660	56856	51846
Q80WM9	Q80WM9		Tnfrsf14	tr|Q80WM9|Q80WM9_MOUSE Protein Tnfrsf14 OS=Mus musculus GN=Tnfrsf14 PE=2 SV=1	2	16	0	55210	57410	63407	26822	35698	35700	55372	42090	28346	45509	36555	31496	46837	28657	68735	57924
P70284	P70284	Homeobox protein TGIF1	Tgif1	sp|P70284|TGIF1_MOUSE Homeobox protein TGIF1 OS=Mus musculus GN=Tgif1 PE=2 SV=2	1	5.1	0	48916	55996	50257	27162	46622	23672	47871	41822	43012	49952	34871	30116	57598	33984	63375	56315
E9PWL0;D3YVI9	E9PWL0		Trim30d	tr|E9PWL0|E9PWL0_MOUSE Protein Trim30d OS=Mus musculus GN=Trim30d PE=4 SV=1	6	13.5	0	55430	57307	56068	20002	37070	42339	53545	42112	56630	44553	29694	27098	40473	34081	62192	59870
Q8BMD5	Q8BMD5	Cytidine and dCMP deaminase domain-containing protein 1	Cdadc1	sp|Q8BMD5|CDAC1_MOUSE Cytidine and dCMP deaminase domain-containing protein 1 OS=Mus musculus GN=Cdadc1 PE=2 SV=1	2	6.5	0	60049	47014	58430	24292	43235	32844	52461	40911	44267	44319	40946	26631	48899	35059	59080	50830
Q8BJW7	Q8BJW7	Crossover junction endonuclease EME1	Eme1	sp|Q8BJW7|EME1_MOUSE Crossover junction endonuclease EME1 OS=Mus musculus GN=Eme1 PE=1 SV=1	2	4.9	0	46558	41732	64363	32242	42766	46659	61077	48482	35672	32212	30021	34071	44659	45003	55697	43525
O35516	O35516	Neurogenic locus notch homolog protein 2;Notch 2 extracellular truncation;Notch 2 intracellular domain	Notch2	sp|O35516|NOTC2_MOUSE Neurogenic locus notch homolog protein 2 OS=Mus musculus GN=Notch2 PE=1 SV=1	3	1.7	0	58265	41974	71530	40499	35634	37889	47880	36475	43721	32557	44457	37257	49631	34854	47080	43362
Q9DCJ9	Q9DCJ9	N-acetylneuraminate lyase	Npl	sp|Q9DCJ9|NPL_MOUSE N-acetylneuraminate lyase OS=Mus musculus GN=Npl PE=1 SV=1	3	13.4	0	58367	55207	48067	30680	38247	42828	60026	48979	41799	31767	36182	19655	46658	49973	57956	47811
P06876	P06876	Transcriptional activator Myb	Myb	sp|P06876|MYB_MOUSE Transcriptional activator Myb OS=Mus musculus GN=Myb PE=1 SV=2	1	1.9	0	58463	38140	55177	26563	32581	40663	48626	38062	48063	41733	36214	32339	56055	44156	61854	50202
Q9EP71	Q9EP71	Ankycorbin	Rai14	sp|Q9EP71|RAI14_MOUSE Ankycorbin OS=Mus musculus GN=Rai14 PE=1 SV=1	1	1.5	0	36952	35677	60376	44399	33920	45678	56485	37813	30681	30369	51589	44425	32287	53045	60829	56346
Q61001	Q61001	Laminin subunit alpha-5	Lama5	sp|Q61001|LAMA5_MOUSE Laminin subunit alpha-5 OS=Mus musculus GN=Lama5 PE=1 SV=4	1	0.7	0	43885	38111	48043	36792	33033	54643	80511	48973	22281	20482	64811	29603	41823	41647	74006	69311
Q9D1H9	Q9D1H9	Microfibril-associated glycoprotein 4	Mfap4	sp|Q9D1H9|MFAP4_MOUSE Microfibril-associated glycoprotein 4 OS=Mus musculus GN=Mfap4 PE=1 SV=1	1	10.1	0	32421	27144	52801	48629	34376	62610	35325	40555	37274	25947	43168	52843	33163	88414	61413	61535
Q5HZH2	Q5HZH2	Ribosome biogenesis protein TSR3 homolog	Tsr3	sp|Q5HZH2|TSR3_MOUSE Ribosome biogenesis protein TSR3 homolog OS=Mus musculus GN=Tsr3 PE=2 SV=1	3	12.7	0	57709	56980	78433	24605	39092	29051	64232	42344	45295	38300	29133	30317	45621	49421	49297	51780
P15208	P15208	Insulin receptor;Insulin receptor subunit alpha;Insulin receptor subunit beta	Insr	sp|P15208|INSR_MOUSE Insulin receptor OS=Mus musculus GN=Insr PE=1 SV=2	3	2.9	0	38002	47938	60028	46770	32944	40630	44510	34816	51669	45374	48981	42648	42930	42219	43419	48019
O55060	O55060	Thiopurine S-methyltransferase	Tpmt	sp|O55060|TPMT_MOUSE Thiopurine S-methyltransferase OS=Mus musculus GN=Tpmt PE=1 SV=1	1	4.2	0	66511	48208	67197	29755	42934	28290	61279	46705	47081	70308	33302	15984	50195	32480	62965	49119
Q5S006	Q5S006	Leucine-rich repeat serine/threonine-protein kinase 2	Lrrk2	sp|Q5S006|LRRK2_MOUSE Leucine-rich repeat serine/threonine-protein kinase 2 OS=Mus musculus GN=Lrrk2 PE=1 SV=2	2	0.9	0	55009	34031	55992	34424	32942	44783	48620	44731	46225	41756	39064	31736	53254	53390	53474	50082
Q6PFD7	Q6PFD7	Nuclear apoptosis-inducing factor 1	Naif1	sp|Q6PFD7|NAIF1_MOUSE Nuclear apoptosis-inducing factor 1 OS=Mus musculus GN=Naif1 PE=2 SV=1	1	13.5	0	41562	36542	58788	42963	38311	29346	55567	42937	48589	37987	41109	43827	44079	56319	54213	47307
Q6IE82	Q6IE82	Protein Jade-3	Jade3	sp|Q6IE82|JADE3_MOUSE Protein Jade-3 OS=Mus musculus GN=Jade3 PE=1 SV=1	3	5.1	0	51361	47830	65707	26334	44558	46788	51834	48134	50629	34428	34897	28719	48383	48719	54692	46611
Q9R2B6	Q9R2B6	Alpha-N-acetyl-neuraminyl-2,3-beta-galactosyl-1,3-N-acetyl-galactosaminide alpha-2,6-sialyltransferase	St6galnac4	sp|Q9R2B6|SIA7D_MOUSE Alpha-N-acetyl-neuraminyl-2,3-beta-galactosyl-1,3-N-acetyl-galactosaminide alpha-2,6-sialyltransferase OS=Mus musculus GN=St6galnac4 PE=1 SV=1	1	4.4	0	50480	38870	50148	36116	44701	48975	51460	36803	36967	38735	44268	48394	54155	41119	47824	48253
Q9DB98	Q9DB98	Leukocyte receptor cluster member 1 homolog	Leng1	sp|Q9DB98|LENG1_MOUSE Leukocyte receptor cluster member 1 homolog OS=Mus musculus GN=Leng1 PE=2 SV=1	2	12.6	0	56640	41690	61111	32638	47251	34505	54768	48930	54951	47307	31914	23625	46364	48043	62785	47119
Q8VEB2	Q8VEB2	Protein salvador homolog 1	Sav1	sp|Q8VEB2|SAV1_MOUSE Protein salvador homolog 1 OS=Mus musculus GN=Sav1 PE=1 SV=2	1	6.2	0	57968	43048	51215	32780	38072	30164	61829	49169	47661	35298	34318	33090	44161	60747	69349	54339
Q6P539	Q6P539	Protein FAM222B	Fam222b	sp|Q6P539|F222B_MOUSE Protein FAM222B OS=Mus musculus GN=Fam222b PE=2 SV=2	2	9.3	0	57768	36341	76023	34483	43249	51971	45474	28783	37420	37775	47626	47568	51315	52616	48860	42686
Q80TE4	Q80TE4	Signal-induced proliferation-associated 1-like protein 2	Sipa1l2	sp|Q80TE4|SI1L2_MOUSE Signal-induced proliferation-associated 1-like protein 2 OS=Mus musculus GN=Sipa1l2 PE=1 SV=3	3	3.4	0	40860	34210	61211	38287	33682	47439	59869	35643	49631	42051	46019	47320	38622	54332	54768	51066
O54940	O54940	BCL2/adenovirus E1B 19 kDa protein-interacting protein 2	Bnip2	sp|O54940|BNIP2_MOUSE BCL2/adenovirus E1B 19 kDa protein-interacting protein 2 OS=Mus musculus GN=Bnip2 PE=1 SV=2	1	3.7	0	54802	57123	55594	23546	43121	24004	64104	53153	49106	59616	30753	18352	58754	39521	77474	72393
Q07243	Q07243	Metal regulatory transcription factor 1	Mtf1	sp|Q07243|MTF1_MOUSE Metal regulatory transcription factor 1 OS=Mus musculus GN=Mtf1 PE=1 SV=2	2	5.2	0	63680	52514	47545	26995	45530	33362	59857	52534	44467	41179	41966	21933	59151	37699	65382	61862
Q6NS86	Q6NS86		Zfp366	tr|Q6NS86|Q6NS86_MOUSE Protein Zfp366 OS=Mus musculus GN=Zfp366 PE=2 SV=1	1	1.7	0	44889	48329	72180	30591	45630	31185	57557	51712	41901	35878	38197	46309	41783	51960	58694	45752
Q9Z2D3	Q9Z2D3	Non-syndromic hearing impairment protein 5 homolog	Dfna5	sp|Q9Z2D3|DFNA5_MOUSE Non-syndromic hearing impairment protein 5 homolog OS=Mus musculus GN=Dfna5 PE=2 SV=1	1	2.7	0	41904	48485	49553	28583	40410	33552	60289	43841	65563	57144	34845	22905	63680	54079	59962	50291
Q99JP6	Q99JP6	Homer protein homolog 3	Homer3	sp|Q99JP6|HOME3_MOUSE Homer protein homolog 3 OS=Mus musculus GN=Homer3 PE=1 SV=2	1	5.9	0	58814	48481	53278	25117	46264	33341	68314	51553	63881	45245	37319	24193	50755	37342	69353	46227
Q8C9M8	Q8C9M8		Zfp446	tr|Q8C9M8|Q8C9M8_MOUSE Protein Zfp446 OS=Mus musculus GN=Zfp446 PE=2 SV=1	1	2.3	0	48765	42372	63048	53203	41984	43214	37297	34206	35626	47963	39073	42600	55096	51575	55529	46508
Q9CQ33	Q9CQ33	Leucine-zipper-like transcriptional regulator 1	Lztr1	sp|Q9CQ33|LZTR1_MOUSE Leucine-zipper-like transcriptional regulator 1 OS=Mus musculus GN=Lztr1 PE=2 SV=2	2	2.9	0	56080	54329	55041	32958	51029	22818	64175	43802	45986	50045	52227	25432	48748	40575	53346	58191
P03903	P03903	NADH-ubiquinone oxidoreductase chain 4L	Mtnd4l	sp|P03903|NU4LM_MOUSE NADH-ubiquinone oxidoreductase chain 4L OS=Mus musculus GN=Mtnd4l PE=3 SV=2	1	18.4	0	57563	53674	58349	32157	38654	47182	46938	42642	41775	32852	42990	47901	59762	40485	50776	46845
Q9Z0R4	Q9Z0R4	Intersectin-1	Itsn1	sp|Q9Z0R4|ITSN1_MOUSE Intersectin-1 OS=Mus musculus GN=Itsn1 PE=1 SV=2	2	1.6	0	55848	42640	62549	21724	39549	42633	71966	61372	52819	40976	22089	26945	48256	42848	75677	71389
Q5M956	Q5M956	BTB/POZ domain-containing protein KCTD1	Kctd1	sp|Q5M956|KCTD1_MOUSE BTB/POZ domain-containing protein KCTD1 OS=Mus musculus GN=Kctd1 PE=2 SV=1	2	14.4	0	42568	42048	57111	38840	45868	43378	44741	46884	35211	43646	47407	46026	46439	49602	49808	55787
Q69ZT1	Q69ZT1	Fanconi-associated nuclease 1	Fan1	sp|Q69ZT1|FAN1_MOUSE Fanconi-associated nuclease 1 OS=Mus musculus GN=Fan1 PE=2 SV=2	2	2.9	0	58474	47387	66587	23638	41457	28842	48516	46331	49055	46448	36546	36042	66833	51164	56512	53715
Q8BIS8	Q8BIS8	Coiled-coil domain-containing protein 126	Ccdc126	sp|Q8BIS8|CC126_MOUSE Coiled-coil domain-containing protein 126 OS=Mus musculus GN=Ccdc126 PE=2 SV=1	1	12.9	0	43404	49279	56385	35084	44049	42662	50631	55368	57387	42175	33913	35725	49656	32236	63743	56874
Q9D8U3	Q9D8U3	Endoplasmic reticulum resident protein 27	Erp27	sp|Q9D8U3|ERP27_MOUSE Endoplasmic reticulum resident protein 27 OS=Mus musculus GN=Erp27 PE=2 SV=1	1	7.7	0	13723	17706	68388	121160	36846	256230	37699	29205	9987.5	12656	37500	163880	35211	194290	46097	74744
Q8K2P6	Q8K2P6	Rieske domain-containing protein	Rfesd	sp|Q8K2P6|RFESD_MOUSE Rieske domain-containing protein OS=Mus musculus GN=Rfesd PE=1 SV=1	3	25.5	0	55955	49438	65865	37065	43808	37680	59989	41774	41732	41125	37166	26017	60877	45812	59459	49909
P33896	P33896	Interferon alpha/beta receptor 1	Ifnar1	sp|P33896|INAR1_MOUSE Interferon alpha/beta receptor 1 OS=Mus musculus GN=Ifnar1 PE=1 SV=2	2	4.6	0	50993	43641	52908	35201	41560	46639	59837	36542	49141	44711	34931	40010	49159	45871	65906	49793
Q9JK83	Q9JK83	Partitioning defective 6 homolog beta	Pard6b	sp|Q9JK83|PAR6B_MOUSE Partitioning defective 6 homolog beta OS=Mus musculus GN=Pard6b PE=1 SV=2	2	6.7	0	31658	42293	60095	37921	52103	55105	51406	37070	42662	41205	51418	50155	47588	41294	57028	48080
Q0VEJ0	Q0VEJ0	Centrosomal protein of 76 kDa	Cep76	sp|Q0VEJ0|CEP76_MOUSE Centrosomal protein of 76 kDa OS=Mus musculus GN=Cep76 PE=2 SV=1	3	10.3	0	52085	45559	62816	34728	38104	49904	55709	42469	47588	46862	40185	33108	47128	44077	64624	45692
P30285	P30285	Cyclin-dependent kinase 4	Cdk4	sp|P30285|CDK4_MOUSE Cyclin-dependent kinase 4 OS=Mus musculus GN=Cdk4 PE=1 SV=1	4	20.8	0	61783	44918	51220	38893	41148	51381	56089	46281	37959	35083	41795	38848	46567	51008	57266	47630
Q8BVP5	Q8BVP5	Casein kinase I isoform gamma-2	Csnk1g2	sp|Q8BVP5|KC1G2_MOUSE Casein kinase I isoform gamma-2 OS=Mus musculus GN=Csnk1g2 PE=1 SV=1	6	14.7	0	63053	47297	54489	25612	41962	35763	61320	40383	55883	43349	44899	37451	49153	39616	61488	57354
O35387	O35387	HCLS1-associated protein X-1	Hax1	sp|O35387|HAX1_MOUSE HCLS1-associated protein X-1 OS=Mus musculus GN=Hax1 PE=1 SV=1	3	26.1	0	49526	41914	59501	31359	50827	48908	53953	41634	45657	48364	35340	31630	56784	40180	62413	57315
Q99JZ0	Q99JZ0	Syntenin-2	Sdcbp2	sp|Q99JZ0|SDCB2_MOUSE Syntenin-2 OS=Mus musculus GN=Sdcbp2 PE=2 SV=1	2	7.2	0	58488	51544	71702	26605	52678	24121	72672	49724	37822	45203	45104	21658	59672	35964	75448	61525
Q9QUN7	Q9QUN7	Toll-like receptor 2	Tlr2	sp|Q9QUN7|TLR2_MOUSE Toll-like receptor 2 OS=Mus musculus GN=Tlr2 PE=1 SV=1	2	3.7	0	36773	39324	67175	51463	41951	62427	52278	41484	42036	28148	39528	51491	50490	49939	53579	49710
Q9D1G2	Q9D1G2	Phosphomevalonate kinase	Pmvk	sp|Q9D1G2|PMVK_MOUSE Phosphomevalonate kinase OS=Mus musculus GN=Pmvk PE=2 SV=3	2	8.9	0	49028	52851	53791	27337	45565	50099	51555	52172	39301	35892	36706	42644	51994	47683	59347	61008
P32883	P32883	GTPase KRas;GTPase KRas, N-terminally processed	Kras	sp|P32883|RASK_MOUSE GTPase KRas OS=Mus musculus GN=Kras PE=1 SV=1	5	39.7	0	64812	63491	60117	23806	48699	32526	74851	48317	56646	47897	37645	23184	55899	35659	61183	48408
P41234	P41234	ATP-binding cassette sub-family A member 2	Abca2	sp|P41234|ABCA2_MOUSE ATP-binding cassette sub-family A member 2 OS=Mus musculus GN=Abca2 PE=1 SV=4	3	1.8	0	47129	59780	61160	48422	43464	33931	66419	50043	53792	56152	23274	35068	52465	30072	59534	52836
Q9D708	Q9D708		S100a16	tr|Q9D708|Q9D708_MOUSE Protein S100a16 OS=Mus musculus GN=S100a16 PE=2 SV=1	1	9.7	0	47070	62976	50366	29582	46931	51074	57161	40501	59117	46047	38838	35557	46712	46176	57843	43949
J3QP80;Q9CQL7	J3QP80;Q9CQL7	MORF4 family-associated protein 1	Gm5814;Mrfap1	tr|J3QP80|J3QP80_MOUSE MCG15559 OS=Mus musculus GN=Gm5814 PE=4 SV=1;sp|Q9CQL7|MOFA1_MOUSE MORF4 family-associated protein 1 OS=Mus musculus GN=Mrfap1 PE=1 SV=1	1	18.4	0	56420	54673	53829	27864	38722	47478	63786	52592	44632	47548	45413	33777	57237	40924	62157	40422
P54869	P54869	Hydroxymethylglutaryl-CoA synthase, mitochondrial	Hmgcs2	sp|P54869|HMCS2_MOUSE Hydroxymethylglutaryl-CoA synthase, mitochondrial OS=Mus musculus GN=Hmgcs2 PE=1 SV=2	2	4.1	0	35945	47768	41335	44865	33226	88843	49389	51292	38557	26466	36121	46396	37334	96824	74360	50488
Q9CQ82	Q9CQ82	Centromere protein R	Itgb3bp	sp|Q9CQ82|CENPR_MOUSE Centromere protein R OS=Mus musculus GN=Itgb3bp PE=2 SV=1	1	9.1	0	42619	50298	66541	33266	41443	41533	55858	42192	50153	37219	43710	53261	61231	46729	49061	49271
Q9CZJ6	Q9CZJ6	Protein Mis18-alpha	Mis18a	sp|Q9CZJ6|MS18A_MOUSE Protein Mis18-alpha OS=Mus musculus GN=Mis18a PE=2 SV=1	1	5.4	0	59105	48742	57971	41715	50728	48274	50141	40897	32962	39280	50066	40851	47097	45677	56550	52175
Q9D8T4	Q9D8T4	Golgi apparatus membrane protein TVP23 homolog B	Tvp23b	sp|Q9D8T4|TV23B_MOUSE Golgi apparatus membrane protein TVP23 homolog B OS=Mus musculus GN=Tvp23b PE=1 SV=1	1	13.2	0	61000	58018	65121	36052	51827	38190	50074	48790	39389	47633	35426	29083	64270	39307	62430	50970
Q9JJI6	Q9JJI6	GPI ethanolamine phosphate transferase 3	Pigo	sp|Q9JJI6|PIGO_MOUSE GPI ethanolamine phosphate transferase 3 OS=Mus musculus GN=Pigo PE=1 SV=2	1	2.3	0	47758	56772	69008	32696	40949	31777	53296	42342	55481	40820	32766	40043	69706	42205	64970	62204
Q7TPM1	Q7TPM1	Protein PRRC2B	Prrc2b	sp|Q7TPM1|PRC2B_MOUSE Protein PRRC2B OS=Mus musculus GN=Prrc2b PE=1 SV=1	6	7.1	0	57202	68490	77839	25474	49951	29088	47842	55482	65814	37874	36812	27371	48717	45263	66333	57963
Q9CQW7	Q9CQW7	Apoptogenic protein 1, mitochondrial	Apopt1	sp|Q9CQW7|APOP1_MOUSE Apoptogenic protein 1, mitochondrial OS=Mus musculus GN=Apopt1 PE=1 SV=1	1	6.8	0	44150	44227	61711	43579	45288	41249	51574	41354	52076	35972	49124	48239	55188	48515	51167	51376
P59266	P59266	Fat storage-inducing transmembrane protein 2	Fitm2	sp|P59266|FITM2_MOUSE Fat storage-inducing transmembrane protein 2 OS=Mus musculus GN=Fitm2 PE=1 SV=1	1	5	0	44350	49422	57410	40754	46144	55112	70106	40876	48589	37489	46622	39805	48432	44262	49789	49331
Q9WVF8	Q9WVF8	Tumor suppressor candidate 2	Tusc2	sp|Q9WVF8|TUSC2_MOUSE Tumor suppressor candidate 2 OS=Mus musculus GN=Tusc2 PE=1 SV=3	1	22.7	0	56081	53256	71189	39864	55925	25596	60749	46022	43755	56918	30108	39439	63020	34279	54050	57231
Q9CWG9	Q9CWG9	Biogenesis of lysosome-related organelles complex 1 subunit 2	Bloc1s2	sp|Q9CWG9|BL1S2_MOUSE Biogenesis of lysosome-related organelles complex 1 subunit 2 OS=Mus musculus GN=Bloc1s2 PE=1 SV=1	1	11.9	0	63630	43359	77457	35922	46270	32578	63216	33360	52155	54486	38803	29739	57806	40451	72016	50556
Q75N73	Q75N73	Zinc transporter ZIP14	Slc39a14	sp|Q75N73|S39AE_MOUSE Zinc transporter ZIP14 OS=Mus musculus GN=Slc39a14 PE=1 SV=1	2	7.6	0	64054	52760	62110	19224	36443	35358	67014	51909	47847	50486	43705	36866	55429	37746	60758	77682
Q711T7	Q711T7	Glutamine-dependent NAD(+) synthetase	Nadsyn1	sp|Q711T7|NADE_MOUSE Glutamine-dependent NAD(+) synthetase OS=Mus musculus GN=Nadsyn1 PE=2 SV=1	2	4.8	0	58471	57598	54498	30664	46123	47145	58434	52111	39513	36713	51814	36510	59556	47352	52747	45724
O70479	O70479	BTB/POZ domain-containing adapter for CUL3-mediated RhoA degradation protein 2	Tnfaip1	sp|O70479|BACD2_MOUSE BTB/POZ domain-containing adapter for CUL3-mediated RhoA degradation protein 2 OS=Mus musculus GN=Tnfaip1 PE=2 SV=1	1	4.7	0	62092	53292	64600	35885	43035	38865	59823	42085	66364	44022	42485	37629	39344	48160	56469	43977
Q9DBZ1	Q9DBZ1	Inhibitor of nuclear factor kappa-B kinase-interacting protein	Ikbip	sp|Q9DBZ1|IKIP_MOUSE Inhibitor of nuclear factor kappa-B kinase-interacting protein OS=Mus musculus GN=Ikbip PE=2 SV=2	1	3.5	0	43180	41108	60987	44912	46320	62172	63488	45895	36894	36911	30431	46983	46598	59814	60002	56034
Q05AH6	Q05AH6	Uncharacterized protein C11orf84 homolog		sp|Q05AH6|CK084_MOUSE Uncharacterized protein C11orf84 homolog OS=Mus musculus PE=2 SV=1	2	7.3	0	55420	67595	57174	27246	56743	23118	73175	47063	55883	45079	39747	32915	63829	42274	61693	51527
Q99K41	Q99K41	EMILIN-1	Emilin1	sp|Q99K41|EMIL1_MOUSE EMILIN-1 OS=Mus musculus GN=Emilin1 PE=1 SV=1	2	3.9	0	58183	52000	56765	32825	54118	40527	66153	44880	50027	50840	34785	22981	56195	43902	61240	67038
Q762D5	Q762D5	UDP-N-acetylglucosamine/UDP-glucose/GDP-mannose transporter	Slc35d2	sp|Q762D5|S35D2_MOUSE UDP-N-acetylglucosamine/UDP-glucose/GDP-mannose transporter OS=Mus musculus GN=Slc35d2 PE=2 SV=1	1	4.3	0	38700	53989	56951	44731	49659	40894	53286	47862	49697	35219	55351	42904	47568	45304	55722	56116
Q80YS6	Q80YS6	Actin filament-associated protein 1	Afap1	sp|Q80YS6|AFAP1_MOUSE Actin filament-associated protein 1 OS=Mus musculus GN=Afap1 PE=1 SV=1	3	7.8	0	52974	52702	61230	29827	57401	44447	59316	42177	45668	44062	45753	36058	53539	45753	48141	61341
O70157	O70157	DNA topoisomerase 3-alpha	Top3a	sp|O70157|TOP3A_MOUSE DNA topoisomerase 3-alpha OS=Mus musculus GN=Top3a PE=2 SV=1	2	2	0	56248	49232	63187	37126	58869	39464	60874	39849	39659	59268	40584	35115	47719	45989	58246	52612
Q9DBT3	Q9DBT3	Coiled-coil domain-containing protein 97	Ccdc97	sp|Q9DBT3|CCD97_MOUSE Coiled-coil domain-containing protein 97 OS=Mus musculus GN=Ccdc97 PE=1 SV=1	2	6.5	0	58140	50286	61385	26212	45463	38174	70373	50452	55920	60725	40761	39417	45268	26092	78410	56559
P26151	P26151	High affinity immunoglobulin gamma Fc receptor I	Fcgr1	sp|P26151|FCGR1_MOUSE High affinity immunoglobulin gamma Fc receptor I OS=Mus musculus GN=Fcgr1 PE=1 SV=1	1	3.5	0	42500	34961	51579	44376	42423	56880	70761	50744	39232	27182	43666	45784	52416	66146	62709	61402
Q9QZ49	Q9QZ49	UBX domain-containing protein 8	Ubxn8	sp|Q9QZ49|UBXN8_MOUSE UBX domain-containing protein 8 OS=Mus musculus GN=Ubxn8 PE=1 SV=1	1	7.9	0	49959	59694	64703	30609	48797	34428	54812	48889	47423	46174	41356	44903	49681	52282	63238	50123
A0A0B4J1P5;P01734	A0A0B4J1P5;P01734	T-cell receptor beta chain V region 3H.25	Trbv26	tr|A0A0B4J1P5|A0A0B4J1P5_MOUSE Protein Trbv26 (Fragment) OS=Mus musculus GN=Trbv26 PE=4 SV=1;sp|P01734|TVB1_MOUSE T-cell receptor beta chain V region 3H.25 OS=Mus musculus PE=4 SV=1	1	16.5	0	52180	45846	68157	39740	48856	37957	41720	48462	34797	54193	48765	41729	64770	47080	64046	49991
Q8R5M8	Q8R5M8	Cell adhesion molecule 1	Cadm1	sp|Q8R5M8|CADM1_MOUSE Cell adhesion molecule 1 OS=Mus musculus GN=Cadm1 PE=1 SV=2	2	10.7	0	30657	20699	71665	64967	47867	91366	54261	39983	35127	25431	48874	58365	48552	70312	68144	57696
Q9D6H2	Q9D6H2	Intraflagellar transport protein 25 homolog	Hspb11	sp|Q9D6H2|IFT25_MOUSE Intraflagellar transport protein 25 homolog OS=Mus musculus GN=Hspb11 PE=1 SV=2	2	26.6	0	72567	68445	72840	35598	47452	31522	64083	47341	56200	68263	27345	19855	62325	24768	69785	73302
Q9CZX7	Q9CZX7	Type 2 phosphatidylinositol 4,5-bisphosphate 4-phosphatase	Tmem55a	sp|Q9CZX7|TM55A_MOUSE Type 2 phosphatidylinositol 4,5-bisphosphate 4-phosphatase OS=Mus musculus GN=Tmem55a PE=1 SV=1	3	17.5	0	51055	52886	59872	36057	43473	48103	63770	53565	43280	34517	48775	40365	52229	49659	58981	56774
Q9EPL4	Q9EPL4	Methyltransferase-like protein 9	Mettl9	sp|Q9EPL4|METL9_MOUSE Methyltransferase-like protein 9 OS=Mus musculus GN=Mettl9 PE=2 SV=1	2	6.6	0	50696	51481	63950	30889	42427	45563	57741	49948	45778	45435	48254	43730	67961	41705	63567	46873
Q8BGS3	Q8BGS3	Zinc finger protein with KRAB and SCAN domains 1	Zkscan1	sp|Q8BGS3|ZKSC1_MOUSE Zinc finger protein with KRAB and SCAN domains 1 OS=Mus musculus GN=Zkscan1 PE=2 SV=1	3	8	0	48020	58320	62854	44658	47290	48419	50037	44756	44115	51513	36188	39708	61491	38211	59726	59410
P27784	P27784	C-C motif chemokine 6;CCL6(22-95);CCL6(23-95)	Ccl6	sp|P27784|CCL6_MOUSE C-C motif chemokine 6 OS=Mus musculus GN=Ccl6 PE=1 SV=1	2	35.3	0	33584	38812	50317	40856	40038	93448	70079	48417	37664	33676	27869	40117	43450	109260	85462	56609
A0A075B5Q5	A0A075B5Q5		Ighv2-9	tr|A0A075B5Q5|A0A075B5Q5_MOUSE Protein Ighv2-9 (Fragment) OS=Mus musculus GN=Ighv2-9 PE=4 SV=1	1	13.8	0	35848	37828	84087	58061	49335	63272	62986	45663	38528	28060	38243	45553	47436	71310	61508	50705
Q91XL2	Q91XL2	Ligand of Numb protein X 2	Lnx2	sp|Q91XL2|LNX2_MOUSE Ligand of Numb protein X 2 OS=Mus musculus GN=Lnx2 PE=1 SV=2	1	2.5	0	47922	41868	54371	30201	57963	24835	80699	78547	43882	41086	32707	36522	73147	47139	65316	82326
Q6NZK8	Q6NZK8	Protein tyrosine phosphatase domain-containing protein 1	Ptpdc1	sp|Q6NZK8|PTPC1_MOUSE Protein tyrosine phosphatase domain-containing protein 1 OS=Mus musculus GN=Ptpdc1 PE=2 SV=1	3	5.5	0	46186	48260	76970	33696	48886	33358	51313	52355	51529	42429	47240	46152	61207	43111	75682	51481
E9PUS2	E9PUS2		Btbd2	tr|E9PUS2|E9PUS2_MOUSE Protein Btbd2 OS=Mus musculus GN=Btbd2 PE=4 SV=1	2	6.7	0	57524	53235	58048	39537	52722	36666	64020	48036	52206	49628	49688	30982	47108	42960	56205	65572
P56392	P56392	Cytochrome c oxidase subunit 7A1, mitochondrial	Cox7a1	sp|P56392|CX7A1_MOUSE Cytochrome c oxidase subunit 7A1, mitochondrial OS=Mus musculus GN=Cox7a1 PE=2 SV=1	1	16.2	0	45148	31749	108940	66051	42753	79452	47701	38342	35411	34435	80043	48512	47122	53169	48609	35645
Q8BGR5	Q8BGR5	Protein FAM53B	Fam53b	sp|Q8BGR5|FA53B_MOUSE Protein FAM53B OS=Mus musculus GN=Fam53b PE=2 SV=1	1	4.5	0	59932	59510	67130	27469	41373	45493	53141	40002	62887	59848	43734	39296	53170	39293	73298	56762
Q60714	Q60714	Long-chain fatty acid transport protein 1	Slc27a1	sp|Q60714|S27A1_MOUSE Long-chain fatty acid transport protein 1 OS=Mus musculus GN=Slc27a1 PE=1 SV=1	3	8	0	45402	50411	67275	39546	42286	47413	72914	32982	50668	44397	43799	44592	53249	54904	68975	56895
Q04690	Q04690	Neurofibromin	Nf1	sp|Q04690|NF1_MOUSE Neurofibromin OS=Mus musculus GN=Nf1 PE=1 SV=1	6	2.9	0	63615	66427	55632	31726	57497	42668	59880	52429	48918	46987	34811	35358	56208	48169	65567	52852
Q504M2	Q504M2		Pdp2	tr|Q504M2|Q504M2_MOUSE MCG53395 OS=Mus musculus GN=Pdp2 PE=2 SV=1	3	8.3	0	56076	50890	55142	44299	52355	47728	41857	52794	56699	34577	50548	45205	47309	49207	61611	62851
Q9D809	Q9D809		2200002D01Rik	tr|Q9D809|Q9D809_MOUSE MCG22941 OS=Mus musculus GN=2200002D01Rik PE=1 SV=1	2	12.3	0	31318	44713	46703	55219	52624	60642	60145	43291	46403	40392	39431	49319	62343	70816	56670	61908
O88425	O88425	Nucleoside diphosphate kinase 6	Nme6	sp|O88425|NDK6_MOUSE Nucleoside diphosphate kinase 6 OS=Mus musculus GN=Nme6 PE=2 SV=1	2	11.6	0	45865	52296	58249	38917	47940	55276	60849	44703	49161	32958	48246	50321	56409	49504	68661	60185
Q8BGP5	Q8BGP5	Transmembrane protein 127	Tmem127	sp|Q8BGP5|TM127_MOUSE Transmembrane protein 127 OS=Mus musculus GN=Tmem127 PE=2 SV=1	1	7.6	0	53097	41404	70980	43050	44669	60935	49738	31675	53682	52918	48290	48849	67448	48764	66643	44729
Q9JJC6	Q9JJC6	RILP-like protein 1	Rilpl1	sp|Q9JJC6|RIPL1_MOUSE RILP-like protein 1 OS=Mus musculus GN=Rilpl1 PE=2 SV=1	1	2.7	0	67648	54051	66431	32647	60618	37815	67112	61171	46553	42431	33855	34743	57647	40620	72289	66880
Q61147	Q61147	Ceruloplasmin	Cp	sp|Q61147|CERU_MOUSE Ceruloplasmin OS=Mus musculus GN=Cp PE=1 SV=2	6	7.2	0	45803	48071	67642	34391	43492	48979	71485	47498	52383	66082	42113	35350	61370	43333	73398	53516
B9EKK6	B9EKK6		Nxpe3	tr|B9EKK6|B9EKK6_MOUSE Family with sequence similarity 55, member C OS=Mus musculus GN=Nxpe3 PE=2 SV=1	1	1.6	0	49897	61959	63500	42378	55300	35048	61431	57554	51504	46189	43438	41841	47662	49568	69210	50794
Q9DB76	Q9DB76	ER membrane protein complex subunit 9	Emc9	sp|Q9DB76|EMC9_MOUSE ER membrane protein complex subunit 9 OS=Mus musculus GN=Emc9 PE=2 SV=1	1	7.8	0	74074	55174	64036	39484	51188	38776	64107	44969	55658	45506	42785	38400	43782	45111	66924	66457
A0A075B5Y3;A0A0B4J1M0;A0A075B5W5	A0A075B5Y3;A0A0B4J1M0;A0A075B5W5		Ighv1-80;Ighv1-77;Ighv1-54	tr|A0A075B5Y3|A0A075B5Y3_MOUSE Protein Ighv1-80 OS=Mus musculus GN=Ighv1-80 PE=4 SV=1;tr|A0A0B4J1M0|A0A0B4J1M0_MOUSE Protein Ighv1-77 OS=Mus musculus GN=Ighv1-77 PE=4 SV=1;tr|A0A075B5W5|A0A075B5W5_MOUSE Protein Ighv1-54 (Fragment) OS=Mus musculus GN=Ighv1-	3	43.6	0	22973	36714	57985	39713	46982	96462	83547	71270	32207	27647	36150	38174	68057	126990	80367	58069
Q8C726	Q8C726	BTB/POZ domain-containing protein 9	Btbd9	sp|Q8C726|BTBD9_MOUSE BTB/POZ domain-containing protein 9 OS=Mus musculus GN=Btbd9 PE=2 SV=1	1	2.6	0	61791	67104	76140	44327	36771	38401	66598	58401	44167	51572	43289	39594	52513	38628	67219	64109
Q9CPX9	Q9CPX9	Anaphase-promoting complex subunit 11	Anapc11	sp|Q9CPX9|APC11_MOUSE Anaphase-promoting complex subunit 11 OS=Mus musculus GN=Anapc11 PE=3 SV=1	1	17.9	0	73614	67215	81489	21219	53759	29539	86701	58026	68560	43594	38851	26397	66996	36679	79334	64837
E9Q8T2	E9Q8T2		Prdm15	tr|E9Q8T2|E9Q8T2_MOUSE Protein Prdm15 OS=Mus musculus GN=Prdm15 PE=4 SV=1	4	3.9	0	51005	61199	73522	42590	48059	37974	59745	58171	39466	42477	44938	40468	66379	53610	70326	59993
Q8R2V3	Q8R2V3	Zinc finger protein 445	Znf445	sp|Q8R2V3|ZN445_MOUSE Zinc finger protein 445 OS=Mus musculus GN=Znf445 PE=2 SV=2	1	1.6	0	48943	53705	63821	39345	53188	74372	59761	88201	56210	32817	41660	44316	56106	50580	61435	36737
Q6A078	Q6A078	Centrosomal protein of 290 kDa	Cep290	sp|Q6A078|CE290_MOUSE Centrosomal protein of 290 kDa OS=Mus musculus GN=Cep290 PE=1 SV=2	3	1.6	0	53533	46762	70217	49469	47774	54236	73074	48947	49001	42247	47454	34861	51551	43656	75181	64427
Q61010	Q61010	E3 ubiquitin-protein ligase DTX1	Dtx1	sp|Q61010|DTX1_MOUSE E3 ubiquitin-protein ligase DTX1 OS=Mus musculus GN=Dtx1 PE=1 SV=2	1	3	0	48399	48882	64438	49047	45600	57441	49272	46812	46271	42959	55048	61641	53676	53739	64901	54169
Q80YR6	Q80YR6	DNA endonuclease RBBP8	Rbbp8	sp|Q80YR6|COM1_MOUSE DNA endonuclease RBBP8 OS=Mus musculus GN=Rbbp8 PE=1 SV=1	2	5.2	0	50159	49455	67249	41986	54823	42854	59911	50741	46300	64598	47165	36153	56078	54629	67149	59324
A0A0B4J1K5	A0A0B4J1K5		Iglv3	tr|A0A0B4J1K5|A0A0B4J1K5_MOUSE Protein Iglv3 OS=Mus musculus GN=Iglv3 PE=4 SV=1	1	19.7	0	9572.4	83629	82081	47296	48534	75765	110290	71157	22237	36145	45506	41871	47147	58117	104660	80858
Q3UUG6	Q3UUG6	TBC1 domain family member 24	Tbc1d24	sp|Q3UUG6|TBC24_MOUSE TBC1 domain family member 24 OS=Mus musculus GN=Tbc1d24 PE=2 SV=2	1	2.7	0	58800	51013	69309	41866	39300	32796	80740	59483	47236	48403	41248	35016	63194	53503	77175	69422
Q80V31	Q80V31	Centrosomal protein of 104 kDa	Cep104	sp|Q80V31|CE104_MOUSE Centrosomal protein of 104 kDa OS=Mus musculus GN=Cep104 PE=2 SV=1	1	1.6	0	66066	65248	64488	38828	50765	37660	58942	63738	51675	43053	41826	27471	68113	52392	73118	63429
Q3UU67	Q3UU67	T-cell receptor-associated transmembrane adapter 1	Trat1	sp|Q3UU67|TRAT1_MOUSE T-cell receptor-associated transmembrane adapter 1 OS=Mus musculus GN=Trat1 PE=1 SV=2	1	16	0	83709	54432	73021	44560	56610	27267	63503	48948	66524	60562	40305	37457	48638	41785	54545	68444
A2AGX3	A2AGX3	PR domain-containing protein 11	Prdm11	sp|A2AGX3|PRD11_MOUSE PR domain-containing protein 11 OS=Mus musculus GN=Prdm11 PE=3 SV=1	1	2.8	0	64086	51119	72408	41964	43419	38030	70757	60835	47972	53653	52289	33370	56860	48101	64531	58913
Q8C9A2	Q8C9A2	Endonuclease V	Endov	sp|Q8C9A2|ENDOV_MOUSE Endonuclease V OS=Mus musculus GN=Endov PE=1 SV=2	1	5.9	0	54343	59888	65891	41226	52767	47539	64716	54928	58279	46852	43590	31498	64097	41916	75972	59298
F8VPU2	F8VPU2	FERM, RhoGEF and pleckstrin domain-containing protein 1	Farp1	sp|F8VPU2|FARP1_MOUSE FERM, RhoGEF and pleckstrin domain-containing protein 1 OS=Mus musculus GN=Farp1 PE=1 SV=1	1	1.4	0	57158	53795	66550	41001	49893	64272	67452	46169	53851	39698	49052	38214	58550	51381	53154	68860
Q9DB52	Q9DB52	Protein FAM122A	Fam122a	sp|Q9DB52|F122A_MOUSE Protein FAM122A OS=Mus musculus GN=Fam122a PE=1 SV=1	3	23.6	0	72333	52420	64200	48333	50304	34912	79782	51674	67338	59637	31420	27729	74680	45245	60810	61599
Q8VIJ8	Q8VIJ8	Nitrogen permease regulator 3-like protein	Nprl3	sp|Q8VIJ8|NPRL3_MOUSE Nitrogen permease regulator 3-like protein OS=Mus musculus GN=Nprl3 PE=2 SV=1	2	5.6	0	61372	57123	71281	39028	45455	40650	74646	59822	64291	43061	61425	29957	55998	42652	67456	61535
Q8CC35	Q8CC35	Synaptopodin	Synpo	sp|Q8CC35|SYNPO_MOUSE Synaptopodin OS=Mus musculus GN=Synpo PE=1 SV=2	1	1.8	0	64063	64260	68051	28705	56167	49415	84011	52380	60210	43266	31526	33225	60132	47410	77345	70314
Q9D2U5	Q9D2U5	N-alpha-acetyltransferase 38, NatC auxiliary subunit	Naa38	sp|Q9D2U5|LSMD1_MOUSE N-alpha-acetyltransferase 38, NatC auxiliary subunit OS=Mus musculus GN=Naa38 PE=2 SV=1	1	7.2	0	73862	58812	56292	25965	54160	35061	61220	49328	75300	59433	35535	28269	63991	40242	70702	141270
Q9D8C8	Q9D8C8	Protein phosphatase 1 regulatory subunit 35	Ppp1r35	sp|Q9D8C8|PPR35_MOUSE Protein phosphatase 1 regulatory subunit 35 OS=Mus musculus GN=Ppp1r35 PE=2 SV=1	2	12.7	0	68508	61911	84748	36521	51936	38511	70948	49625	62565	55271	47072	36793	50240	40030	62342	61270
P50608	P50608	Fibromodulin	Fmod	sp|P50608|FMOD_MOUSE Fibromodulin OS=Mus musculus GN=Fmod PE=2 SV=1	1	5.6	0	42592	48362	86766	48358	47762	77321	39231	33154	69079	57538	54642	40693	54169	60541	56921	63786
Q3UHF3	Q3UHF3	Mesoderm induction early response protein 3	Mier3	sp|Q3UHF3|MIER3_MOUSE Mesoderm induction early response protein 3 OS=Mus musculus GN=Mier3 PE=1 SV=2	2	5.4	0	66508	72445	77675	42156	45337	38404	59437	46665	51016	42346	42278	50048	56571	50340	68072	66108
Q9WV92	Q9WV92	Band 4.1-like protein 3;Band 4.1-like protein 3, N-terminally processed	Epb41l3	sp|Q9WV92|E41L3_MOUSE Band 4.1-like protein 3 OS=Mus musculus GN=Epb41l3 PE=1 SV=1	6	7	0	32764	41827	62708	38843	41575	74064	84809	63836	33907	36770	42724	45432	59197	87128	86065	75709
Q8R331	Q8R331	Zinc finger HIT domain-containing protein 1	Znhit1	sp|Q8R331|ZNHI1_MOUSE Zinc finger HIT domain-containing protein 1 OS=Mus musculus GN=Znhit1 PE=2 SV=1	1	14.9	0	69377	69598	83912	33771	47553	28014	77921	54803	62100	62606	35673	24721	67534	42378	73843	80981
Q8K1K9	Q8K1K9	Histone H4 transcription factor	Hinfp	sp|Q8K1K9|HINFP_MOUSE Histone H4 transcription factor OS=Mus musculus GN=Hinfp PE=2 SV=3	1	4.4	0	60914	62630	72281	36338	53051	44579	57027	47527	60693	51884	46910	47635	63691	47587	61088	57188
E9Q3H6	E9Q3H6		Coq10a	tr|E9Q3H6|E9Q3H6_MOUSE Protein Coq10a OS=Mus musculus GN=Coq10a PE=4 SV=1	2	8.9	0	45401	61542	76857	52570	58749	62124	48783	46978	55431	45749	33101	59809	62380	48952	58321	56911
P30276	P30276	G2/mitotic-specific cyclin-B2	Ccnb2	sp|P30276|CCNB2_MOUSE G2/mitotic-specific cyclin-B2 OS=Mus musculus GN=Ccnb2 PE=2 SV=2	4	10.6	0	68365	49826	67319	40383	41148	51048	63871	54389	60897	47023	50315	37712	72888	46502	80828	54079
Q99LW6	Q99LW6	YY1-associated factor 2	Yaf2	sp|Q99LW6|YAF2_MOUSE YY1-associated factor 2 OS=Mus musculus GN=Yaf2 PE=1 SV=1	2	12.8	0	61173	50447	69265	42832	66280	40210	73488	47837	68000	46429	35737	34191	60926	48956	83119	69221
Q60866	Q60866	Phosphotriesterase-related protein	Pter	sp|Q60866|PTER_MOUSE Phosphotriesterase-related protein OS=Mus musculus GN=Pter PE=2 SV=1	3	11.7	0	61406	70645	84229	35242	52543	40314	71484	58071	62506	70325	33925	25029	59456	41850	76744	71086
Q8BGT5	Q8BGT5	Alanine aminotransferase 2	Gpt2	sp|Q8BGT5|ALAT2_MOUSE Alanine aminotransferase 2 OS=Mus musculus GN=Gpt2 PE=1 SV=1	1	3.4	0	61514	56272	74688	49720	46474	37639	59672	58822	57817	55057	42807	40176	63137	51001	66040	63493
F6Q785;Q497M6;O55179;Q07440	F6Q785;Q497M6;O55179		Gm29094;Bcl2a1b;Bcl2a1d	tr|F6Q785|F6Q785_MOUSE Protein Gm29094 (Fragment) OS=Mus musculus GN=Gm29094 PE=4 SV=4;tr|Q497M6|Q497M6_MOUSE B-cell leukemia/lymphoma 2 related protein A1b OS=Mus musculus GN=Bcl2a1b PE=2 SV=1;tr|O55179|O55179_MOUSE A1-d protein OS=Mus musculus GN=Bcl2a1d	3	19	0	68010	78235	80114	32455	62159	37683	82752	74510	58251	44091	37107	34746	57237	26206	82100	71792
Q05910	Q05910	Disintegrin and metalloproteinase domain-containing protein 8	Adam8	sp|Q05910|ADAM8_MOUSE Disintegrin and metalloproteinase domain-containing protein 8 OS=Mus musculus GN=Adam8 PE=1 SV=3	1	1.2	0	51971	55671	59679	49000	38703	58998	61379	78877	73281	38839	46961	45292	45916	65924	64884	54247
Q9EPC1	Q9EPC1	Alpha-parvin	Parva	sp|Q9EPC1|PARVA_MOUSE Alpha-parvin OS=Mus musculus GN=Parva PE=1 SV=1	3	11	0	34888	39534	81682	62288	48112	118550	64076	45188	32186	20137	51569	60532	51320	115400	67049	65083
Q9CX60	Q9CX60	Protein LBH	Lbh	sp|Q9CX60|LBH_MOUSE Protein LBH OS=Mus musculus GN=Lbh PE=1 SV=1	1	15.2	0	61309	66199	76387	34766	56513	37804	71299	58010	51965	52937	49289	33687	62449	48673	73963	62173
Q6PD29	Q6PD29	Zinc finger protein 513	Znf513	sp|Q6PD29|ZN513_MOUSE Zinc finger protein 513 OS=Mus musculus GN=Znf513 PE=1 SV=2	1	2.4	0	63055	51238	69248	41153	43366	51855	66766	56873	45203	50048	48886	57774	64626	59421	55269	64449
Q3UJ81	Q3UJ81	Nuclear envelope phosphatase-regulatory subunit 1	Cnep1r1	sp|Q3UJ81|NEPR1_MOUSE Nuclear envelope phosphatase-regulatory subunit 1 OS=Mus musculus GN=Cnep1r1 PE=2 SV=1	1	8.8	0	46855	44509	74597	53448	51126	73407	53821	49032	45105	34140	42290	55577	52608	81451	76451	70479
P53568	P53568	CCAAT/enhancer-binding protein gamma	Cebpg	sp|P53568|CEBPG_MOUSE CCAAT/enhancer-binding protein gamma OS=Mus musculus GN=Cebpg PE=1 SV=1	1	20.7	0	64327	59360	65184	31619	56173	46421	75805	57575	74884	52409	42943	32641	62588	42866	76025	70931
P52019	P52019	Squalene monooxygenase	Sqle	sp|P52019|ERG1_MOUSE Squalene monooxygenase OS=Mus musculus GN=Sqle PE=2 SV=1	1	2.8	0	56475	50842	66420	40513	47445	62153	70979	41003	61442	53873	60358	45313	54941	52390	64663	64453
A0A075B5R8;A0A075B5R6	A0A075B5R8;A0A075B5R6		Ighv11-2;Ighv11-1	tr|A0A075B5R8|A0A075B5R8_MOUSE Protein Ighv11-2 (Fragment) OS=Mus musculus GN=Ighv11-2 PE=4 SV=1;tr|A0A075B5R6|A0A075B5R6_MOUSE Protein Ighv11-1 (Fragment) OS=Mus musculus GN=Ighv11-1 PE=4 SV=1	1	18.8	0	52107	38819	55988	48505	52136	87999	82369	66195	36986	39585	40003	33359	68476	69593	77326	74005
A2RSQ0	A2RSQ0	DENN domain-containing protein 5B	Dennd5b	sp|A2RSQ0|DEN5B_MOUSE DENN domain-containing protein 5B OS=Mus musculus GN=Dennd5b PE=1 SV=2	3	3.3	0	61647	58994	73013	27459	50048	64499	65550	59976	60110	43309	57291	25957	67693	70587	72158	63618
Q5U5M8	Q5U5M8	Biogenesis of lysosome-related organelles complex 1 subunit 3	Bloc1s3	sp|Q5U5M8|BL1S3_MOUSE Biogenesis of lysosome-related organelles complex 1 subunit 3 OS=Mus musculus GN=Bloc1s3 PE=1 SV=1	1	8.2	0	70869	65126	63591	39613	65815	37948	70480	61970	55099	55573	43580	41203	74258	42004	68104	63142
Q8BJA3	Q8BJA3	Homeobox-containing protein 1	Hmbox1	sp|Q8BJA3|HMBX1_MOUSE Homeobox-containing protein 1 OS=Mus musculus GN=Hmbox1 PE=2 SV=1	2	7.4	0	71734	51990	73777	47002	55766	47164	71502	42992	55285	51264	54153	47407	60827	40552	75108	66645
Q8K2I3	Q8K2I3	Dimethylaniline monooxygenase [N-oxide-forming] 2	Fmo2	sp|Q8K2I3|FMO2_MOUSE Dimethylaniline monooxygenase [N-oxide-forming] 2 OS=Mus musculus GN=Fmo2 PE=1 SV=3	5	11	0	61234	49280	78321	37100	61353	54977	86036	64241	52627	39979	38442	50549	61892	49797	75246	61801
Q9CR13	Q9CR13	UPF0562 protein C7orf55 homolog		sp|Q9CR13|CG055_MOUSE UPF0562 protein C7orf55 homolog OS=Mus musculus PE=3 SV=1	1	13.3	0	57637	58266	56099	47120	58768	50834	61342	47075	48633	59761	64266	63851	54245	49938	67590	59125
O35625	O35625	Axin-1	Axin1	sp|O35625|AXIN1_MOUSE Axin-1 OS=Mus musculus GN=Axin1 PE=1 SV=3	3	6.5	0	87851	71488	74873	27239	58817	21995	69863	59632	55877	80409	44089	27229	83043	42778	85325	92834
P06804	P06804	Tumor necrosis factor;Tumor necrosis factor, membrane form;Intracellular domain 1;Intracellular domain 2;C-domain 1;C-domain 2;Tumor necrosis factor, soluble form	Tnf	sp|P06804|TNFA_MOUSE Tumor necrosis factor OS=Mus musculus GN=Tnf PE=1 SV=2	3	15.7	0	85476	76842	70226	32209	54445	34471	66302	62046	63135	69489	39154	39968	77213	40846	71736	59755
Q6PG16	Q6PG16	Holliday junction recognition protein	Hjurp	sp|Q6PG16|HJURP_MOUSE Holliday junction recognition protein OS=Mus musculus GN=Hjurp PE=2 SV=1	1	2.4	0	59509	44381	83278	56593	54639	49552	71940	43108	37390	46439	57443	61236	58867	67914	65515	64221
F6XX07;Q61190	F6XX07;Q61190	Interleukin-10 receptor subunit beta	Gm21970;Il10rb	tr|F6XX07|F6XX07_MOUSE Protein Gm21970 (Fragment) OS=Mus musculus GN=Gm21970 PE=4 SV=1;sp|Q61190|I10R2_MOUSE Interleukin-10 receptor subunit beta OS=Mus musculus GN=Il10rb PE=1 SV=1	2	8.5	0	56170	63700	70419	48453	46574	49901	72801	50427	58387	54235	45526	43991	62138	68999	77447	52861
Q9DBY5;F8VQB8	Q9DBY5;F8VQB8	Chromobox protein homolog 6	Cbx6;Npcd	sp|Q9DBY5|CBX6_MOUSE Chromobox protein homolog 6 OS=Mus musculus GN=Cbx6 PE=2 SV=2;tr|F8VQB8|F8VQB8_MOUSE Protein Npcd OS=Mus musculus GN=Npcd PE=4 SV=1	3	8	0	53025	66243	73949	40536	58292	56131	68671	49889	62917	45906	50813	32215	73639	56601	67025	74549
Q6EJB6	Q6EJB6	U3 small nucleolar RNA-associated protein 14 homolog B	Utp14b	sp|Q6EJB6|UT14B_MOUSE U3 small nucleolar RNA-associated protein 14 homolog B OS=Mus musculus GN=Utp14b PE=2 SV=2	4	7.4	0	59516	55899	79109	41058	59138	49553	76080	59042	61191	42417	53197	47418	52503	48006	71829	70799
Q9QWK4	Q9QWK4	CD5 antigen-like	Cd5l	sp|Q9QWK4|CD5L_MOUSE CD5 antigen-like OS=Mus musculus GN=Cd5l PE=1 SV=3	3	9.9	0	53679	37947	71009	57534	45410	68216	78908	53875	45705	40742	48758	49961	72989	85018	67036	57742
Q9D162	Q9D162	Coiled-coil domain-containing protein 167	Ccdc167	sp|Q9D162|CC167_MOUSE Coiled-coil domain-containing protein 167 OS=Mus musculus GN=Ccdc167 PE=2 SV=2	2	26.8	0	43706	49652	87707	61578	49378	74251	57825	33252	43245	38227	68070	66441	62618	76088	74578	54500
Q3UUJ4	Q3UUJ4	STE20-related kinase adapter protein alpha	Strada	sp|Q3UUJ4|STRAA_MOUSE STE20-related kinase adapter protein alpha OS=Mus musculus GN=Strada PE=2 SV=1	3	11.1	0	69901	61930	83738	40092	62430	53015	71487	53493	50630	58088	47868	33390	75265	39344	73386	67068
Q8BHS6	Q8BHS6	Armadillo repeat-containing X-linked protein 3	Armcx3	sp|Q8BHS6|ARMX3_MOUSE Armadillo repeat-containing X-linked protein 3 OS=Mus musculus GN=Armcx3 PE=1 SV=1	2	6.6	0	67157	56540	69256	40119	54976	63476	66695	45886	56077	59562	56978	39895	63730	56127	73190	62655
Q8HWA3	Q8HWA3		Ulbp1	tr|Q8HWA3|Q8HWA3_MOUSE Protein Ulbp1 OS=Mus musculus GN=Ulbp1 PE=2 SV=1	1	4.8	0	52270	42222	85639	44326	48739	51651	43112	40097	59208	51335	52160	42111	256760	54651	57788	75856
P11531	P11531	Dystrophin	Dmd	sp|P11531|DMD_MOUSE Dystrophin OS=Mus musculus GN=Dmd PE=1 SV=3	3	1	0	55618	46897	75523	40760	68290	65599	63388	52370	53025	53854	60234	43376	64478	65153	68979	60596
Q5XJY4	Q5XJY4	Presenilins-associated rhomboid-like protein, mitochondrial;P-beta	Parl	sp|Q5XJY4|PARL_MOUSE Presenilins-associated rhomboid-like protein, mitochondrial OS=Mus musculus GN=Parl PE=1 SV=1	2	7.7	0	61926	53707	77498	51515	50048	54280	75260	62124	64409	46507	50329	51091	55025	55350	64095	62319
Q8BWQ4	Q8BWQ4	Cap-specific mRNA (nucleoside-2-O-)-methyltransferase 2	Cmtr2	sp|Q8BWQ4|CMTR2_MOUSE Cap-specific mRNA (nucleoside-2-O-)-methyltransferase 2 OS=Mus musculus GN=Cmtr2 PE=2 SV=1	3	5.5	0	68129	65805	77502	42109	56610	56697	65959	56938	67942	42100	41000	37657	74134	52421	80726	68068
Q99KR6	Q99KR6	E3 ubiquitin-protein ligase RNF34	Rnf34	sp|Q99KR6|RNF34_MOUSE E3 ubiquitin-protein ligase RNF34 OS=Mus musculus GN=Rnf34 PE=1 SV=1	4	14.9	0	64076	72077	82158	31690	53823	49367	70630	60423	67255	75783	47471	30692	67987	45252	71514	76222
Q3TB82	Q3TB82	Pleckstrin homology domain-containing family F member 1	Plekhf1	sp|Q3TB82|PKHF1_MOUSE Pleckstrin homology domain-containing family F member 1 OS=Mus musculus GN=Plekhf1 PE=2 SV=1	1	5	0	71063	47215	66956	56784	62093	52683	62462	59874	55355	55943	59282	40617	67939	46321	73970	63557
Q9JLC6	Q9JLC6	Thyrotroph embryonic factor	Tef	sp|Q9JLC6|TEF_MOUSE Thyrotroph embryonic factor OS=Mus musculus GN=Tef PE=2 SV=1	1	2.7	0	47582	56098	63559	49298	65870	55325	56014	56108	69709	56738	59175	48279	59261	57964	74896	62482
Q9R182	Q9R182	Angiopoietin-related protein 3	Angptl3	sp|Q9R182|ANGL3_MOUSE Angiopoietin-related protein 3 OS=Mus musculus GN=Angptl3 PE=2 SV=1	2	4.2	0	39620	62065	88734	64970	71416	76649	54163	44193	61538	47474	76211	51029	65450	54669	67746	38225
B2RQC2	B2RQC2	Ubiquitin carboxyl-terminal hydrolase 42	Usp42	sp|B2RQC2|UBP42_MOUSE Ubiquitin carboxyl-terminal hydrolase 42 OS=Mus musculus GN=Usp42 PE=2 SV=1	2	2.3	0	68635	55646	83709	48870	55211	48211	59079	66966	55483	48632	57283	38301	63151	64180	74279	67124
Q60969	Q60969	Serine/threonine/tyrosine-interacting protein	Styx	sp|Q60969|STYX_MOUSE Serine/threonine/tyrosine-interacting protein OS=Mus musculus GN=Styx PE=1 SV=2	2	12.6	0	80707	76627	85759	37864	63652	47761	68321	66918	65055	63482	43498	26205	72792	45479	74518	61436
Q9ER80	Q9ER80	Receptor-transporting protein 4	Rtp4	sp|Q9ER80|RTP4_MOUSE Receptor-transporting protein 4 OS=Mus musculus GN=Rtp4 PE=2 SV=1	1	4	0	63037	55988	66986	55393	58933	49944	66889	61446	54043	56984	47528	45537	51900	58157	80084	78546
P98200	P98200	Phospholipid-transporting ATPase IB	Atp8a2	sp|P98200|AT8A2_MOUSE Phospholipid-transporting ATPase IB OS=Mus musculus GN=Atp8a2 PE=1 SV=1	3	3.7	0	61069	60795	93882	38818	42735	53710	92271	67897	58664	44682	51862	41792	52805	62598	78148	70336
Q925Q3	Q925Q3	Sodium/potassium/calcium exchanger 6, mitochondrial	Slc8b1	sp|Q925Q3|NCKX6_MOUSE Sodium/potassium/calcium exchanger 6, mitochondrial OS=Mus musculus GN=Slc8b1 PE=2 SV=2	1	2.4	0	42232	34360	65235	74787	47479	90230	73149	51817	49918	40170	45830	72505	63875	92647	78275	57395
Q32M08	Q32M08	tRNA-dihydrouridine(20a/20b) synthase [NAD(P)+]-like	Dus4l	sp|Q32M08|DUS4L_MOUSE tRNA-dihydrouridine(20a/20b) synthase [NAD(P)+]-like OS=Mus musculus GN=Dus4l PE=2 SV=1	1	4	0	74698	66474	74020	44149	49480	40950	69680	51407	59582	65819	43005	51284	74244	41571	86503	77859
Q6ZPI3	Q6ZPI3	Ligand-dependent corepressor	Lcor	sp|Q6ZPI3|LCOR_MOUSE Ligand-dependent corepressor OS=Mus musculus GN=Lcor PE=2 SV=2	1	3.9	0	68134	70385	80952	39172	64470	27087	78379	60369	79242	76941	41308	37761	69774	45123	88620	64636
Q8BTW8	Q8BTW8	CDK5 regulatory subunit-associated protein 1	Cdk5rap1	sp|Q8BTW8|CK5P1_MOUSE CDK5 regulatory subunit-associated protein 1 OS=Mus musculus GN=Cdk5rap1 PE=2 SV=2	2	4.8	0	72193	65979	73637	44853	61373	61111	64996	62710	59477	49832	46253	45012	63858	49332	79719	59001
Q8VIG1	Q8VIG1	RE1-silencing transcription factor	Rest	sp|Q8VIG1|REST_MOUSE RE1-silencing transcription factor OS=Mus musculus GN=Rest PE=2 SV=2	3	5.5	0	75482	74009	89707	41237	52577	35948	73640	61276	63616	72578	38730	45093	73745	43433	70170	69263
Q8C5D8	Q8C5D8	E3 SUMO-protein ligase PIAS2	Pias2	sp|Q8C5D8|PIAS2_MOUSE E3 SUMO-protein ligase PIAS2 OS=Mus musculus GN=Pias2 PE=1 SV=2	3	7.2	0	95903	81045	85215	28898	45723	33469	85441	82408	68717	65574	39371	29638	80505	43989	91691	63126
B0V2N1	B0V2N1	Receptor-type tyrosine-protein phosphatase S	Ptprs	sp|B0V2N1|PTPRS_MOUSE Receptor-type tyrosine-protein phosphatase S OS=Mus musculus GN=Ptprs PE=1 SV=1	1	1.1	0	62073	51364	71877	53706	57971	68998	60461	56586	57444	45048	58819	63369	61475	62565	65762	54659
Q921I1	Q921I1	Serotransferrin	Tf	sp|Q921I1|TRFE_MOUSE Serotransferrin OS=Mus musculus GN=Tf PE=1 SV=1	22	39	0	54891	39155	74802	59604	52499	71524	63038	50086	44689	37153	57109	63469	72834	86765	75993	70710
A2AUU0	A2AUU0	Methyltransferase-like protein 8	Mettl8	sp|A2AUU0|METL8_MOUSE Methyltransferase-like protein 8 OS=Mus musculus GN=Mettl8 PE=1 SV=2	1	4.6	0	75757	52904	94309	51695	49359	46715	70820	54700	67846	57078	51664	55064	60436	57810	57335	60307
Q8BFU7	Q8BFU7	Putative P2Y purinoceptor 10	P2ry10	sp|Q8BFU7|P2Y10_MOUSE Putative P2Y purinoceptor 10 OS=Mus musculus GN=P2ry10 PE=2 SV=1	1	3.4	0	75222	71616	67682	40099	51728	38279	86524	56803	59338	60222	48153	39058	62262	50851	99563	77453
Q62234	Q62234	Myomesin-1	Myom1	sp|Q62234|MYOM1_MOUSE Myomesin-1 OS=Mus musculus GN=Myom1 PE=1 SV=2	3	3.2	0	56843	38150	55179	158940	52019	89450	61937	36923	63871	40319	43090	113790	68831	52312	55212	51464
Q8CIW6	Q8CIW6	Solute carrier family 26 member 6	Slc26a6	sp|Q8CIW6|S26A6_MOUSE Solute carrier family 26 member 6 OS=Mus musculus GN=Slc26a6 PE=1 SV=2	1	2.1	0	70525	69535	93883	31248	52441	49016	63672	53910	51613	64144	61748	45330	65439	61919	66811	84403
Q9Z2S7	Q9Z2S7	TSC22 domain family protein 3	Tsc22d3	sp|Q9Z2S7|T22D3_MOUSE TSC22 domain family protein 3 OS=Mus musculus GN=Tsc22d3 PE=1 SV=2	3	23.4	0	72238	59852	79803	39224	57059	45966	72200	57164	75407	67496	41070	35878	101210	46639	72980	72049
Q9D0C1	Q9D0C1	E3 ubiquitin-protein ligase RNF115	Rnf115	sp|Q9D0C1|RN115_MOUSE E3 ubiquitin-protein ligase RNF115 OS=Mus musculus GN=Rnf115 PE=1 SV=1	2	15.1	0	61747	58909	87590	47250	48900	52236	76325	58905	73315	66292	47379	40962	64784	56541	65471	70413
Q9CYP7	Q9CYP7	Sestrin-3	Sesn3	sp|Q9CYP7|SESN3_MOUSE Sestrin-3 OS=Mus musculus GN=Sesn3 PE=2 SV=1	1	2.8	0	66611	68205	65417	42095	51515	80899	67054	52636	71339	39018	54427	56014	64338	63680	65556	66621
P30275	P30275	Creatine kinase U-type, mitochondrial	Ckmt1	sp|P30275|KCRU_MOUSE Creatine kinase U-type, mitochondrial OS=Mus musculus GN=Ckmt1 PE=1 SV=1	1	5.3	0	63730	53729	150520	50031	45092	62714	67032	42243	61488	54126	97504	41910	53294	43060	62650	69541
Q9D938	Q9D938	Transmembrane protein 160	Tmem160	sp|Q9D938|TM160_MOUSE Transmembrane protein 160 OS=Mus musculus GN=Tmem160 PE=2 SV=1	1	10.6	0	57738	55495	75380	58797	44236	59939	51444	61604	64430	51941	68009	58549	62836	73030	63756	60976
Q3UZW7	Q3UZW7	Protein-lysine N-methyltransferase EEF2KMT	Eef2kmt	sp|Q3UZW7|EF2KT_MOUSE Protein-lysine N-methyltransferase EEF2KMT OS=Mus musculus GN=Eef2kmt PE=2 SV=1	2	9.3	0	75909	67464	83578	41081	56088	53188	90938	61628	69360	60079	40496	35952	65415	49052	73589	67568
Q9D6J1	Q9D6J1	Ceramide synthase 4	Cers4	sp|Q9D6J1|CERS4_MOUSE Ceramide synthase 4 OS=Mus musculus GN=Cers4 PE=1 SV=1	1	5.1	0	50109	59598	90686	43730	68417	64294	74504	53879	63892	54740	60602	44777	66590	53355	65945	61440
P04351	P04351	Interleukin-2	Il2	sp|P04351|IL2_MOUSE Interleukin-2 OS=Mus musculus GN=Il2 PE=1 SV=1	2	16.6	0	73969	136910	86133	37779	65643	33048	77531	59994	64844	60163	46925	34174	70632	40756	70849	68841
Q61781	Q61781	Keratin, type I cytoskeletal 14	Krt14	sp|Q61781|K1C14_MOUSE Keratin, type I cytoskeletal 14 OS=Mus musculus GN=Krt14 PE=1 SV=2	20	42.1	0	40806	39432	146870	56069	33072	80185	67352	50924	50195	36745	101540	56641	53482	87005	71171	73032
Q5PRE5	Q5PRE5	Proline and serine-rich protein 1	Proser1	sp|Q5PRE5|PRSR1_MOUSE Proline and serine-rich protein 1 OS=Mus musculus GN=Proser1 PE=1 SV=1	2	2	0	70999	61953	87628	51500	59029	44863	71828	51841	66133	59943	54712	52292	65603	51627	69233	60186
Q80XJ3	Q80XJ3	Tetratricopeptide repeat protein 28	Ttc28	sp|Q80XJ3|TTC28_MOUSE Tetratricopeptide repeat protein 28 OS=Mus musculus GN=Ttc28 PE=2 SV=3	2	1.2	0	73292	69896	80175	31714	44674	51112	75907	69029	69294	55282	46096	41147	74742	63591	90763	65940
Q80Y19	Q80Y19	Rho GTPase-activating protein 11A	Arhgap11a	sp|Q80Y19|RHGBA_MOUSE Rho GTPase-activating protein 11A OS=Mus musculus GN=Arhgap11a PE=2 SV=2	2	3.9	0	65617	47035	78405	58454	49200	68901	64277	65675	49367	42549	59502	66056	66317	72686	64271	63192
Q8BHX3	Q8BHX3	Borealin	Cdca8	sp|Q8BHX3|BOREA_MOUSE Borealin OS=Mus musculus GN=Cdca8 PE=1 SV=2	4	27	0	62346	54008	73149	52975	56626	57360	70686	59599	56625	49101	69249	58846	68313	71548	74064	48765
Q3U507	Q3U507	Probable G-protein coupled receptor 174	Gpr174	sp|Q3U507|GP174_MOUSE Probable G-protein coupled receptor 174 OS=Mus musculus GN=Gpr174 PE=2 SV=1	1	3.6	0	74136	60796	85236	48402	60555	43730	87183	67427	70168	53876	47578	40635	72440	45044	82032	63854
Q5PT53	Q5PT53	Sodium/bile acid cotransporter 7	Slc10a7	sp|Q5PT53|NTCP7_MOUSE Sodium/bile acid cotransporter 7 OS=Mus musculus GN=Slc10a7 PE=2 SV=1	1	2.9	0	66749	61321	76718	56137	57412	55745	65919	56556	64049	58721	63518	54538	59473	50191	76529	61148
Q8BSM7	Q8BSM7	Large neutral amino acids transporter small subunit 3	Slc43a1	sp|Q8BSM7|LAT3_MOUSE Large neutral amino acids transporter small subunit 3 OS=Mus musculus GN=Slc43a1 PE=1 SV=1	1	2	0	55035	46759	67435	70992	47583	69270	73103	65865	58282	43005	57329	44008	66603	62289	118090	66663
Q9DCG2	Q9DCG2	CD302 antigen	Cd302	sp|Q9DCG2|CD302_MOUSE CD302 antigen OS=Mus musculus GN=Cd302 PE=2 SV=2	1	6.1	0	52246	42366	76274	62374	67309	81788	72181	57626	39708	33861	63178	70104	63565	89979	82881	61018
Q9CZI9	Q9CZI9	Apoptosis-enhancing nuclease	Aen	sp|Q9CZI9|AEN_MOUSE Apoptosis-enhancing nuclease OS=Mus musculus GN=Aen PE=2 SV=1	2	6.8	0	74211	60055	83044	45097	56133	51727	68981	63143	55241	61416	52021	42122	79760	61501	74724	75158
A2AIW0	A2AIW0	Serologically defined colon cancer antigen 3 homolog	Sdccag3	sp|A2AIW0|SDCG3_MOUSE Serologically defined colon cancer antigen 3 homolog OS=Mus musculus GN=Sdccag3 PE=2 SV=1	2	9.3	0	95044	129650	68494	30256	81685	46119	68721	51141	57555	53681	80749	34722	60822	42528	106300	54145
Q9WVS7	Q9WVS7	Dual specificity mitogen-activated protein kinase kinase 5	Map2k5	sp|Q9WVS7|MP2K5_MOUSE Dual specificity mitogen-activated protein kinase kinase 5 OS=Mus musculus GN=Map2k5 PE=1 SV=1	1	2.9	0	103530	89569	99159	40338	58651	41262	52299	53625	79664	74768	53111	40524	63425	59854	64102	56870
Q8VEJ1	Q8VEJ1	GPN-loop GTPase 2	Gpn2	sp|Q8VEJ1|GPN2_MOUSE GPN-loop GTPase 2 OS=Mus musculus GN=Gpn2 PE=2 SV=2	1	6.8	0	46035	53398	63260	37508	61301	53917	96098	83056	59380	48322	58089	29915	83294	71614	106090	92259
Q62188	Q62188	Dihydropyrimidinase-related protein 3	Dpysl3	sp|Q62188|DPYL3_MOUSE Dihydropyrimidinase-related protein 3 OS=Mus musculus GN=Dpysl3 PE=1 SV=1	5	12.1	0	61395	41806	81734	46135	45178	83577	99647	51509	51031	49753	55568	47233	60769	69206	112600	78626
Q9JM98	Q9JM98	WD repeat-containing protein WRAP73	Wrap73	sp|Q9JM98|WRP73_MOUSE WD repeat-containing protein WRAP73 OS=Mus musculus GN=Wrap73 PE=2 SV=2	3	6.5	0	84102	83262	82947	34238	60088	42244	76422	55237	59981	65955	57143	45015	74762	45500	79207	87835
Q8K207	Q8K207	Uncharacterized protein C1orf21 homolog		sp|Q8K207|CA021_MOUSE Uncharacterized protein C1orf21 homolog OS=Mus musculus PE=1 SV=1	1	12.4	0	84433	74403	104210	20012	68793	36543	82583	61702	83050	77662	49289	39074	75566	55632	83249	73350
Q9D6Z0	Q9D6Z0	Alpha-ketoglutarate-dependent dioxygenase alkB homolog 7, mitochondrial	Alkbh7	sp|Q9D6Z0|ALKB7_MOUSE Alpha-ketoglutarate-dependent dioxygenase alkB homolog 7, mitochondrial OS=Mus musculus GN=Alkbh7 PE=2 SV=1	1	10	0	53315	80737	104900	71792	57110	77425	62277	59514	65253	51762	60448	53783	50708	55230	57144	58881
Q8BGG6	Q8BGG6	Motile sperm domain-containing protein 3	Mospd3	sp|Q8BGG6|MSPD3_MOUSE Motile sperm domain-containing protein 3 OS=Mus musculus GN=Mospd3 PE=2 SV=1	2	17.4	0	64404	60000	85517	54428	52643	80251	63407	54978	56035	50938	56053	54032	65733	82577	66826	68669
P07214	P07214	SPARC	Sparc	sp|P07214|SPRC_MOUSE SPARC OS=Mus musculus GN=Sparc PE=1 SV=1	2	7	0	51014	46163	77458	88940	62294	101030	55188	40323	56390	63119	71708	49827	72598	65533	59631	70187
Q9D011;J3QQ10	Q9D011;J3QQ10	M-phase-specific PLK1-interacting protein	Mplkip;Gm7102	sp|Q9D011|MPLKI_MOUSE M-phase-specific PLK1-interacting protein OS=Mus musculus GN=Mplkip PE=2 SV=1;tr|J3QQ10|J3QQ10_MOUSE Protein Gm7102 OS=Mus musculus GN=Gm7102 PE=4 SV=1	2	23.6	0	65696	66290	81391	40739	66090	38176	93613	67752	71637	85673	55392	36420	77430	42183	84973	74480
Q9DAP7	Q9DAP7	Histone chaperone ASF1B	Asf1b	sp|Q9DAP7|ASF1B_MOUSE Histone chaperone ASF1B OS=Mus musculus GN=Asf1b PE=1 SV=1	2	11.4	0	74263	45531	82155	47036	61966	64928	77541	59823	58004	49271	61158	47973	75323	79940	70856	68313
Q9CZ92	Q9CZ92	Centromere protein P	Cenpp	sp|Q9CZ92|CENPP_MOUSE Centromere protein P OS=Mus musculus GN=Cenpp PE=2 SV=1	4	15.7	0	62756	52803	89359	72036	53464	63684	59366	57766	55407	55842	66204	60677	79784	66605	58804	66133
Q91W61	Q91W61	F-box/LRR-repeat protein 15	Fbxl15	sp|Q91W61|FXL15_MOUSE F-box/LRR-repeat protein 15 OS=Mus musculus GN=Fbxl15 PE=1 SV=2	3	14.3	0	64965	59162	78145	40633	60447	60176	80748	64771	66792	57577	58782	42653	62954	69039	88054	75155
Q9CWF2	Q9CWF2	Tubulin beta-2B chain	Tubb2b	sp|Q9CWF2|TBB2B_MOUSE Tubulin beta-2B chain OS=Mus musculus GN=Tubb2b PE=1 SV=1	21	59.3	0	101440	84433	73854	26513	64031	41991	91306	69469	69972	81442	50713	25081	81996	50431	105250	71933
Q6TYB5	Q6TYB5	Fasciculation and elongation protein zeta-2	Fez2	sp|Q6TYB5|FEZ2_MOUSE Fasciculation and elongation protein zeta-2 OS=Mus musculus GN=Fez2 PE=2 SV=1	2	8.6	0	71829	75339	74410	47311	57291	58364	91450	73138	50397	62839	50366	52076	74103	57392	68179	64679
Q8BGU5	Q8BGU5	Cyclin-Y	Ccny	sp|Q8BGU5|CCNY_MOUSE Cyclin-Y OS=Mus musculus GN=Ccny PE=1 SV=1	3	14.4	0	82876	69452	79461	32459	63340	56244	83453	65954	77379	67692	54510	33166	84034	55836	80557	66085
Q8R216	Q8R216	NAD-dependent protein deacetylase sirtuin-4	Sirt4	sp|Q8R216|SIR4_MOUSE NAD-dependent protein deacetylase sirtuin-4 OS=Mus musculus GN=Sirt4 PE=1 SV=3	3	18.3	0	62569	63803	87282	60329	58182	81197	67299	44044	58368	49749	54735	58256	72995	68695	83380	63138
Q7TN60	Q7TN60	Transmembrane channel-like protein 6	Tmc6	sp|Q7TN60|TMC6_MOUSE Transmembrane channel-like protein 6 OS=Mus musculus GN=Tmc6 PE=2 SV=2	3	6.3	0	81488	77779	87184	43661	68803	50862	74566	64074	67599	65638	42194	32545	72147	61844	99108	68466
Q8CHH5	Q8CHH5	GLTSCR1-like protein	Gltscr1l	sp|Q8CHH5|GSC1L_MOUSE GLTSCR1-like protein OS=Mus musculus GN=Gltscr1l PE=2 SV=2	1	0.9	0	71420	64774	101160	45941	61452	61095	72679	61999	65936	70080	50614	39148	55640	67393	88377	68741
Q9D4F2	Q9D4F2	Presqualene diphosphate phosphatase	Ppapdc2	sp|Q9D4F2|PPAC2_MOUSE Presqualene diphosphate phosphatase OS=Mus musculus GN=Ppapdc2 PE=1 SV=1	1	7.9	0	54281	60132	80039	51807	53662	62908	70098	70641	64607	51715	58847	55143	75974	68326	75912	80203
Q8CGA3	Q8CGA3	Large neutral amino acids transporter small subunit 4	Slc43a2	sp|Q8CGA3|LAT4_MOUSE Large neutral amino acids transporter small subunit 4 OS=Mus musculus GN=Slc43a2 PE=1 SV=1	1	1.9	0	68356	55554	99132	68236	36963	71346	65827	63869	42975	46473	57426	61184	71396	81902	79664	84864
Q9JJ11	Q9JJ11	Transforming acidic coiled-coil-containing protein 3	Tacc3	sp|Q9JJ11|TACC3_MOUSE Transforming acidic coiled-coil-containing protein 3 OS=Mus musculus GN=Tacc3 PE=1 SV=1	2	4.8	0	78325	78792	78671	38331	62515	49458	78979	63845	82247	60117	46088	36082	80246	52228	108140	84772
Q6NZR2	Q6NZR2	Myb/SANT-like DNA-binding domain-containing protein 2	Msantd2	sp|Q6NZR2|MSD2_MOUSE Myb/SANT-like DNA-binding domain-containing protein 2 OS=Mus musculus GN=Msantd2 PE=1 SV=1	4	12.5	0	67865	67342	90562	45409	68261	45151	86459	68261	61943	60640	40548	40952	83811	62721	99559	85211
Q5EER8	Q5EER8		Kctd14	tr|Q5EER8|Q5EER8_MOUSE Potassium channel tetramerisation domain containing 14 OS=Mus musculus GN=Kctd14 PE=2 SV=1	1	4.7	0	105030	61769	80238	39199	69400	54775	85358	77444	53385	49883	46542	34713	90276	63016	95920	83018
Q149G0	Q149G0	UPF0561 protein C2orf68 homolog		sp|Q149G0|CB068_MOUSE UPF0561 protein C2orf68 homolog OS=Mus musculus PE=2 SV=1	1	8.4	0	91442	74760	92115	43591	64149	46272	94254	66358	74645	76305	47169	48918	65803	38186	79579	76320
Q924M5	Q924M5	Protein boule-like	Boll	sp|Q924M5|BOLL_MOUSE Protein boule-like OS=Mus musculus GN=Boll PE=2 SV=2	1	5.3	0	97935	91604	74579	37670	70069	40007	72976	57013	80855	69072	58575	48932	78255	52191	77777	69797
P34152	P34152	Focal adhesion kinase 1	Ptk2	sp|P34152|FAK1_MOUSE Focal adhesion kinase 1 OS=Mus musculus GN=Ptk2 PE=1 SV=3	4	4.7	0	83189	79297	82711	43414	64430	66529	75087	70177	55133	57930	51655	32440	80533	62346	85054	88387
E9Q7L0	E9Q7L0		Ogdhl	tr|E9Q7L0|E9Q7L0_MOUSE Protein Ogdhl OS=Mus musculus GN=Ogdhl PE=4 SV=1	7	7.8	0	67391	68692	87122	56789	56731	76895	58612	68527	71904	54279	56552	57670	76617	52659	91203	64159
P13595	P13595	Neural cell adhesion molecule 1	Ncam1	sp|P13595|NCAM1_MOUSE Neural cell adhesion molecule 1 OS=Mus musculus GN=Ncam1 PE=1 SV=3	2	2.2	0	60143	59490	96447	58988	73900	95394	49713	52484	79355	73058	64810	48323	65004	61544	69965	63887
Q3UHI4	Q3UHI4	Protein TMED8	Tmed8	sp|Q3UHI4|TMED8_MOUSE Protein TMED8 OS=Mus musculus GN=Tmed8 PE=2 SV=1	2	16.3	0	108200	93122	88299	30134	70804	36293	91232	76414	90468	91692	40928	28347	75368	35535	101400	96996
Q8BN57	Q8BN57	Protein C3orf33 homolog		sp|Q8BN57|CC033_MOUSE Protein C3orf33 homolog OS=Mus musculus PE=2 SV=1	1	3.7	0	73587	64774	90104	54682	57665	46493	84170	60467	63711	62953	63464	46004	84444	67861	92362	62056
Q5U4C1	Q5U4C1	G-protein coupled receptor-associated sorting protein 1	Gprasp1	sp|Q5U4C1|GASP1_MOUSE G-protein coupled receptor-associated sorting protein 1 OS=Mus musculus GN=Gprasp1 PE=1 SV=1	3	4.2	0	71972	65880	98075	46629	68973	58147	77651	62477	56481	69829	52226	42009	79842	67452	80508	80203
Q8C7Q4	Q8C7Q4	RNA-binding protein 4	Rbm4	sp|Q8C7Q4|RBM4_MOUSE RNA-binding protein 4 OS=Mus musculus GN=Rbm4 PE=1 SV=1	13	43.5	0	98632	75088	90107	46739	60792	45304	62287	72714	82463	61567	47834	47619	90536	56755	69136	85296
E9Q3C1	E9Q3C1		C2cd2	tr|E9Q3C1|E9Q3C1_MOUSE Protein C2cd2 OS=Mus musculus GN=C2cd2 PE=1 SV=1	1	3.7	0	58617	273630	78864	36020	85143	46351	79545	73554	58120	43681	49067	60126	57161	52147	77791	75642
Q61337	Q61337	Bcl2-associated agonist of cell death	Bad	sp|Q61337|BAD_MOUSE Bcl2-associated agonist of cell death OS=Mus musculus GN=Bad PE=1 SV=1	1	4.9	0	92344	89906	90733	40747	62619	37646	103350	60718	89835	75190	50625	28664	76928	43960	111350	87903
Q8R104	Q8R104	NAD-dependent protein deacetylase sirtuin-3	Sirt3	sp|Q8R104|SIR3_MOUSE NAD-dependent protein deacetylase sirtuin-3 OS=Mus musculus GN=Sirt3 PE=1 SV=2	1	4.2	0	71720	45899	81735	52114	64454	79243	69550	62629	81970	67006	59316	50591	73780	82292	78049	62793
Q4VGL6;P0C090	Q4VGL6;P0C090	Roquin-1;Roquin-2	Rc3h1;Rc3h2	sp|Q4VGL6|RC3H1_MOUSE Roquin-1 OS=Mus musculus GN=Rc3h1 PE=1 SV=1;sp|P0C090|RC3H2_MOUSE Roquin-2 OS=Mus musculus GN=Rc3h2 PE=1 SV=1	2	3.2	0	70563	66059	88235	50349	62525	51350	90803	73275	65536	73204	62095	40317	76170	61583	88250	77279
Q9JI08	Q9JI08	Bridging integrator 3	Bin3	sp|Q9JI08|BIN3_MOUSE Bridging integrator 3 OS=Mus musculus GN=Bin3 PE=2 SV=1	2	8.3	0	77183	75935	90416	43631	67922	53295	85173	55451	75862	73706	59188	53016	66052	57304	83953	82521
Q8R060	Q8R060	Protein zwilch homolog	Zwilch	sp|Q8R060|ZWILC_MOUSE Protein zwilch homolog OS=Mus musculus GN=Zwilch PE=2 SV=1	2	4.6	0	73131	58615	97839	64116	62224	79666	78915	43760	42517	50163	53801	68580	85585	105770	82293	68164
Q8K4T5	Q8K4T5	Dual specificity protein phosphatase 19	Dusp19	sp|Q8K4T5|DUS19_MOUSE Dual specificity protein phosphatase 19 OS=Mus musculus GN=Dusp19 PE=2 SV=1	1	7.7	0	102070	83559	74795	39143	63299	44785	99960	76981	83574	71383	45729	40027	87969	44857	84546	95471
Q497H0	Q497H0	AN1-type zinc finger protein 3	Zfand3	sp|Q497H0|ZFAN3_MOUSE AN1-type zinc finger protein 3 OS=Mus musculus GN=Zfand3 PE=2 SV=1	1	5.3	0	69955	68741	90282	79840	58173	72396	67190	48008	55823	84758	74745	53612	61137	67978	74039	69089
Q8BTI7	Q8BTI7	Serine/threonine-protein phosphatase 6 regulatory ankyrin repeat subunit C	Ankrd52	sp|Q8BTI7|ANR52_MOUSE Serine/threonine-protein phosphatase 6 regulatory ankyrin repeat subunit C OS=Mus musculus GN=Ankrd52 PE=1 SV=1	2	3.3	0	75192	69260	105510	50657	73083	49924	79517	68071	57031	69682	61284	51880	80422	48252	87075	81186
Q8CG19	Q8CG19	Latent-transforming growth factor beta-binding protein 1	Ltbp1	sp|Q8CG19|LTBP1_MOUSE Latent-transforming growth factor beta-binding protein 1 OS=Mus musculus GN=Ltbp1 PE=2 SV=2	4	3.2	0	76921	61204	78429	60671	57991	211870	57951	55210	76829	57937	57674	62678	66426	55122	55318	68270
Q9R0A5	Q9R0A5	Serine/threonine-protein kinase Nek3	Nek3	sp|Q9R0A5|NEK3_MOUSE Serine/threonine-protein kinase Nek3 OS=Mus musculus GN=Nek3 PE=1 SV=2	1	3.9	0	91552	81949	90059	36074	68764	44769	105310	88340	75877	64161	48167	31784	89115	52357	96685	89058
Q9QWV1	Q9QWV1		H2-Oa	tr|Q9QWV1|Q9QWV1_MOUSE H2-O alpha OS=Mus musculus GN=H2-Oa PE=2 SV=1	1	3.6	0	52426	48773	85947	80399	55714	94832	72480	70001	54776	52074	72087	86778	61854	90917	67329	67315
Q4QQM5	Q4QQM5	Protein FAM73A	Fam73a	sp|Q4QQM5|FA73A_MOUSE Protein FAM73A OS=Mus musculus GN=Fam73a PE=2 SV=1	2	6	0	76918	81615	90270	49279	57477	45006	93977	72509	78830	59985	46535	52817	85703	58381	92419	83043
Q60754	Q60754	Macrophage receptor MARCO	Marco	sp|Q60754|MARCO_MOUSE Macrophage receptor MARCO OS=Mus musculus GN=Marco PE=1 SV=1	1	2.1	0	70597	61826	74966	59941	47360	83486	95018	81982	60530	47261	52733	56177	70783	73104	103940	82786
Q9D5J6	Q9D5J6	Sedoheptulokinase	Shpk	sp|Q9D5J6|SHPK_MOUSE Sedoheptulokinase OS=Mus musculus GN=Shpk PE=1 SV=1	3	11.8	0	78168	80624	91593	39841	81881	48627	75798	76498	74928	71999	63310	42136	75331	53943	102550	75259
A6H6S0	A6H6S0		Herc3	tr|A6H6S0|A6H6S0_MOUSE Hect domain and RLD 3 OS=Mus musculus GN=Herc3 PE=2 SV=1	2	2.9	0	95727	82867	101580	42301	66502	44781	82160	62471	76395	73810	63687	46482	69361	49313	89793	89960
Q9R0M8	Q9R0M8	UDP-galactose translocator	Slc35a2	sp|Q9R0M8|S35A2_MOUSE UDP-galactose translocator OS=Mus musculus GN=Slc35a2 PE=2 SV=1	1	2.8	0	63941	66819	100770	59277	57087	71817	88090	70158	57639	52018	79454	56939	61237	64506	87000	80132
Q3UA16	Q3UA16	Kinetochore protein Spc25	Spc25	sp|Q3UA16|SPC25_MOUSE Kinetochore protein Spc25 OS=Mus musculus GN=Spc25 PE=2 SV=1	1	5.3	0	61785	53467	98097	67398	61234	90347	72742	55374	56671	46755	73848	69475	69141	93132	83096	73119
Q9Z150	Q9Z150		Zbtb12	tr|Q9Z150|Q9Z150_MOUSE Protein Zbtb12 OS=Mus musculus GN=Zbtb12 PE=2 SV=1	1	2.2	0	68946	71995	80405	66659	66517	69289	100050	60391	46767	62598	77089	54102	73643	74235	74816	71065
Q8BH50	Q8BH50	Uncharacterized protein C18orf25 homolog		sp|Q8BH50|CR025_MOUSE Uncharacterized protein C18orf25 homolog OS=Mus musculus PE=2 SV=1	2	10.2	0	88625	110180	83881	33090	82519	33077	112740	90647	99107	55717	48009	26771	93436	44979	124650	95033
Q8K190	Q8K190	SAYSvFN domain-containing protein 1	Saysd1	sp|Q8K190|SMDC1_MOUSE SAYSvFN domain-containing protein 1 OS=Mus musculus GN=Saysd1 PE=2 SV=1	3	41	0	68537	83190	123780	62617	56318	53547	58324	49692	74444	82307	68305	56633	67659	63359	87949	78112
Q08761	Q08761	Vitamin K-dependent protein S	Pros1	sp|Q08761|PROS_MOUSE Vitamin K-dependent protein S OS=Mus musculus GN=Pros1 PE=2 SV=1	4	6.8	0	107430	90260	95549	58798	70971	46745	64566	65826	113810	57841	47023	49133	70936	61603	73284	74059
Q9D7I5	Q9D7I5	Phospholysine phosphohistidine inorganic pyrophosphate phosphatase	Lhpp	sp|Q9D7I5|LHPP_MOUSE Phospholysine phosphohistidine inorganic pyrophosphate phosphatase OS=Mus musculus GN=Lhpp PE=2 SV=1	1	3.3	0	75835	64983	87932	51883	69955	57623	88976	71079	73696	58662	55815	39469	97134	57352	97542	98952
Q99LV7	Q99LV7	Phosphatidylinositol-glycan biosynthesis class X protein	Pigx	sp|Q99LV7|PIGX_MOUSE Phosphatidylinositol-glycan biosynthesis class X protein OS=Mus musculus GN=Pigx PE=2 SV=2	2	11.8	0	77484	70163	86441	49313	81143	64758	80793	67960	89623	67199	50949	51917	71045	58739	87434	75699
Q921N7	Q921N7	Transmembrane protein 70, mitochondrial	Tmem70	sp|Q921N7|TMM70_MOUSE Transmembrane protein 70, mitochondrial OS=Mus musculus GN=Tmem70 PE=2 SV=2	2	9.1	0	70330	79419	80999	55048	67567	49538	87524	75299	87878	57139	55721	52785	88433	69485	87737	68812
Q9QYI5	Q9QYI5	DnaJ homolog subfamily B member 2	Dnajb2	sp|Q9QYI5|DNJB2_MOUSE DnaJ homolog subfamily B member 2 OS=Mus musculus GN=Dnajb2 PE=1 SV=2	2	8.3	0	85447	74294	87742	41984	75354	60016	101010	70427	83457	63383	55771	40591	76877	54546	95866	83251
P35283	P35283	Ras-related protein Rab-12	Rab12	sp|P35283|RAB12_MOUSE Ras-related protein Rab-12 OS=Mus musculus GN=Rab12 PE=1 SV=3	4	15.6	0	64423	56646	88804	68781	44398	89325	75140	60996	62634	46735	65535	73393	70472	97875	97579	79640
O35678	O35678	Monoglyceride lipase	Mgll	sp|O35678|MGLL_MOUSE Monoglyceride lipase OS=Mus musculus GN=Mgll PE=1 SV=1	1	4.6	0	102390	73153	85907	45304	72234	55209	85502	77300	79341	71934	49291	40430	82022	56110	101510	79770
Q80U62	Q80U62	Run domain Beclin-1 interacting and cysteine-rich containing protein	Kiaa0226	sp|Q80U62|RUBIC_MOUSE Run domain Beclin-1 interacting and cysteine-rich containing protein OS=Mus musculus GN=Kiaa0226 PE=1 SV=2	1	2.3	0	66605	60847	92846	38761	67916	83298	87633	65487	62916	58473	55588	53259	81566	102770	94460	80323
Q8BP00	Q8BP00	IQ calmodulin-binding motif-containing protein 1	Iqcb1	sp|Q8BP00|IQCB1_MOUSE IQ calmodulin-binding motif-containing protein 1 OS=Mus musculus GN=Iqcb1 PE=1 SV=2	1	2.3	0	83136	68999	89641	51538	68863	50765	88783	72746	79611	58597	63223	40622	76004	72105	96531	87081
O89001	O89001	Carboxypeptidase D	Cpd	sp|O89001|CBPD_MOUSE Carboxypeptidase D OS=Mus musculus GN=Cpd PE=1 SV=2	1	1.2	0	66227	57364	140460	52052	58210	62291	82168	63343	75504	47595	122610	54079	65166	64822	82547	79828
Q80V24	Q80V24	Transcription cofactor vestigial-like protein 4	Vgll4	sp|Q80V24|VGLL4_MOUSE Transcription cofactor vestigial-like protein 4 OS=Mus musculus GN=Vgll4 PE=1 SV=1	1	7.3	0	96930	81132	88860	40189	57860	65594	101760	76486	69891	77959	66280	48070	83048	55882	74193	73521
Q9WTL8	Q9WTL8	Aryl hydrocarbon receptor nuclear translocator-like protein 1	Arntl	sp|Q9WTL8|BMAL1_MOUSE Aryl hydrocarbon receptor nuclear translocator-like protein 1 OS=Mus musculus GN=Arntl PE=1 SV=2	2	7.3	0	77825	82679	98819	49662	67198	66968	88385	74970	59684	57690	58367	56629	73239	72442	95414	71414
Q8BGK6	Q8BGK6	Y+L amino acid transporter 2	Slc7a6	sp|Q8BGK6|YLAT2_MOUSE Y+L amino acid transporter 2 OS=Mus musculus GN=Slc7a6 PE=1 SV=1	1	3.3	0	91190	64923	106580	53120	71199	45982	79881	84140	78460	65403	67269	32167	82441	61128	96409	97849
D3Z3Y1	D3Z3Y1		Pigg	tr|D3Z3Y1|D3Z3Y1_MOUSE Protein Pigg OS=Mus musculus GN=Pigg PE=4 SV=1	4	5.3	0	59809	75573	108790	51881	54917	69740	79301	52766	59622	63207	65060	69210	73074	82706	96016	97233
P01878	P01878	Ig alpha chain C region		sp|P01878|IGHA_MOUSE Ig alpha chain C region OS=Mus musculus PE=1 SV=1	7	35.8	0	33273	34062	42099	66737	57052	181500	167140	100680	42533	33159	33082	58393	56291	185230	169540	148120
P53798	P53798	Squalene synthase	Fdft1	sp|P53798|FDFT_MOUSE Squalene synthase OS=Mus musculus GN=Fdft1 PE=2 SV=2	2	7.5	0	81286	78414	87200	58548	63961	66799	86965	67978	74434	64624	58968	37204	76482	58597	107950	98536
Q75VT8	Q75VT8	Protein HIDE1	Hide1	sp|Q75VT8|HIDE1_MOUSE Protein HIDE1 OS=Mus musculus GN=Hide1 PE=1 SV=1	1	6.8	0	72433	74850	91474	56844	68352	50086	90556	79809	78632	65819	67401	48632	80015	53468	97762	84246
Q9CZL2	Q9CZL2	Uncharacterized protein C4orf32 homolog		sp|Q9CZL2|CD032_MOUSE Uncharacterized protein C4orf32 homolog OS=Mus musculus PE=2 SV=1	2	43.5	0	63533	52887	106870	68730	63567	102450	77114	50289	56469	68295	84972	80839	84256	70716	69083	62034
O35316	O35316	Sodium- and chloride-dependent taurine transporter	Slc6a6	sp|O35316|SC6A6_MOUSE Sodium- and chloride-dependent taurine transporter OS=Mus musculus GN=Slc6a6 PE=1 SV=2	1	2.7	0	96296	96846	79344	33772	76586	40193	84875	81800	94563	89388	46409	50008	93777	44058	103730	97738
P0C7N9	P0C7N9	Proteasome assembly chaperone 4	Psmg4	sp|P0C7N9|PSMG4_MOUSE Proteasome assembly chaperone 4 OS=Mus musculus GN=Psmg4 PE=1 SV=1	1	20.3	0	97799	85055	107700	38521	70261	57563	99655	69153	86313	72342	40546	43242	97914	64418	94090	73814
Q923K4	Q923K4	tRNA modification GTPase GTPBP3, mitochondrial	Gtpbp3	sp|Q923K4|GTPB3_MOUSE tRNA modification GTPase GTPBP3, mitochondrial OS=Mus musculus GN=Gtpbp3 PE=2 SV=1	4	12.6	0	87224	68092	88924	59976	74465	77445	71536	57895	66817	59446	64299	78076	76416	69771	80106	72412
Q8C3U9	Q8C3U9		Zbtb37	tr|Q8C3U9|Q8C3U9_MOUSE Protein Zbtb37 OS=Mus musculus GN=Zbtb37 PE=2 SV=1	1	2.8	0	78960	82844	96118	50805	80916	53739	74733	63383	77716	64023	59955	64394	87212	59358	94319	76773
Q9Z104	Q9Z104	SWI/SNF-related matrix-associated actin-dependent regulator of chromatin subfamily E member 1-related	Hmg20b	sp|Q9Z104|HM20B_MOUSE SWI/SNF-related matrix-associated actin-dependent regulator of chromatin subfamily E member 1-related OS=Mus musculus GN=Hmg20b PE=1 SV=1	2	7.3	0	83769	71602	83425	58856	75078	61759	98402	86847	72962	62230	53079	43499	83313	63653	88890	85346
O35185;Q99PV5	O35185;Q99PV5	Class E basic helix-loop-helix protein 40;Class E basic helix-loop-helix protein 41	Bhlhe40;Bhlhe41	sp|O35185|BHE40_MOUSE Class E basic helix-loop-helix protein 40 OS=Mus musculus GN=Bhlhe40 PE=1 SV=1;sp|Q99PV5|BHE41_MOUSE Class E basic helix-loop-helix protein 41 OS=Mus musculus GN=Bhlhe41 PE=1 SV=1	2	5.8	0	83358	100280	98552	45064	68401	45575	81617	80742	82347	62092	57338	48828	98195	62334	101200	73803
Q6KAU8	Q6KAU8	Autophagy-related protein 16-2	Atg16l2	sp|Q6KAU8|A16L2_MOUSE Autophagy-related protein 16-2 OS=Mus musculus GN=Atg16l2 PE=2 SV=2	2	5.3	0	113650	80010	90945	41302	69927	53595	92240	78163	78289	78076	58006	52064	90359	42013	91141	89594
Q9QZC7	Q9QZC7	Pleckstrin homology domain-containing family B member 2	Plekhb2	sp|Q9QZC7|PKHB2_MOUSE Pleckstrin homology domain-containing family B member 2 OS=Mus musculus GN=Plekhb2 PE=1 SV=1	1	7.2	0	53086	72128	94229	61572	78114	80508	71681	69012	70634	78876	77636	56978	76830	67776	77141	78252
Q9Z2G0	Q9Z2G0	Protein fem-1 homolog B	Fem1b	sp|Q9Z2G0|FEM1B_MOUSE Protein fem-1 homolog B OS=Mus musculus GN=Fem1b PE=1 SV=1	1	1.4	0	102710	84486	80957	57788	61163	60900	94714	78718	67155	66644	55680	61901	91062	57878	70525	86885
Q4VAA7	Q4VAA7	Sorting nexin-33	Snx33	sp|Q4VAA7|SNX33_MOUSE Sorting nexin-33 OS=Mus musculus GN=Snx33 PE=1 SV=1	3	7.8	0	80194	89291	98625	61101	66156	59475	93368	68239	75263	61454	54278	57448	80130	56341	92548	88761
Q5SXI5	Q5SXI5	Zinc finger protein 496	Znf496	sp|Q5SXI5|ZN496_MOUSE Zinc finger protein 496 OS=Mus musculus GN=Znf496 PE=1 SV=1	3	9.2	0	69621	77243	94661	56766	55982	68270	86107	77420	82339	55729	66227	67469	72338	64761	93542	89228
Q8BG19	Q8BG19	Transmembrane and TPR repeat-containing protein 4	Tmtc4	sp|Q8BG19|TMTC4_MOUSE Transmembrane and TPR repeat-containing protein 4 OS=Mus musculus GN=Tmtc4 PE=2 SV=1	2	4.6	0	77370	69184	89931	64079	56501	59254	83281	73766	77207	64237	72849	60946	84809	56995	93536	96017
O70472	O70472	Transmembrane protein 131	Tmem131	sp|O70472|TM131_MOUSE Transmembrane protein 131 OS=Mus musculus GN=Tmem131 PE=2 SV=2	1	1.1	0	60675	74197	104890	67793	62723	86817	83651	62148	60089	53144	81215	82645	74579	77630	76234	71027
Q9D009	Q9D009	Putative lipoyltransferase 2, mitochondrial	Lipt2	sp|Q9D009|LIPT2_MOUSE Putative lipoyltransferase 2, mitochondrial OS=Mus musculus GN=Lipt2 PE=1 SV=2	1	4.3	0	75347	75725	101580	66942	54549	68855	82297	70354	63816	58018	72312	66810	89968	70759	91018	72842
Q8R1Z9	Q8R1Z9	RING finger protein 121	Rnf121	sp|Q8R1Z9|RN121_MOUSE RING finger protein 121 OS=Mus musculus GN=Rnf121 PE=2 SV=1	3	12.2	0	47626	52475	79723	67897	55386	131800	98286	65257	50615	51502	70337	71460	61079	133310	114550	82968
Q922G0;Q3TZX3	Q922G0;Q3TZX3	Solute carrier family 25 member 36;Solute carrier family 25 member 33	Slc25a36;Slc25a33	sp|Q922G0|S2536_MOUSE Solute carrier family 25 member 36 OS=Mus musculus GN=Slc25a36 PE=2 SV=1;sp|Q3TZX3|S2533_MOUSE Solute carrier family 25 member 33 OS=Mus musculus GN=Slc25a33 PE=2 SV=1	1	4.2	0	47647	51646	111360	89614	53304	97137	74312	73876	51089	53618	100820	89627	83327	90292	67675	76428
O08843	O08843	Leukocyte-specific transcript 1 protein	Lst1	sp|O08843|LST1_MOUSE Leukocyte-specific transcript 1 protein OS=Mus musculus GN=Lst1 PE=1 SV=1	1	12.6	0	45893	53157	104460	83815	66658	122040	83614	65324	40111	37285	81694	90157	77241	96116	102680	84378
Q9QX15;Q9EQR4	Q9QX15;Q9EQR4		Clca3a1;Clca3a2	tr|Q9QX15|Q9QX15_MOUSE Calcium-sensitive chloride conductance protein-1 OS=Mus musculus GN=Clca3a1 PE=2 SV=1;tr|Q9EQR4|Q9EQR4_MOUSE Chloride channel calcium activated 2 OS=Mus musculus GN=Clca3a2 PE=2 SV=1	2	3.7	0	74073	69628	85929	85749	64513	95897	62362	49455	75980	55825	69171	69552	76557	106020	76534	75487
Q8CGE8	Q8CGE8	Interferon-activable protein 205-A	Ifi205a	sp|Q8CGE8|IFI5A_MOUSE Interferon-activable protein 205-A OS=Mus musculus GN=Ifi205a PE=2 SV=1	10	38.9	0	47413	52605	71323	60960	64340	89219	130440	97719	48828	49477	50501	68279	81312	108810	112610	106450
Q9Z1F6	Q9Z1F6	Leukocyte cell-derived chemotaxin 1;Chondrosurfactant protein;Chondromodulin-1	Lect1	sp|Q9Z1F6|LECT1_MOUSE Leukocyte cell-derived chemotaxin 1 OS=Mus musculus GN=Lect1 PE=1 SV=2	1	2.1	0	79167	62720	103110	76737	73028	83288	67880	57381	70082	48576	88891	68954	90408	90291	60367	73710
Q9CR41	Q9CR41	Huntingtin-interacting protein K	Hypk	sp|Q9CR41|HYPK_MOUSE Huntingtin-interacting protein K OS=Mus musculus GN=Hypk PE=2 SV=2	2	24.8	0	123180	89678	87014	37706	74572	42937	103270	90780	81115	79048	43041	42904	107820	48725	108160	98102
Q6P5E8	Q6P5E8	Diacylglycerol kinase theta	Dgkq	sp|Q6P5E8|DGKQ_MOUSE Diacylglycerol kinase theta OS=Mus musculus GN=Dgkq PE=2 SV=1	3	7	0	79581	92013	117210	45421	67953	58848	87940	69159	70104	76633	65045	38882	93927	75033	101260	78481
Q8R5G7	Q8R5G7	Arf-GAP with Rho-GAP domain, ANK repeat and PH domain-containing protein 3	Arap3	sp|Q8R5G7|ARAP3_MOUSE Arf-GAP with Rho-GAP domain, ANK repeat and PH domain-containing protein 3 OS=Mus musculus GN=Arap3 PE=1 SV=3	2	2	0	77254	57519	82568	60725	66948	113300	81982	56401	72241	44531	60021	70785	80770	109320	91276	87668
Q8BUH1	Q8BUH1	Thioredoxin-like protein 4B	Txnl4b	sp|Q8BUH1|TXN4B_MOUSE Thioredoxin-like protein 4B OS=Mus musculus GN=Txnl4b PE=2 SV=2	3	22.1	0	119280	100910	82809	39474	78863	46228	104320	74800	76439	86364	63460	40020	97690	43702	100930	94068
A0A075B5X7	A0A075B5X7		Ighv1-69	tr|A0A075B5X7|A0A075B5X7_MOUSE Protein Ighv1-69 OS=Mus musculus GN=Ighv1-69 PE=4 SV=1	2	42.2	0	34504	46721	174970	49567	35534	96957	162180	105620	40961	39611	136850	69485	48009	89705	128480	116050
O88310	O88310	Intelectin-1a	Itln1	sp|O88310|ITL1A_MOUSE Intelectin-1a OS=Mus musculus GN=Itln1 PE=1 SV=1	1	8.9	0	88634	90761	151700	122720	76403	103050	52596	51887	43311	64041	82754	51118	60242	95138	59422	63698
Q8K1T1	Q8K1T1	Leucine-rich repeat-containing protein 25	Lrrc25	sp|Q8K1T1|LRC25_MOUSE Leucine-rich repeat-containing protein 25 OS=Mus musculus GN=Lrrc25 PE=1 SV=1	2	11.4	0	80710	56741	100730	68591	74311	82669	80443	72653	65083	60111	67910	56696	69569	84423	100500	83169
Q91VW9;Q5SZT6	Q91VW9;Q5SZT6	Zinc finger protein with KRAB and SCAN domains 3	Zkscan3;Zkscan4	sp|Q91VW9|ZKSC3_MOUSE Zinc finger protein with KRAB and SCAN domains 3 OS=Mus musculus GN=Zkscan3 PE=2 SV=1;tr|Q5SZT6|Q5SZT6_MOUSE MCG23028 OS=Mus musculus GN=Zkscan4 PE=4 SV=1	2	5.8	0	67133	76055	99248	50313	77856	39165	93485	76313	88423	77002	61562	64037	95708	66733	102020	90014
Q3TD16	Q3TD16	Uncharacterized protein KIAA0226-like	Kiaa0226l	sp|Q3TD16|K226L_MOUSE Uncharacterized protein KIAA0226-like OS=Mus musculus GN=Kiaa0226l PE=1 SV=2	1	1.5	0	64240	54136	103700	73464	67547	126770	65859	51886	72049	52415	76998	76195	77821	109500	84221	70916
O35657	O35657	Sialidase-1	Neu1	sp|O35657|NEUR1_MOUSE Sialidase-1 OS=Mus musculus GN=Neu1 PE=1 SV=1	3	9.5	0	73596	87157	92666	61047	75379	132610	105670	81772	56394	54760	62080	68772	72332	51672	76898	74003
Q6NXH8	Q6NXH8	Methyltransferase-like protein 25	Mettl25	sp|Q6NXH8|MET25_MOUSE Methyltransferase-like protein 25 OS=Mus musculus GN=Mettl25 PE=2 SV=1	1	2.2	0	79734	84224	82366	60859	64353	75760	94460	69304	73325	72142	68629	66726	93518	52441	90121	78380
Q9CQZ7	Q9CQZ7	DNA-directed RNA polymerase III subunit RPC10	Polr3k	sp|Q9CQZ7|RPC10_MOUSE DNA-directed RNA polymerase III subunit RPC10 OS=Mus musculus GN=Polr3k PE=2 SV=1	2	35.2	0	86084	88966	112420	38286	65726	55765	78763	80880	71040	91205	68431	53883	86723	66198	104200	86032
Q06219	Q06219	Nuclear receptor subfamily 4 group A member 2	Nr4a2	sp|Q06219|NR4A2_MOUSE Nuclear receptor subfamily 4 group A member 2 OS=Mus musculus GN=Nr4a2 PE=1 SV=1	2	3.7	0	104680	99591	105760	47059	77917	36171	92480	84831	78776	81991	85325	40153	86376	49458	109510	80599
Q9CRC6	Q9CRC6	UPF0693 protein C10orf32 homolog		sp|Q9CRC6|CJ032_MOUSE UPF0693 protein C10orf32 homolog OS=Mus musculus PE=1 SV=1	1	16.2	0	90917	76131	119930	48633	72601	42446	83663	74699	85225	116480	52279	50689	87345	58159	97042	98362
Q68FE6	Q68FE6	Protein FAM65A	Fam65a	sp|Q68FE6|FA65A_MOUSE Protein FAM65A OS=Mus musculus GN=Fam65a PE=1 SV=2	4	4.2	0	79453	77144	97879	56903	67118	63776	104820	92658	78626	76049	60493	44030	66810	69285	108040	91382
Q9CQR5	Q9CQR5	Zinc finger matrin-type protein 5	Zmat5	sp|Q9CQR5|ZMAT5_MOUSE Zinc finger matrin-type protein 5 OS=Mus musculus GN=Zmat5 PE=2 SV=1	3	22.4	0	80352	84617	83895	57144	80510	67716	91783	67137	80312	68527	69617	53569	83579	73154	93909	80144
Q8CIM3	Q8CIM3	D-2-hydroxyglutarate dehydrogenase, mitochondrial	D2hgdh	sp|Q8CIM3|D2HDH_MOUSE D-2-hydroxyglutarate dehydrogenase, mitochondrial OS=Mus musculus GN=D2hgdh PE=1 SV=3	1	3.2	0	96330	78413	103580	56602	66971	64153	86514	73273	80445	61545	64437	63449	74651	74385	97403	79004
P29387;Q61011	P29387	Guanine nucleotide-binding protein subunit beta-4	Gnb4	sp|P29387|GBB4_MOUSE Guanine nucleotide-binding protein subunit beta-4 OS=Mus musculus GN=Gnb4 PE=2 SV=4	9	39.1	0	90547	88309	85315	44109	79644	67624	104570	67855	93010	76089	62197	44515	108000	60053	97736	73489
E9QAF4	E9QAF4		Phldb3	tr|E9QAF4|E9QAF4_MOUSE Protein Phldb3 OS=Mus musculus GN=Phldb3 PE=4 SV=1	2	4.3	0	77554	81121	90153	52976	65193	75742	85826	73978	86539	73587	62254	61607	86980	69362	96056	79101
Q8R310	Q8R310	Transmembrane and coiled-coil domains protein 3	Tmcc3	sp|Q8R310|TMCC3_MOUSE Transmembrane and coiled-coil domains protein 3 OS=Mus musculus GN=Tmcc3 PE=1 SV=2	2	7.8	0	86419	81677	91671	44895	65159	76369	85599	69991	67918	71278	76801	50812	75251	88923	116470	83769
Q7TN02	Q7TN02	Mediator of RNA polymerase II transcription subunit 26	Med26	sp|Q7TN02|MED26_MOUSE Mediator of RNA polymerase II transcription subunit 26 OS=Mus musculus GN=Med26 PE=2 SV=1	1	2.2	0	89136	90071	99895	51410	76375	52151	86567	84199	82259	73064	66834	65908	78741	61894	88758	77976
P84444	P84444	C-C motif chemokine 21a	Ccl21a	sp|P84444|CC21A_MOUSE C-C motif chemokine 21a OS=Mus musculus GN=Ccl21a PE=1 SV=1	1	12.8	0	75302	71224	111080	63418	74105	85826	68773	61065	66498	65394	82502	62913	86277	76346	88507	81008
Q9CX30	Q9CX30	Protein YIF1B	Yif1b	sp|Q9CX30|YIF1B_MOUSE Protein YIF1B OS=Mus musculus GN=Yif1b PE=1 SV=2	1	8	0	61232	68354	96481	80379	63024	96748	75189	74561	52072	48995	79680	99532	94438	89534	80566	72597
Q7TT50	Q7TT50	Serine/threonine-protein kinase MRCK beta	Cdc42bpb	sp|Q7TT50|MRCKB_MOUSE Serine/threonine-protein kinase MRCK beta OS=Mus musculus GN=Cdc42bpb PE=1 SV=2	3	2.2	0	70648	74686	95255	47832	63203	92958	95103	58331	73933	66036	75849	62208	84928	105650	96974	71946
Q8R023	Q8R023	Polycomb group RING finger protein 1	Pcgf1	sp|Q8R023|PCGF1_MOUSE Polycomb group RING finger protein 1 OS=Mus musculus GN=Pcgf1 PE=2 SV=2	2	8.5	0	87107	69576	99736	52809	69262	53293	98963	84218	62826	84793	67288	58154	86429	64916	98268	100560
Q9D061	Q9D061	Acyl-CoA-binding domain-containing protein 6	Acbd6	sp|Q9D061|ACBD6_MOUSE Acyl-CoA-binding domain-containing protein 6 OS=Mus musculus GN=Acbd6 PE=2 SV=2	3	12.8	0	89824	78576	103120	56540	64558	52911	106280	83537	83349	88939	64225	56031	75616	58255	94204	82240
Q9JIW4	Q9JIW4	DNA-directed DNA/RNA polymerase mu	Polm	sp|Q9JIW4|DPOLM_MOUSE DNA-directed DNA/RNA polymerase mu OS=Mus musculus GN=Polm PE=1 SV=2	3	11.1	0	81727	70033	83867	59661	81220	72767	118870	95311	65805	62572	47100	36694	92099	72726	123380	101160
Q5FWI3	Q5FWI3	Transmembrane protein 2	Tmem2	sp|Q5FWI3|TMEM2_MOUSE Transmembrane protein 2 OS=Mus musculus GN=Tmem2 PE=1 SV=1	4	5	0	71194	66558	89794	67295	71284	75788	74925	83227	63899	52463	81166	57175	89746	96218	98481	93353
Q80VL3	Q80VL3	Prickle-like protein 3	Prickle3	sp|Q80VL3|PRIC3_MOUSE Prickle-like protein 3 OS=Mus musculus GN=Prickle3 PE=2 SV=1	1	2.6	0	88315	111870	99957	57190	84674	58271	92582	77059	80233	68530	54798	47209	77840	54743	110810	89383
Q8BYI8	Q8BYI8	Uncharacterized protein KIAA1467	Kiaa1467	sp|Q8BYI8|K1467_MOUSE Uncharacterized protein KIAA1467 OS=Mus musculus GN=Kiaa1467 PE=2 SV=1	1	2.6	0	81385	75332	119140	69073	68730	95546	69913	64905	85818	64288	73448	62435	77955	59287	78284	86840
Q9R0G6	Q9R0G6	Cartilage oligomeric matrix protein	Comp	sp|Q9R0G6|COMP_MOUSE Cartilage oligomeric matrix protein OS=Mus musculus GN=Comp PE=1 SV=2	8	13.8	0	73272	67000	98209	72536	78858	70237	77516	77663	79281	66417	59746	60959	89461	76166	89910	89199
P01642	P01642	Ig kappa chain V-V region L7	Gm10881	sp|P01642|KV5A9_MOUSE Ig kappa chain V-V region L7 (Fragment) OS=Mus musculus GN=Gm10881 PE=1 SV=1	1	10.4	0	44225	46157	73511	44240	90769	92611	129780	102510	36262	51505	66930	60409	157430	125850	111280	102240
Q8C4Q9	Q8C4Q9	Transmembrane protein 154	Tmem154	sp|Q8C4Q9|TM154_MOUSE Transmembrane protein 154 OS=Mus musculus GN=Tmem154 PE=1 SV=1	2	18.8	0	95933	103470	101930	46435	66856	55940	112430	90300	83848	82049	58672	38104	62675	61768	116970	102850
Q9Z1S0	Q9Z1S0	Mitotic checkpoint serine/threonine-protein kinase BUB1 beta	Bub1b	sp|Q9Z1S0|BUB1B_MOUSE Mitotic checkpoint serine/threonine-protein kinase BUB1 beta OS=Mus musculus GN=Bub1b PE=1 SV=2	2	1.9	0	72046	67934	85590	64737	76461	96791	74595	81996	75080	48613	68324	69458	79629	97017	99521	79056
Q9D1K2	Q9D1K2	V-type proton ATPase subunit F	Atp6v1f	sp|Q9D1K2|VATF_MOUSE V-type proton ATPase subunit F OS=Mus musculus GN=Atp6v1f PE=1 SV=2	2	16.8	0	123060	75246	116440	48688	67866	52661	108450	76286	73278	81334	44587	43370	138390	55637	105070	89427
Q3V209	Q3V209	Transmembrane and ubiquitin-like domain-containing protein 2	Tmub2	sp|Q3V209|TMUB2_MOUSE Transmembrane and ubiquitin-like domain-containing protein 2 OS=Mus musculus GN=Tmub2 PE=1 SV=1	1	3.1	0	67384	74381	112300	65080	79988	85437	87510	84263	67206	61514	69871	63234	73085	65468	104140	82849
Q91ZX6	Q91ZX6	Sentrin-specific protease 2	Senp2	sp|Q91ZX6|SENP2_MOUSE Sentrin-specific protease 2 OS=Mus musculus GN=Senp2 PE=1 SV=2	1	3.4	0	76789	83251	85222	64143	77545	79700	80905	76025	74360	72790	65408	70623	72857	79373	96930	80257
Q3V009	Q3V009	Transmembrane emp24 domain-containing protein 1	Tmed1	sp|Q3V009|TMED1_MOUSE Transmembrane emp24 domain-containing protein 1 OS=Mus musculus GN=Tmed1 PE=2 SV=1	2	12.8	0	64394	49915	92997	73894	70246	106760	89906	71676	81284	54462	81572	76898	86786	97200	86752	75988
Q8BGQ6	Q8BGQ6	EF-hand calcium-binding domain-containing protein 14	Efcab14	sp|Q8BGQ6|EFC14_MOUSE EF-hand calcium-binding domain-containing protein 14 OS=Mus musculus GN=Efcab14 PE=2 SV=1	2	5.2	0	77963	103960	107940	56271	78577	59159	87721	78597	92476	73212	66036	53085	74185	63437	96746	97348
Q6P9P0	Q6P9P0	Protein FAM178A	Fam178a	sp|Q6P9P0|F178A_MOUSE Protein FAM178A OS=Mus musculus GN=Fam178a PE=2 SV=2	2	2.8	0	108130	70902	91135	74331	71915	84181	78176	61953	70480	63129	64925	72255	84075	91663	88266	78159
Q9ESJ4	Q9ESJ4	NCK-interacting protein with SH3 domain	Nckipsd	sp|Q9ESJ4|SPN90_MOUSE NCK-interacting protein with SH3 domain OS=Mus musculus GN=Nckipsd PE=2 SV=2	1	1.7	0	100690	94058	112750	45373	70476	52608	103270	84077	86474	95426	51188	39976	107340	54303	113680	106800
Q99K46	Q99K46	Ubiquitin carboxyl-terminal hydrolase 11	Usp11	sp|Q99K46|UBP11_MOUSE Ubiquitin carboxyl-terminal hydrolase 11 OS=Mus musculus GN=Usp11 PE=2 SV=4	3	6.1	0	83573	76330	94467	57362	78620	64128	101630	60883	86324	79558	60416	55406	89555	86551	106050	95145
Q9D0U1	Q9D0U1	DTW domain-containing protein 2	Dtwd2	sp|Q9D0U1|DTWD2_MOUSE DTW domain-containing protein 2 OS=Mus musculus GN=Dtwd2 PE=2 SV=1	1	4.7	0	92259	89919	100720	49180	75034	57892	97855	74824	89548	96733	53933	43857	86511	64226	128760	102250
A2A9C3	A2A9C3	Protein SZT2	Szt2	sp|A2A9C3|SZT2_MOUSE Protein SZT2 OS=Mus musculus GN=Szt2 PE=1 SV=1	4	1.5	0	93851	96660	95849	49394	72338	53864	111170	79953	78177	84381	59111	53361	93284	75174	102010	89803
Q68G58	Q68G58	DNA-(apurinic or apyrimidinic site) lyase 2	Apex2	sp|Q68G58|APEX2_MOUSE DNA-(apurinic or apyrimidinic site) lyase 2 OS=Mus musculus GN=Apex2 PE=1 SV=1	2	4.7	0	92004	89144	105940	45457	75074	62737	106990	84116	85515	68800	56790	62375	93742	65800	99218	93136
P61460	P61460	DEP domain-containing protein 5	Depdc5	sp|P61460|DEPD5_MOUSE DEP domain-containing protein 5 OS=Mus musculus GN=Depdc5 PE=1 SV=2	4	4.2	0	99542	89808	99292	42609	86161	54961	103640	86006	91721	92060	57191	41037	111170	52138	111680	108410
Q9CQE0	Q9CQE0	E3 ubiquitin-protein ligase RNF138	Rnf138	sp|Q9CQE0|RN138_MOUSE E3 ubiquitin-protein ligase RNF138 OS=Mus musculus GN=Rnf138 PE=2 SV=1	3	20	0	77996	84710	96413	51372	86506	53472	93906	75834	99783	77552	61122	62408	99722	80151	104770	83747
Q8R3H7	Q8R3H7	Heparan sulfate 2-O-sulfotransferase 1	Hs2st1	sp|Q8R3H7|HS2ST_MOUSE Heparan sulfate 2-O-sulfotransferase 1 OS=Mus musculus GN=Hs2st1 PE=1 SV=2	2	9.3	0	93899	79933	110920	53035	70253	94278	79456	72571	66512	77514	55317	58364	97635	82958	104410	94408
Q9R1R2	Q9R1R2	Tripartite motif-containing protein 3	Trim3	sp|Q9R1R2|TRIM3_MOUSE Tripartite motif-containing protein 3 OS=Mus musculus GN=Trim3 PE=1 SV=1	2	3.6	0	88495	74237	85024	53261	73480	87877	122950	86771	75488	59863	52288	55705	85362	92431	119730	89296
Q920L1	Q920L1	Fatty acid desaturase 1	Fads1	sp|Q920L1|FADS1_MOUSE Fatty acid desaturase 1 OS=Mus musculus GN=Fads1 PE=2 SV=1	3	10.7	0	73459	65557	113120	75561	62398	75828	88637	88489	64291	67784	65877	83146	78650	99309	94308	84946
Q8BX43	Q8BX43	Tumor necrosis factor receptor superfamily member 19L	Relt	sp|Q8BX43|TR19L_MOUSE Tumor necrosis factor receptor superfamily member 19L OS=Mus musculus GN=Relt PE=2 SV=2	1	2.5	0	84087	75348	129800	66349	79060	72609	85061	73142	78584	70951	68849	65334	96220	80917	87950	74466
Q3UU43	Q3UU43		Chpf2	tr|Q3UU43|Q3UU43_MOUSE MCG16489, isoform CRA_a OS=Mus musculus GN=Chpf2 PE=2 SV=1	4	6	0	78924	105170	115970	63105	74595	70596	96490	62834	79388	59674	76587	65885	83257	80647	105320	76347
Q99J21	Q99J21	Mucolipin-1	Mcoln1	sp|Q99J21|MCLN1_MOUSE Mucolipin-1 OS=Mus musculus GN=Mcoln1 PE=1 SV=1	2	10.7	0	81838	89339	99124	65746	72631	74330	98704	76643	69297	66386	67223	68088	85628	89166	92479	87655
Q9DCC7	Q9DCC7	Isochorismatase domain-containing protein 2B, mitochondrial	Isoc2b	sp|Q9DCC7|ISC2B_MOUSE Isochorismatase domain-containing protein 2B, mitochondrial OS=Mus musculus GN=Isoc2b PE=1 SV=1	2	11.9	0	65929	67970	147380	80463	64656	116720	65478	54444	76967	79785	88089	73454	82315	100980	78865	71651
Q922M7	Q922M7	Ashwin		sp|Q922M7|ASHWN_MOUSE Ashwin OS=Mus musculus PE=1 SV=1	1	7.3	0	98897	92429	119370	54776	71981	44889	102140	86980	109120	72502	81349	42870	81354	62923	115030	97181
Q9JJR5	Q9JJR5	A-kinase-interacting protein 1	Akip1	sp|Q9JJR5|AKIP1_MOUSE A-kinase-interacting protein 1 OS=Mus musculus GN=Akip1 PE=2 SV=1	2	18.9	0	82119	93348	98406	60885	71353	65918	99199	74414	75581	76184	64760	64306	90896	70642	114460	96493
A0A075B5L0;P01647;P01645;P01644;P01643	A0A075B5L0;P01647;P01645;P01644;P01643	Ig kappa chain V-V region HP 124E1;Ig kappa chain V-V region HP 93G7;Ig kappa chain V-V region HP R16.7;Ig kappa chain V-V region MOPC 173	Igkv10-95	tr|A0A075B5L0|A0A075B5L0_MOUSE Protein Igkv10-95 OS=Mus musculus GN=Igkv10-95 PE=4 SV=3;sp|P01647|KV5AE_MOUSE Ig kappa chain V-V region HP 124E1 OS=Mus musculus PE=1 SV=1;sp|P01645|KV5AC_MOUSE Ig kappa chain V-V region HP 93G7 OS=Mus musculus PE=1 SV=1;sp|	1	18.9	0	58074	69359	96740	55405	51280	145540	115680	85800	53424	48983	57075	71856	79699	146630	119500	113850
Q5FWH2;E9PZ96	Q5FWH2;E9PZ96	Putative E3 ubiquitin-protein ligase UNKL	Unkl;Gm5819	sp|Q5FWH2|UNKL_MOUSE Putative E3 ubiquitin-protein ligase UNKL OS=Mus musculus GN=Unkl PE=2 SV=2;tr|E9PZ96|E9PZ96_MOUSE Protein Gm5819 OS=Mus musculus GN=Gm5819 PE=4 SV=1	2	3.3	0	113000	98728	96983	37973	83933	44127	109730	88939	90245	89033	65908	51299	104160	54616	104990	113950
P81122	P81122	Insulin receptor substrate 2	Irs2	sp|P81122|IRS2_MOUSE Insulin receptor substrate 2 OS=Mus musculus GN=Irs2 PE=1 SV=2	2	2.1	0	90463	84169	98062	52324	78960	81243	91921	74803	96492	79164	66318	47578	90969	77702	96369	97053
Q8K305	Q8K305	Kinetochore-associated protein NSL1 homolog	Nsl1	sp|Q8K305|NSL1_MOUSE Kinetochore-associated protein NSL1 homolog OS=Mus musculus GN=Nsl1 PE=2 SV=1	3	15.7	0	77753	85279	122870	63879	68658	77185	105470	65493	78087	69330	62672	52935	97616	86834	94765	100370
P11688	P11688	Integrin alpha-5;Integrin alpha-5 heavy chain;Integrin alpha-5 light chain	Itga5	sp|P11688|ITA5_MOUSE Integrin alpha-5 OS=Mus musculus GN=Itga5 PE=1 SV=3	4	8	0	73912	77397	119800	71846	69203	77062	80482	83082	77288	59861	80830	71552	81087	94794	92667	84852
Q8VBZ0	Q8VBZ0	Dehydrogenase/reductase SDR family member on chromosome X homolog	Dhrsx	sp|Q8VBZ0|DHRSX_MOUSE Dehydrogenase/reductase SDR family member on chromosome X homolog OS=Mus musculus GN=Dhrsx PE=2 SV=2	2	11.3	0	78107	79470	119440	87124	88189	73449	67723	74038	84389	75643	78750	61895	91773	68254	88021	79914
Q80ZU0	Q80ZU0	ADP-ribosylation factor-like protein 5A	Arl5a	sp|Q80ZU0|ARL5A_MOUSE ADP-ribosylation factor-like protein 5A OS=Mus musculus GN=Arl5a PE=2 SV=1	1	7.3	0	89857	85437	107920	57210	73528	68857	85316	78097	89340	79237	66585	56127	87229	77526	107660	94599
Q8BH47	Q8BH47	Vesicle-trafficking protein SEC22a	Sec22a	sp|Q8BH47|SC22A_MOUSE Vesicle-trafficking protein SEC22a OS=Mus musculus GN=Sec22a PE=2 SV=1	1	3.6	0	82383	76377	121770	78967	65331	86526	84934	62054	67150	66470	69435	67990	91663	87166	113300	84968
Q9CPN9	Q9CPN9		2210010C04Rik	tr|Q9CPN9|Q9CPN9_MOUSE Protein 2210010C04Rik OS=Mus musculus GN=2210010C04Rik PE=2 SV=1	1	4.9	0	82893	76120	91848	76510	82412	75953	81276	72463	69115	90894	92283	78185	88217	91136	77195	72221
A2ACJ2	A2ACJ2	Fanconi anemia-associated protein of 100 kDa	Faap100	sp|A2ACJ2|FP100_MOUSE Fanconi anemia-associated protein of 100 kDa OS=Mus musculus GN=Faap100 PE=2 SV=1	3	5.2	0	92343	86682	105760	58331	92639	64548	101280	73726	82882	75625	79712	44719	92152	71623	108140	98780
O35969	O35969	Guanidinoacetate N-methyltransferase	Gamt	sp|O35969|GAMT_MOUSE Guanidinoacetate N-methyltransferase OS=Mus musculus GN=Gamt PE=1 SV=1	3	20.8	0	96921	85796	108550	71710	74849	99926	89983	63354	82365	70521	80095	50426	92569	79682	92726	80685
Q06507	Q06507	Cyclic AMP-dependent transcription factor ATF-4	Atf4	sp|Q06507|ATF4_MOUSE Cyclic AMP-dependent transcription factor ATF-4 OS=Mus musculus GN=Atf4 PE=1 SV=2	2	7.4	0	78683	130940	119630	53347	77860	55846	95433	107530	92195	58893	60951	53162	91733	67678	130120	85929
Q8CDC7	Q8CDC7	Zinc finger and BTB domain-containing protein 9	Zbtb9	sp|Q8CDC7|ZBTB9_MOUSE Zinc finger and BTB domain-containing protein 9 OS=Mus musculus GN=Zbtb9 PE=2 SV=1	2	11.3	0	75753	77087	101540	73916	87921	67628	90831	68975	83825	73366	70520	81052	97228	75638	97555	93203
A0A075B5W6	A0A075B5W6		Ighv1-55	tr|A0A075B5W6|A0A075B5W6_MOUSE Protein Ighv1-55 (Fragment) OS=Mus musculus GN=Ighv1-55 PE=4 SV=1	2	47.9	0	38605	30342	78368	43013	51865	259490	96225	72658	27566	64108	134170	50341	77874	319450	144220	247490
Q9Z2F6	Q9Z2F6	B-cell lymphoma 3 protein homolog	Bcl3	sp|Q9Z2F6|BCL3_MOUSE B-cell lymphoma 3 protein homolog OS=Mus musculus GN=Bcl3 PE=1 SV=2	2	7.4	0	92433	85188	108540	59129	66121	68602	110110	87353	75615	83654	61696	55132	87418	87128	118570	102200
P58544	P58544	BTB/POZ domain-containing protein 1	Btbd1	sp|P58544|BTBD1_MOUSE BTB/POZ domain-containing protein 1 OS=Mus musculus GN=Btbd1 PE=2 SV=3	2	6.8	0	99549	81775	116910	44344	71918	66723	99811	78295	95776	87641	70030	63210	92559	78512	106240	96495
O08911	O08911	Mitogen-activated protein kinase 12	Mapk12	sp|O08911|MK12_MOUSE Mitogen-activated protein kinase 12 OS=Mus musculus GN=Mapk12 PE=1 SV=1	2	11.7	0	91971	89424	112630	51906	81208	66256	100700	84476	91366	66544	72641	54825	93186	70536	129310	103320
Q9D187	Q9D187	Mitotic spindle-associated MMXD complex subunit MIP18	Fam96b	sp|Q9D187|MIP18_MOUSE Mitotic spindle-associated MMXD complex subunit MIP18 OS=Mus musculus GN=Fam96b PE=2 SV=1	2	25.8	0	92564	87055	106430	58340	93732	59479	96680	78568	84527	90235	67978	51893	128320	62181	105050	100920
Q8BH93	Q8BH93	MAPK-interacting and spindle-stabilizing protein-like	Mapk1ip1l	sp|Q8BH93|MISSL_MOUSE MAPK-interacting and spindle-stabilizing protein-like OS=Mus musculus GN=Mapk1ip1l PE=2 SV=3	1	10.3	0	82458	117250	76638	64556	125080	37182	123880	96342	91599	165660	50960	40304	86257	76625	107270	82671
Q91W67	Q91W67	Ubiquitin-like protein 7	Ubl7	sp|Q91W67|UBL7_MOUSE Ubiquitin-like protein 7 OS=Mus musculus GN=Ubl7 PE=1 SV=2	4	19.7	0	117620	93708	106660	50768	80311	56022	111220	97774	103970	110200	63114	40969	102340	58528	103060	90956
Q80UW5	Q80UW5	Serine/threonine-protein kinase MRCK gamma	Cdc42bpg	sp|Q80UW5|MRCKG_MOUSE Serine/threonine-protein kinase MRCK gamma OS=Mus musculus GN=Cdc42bpg PE=2 SV=2	2	1.5	0	77425	72421	114460	72797	86899	76305	100730	81729	69269	65437	74123	70906	83459	89193	108470	99880
P35419	P35419	Thyroid peroxidase	Tpo	sp|P35419|PERT_MOUSE Thyroid peroxidase OS=Mus musculus GN=Tpo PE=2 SV=1	1	1.1	0	85931	83418	115470	64256	84928	82154	82966	83389	83100	74292	71597	62732	94796	80022	103930	90054
Q9DBA6	Q9DBA6	Peroxisomal leader peptide-processing protease;Peroxisomal leader peptide-processing protease, 10 kDa form;Peroxisomal leader peptide-processing protease, 49 kDa form	Tysnd1	sp|Q9DBA6|TYSD1_MOUSE Peroxisomal leader peptide-processing protease OS=Mus musculus GN=Tysnd1 PE=1 SV=1	1	3.2	0	73469	72666	101710	121220	84677	103340	91334	75898	64325	65698	81260	102620	88380	67769	85984	71234
Q9D8C9	Q9D8C9	Purine nucleoside phosphorylase	Pnp2	tr|Q9D8C9|Q9D8C9_MOUSE Protein Pnp2 OS=Mus musculus GN=Pnp2 PE=2 SV=1	6	31.1	0	77434	63009	95531	67115	87962	114030	107000	85474	71604	66491	81954	55736	74288	104240	109330	103270
Q9JKB3	Q9JKB3	Y-box-binding protein 3	Ybx3	sp|Q9JKB3|YBOX3_MOUSE Y-box-binding protein 3 OS=Mus musculus GN=Ybx3 PE=1 SV=2	5	21.3	0	97186	94743	115550	50543	87360	59818	110290	90409	84554	96225	66380	52691	92113	63764	116700	102940
Q8R124	Q8R124	Kelch-like protein 36	Klhl36	sp|Q8R124|KLH36_MOUSE Kelch-like protein 36 OS=Mus musculus GN=Klhl36 PE=2 SV=1	1	2.3	0	105280	110510	134040	54444	68340	57185	102220	85386	83380	94343	65493	46026	100130	63623	125660	105360
Q64163	Q64163	Transcription factor Dp-2	Tfdp2	sp|Q64163|TFDP2_MOUSE Transcription factor Dp-2 OS=Mus musculus GN=Tfdp2 PE=1 SV=2	1	4	0	102900	84353	112040	54140	79661	62473	120200	79368	106650	89109	65849	52390	82398	74895	117930	97786
Q9JKC7	Q9JKC7	AP-4 complex subunit mu-1	Ap4m1	sp|Q9JKC7|AP4M1_MOUSE AP-4 complex subunit mu-1 OS=Mus musculus GN=Ap4m1 PE=2 SV=1	2	6	0	89483	80569	112010	48166	81867	128420	99849	97158	97071	83604	58967	43996	89116	76139	111550	98969
Q91YE3	Q91YE3	Egl nine homolog 1	Egln1	sp|Q91YE3|EGLN1_MOUSE Egl nine homolog 1 OS=Mus musculus GN=Egln1 PE=2 SV=2	4	10.5	0	114460	88237	113490	51420	91570	50658	97938	88181	95855	95947	70448	53475	97590	72201	117140	93806
Q8BUR3	Q8BUR3	Forkhead box protein J3	Foxj3	sp|Q8BUR3|FOXJ3_MOUSE Forkhead box protein J3 OS=Mus musculus GN=Foxj3 PE=1 SV=1	1	3	0	115020	116420	147910	58448	85943	37622	104460	86089	72530	109430	61342	50326	101680	66667	122280	98764
Q8CCH2	Q8CCH2	NHL repeat-containing protein 3	Nhlrc3	sp|Q8CCH2|NHLC3_MOUSE NHL repeat-containing protein 3 OS=Mus musculus GN=Nhlrc3 PE=2 SV=1	3	14.4	0	101930	91469	111140	52449	84890	68637	112580	86693	98264	71007	65301	57668	98990	80581	110220	97595
Q80W14	Q80W14	Pre-mRNA-processing factor 40 homolog B	Prpf40b	sp|Q80W14|PR40B_MOUSE Pre-mRNA-processing factor 40 homolog B OS=Mus musculus GN=Prpf40b PE=2 SV=2	5	5.9	0	82154	102100	101230	60411	79872	72186	100530	73399	94544	66921	71792	65639	104910	89394	117780	99461
Q9DC60	Q9DC60	UbiA prenyltransferase domain-containing protein 1	Ubiad1	sp|Q9DC60|UBIA1_MOUSE UbiA prenyltransferase domain-containing protein 1 OS=Mus musculus GN=Ubiad1 PE=2 SV=1	1	2.7	0	103700	91906	104680	59410	87969	84373	106630	71199	77761	76006	71479	66113	97488	80990	109900	96787
A2AHJ4	A2AHJ4	Bromodomain and WD repeat-containing protein 3	Brwd3	sp|A2AHJ4|BRWD3_MOUSE Bromodomain and WD repeat-containing protein 3 OS=Mus musculus GN=Brwd3 PE=2 SV=1	3	2	0	92842	86088	123370	70066	74320	87468	124270	85457	74631	75647	77258	53916	92547	71144	112780	94993
Q00560	Q00560	Interleukin-6 receptor subunit beta	Il6st	sp|Q00560|IL6RB_MOUSE Interleukin-6 receptor subunit beta OS=Mus musculus GN=Il6st PE=1 SV=2	3	5.8	0	74360	81863	116620	72872	70788	74589	98919	84361	75522	84126	71555	83389	87550	87501	114510	104500
Q80X66	Q80X66	BTB/POZ domain-containing protein 10	Btbd10	sp|Q80X66|BTBDA_MOUSE BTB/POZ domain-containing protein 10 OS=Mus musculus GN=Btbd10 PE=1 SV=1	2	6.9	0	83633	116010	109050	64441	95303	70879	93573	81381	88481	76539	69424	65364	108860	79848	96086	88196
Q6P8I6	Q6P8I6	Cytochrome c oxidase assembly protein COX11, mitochondrial	Cox11	sp|Q6P8I6|COX11_MOUSE Cytochrome c oxidase assembly protein COX11, mitochondrial OS=Mus musculus GN=Cox11 PE=2 SV=1	1	3.6	0	94570	94929	109980	79283	70637	75844	99850	77011	76461	76903	91839	82196	84622	75755	91193	95000
Q7TSH8	Q7TSH8	Uncharacterized protein KIAA0195	Kiaa0195	sp|Q7TSH8|K0195_MOUSE Uncharacterized protein KIAA0195 OS=Mus musculus GN=Kiaa0195 PE=2 SV=1	4	4.5	0	105580	88203	119160	63984	75664	60228	101760	74704	92118	88333	87429	59661	98878	72741	111630	98561
Q925E7	Q925E7	Serine/threonine-protein phosphatase 2A 55 kDa regulatory subunit B delta isoform	Ppp2r2d	sp|Q925E7|2ABD_MOUSE Serine/threonine-protein phosphatase 2A 55 kDa regulatory subunit B delta isoform OS=Mus musculus GN=Ppp2r2d PE=2 SV=1	11	24.3	0	119300	135550	113400	40102	75677	44891	115590	106740	101000	100270	61072	44757	112670	56270	123970	123420
P03893	P03893	NADH-ubiquinone oxidoreductase chain 2	Mtnd2	sp|P03893|NU2M_MOUSE NADH-ubiquinone oxidoreductase chain 2 OS=Mus musculus GN=Mtnd2 PE=1 SV=2	1	4.9	0	80593	88752	126930	77706	84094	65050	88813	84363	104750	58811	73405	99084	86341	69846	115030	92758
Q8CBQ5	Q8CBQ5	Phosphatidylinositol 4-kinase type 2-beta	Pi4k2b	sp|Q8CBQ5|P4K2B_MOUSE Phosphatidylinositol 4-kinase type 2-beta OS=Mus musculus GN=Pi4k2b PE=1 SV=1	1	4.5	0	75008	56963	115250	94564	60869	153430	95592	69970	58036	49277	73518	99026	91081	144840	103390	103940
P28654	P28654	Decorin	Dcn	sp|P28654|PGS2_MOUSE Decorin OS=Mus musculus GN=Dcn PE=2 SV=1	1	3.1	0	71353	89396	123500	84015	69434	90203	114890	75805	85383	65455	83239	96802	75324	74979	105090	90436
Q8CHG5	Q8CHG5	Apoptosis-resistant E3 ubiquitin protein ligase 1	Arel1	sp|Q8CHG5|AREL1_MOUSE Apoptosis-resistant E3 ubiquitin protein ligase 1 OS=Mus musculus GN=Arel1 PE=2 SV=2	2	2.9	0	76437	76250	135430	89223	69686	95412	72405	71591	72847	67911	79621	92918	100330	103060	113980	84064
Q64430	Q64430	Copper-transporting ATPase 1	Atp7a	sp|Q64430|ATP7A_MOUSE Copper-transporting ATPase 1 OS=Mus musculus GN=Atp7a PE=1 SV=3	3	3.2	0	106290	87217	117710	71255	74073	73156	97432	77879	87489	75948	70063	73529	95545	78713	110670	98097
Q571K4	Q571K4	TGF-beta-activated kinase 1 and MAP3K7-binding protein 3	Tab3	sp|Q571K4|TAB3_MOUSE TGF-beta-activated kinase 1 and MAP3K7-binding protein 3 OS=Mus musculus GN=Tab3 PE=1 SV=2	1	2.8	0	118750	98357	113970	49311	83218	65961	112090	94096	91275	97527	68915	46929	104530	64309	121580	101160
P27005	P27005	Protein S100-A8	S100a8	sp|P27005|S10A8_MOUSE Protein S100-A8 OS=Mus musculus GN=S100a8 PE=1 SV=3	1	22.5	0	81875	79867	92200	68326	72882	89869	80024	77928	126880	116750	78323	68660	128190	87517	76178	79628
Q61315	Q61315	Adenomatous polyposis coli protein	Apc	sp|Q61315|APC_MOUSE Adenomatous polyposis coli protein OS=Mus musculus GN=Apc PE=1 SV=1	3	1.5	0	128610	121390	170340	30281	79952	45707	126440	74167	181660	109270	81543	38374	88082	54432	126700	91222
Q7TT28	Q7TT28	RNA exonuclease 1 homolog	Rexo1	sp|Q7TT28|REXO1_MOUSE RNA exonuclease 1 homolog OS=Mus musculus GN=Rexo1 PE=2 SV=1	3	3.5	0	97960	89043	129730	59944	89337	77129	107920	93154	90836	76389	62221	65024	88244	75343	108770	106120
Q8K2H6	Q8K2H6	Anaphase-promoting complex subunit 10	Anapc10	sp|Q8K2H6|APC10_MOUSE Anaphase-promoting complex subunit 10 OS=Mus musculus GN=Anapc10 PE=1 SV=1	3	15.7	0	110510	122790	106740	53616	87665	68144	94240	80100	90311	75985	70462	68255	103180	71983	115490	104340
Q9JIG8	Q9JIG8	PRA1 family protein 2	Praf2	sp|Q9JIG8|PRAF2_MOUSE PRA1 family protein 2 OS=Mus musculus GN=Praf2 PE=2 SV=1	2	12.4	0	84087	89971	110840	56857	72474	86920	111450	90176	77189	77695	77289	80676	104730	97660	101410	89820
P70419	P70419	Polypeptide N-acetylgalactosaminyltransferase 3	Galnt3	sp|P70419|GALT3_MOUSE Polypeptide N-acetylgalactosaminyltransferase 3 OS=Mus musculus GN=Galnt3 PE=2 SV=3	4	7.4	0	64331	65927	133010	88179	73660	106980	109750	88580	54340	58058	103010	78786	78011	110610	114170	114240
Q6A070	Q6A070	Protein FAM179B	Fam179b	sp|Q6A070|F179B_MOUSE Protein FAM179B OS=Mus musculus GN=Fam179b PE=3 SV=3	3	3	0	86752	100420	115500	62495	87029	84881	109660	71340	97892	65402	79316	73065	92231	85090	109490	95691
P63141	P63141	Potassium voltage-gated channel subfamily A member 2	Kcna2	sp|P63141|KCNA2_MOUSE Potassium voltage-gated channel subfamily A member 2 OS=Mus musculus GN=Kcna2 PE=1 SV=1	1	3	0	102170	105220	113760	50381	84552	70428	104270	93003	98796	81213	86040	59239	99992	73220	113480	99493
P09542	P09542	Myosin light chain 3	Myl3	sp|P09542|MYL3_MOUSE Myosin light chain 3 OS=Mus musculus GN=Myl3 PE=1 SV=4	2	13.7	0	93308	87815	121880	70572	94557	60980	93732	98485	97357	78799	87307	75868	98064	69771	94100	100530
Q9ESL4	Q9ESL4	Mitogen-activated protein kinase kinase kinase MLT	Zak	sp|Q9ESL4|MLTK_MOUSE Mitogen-activated protein kinase kinase kinase MLT OS=Mus musculus GN=Zak PE=1 SV=1	2	2.5	0	91191	79658	98351	70135	83528	126810	102270	82826	74579	63590	66260	82048	90042	125540	98958	95880
Q6P4T1	Q6P4T1		Snx19	tr|Q6P4T1|Q6P4T1_MOUSE Protein Snx19 OS=Mus musculus GN=Snx19 PE=2 SV=1	1	1.3	0	103490	85842	129000	68960	69928	71185	121050	82486	87120	72415	74863	74272	105840	81907	111060	93861
Q91Y74	Q91Y74	CMP-N-acetylneuraminate-beta-galactosamide-alpha-2,3-sialyltransferase 4	St3gal4	sp|Q91Y74|SIA4C_MOUSE CMP-N-acetylneuraminate-beta-galactosamide-alpha-2,3-sialyltransferase 4 OS=Mus musculus GN=St3gal4 PE=2 SV=1	1	4.8	0	87731	63937	142320	78215	77652	89277	87727	65555	73499	58780	149840	80784	99420	112280	93850	91583
Q8BQ48	Q8BQ48	Centrosomal protein of 295 kDa	Cep295	sp|Q8BQ48|CE295_MOUSE Centrosomal protein of 295 kDa OS=Mus musculus GN=Cep295 PE=2 SV=3	4	2.9	0	100970	81422	109640	73297	80794	76018	107870	82523	86335	74381	78429	81228	104170	80501	107130	96208
Q8VEB1	Q8VEB1	G protein-coupled receptor kinase 5	Grk5	sp|Q8VEB1|GRK5_MOUSE G protein-coupled receptor kinase 5 OS=Mus musculus GN=Grk5 PE=1 SV=2	4	8.3	0	74477	82317	95173	94811	86536	97015	109840	85170	70018	82413	68746	111780	93574	91594	89085	86991
A2A690	A2A690	Protein TANC2	Tanc2	sp|A2A690|TANC2_MOUSE Protein TANC2 OS=Mus musculus GN=Tanc2 PE=1 SV=1	2	0.9	0	91715	82040	115050	62038	79351	75852	115750	95929	86042	85657	64254	64403	98493	92220	115820	112110
Q91YE8	Q91YE8	Synaptopodin-2	Synpo2	sp|Q91YE8|SYNP2_MOUSE Synaptopodin-2 OS=Mus musculus GN=Synpo2 PE=1 SV=2	1	1.3	0	104210	90122	114130	50478	90425	80921	115570	95918	98764	64166	72798	63885	99601	79789	122410	103330
Q400C8	Q400C8	Archaemetzincin-2	Amz2	sp|Q400C8|AMZ2_MOUSE Archaemetzincin-2 OS=Mus musculus GN=Amz2 PE=2 SV=1	3	8.1	0	117370	98023	100880	64982	85841	63974	118170	101120	112990	88323	78084	47101	99678	68490	119840	92705
O70433	O70433	Four and a half LIM domains protein 2	Fhl2	sp|O70433|FHL2_MOUSE Four and a half LIM domains protein 2 OS=Mus musculus GN=Fhl2 PE=1 SV=1	2	10.4	0	110530	95782	120120	60865	90490	58919	91151	90555	108490	85589	80273	61657	107050	68034	117310	106340
Q8BVH9	Q8BVH9	Methyltransferase-like protein 6	Mettl6	sp|Q8BVH9|METL6_MOUSE Methyltransferase-like protein 6 OS=Mus musculus GN=Mettl6 PE=2 SV=2	1	3.9	0	106460	88235	120320	59092	88476	71618	106080	94666	91601	77585	76951	72152	91245	86663	108400	102450
Q08639	Q08639	Transcription factor Dp-1	Tfdp1	sp|Q08639|TFDP1_MOUSE Transcription factor Dp-1 OS=Mus musculus GN=Tfdp1 PE=1 SV=1	2	11	0	100770	113990	118690	49997	87865	72976	103120	93930	97223	82820	60377	58554	105330	89361	121450	111530
Q91X76	Q91X76		Nt5dc2	tr|Q91X76|Q91X76_MOUSE 5-nucleotidase domain containing 2 OS=Mus musculus GN=Nt5dc2 PE=2 SV=1	2	5.9	0	65046	136440	119690	103450	67090	131670	102690	70487	52493	41214	93627	109900	84455	153360	98135	80980
Q8VE09	Q8VE09	Tetratricopeptide repeat protein 39C	Ttc39c	sp|Q8VE09|TT39C_MOUSE Tetratricopeptide repeat protein 39C OS=Mus musculus GN=Ttc39c PE=2 SV=2	1	2.4	0	84320	99733	128380	62539	87706	116140	103450	75814	91960	64064	78267	67087	95102	100910	98725	102530
Q8BWH0	Q8BWH0	Putative sodium-coupled neutral amino acid transporter 7	Slc38a7	sp|Q8BWH0|S38A7_MOUSE Putative sodium-coupled neutral amino acid transporter 7 OS=Mus musculus GN=Slc38a7 PE=1 SV=1	1	2.8	0	77687	90326	134930	75732	82816	98652	108900	73375	79964	63726	85187	86491	101690	92285	111980	89838
Q7TNK4	Q7TNK4		Zfp397	tr|Q7TNK4|Q7TNK4_MOUSE Protein Zfp397 OS=Mus musculus GN=Zfp397 PE=2 SV=1	3	10.1	0	84402	85753	114220	78672	72839	92079	102530	81958	75519	70494	98680	92539	95039	98821	104600	96637
Q3UGP8	Q3UGP8	Putative Dol-P-Glc:Glc(2)Man(9)GlcNAc(2)-PP-Dol alpha-1,2-glucosyltransferase	Alg10b	sp|Q3UGP8|AG10B_MOUSE Putative Dol-P-Glc:Glc(2)Man(9)GlcNAc(2)-PP-Dol alpha-1,2-glucosyltransferase OS=Mus musculus GN=Alg10b PE=2 SV=1	1	3.8	0	100790	83370	122000	84753	81507	85821	82902	78896	75539	76045	84123	75694	86941	116760	118790	97103
Q9QUK4	Q9QUK4	Baculoviral IAP repeat-containing protein 1b	Naip2	sp|Q9QUK4|BIR1B_MOUSE Baculoviral IAP repeat-containing protein 1b OS=Mus musculus GN=Naip2 PE=1 SV=2	4	3.8	0	88839	79049	118470	70866	76977	77792	128730	102840	83731	75675	82752	63025	88524	99049	114280	118580
Q8C0K5	Q8C0K5	Graves disease carrier protein homolog	Slc25a16	sp|Q8C0K5|GDC_MOUSE Graves disease carrier protein homolog OS=Mus musculus GN=Slc25a16 PE=2 SV=1	2	7.5	0	76570	79817	131820	100740	79045	90936	107200	81815	81849	71569	96128	102540	83845	78549	105230	94580
A2AFK4	A2AFK4		Mtg2	tr|A2AFK4|A2AFK4_MOUSE GTP binding protein 5, isoform CRA_a OS=Mus musculus GN=Mtg2 PE=3 SV=1	1	4.9	0	91736	77788	126000	78757	82634	93601	80728	64403	77149	81110	81893	110600	103890	115520	107950	95485
Q61418	Q61418	H(+)/Cl(-) exchange transporter 4	Clcn4	sp|Q61418|CLCN4_MOUSE H(+)/Cl(-) exchange transporter 4 OS=Mus musculus GN=Clcn4 PE=2 SV=2	1	1.7	0	106960	84764	135040	78455	82582	80376	97935	76420	101610	76723	73855	88103	95308	78233	119300	97026
Q3ULJ3	Q3ULJ3		Upf3a	tr|Q3ULJ3|Q3ULJ3_MOUSE MCG3697, isoform CRA_c OS=Mus musculus GN=Upf3a PE=2 SV=1	2	6.4	0	120130	112700	114960	58149	91251	58880	109080	89770	98729	101900	71266	65114	99158	76418	120940	104400
O35980	O35980	Endonuclease III-like protein 1	Nthl1	sp|O35980|NTH_MOUSE Endonuclease III-like protein 1 OS=Mus musculus GN=Nthl1 PE=2 SV=2	4	22.3	0	113140	118610	126140	58650	81419	56172	129290	91575	92518	89026	68647	59672	123690	69670	126110	110770
Q91VJ2	Q91VJ2	Protein kinase C delta-binding protein	Prkcdbp	sp|Q91VJ2|PRDBP_MOUSE Protein kinase C delta-binding protein OS=Mus musculus GN=Prkcdbp PE=1 SV=1	1	4.2	0	93999	77638	105140	79970	83565	105370	103860	82619	95049	71432	82264	74314	86989	95194	120660	119420
Q8BG60	Q8BG60	Thioredoxin-interacting protein	Txnip	sp|Q8BG60|TXNIP_MOUSE Thioredoxin-interacting protein OS=Mus musculus GN=Txnip PE=1 SV=1	3	12.1	0	95817	86523	141480	85262	67039	94385	96873	85297	73934	67985	66974	84376	108180	134750	114620	98308
P25801	P25801	Rhombotin-2	Lmo2	sp|P25801|RBTN2_MOUSE Rhombotin-2 OS=Mus musculus GN=Lmo2 PE=1 SV=1	1	8.2	0	74931	64667	104430	94101	82625	145520	92844	74286	88840	71784	84797	111700	77832	144050	100150	91609
Q80XJ2	Q80XJ2	E3 ubiquitin-protein ligase RNF168	Rnf168	sp|Q80XJ2|RN168_MOUSE E3 ubiquitin-protein ligase RNF168 OS=Mus musculus GN=Rnf168 PE=2 SV=3	1	1.8	0	121720	83943	112640	59289	80987	94878	109360	90866	100500	91284	73490	57928	93147	101670	116210	111720
Q5DU02;Q8CEG8	Q5DU02;Q8CEG8	Ubiquitin carboxyl-terminal hydrolase 22;Ubiquitin carboxyl-terminal hydrolase 27	Usp22;Usp27	sp|Q5DU02|UBP22_MOUSE Ubiquitin carboxyl-terminal hydrolase 22 OS=Mus musculus GN=Usp22 PE=2 SV=2;sp|Q8CEG8|UBP27_MOUSE Ubiquitin carboxyl-terminal hydrolase 27 OS=Mus musculus GN=Usp27 PE=2 SV=2	2	5.9	0	117390	101250	108170	58604	91063	71369	132540	81437	109710	94770	70660	61844	97235	77186	113060	124220
Q8VHQ3	Q8VHQ3	Protein phosphatase 1 regulatory inhibitor subunit 16B	Ppp1r16b	sp|Q8VHQ3|PP16B_MOUSE Protein phosphatase 1 regulatory inhibitor subunit 16B OS=Mus musculus GN=Ppp1r16b PE=2 SV=1	1	1.9	0	111170	119170	116550	49443	85675	63571	115770	98882	117270	99521	74192	53266	117460	70710	127390	125770
Q01237	Q01237	3-hydroxy-3-methylglutaryl-coenzyme A reductase	Hmgcr	sp|Q01237|HMDH_MOUSE 3-hydroxy-3-methylglutaryl-coenzyme A reductase OS=Mus musculus GN=Hmgcr PE=2 SV=3	1	1.9	0	102140	96179	134160	57567	89732	93423	113700	86610	92646	89187	84150	60686	107200	85036	117340	103410
Q80YD6	Q80YD6	Secretion-regulating guanine nucleotide exchange factor	Sergef	sp|Q80YD6|SRGEF_MOUSE Secretion-regulating guanine nucleotide exchange factor OS=Mus musculus GN=Sergef PE=2 SV=2	2	9.5	0	116740	108680	109480	51972	98295	56945	135200	116150	122810	101140	59898	37736	123400	77767	133130	128890
Q80YA3	Q80YA3	Phospholipase DDHD1	Ddhd1	sp|Q80YA3|DDHD1_MOUSE Phospholipase DDHD1 OS=Mus musculus GN=Ddhd1 PE=2 SV=1	3	5.9	0	118930	95768	103990	57916	90461	92965	124890	101790	99873	73227	73841	64800	97216	78424	131970	114570
Q9CPU7	Q9CPU7	F-box only protein 32	Fbxo32	sp|Q9CPU7|FBX32_MOUSE F-box only protein 32 OS=Mus musculus GN=Fbxo32 PE=2 SV=1	1	3.9	0	126250	115580	123940	60133	106450	60184	125770	97118	105690	100690	81077	45023	113050	62046	113830	119070
F8VPP8	F8VPP8		Zc3h7b	tr|F8VPP8|F8VPP8_MOUSE Protein Zc3h7b OS=Mus musculus GN=Zc3h7b PE=1 SV=1	4	9.2	0	104190	106090	124230	49935	82888	76134	132630	84259	88867	79099	80387	59929	115430	104610	131850	122490
Q8BGX0	Q8BGX0	E3 ubiquitin-protein ligase TRIM23	Trim23	sp|Q8BGX0|TRI23_MOUSE E3 ubiquitin-protein ligase TRIM23 OS=Mus musculus GN=Trim23 PE=2 SV=1	1	1.7	0	111820	123320	111790	53674	86492	72973	137670	105360	105900	94739	70173	68993	101830	68693	118360	108910
Q8C4V4	Q8C4V4	F-box/LRR-repeat protein 3	Fbxl3	sp|Q8C4V4|FBXL3_MOUSE F-box/LRR-repeat protein 3 OS=Mus musculus GN=Fbxl3 PE=1 SV=1	2	6.5	0	90097	106400	115270	79360	83911	107600	92356	79562	96791	81435	82765	88341	93009	93161	134500	86875
Q8R2R3	Q8R2R3	Alpha- and gamma-adaptin-binding protein p34	Aagab	sp|Q8R2R3|AAGAB_MOUSE Alpha- and gamma-adaptin-binding protein p34 OS=Mus musculus GN=Aagab PE=2 SV=2	2	9.2	0	95181	98853	120220	69089	97253	69605	121960	98311	87345	93911	71233	60857	95776	89936	136930	128640
Q9D0V8	Q9D0V8	Cyclin-dependent kinase 2-interacting protein	Cinp	sp|Q9D0V8|CINP_MOUSE Cyclin-dependent kinase 2-interacting protein OS=Mus musculus GN=Cinp PE=2 SV=1	2	9	0	111260	103900	119850	61881	81878	83107	115050	91596	97673	95612	73535	53357	112170	78707	139430	125110
Q8R3W2;Q9CQP2	Q8R3W2;Q9CQP2	Trafficking protein particle complex subunit 2	0610009B22Rik;Trappc2	tr|Q8R3W2|Q8R3W2_MOUSE MCG6979, isoform CRA_a OS=Mus musculus GN=0610009B22Rik PE=2 SV=1;sp|Q9CQP2|TPPC2_MOUSE Trafficking protein particle complex subunit 2 OS=Mus musculus GN=Trappc2 PE=1 SV=1	1	10	0	111070	124680	137110	53206	82794	72270	117700	104120	96622	114910	72286	53511	118460	65334	130080	110650
P29595	P29595	NEDD8	Nedd8	sp|P29595|NEDD8_MOUSE NEDD8 OS=Mus musculus GN=Nedd8 PE=1 SV=2	3	28.4	0	181830	139690	130380	41453	86393	43130	132490	110990	117930	120570	64904	35866	153470	55730	135120	126140
O88324	O88324	CD83 antigen	Cd83	sp|O88324|CD83_MOUSE CD83 antigen OS=Mus musculus GN=Cd83 PE=2 SV=1	1	7.7	0	129410	100980	125220	67427	87053	59114	137550	109550	107200	102970	61690	68074	111680	63012	132430	107000
P00848	P00848	ATP synthase subunit a	Mtatp6	sp|P00848|ATP6_MOUSE ATP synthase subunit a OS=Mus musculus GN=Mtatp6 PE=2 SV=1	1	4.4	0	104040	82934	130260	104450	71227	90355	84298	90910	89716	79957	97136	92990	87389	94459	148610	86170
E9Q9B3	E9Q9B3		Spryd3	tr|E9Q9B3|E9Q9B3_MOUSE Protein Spryd3 OS=Mus musculus GN=Spryd3 PE=4 SV=1	2	8.1	0	107910	98549	126110	58127	85371	107290	112990	86940	85630	77597	77760	62386	108270	100510	129520	126040
Q91W82;P52483	Q91W82;P52483	Ubiquitin-conjugating enzyme E2 E2;Ubiquitin-conjugating enzyme E2 E3	Ube2e2;Ube2e3	sp|Q91W82|UB2E2_MOUSE Ubiquitin-conjugating enzyme E2 E2 OS=Mus musculus GN=Ube2e2 PE=2 SV=1;sp|P52483|UB2E3_MOUSE Ubiquitin-conjugating enzyme E2 E3 OS=Mus musculus GN=Ube2e3 PE=1 SV=2	2	14.4	0	108210	105940	130360	58000	82654	92615	119690	110130	93929	94427	68988	61113	110700	78389	136650	111200
B8JK39	B8JK39	Integrin alpha-9	Itga9	sp|B8JK39|ITA9_MOUSE Integrin alpha-9 OS=Mus musculus GN=Itga9 PE=1 SV=1	3	4.3	0	65821	89309	129700	89421	93804	118650	121470	90634	76850	60015	89302	82074	97652	111820	121440	117530
Q6ZQJ5	Q6ZQJ5	DNA replication ATP-dependent helicase/nuclease DNA2;DNA replication nuclease DNA2;DNA replication ATP-dependent helicase DNA2	Dna2	sp|Q6ZQJ5|DNA2_MOUSE DNA replication ATP-dependent helicase/nuclease DNA2 OS=Mus musculus GN=Dna2 PE=1 SV=2	4	4.9	0	91815	79012	118540	83266	82339	111660	86936	73898	117770	73938	100160	92976	98240	133470	105780	94694
Q80TZ3	Q80TZ3	Putative tyrosine-protein phosphatase auxilin	Dnajc6	sp|Q80TZ3|AUXI_MOUSE Putative tyrosine-protein phosphatase auxilin OS=Mus musculus GN=Dnajc6 PE=2 SV=2	3	3.4	0	110150	102690	131280	72582	70529	99877	111420	80841	93421	85241	82874	78771	119530	101400	110620	95983
Q9D081	Q9D081	UDP-N-acetylglucosamine transferase subunit ALG14 homolog	Alg14	sp|Q9D081|ALG14_MOUSE UDP-N-acetylglucosamine transferase subunit ALG14 homolog OS=Mus musculus GN=Alg14 PE=2 SV=1	2	9.7	0	96558	99953	138400	76036	77916	111970	101090	91698	104300	66288	94162	84641	87771	91209	115730	110320
O09005	O09005	Sphingolipid delta(4)-desaturase DES1	Degs1	sp|O09005|DEGS1_MOUSE Sphingolipid delta(4)-desaturase DES1 OS=Mus musculus GN=Degs1 PE=2 SV=1	1	5.3	0	100510	84846	110610	92855	88348	97508	105520	100570	96423	65876	95032	104540	100900	102840	102010	87493
Q8BXN7	Q8BXN7	Protein phosphatase 1K, mitochondrial	Ppm1k	sp|Q8BXN7|PPM1K_MOUSE Protein phosphatase 1K, mitochondrial OS=Mus musculus GN=Ppm1k PE=1 SV=1	3	9.7	0	95383	97884	121970	97115	86742	108430	78473	75557	88895	74084	101590	106290	96629	97716	108720	104270
Q8QZR4	Q8QZR4	Out at first protein homolog	Oaf	sp|Q8QZR4|OAF_MOUSE Out at first protein homolog OS=Mus musculus GN=Oaf PE=2 SV=1	2	6.4	0	93276	76788	118610	90124	98388	127420	82971	68918	93270	86589	100400	88828	104760	107340	98102	108040
B3F5L4	B3F5L4		5830411N06Rik	tr|B3F5L4|B3F5L4_MOUSE Protein 5830411N06Rik OS=Mus musculus GN=5830411N06Rik PE=2 SV=1	2	2.7	0	131690	93072	139330	71192	85986	82088	110140	94294	123190	98341	76181	75688	87332	80368	110630	103140
O55057	O55057	Retinal rod rhodopsin-sensitive cGMP 3,5-cyclic phosphodiesterase subunit delta	Pde6d	sp|O55057|PDE6D_MOUSE Retinal rod rhodopsin-sensitive cGMP 3,5-cyclic phosphodiesterase subunit delta OS=Mus musculus GN=Pde6d PE=1 SV=1	1	8	0	160000	140300	126570	42686	85239	50713	145880	101560	112940	122640	60154	42712	127760	62994	146300	155460
Q62273	Q62273	Sulfate transporter	Slc26a2	sp|Q62273|S26A2_MOUSE Sulfate transporter OS=Mus musculus GN=Slc26a2 PE=2 SV=1	4	6.8	0	108780	100850	126590	56479	82828	74729	143380	113270	100750	103730	79506	63677	111620	72699	128740	118340
P19070	P19070	Complement receptor type 2	Cr2	sp|P19070|CR2_MOUSE Complement receptor type 2 OS=Mus musculus GN=Cr2 PE=2 SV=1	3	4.4	0	51189	60440	148310	149040	73540	154350	81923	83420	77190	46230	136920	167690	87545	136610	103740	98715
Q8K0D7	Q8K0D7	Tail-anchored protein insertion receptor WRB	Wrb	sp|Q8K0D7|WRB_MOUSE Tail-anchored protein insertion receptor WRB OS=Mus musculus GN=Wrb PE=2 SV=1	1	8	0	93433	90784	130730	83096	97212	97042	114920	87603	78957	84084	84048	81284	112820	86900	122430	113790
D3YXJ0	D3YXJ0	Diacylglycerol kinase	Dgkh	tr|D3YXJ0|D3YXJ0_MOUSE Diacylglycerol kinase OS=Mus musculus GN=Dgkh PE=3 SV=1	4	5.9	0	131800	103160	131500	47215	104790	65142	137300	106560	121320	107140	72809	46508	119560	72606	151050	112100
P30658	P30658	Chromobox protein homolog 2	Cbx2	sp|P30658|CBX2_MOUSE Chromobox protein homolog 2 OS=Mus musculus GN=Cbx2 PE=1 SV=2	2	3.9	0	78792	83122	116760	72965	98945	73314	151290	106330	80951	80604	83012	58455	158460	88587	146230	129800
Q91X88	Q91X88	Protein O-linked-mannose beta-1,2-N-acetylglucosaminyltransferase 1	Pomgnt1	sp|Q91X88|PMGT1_MOUSE Protein O-linked-mannose beta-1,2-N-acetylglucosaminyltransferase 1 OS=Mus musculus GN=Pomgnt1 PE=2 SV=1	1	2.4	0	98379	88491	161100	93046	71725	96348	107420	88968	80315	78279	103150	74073	102680	94090	122090	114090
A2AI05	A2AI05	NADPH-dependent diflavin oxidoreductase 1	Ndor1	sp|A2AI05|NDOR1_MOUSE NADPH-dependent diflavin oxidoreductase 1 OS=Mus musculus GN=Ndor1 PE=2 SV=1	2	3.2	0	121760	124220	130960	63251	95904	65890	146450	113760	113590	83333	74981	50122	108560	74860	127970	114190
E9QAS7	E9QAS7		Inpp5a	tr|E9QAS7|E9QAS7_MOUSE Protein Inpp5a OS=Mus musculus GN=Inpp5a PE=4 SV=1	2	5.7	0	111810	106280	122500	70979	86114	74211	128300	96205	110040	85124	84499	62894	102900	97821	128980	107010
Q8C0Q5	Q8C0Q5		Zfp317	tr|Q8C0Q5|Q8C0Q5_MOUSE Protein Zfp317 OS=Mus musculus GN=Zfp317 PE=2 SV=1	2	4	0	113600	85891	121810	75009	98047	72087	114590	99720	101170	82563	96292	72263	104060	87159	139330	109670
Q8VCM4	Q8VCM4	Lipoyltransferase 1, mitochondrial	Lipt1	sp|Q8VCM4|LIPT_MOUSE Lipoyltransferase 1, mitochondrial OS=Mus musculus GN=Lipt1 PE=2 SV=1	2	7.5	0	103860	74149	129350	79267	94980	79095	115440	90457	79737	84848	96799	93658	121350	93971	133010	101000
Q9JI48	Q9JI48	Placenta-specific gene 8 protein	Plac8	sp|Q9JI48|PLAC8_MOUSE Placenta-specific gene 8 protein OS=Mus musculus GN=Plac8 PE=2 SV=1	1	13.4	0	34911	52582	241320	23732	46950	132310	176810	39382	804420	102130	577260	77241	29177	223270	109770	49544
Q9D8L5	Q9D8L5	Coiled-coil domain-containing protein 91	Ccdc91	sp|Q9D8L5|CCD91_MOUSE Coiled-coil domain-containing protein 91 OS=Mus musculus GN=Ccdc91 PE=2 SV=2	4	8.8	0	125930	124750	127140	52836	98843	61977	129530	110290	123450	111480	67509	58234	113910	67688	122950	138170
Q8R570	Q8R570	Synaptosomal-associated protein 47	Snap47	sp|Q8R570|SNP47_MOUSE Synaptosomal-associated protein 47 OS=Mus musculus GN=Snap47 PE=1 SV=1	4	16	0	112160	121710	140780	54742	83780	81033	120540	97328	96491	98745	85314	73403	91809	103530	127370	110000
Q920I9	Q920I9	WD repeat-containing protein 7	Wdr7	sp|Q920I9|WDR7_MOUSE WD repeat-containing protein 7 OS=Mus musculus GN=Wdr7 PE=1 SV=3	4	5.1	0	124650	114860	121140	52764	91635	85742	133840	106750	102540	97386	78984	54482	111560	83571	134710	122820
A0A075B5P8	A0A075B5P8		Ighv2-2	tr|A0A075B5P8|A0A075B5P8_MOUSE Protein Ighv2-2 (Fragment) OS=Mus musculus GN=Ighv2-2 PE=4 SV=1	1	13.8	0	85976	85043	110770	80955	90296	93500	128010	105110	89108	83257	93473	76778	112890	93855	136630	120330
Q5U4E2	Q5U4E2	Replication initiator 1	Repin1	sp|Q5U4E2|REPI1_MOUSE Replication initiator 1 OS=Mus musculus GN=Repin1 PE=1 SV=1	1	2.8	0	83290	92877	123130	94733	70721	110210	120850	90233	104860	71098	83980	98505	104020	122690	116950	107090
Q8K3K8	Q8K3K8	Optineurin	Optn	sp|Q8K3K8|OPTN_MOUSE Optineurin OS=Mus musculus GN=Optn PE=1 SV=1	2	3.3	0	124530	86779	118230	69750	99656	96558	124790	86472	85281	93749	73168	67724	126440	119170	120760	113770
O35127	O35127	Protein C10	Grcc10	sp|O35127|C10_MOUSE Protein C10 OS=Mus musculus GN=Grcc10 PE=2 SV=1	2	24.6	0	104610	112160	126750	73262	121520	68256	127800	93906	97375	158020	78941	57888	102550	86238	122690	98342
Q8K0F1	Q8K0F1	TBC1 domain family member 23	Tbc1d23	sp|Q8K0F1|TBC23_MOUSE TBC1 domain family member 23 OS=Mus musculus GN=Tbc1d23 PE=2 SV=1	4	9.8	0	120550	121720	123780	52970	106490	84133	130720	109690	107080	104920	73614	60694	107940	80721	141220	112010
Q8K2Z8	Q8K2Z8	Ubiquitin-conjugating enzyme E2 Q2	Ube2q2	sp|Q8K2Z8|UB2Q2_MOUSE Ubiquitin-conjugating enzyme E2 Q2 OS=Mus musculus GN=Ube2q2 PE=2 SV=2	4	12.7	0	122260	127590	126450	59174	89309	69603	130410	100280	94374	110530	84131	55078	122510	80811	144880	134730
Q9CQA8	Q9CQA8	Centrosomal protein of 19 kDa	Cep19	sp|Q9CQA8|CEP19_MOUSE Centrosomal protein of 19 kDa OS=Mus musculus GN=Cep19 PE=2 SV=1	2	12.9	0	106770	107600	146890	62270	103370	89972	118590	110290	122230	94898	102480	70224	88888	84413	101670	110520
O55234	O55234	Proteasome subunit beta type-5	Psmb5	sp|O55234|PSB5_MOUSE Proteasome subunit beta type-5 OS=Mus musculus GN=Psmb5 PE=1 SV=3	2	7.2	0	114540	104630	142490	74021	100590	69492	117790	108190	114810	91494	77220	66483	106820	83326	129950	129380
Q3V2Q8	Q3V2Q8	NEDD4-binding protein 2-like 1	N4bp2l1	sp|Q3V2Q8|N42L1_MOUSE NEDD4-binding protein 2-like 1 OS=Mus musculus GN=N4bp2l1 PE=2 SV=1	2	11.8	0	145140	140420	152490	51519	103200	45321	123070	106910	107400	120770	86387	43450	111300	72534	161370	147400
Q80YR9	Q80YR9	RNA-binding protein 12B-A	Rbm12b1	sp|Q80YR9|R12BA_MOUSE RNA-binding protein 12B-A OS=Mus musculus GN=Rbm12b1 PE=1 SV=2	13	18.2	0	115630	99633	124330	60048	97697	87787	122320	88750	111140	114120	76715	70915	127230	76149	142690	122420
E9Q9W4	E9Q9W4		Slc27a6	tr|E9Q9W4|E9Q9W4_MOUSE Protein Slc27a6 OS=Mus musculus GN=Slc27a6 PE=4 SV=1	4	8.1	0	113140	97962	137070	92829	84181	86653	106740	83142	107920	94037	84372	93871	105290	104580	113940	101600
Q9CZB6	Q9CZB6	Mediator of RNA polymerase II transcription subunit 7	Med7	sp|Q9CZB6|MED7_MOUSE Mediator of RNA polymerase II transcription subunit 7 OS=Mus musculus GN=Med7 PE=2 SV=2	3	22.7	0	95540	114570	135860	72001	110500	108430	105800	114790	110760	78285	92028	86184	97092	90645	109880	90913
Q52KP5	Q52KP5	NXPE family member 4	Nxpe4	sp|Q52KP5|NXPE4_MOUSE NXPE family member 4 OS=Mus musculus GN=Nxpe4 PE=2 SV=1	1	1.8	0	81690	52568	360890	86410	70121	87672	117920	75120	67843	61169	383490	97366	90743	105190	98645	90251
P43024	P43024	Cytochrome c oxidase subunit 6A1, mitochondrial	Cox6a1	sp|P43024|CX6A1_MOUSE Cytochrome c oxidase subunit 6A1, mitochondrial OS=Mus musculus GN=Cox6a1 PE=1 SV=2	2	26.1	0	94446	104670	145260	86415	113040	92547	104600	89882	89680	105190	100380	80793	102420	81241	118990	104120
A0A075B5J9;A0A075B5K3	A0A075B5J9;A0A075B5K3		Igkv17-127;Igkv17-121	tr|A0A075B5J9|A0A075B5J9_MOUSE Protein Igkv17-127 OS=Mus musculus GN=Igkv17-127 PE=4 SV=3;tr|A0A075B5K3|A0A075B5K3_MOUSE Protein Igkv17-121 OS=Mus musculus GN=Igkv17-121 PE=4 SV=3	1	15	0	61677	56512	105440	114950	75318	183570	98432	98222	75958	66470	74967	106980	131420	204800	126360	128660
Q9WUH5	Q9WUH5	Tripartite motif-containing protein 10	Trim10	sp|Q9WUH5|TRI10_MOUSE Tripartite motif-containing protein 10 OS=Mus musculus GN=Trim10 PE=2 SV=2	2	6.7	0	75286	63639	112240	72153	75993	190080	151520	127750	63467	52802	76125	83405	89792	213820	147530	153120
Q8R105	Q8R105	Vacuolar protein sorting-associated protein 37C	Vps37c	sp|Q8R105|VP37C_MOUSE Vacuolar protein sorting-associated protein 37C OS=Mus musculus GN=Vps37c PE=2 SV=1	2	9.1	0	121900	115170	127060	70717	96219	71035	126130	101540	95308	91691	81053	85587	110840	88186	125510	124270
O35448	O35448	Lysosomal thioesterase PPT2	Ppt2	sp|O35448|PPT2_MOUSE Lysosomal thioesterase PPT2 OS=Mus musculus GN=Ppt2 PE=2 SV=1	2	7	0	120560	110770	113310	66478	89184	86990	148440	93271	117580	94568	73382	76413	118950	80640	128080	123670
Q91XA5	Q91XA5	snRNA-activating protein complex subunit 2	Snapc2	sp|Q91XA5|SNPC2_MOUSE snRNA-activating protein complex subunit 2 OS=Mus musculus GN=Snapc2 PE=2 SV=1	2	10.9	0	106460	102040	146220	75887	85495	83264	122970	90616	104310	100950	74594	70189	124300	94356	146560	113140
O08599	O08599	Syntaxin-binding protein 1	Stxbp1	sp|O08599|STXB1_MOUSE Syntaxin-binding protein 1 OS=Mus musculus GN=Stxbp1 PE=1 SV=2	1	2	0	106250	113010	126770	72373	97550	75697	129150	114630	92445	75915	83745	67623	107040	103550	143610	134730
Q9CXF0	Q9CXF0	Kynureninase	Kynu	sp|Q9CXF0|KYNU_MOUSE Kynureninase OS=Mus musculus GN=Kynu PE=2 SV=3	2	4.5	0	117100	103000	123250	67885	100970	73137	132460	106520	117350	85638	75790	69924	126370	88139	147620	115190
Q9D0M2	Q9D0M2	Cell division cycle-associated protein 7	Cdca7	sp|Q9D0M2|CDCA7_MOUSE Cell division cycle-associated protein 7 OS=Mus musculus GN=Cdca7 PE=1 SV=1	2	9.7	0	92108	87485	149830	92874	111360	88011	115200	92214	86279	92355	95530	78459	111250	122340	124090	93512
P37804	P37804	Transgelin	Tagln	sp|P37804|TAGL_MOUSE Transgelin OS=Mus musculus GN=Tagln PE=1 SV=3	1	6.5	0	83672	87221	124040	78349	89315	129820	146220	117230	112060	91006	74816	54908	105070	98801	147890	126000
Q8C708	Q8C708	Transmembrane protein C16orf54 homolog		sp|Q8C708|CP054_MOUSE Transmembrane protein C16orf54 homolog OS=Mus musculus PE=1 SV=1	4	27.1	0	132660	108680	141240	85914	88774	90924	130130	106120	116920	102830	84108	68022	99075	72899	120940	99282
Q6P9L4	Q6P9L4	Ubiquitin carboxyl-terminal hydrolase 49	Usp49	sp|Q6P9L4|UBP49_MOUSE Ubiquitin carboxyl-terminal hydrolase 49 OS=Mus musculus GN=Usp49 PE=2 SV=1	1	2.5	0	93705	78031	148020	157200	66773	156190	70766	66325	67834	86373	102760	168730	138140	126440	87623	90659
P62984;J3QK04;D3YYZ2	P62984;J3QK04;D3YYZ2	Ubiquitin-60S ribosomal protein L40;Ubiquitin;60S ribosomal protein L40	Uba52;Gm7808;Gm5239	sp|P62984|RL40_MOUSE Ubiquitin-60S ribosomal protein L40 OS=Mus musculus GN=Uba52 PE=1 SV=2;tr|J3QK04|J3QK04_MOUSE MCG67952 OS=Mus musculus GN=Gm7808 PE=4 SV=1;tr|D3YYZ2|D3YYZ2_MOUSE MCG1031578 OS=Mus musculus GN=Gm5239 PE=4 SV=1	7	50	0	110960	105030	109560	61138	106080	92615	121640	94060	114680	108980	73085	72160	128700	113920	118980	120510
Q9ESD6	Q9ESD6	CKLF-like MARVEL transmembrane domain-containing protein 7	Cmtm7	sp|Q9ESD6|CKLF7_MOUSE CKLF-like MARVEL transmembrane domain-containing protein 7 OS=Mus musculus GN=Cmtm7 PE=2 SV=1	2	19.8	0	105200	104230	124940	93722	89941	97918	120680	97836	91473	99876	85114	95701	118000	100940	108430	99407
Q9QZC2	Q9QZC2	Plexin-C1	Plxnc1	sp|Q9QZC2|PLXC1_MOUSE Plexin-C1 OS=Mus musculus GN=Plxnc1 PE=1 SV=1	1	1.3	0	102000	89104	120520	83387	81008	104850	132740	89632	80051	95954	81260	99677	119490	117070	128620	127230
Q5SVL6	Q5SVL6	Rap1 GTPase-activating protein 2	Rap1gap2	sp|Q5SVL6|RPGP2_MOUSE Rap1 GTPase-activating protein 2 OS=Mus musculus GN=Rap1gap2 PE=2 SV=1	4	7.4	0	100670	107470	152520	71635	89038	103660	136870	116320	87618	81656	75674	66691	109410	102210	147030	127860
Q69ZT9	Q69ZT9	TBC1 domain family member 30	Tbc1d30	sp|Q69ZT9|TBC30_MOUSE TBC1 domain family member 30 OS=Mus musculus GN=Tbc1d30 PE=2 SV=2	3	6.3	0	128320	131040	140160	60077	100640	64090	127090	107510	112890	113050	82439	59638	125950	71544	153210	128300
Q8BWJ3	Q8BWJ3	Phosphorylase b kinase regulatory subunit alpha, liver isoform	Phka2	sp|Q8BWJ3|KPB2_MOUSE Phosphorylase b kinase regulatory subunit alpha, liver isoform OS=Mus musculus GN=Phka2 PE=1 SV=1	3	2.7	0	107280	112250	120870	87165	103190	111920	137280	110060	102530	98714	78550	67290	113730	93093	117730	97770
G3UZK1;Q9CXP8	G3UZK1;Q9CXP8	Guanine nucleotide-binding protein subunit gamma;Guanine nucleotide-binding protein G(I)/G(S)/G(O) subunit gamma-10	Gm20503;Gng10	tr|G3UZK1|G3UZK1_MOUSE Guanine nucleotide-binding protein subunit gamma OS=Mus musculus GN=Gm20503 PE=3 SV=1;sp|Q9CXP8|GBG10_MOUSE Guanine nucleotide-binding protein G(I)/G(S)/G(O) subunit gamma-10 OS=Mus musculus GN=Gng10 PE=3 SV=1	1	12	0	127190	98843	122040	74184	86912	81360	129100	112360	112720	122780	79946	73766	129810	74151	138770	117140
Q7TMV1	Q7TMV1	E3 ubiquitin-protein ligase RNF139	Rnf139	sp|Q7TMV1|RN139_MOUSE E3 ubiquitin-protein ligase RNF139 OS=Mus musculus GN=Rnf139 PE=1 SV=1	2	2.8	0	87966	98605	157450	97224	68966	130400	110650	87891	76338	90815	90783	99538	117920	137050	119210	109900
Q3U5F4	Q3U5F4	YrdC domain-containing protein, mitochondrial	Yrdc	sp|Q3U5F4|YRDC_MOUSE YrdC domain-containing protein, mitochondrial OS=Mus musculus GN=Yrdc PE=1 SV=1	3	21.8	0	138650	111940	133280	65295	118390	76738	137200	111810	120120	104150	67581	57411	120970	83441	139650	121040
Q9D0E3;Q9D7V2	Q9D0E3;Q9D7V2	LysM and putative peptidoglycan-binding domain-containing protein 1;LysM and putative peptidoglycan-binding domain-containing protein 2	Lysmd1;Lysmd2	sp|Q9D0E3|LYSM1_MOUSE LysM and putative peptidoglycan-binding domain-containing protein 1 OS=Mus musculus GN=Lysmd1 PE=2 SV=1;sp|Q9D7V2|LYSM2_MOUSE LysM and putative peptidoglycan-binding domain-containing protein 2 OS=Mus musculus GN=Lysmd2 PE=2 SV=2	2	8.8	0	129180	123930	137880	72151	89398	71368	129170	107660	118600	106380	76562	77605	118200	75344	133560	133020
Q9CXT6	Q9CXT6	Lysine-specific demethylase 8	Kdm8	sp|Q9CXT6|KDM8_MOUSE Lysine-specific demethylase 8 OS=Mus musculus GN=Kdm8 PE=2 SV=1	3	10.9	0	134810	125200	152050	52796	111920	66742	143160	119490	123990	102540	66374	58015	151560	71436	146640	126020
Q9D611	Q9D611	Osteoclast stimulatory transmembrane protein	Ocstamp	sp|Q9D611|OCSTP_MOUSE Osteoclast stimulatory transmembrane protein OS=Mus musculus GN=Ocstamp PE=1 SV=1	1	2.4	0	141770	147580	139920	36518	118690	44221	173410	134820	162460	124430	67712	55349	126170	46092	189940	154760
Q8BZ09	Q8BZ09	Mitochondrial 2-oxodicarboxylate carrier	Slc25a21	sp|Q8BZ09|ODC_MOUSE Mitochondrial 2-oxodicarboxylate carrier OS=Mus musculus GN=Slc25a21 PE=2 SV=1	1	4	0	79755	61038	149330	136980	97972	167070	91975	91635	81799	56516	117610	140160	109150	154610	98386	98858
Q9WU22	Q9WU22	Tyrosine-protein phosphatase non-receptor type 4	Ptpn4	sp|Q9WU22|PTN4_MOUSE Tyrosine-protein phosphatase non-receptor type 4 OS=Mus musculus GN=Ptpn4 PE=1 SV=2	1	1.4	0	116890	171270	134960	76060	98232	82113	122810	103260	118750	105800	74487	67954	105230	97605	119890	106150
P27699	P27699	cAMP-responsive element modulator	Crem	sp|P27699|CREM_MOUSE cAMP-responsive element modulator OS=Mus musculus GN=Crem PE=1 SV=2	1	3.9	0	119150	116320	122110	66965	117300	78144	138050	105400	103730	104730	92645	56358	132750	79770	142800	140280
Q6NXK5	Q6NXK5	RNA/RNP complex-1-interacting phosphatase	Dusp11	sp|Q6NXK5|DUS11_MOUSE RNA/RNP complex-1-interacting phosphatase OS=Mus musculus GN=Dusp11 PE=2 SV=1	3	9.7	0	113950	92531	156380	97292	92319	88395	113040	90356	100480	103180	89088	83188	123990	116530	108650	114130
Q9D9G3;Q8CBW7	Q9D9G3;Q8CBW7	Cysteine-rich hydrophobic domain-containing protein 2;Cysteine-rich hydrophobic domain-containing protein 1	Chic2;Chic1	sp|Q9D9G3|CHIC2_MOUSE Cysteine-rich hydrophobic domain-containing protein 2 OS=Mus musculus GN=Chic2 PE=2 SV=1;sp|Q8CBW7|CHIC1_MOUSE Cysteine-rich hydrophobic domain-containing protein 1 OS=Mus musculus GN=Chic1 PE=2 SV=2	2	9.7	0	129910	137190	140020	70197	95215	81139	134230	101570	110370	117220	85769	77972	104970	81250	121460	111330
P07628	P07628	Kallikrein 1-related peptidase b8	Klk1b8	sp|P07628|K1KB8_MOUSE Kallikrein 1-related peptidase b8 OS=Mus musculus GN=Klk1b8 PE=2 SV=1	1	4.6	0	109610	102310	158690	100870	90732	107630	93928	85156	126480	108380	102010	81073	116930	85088	110990	108280
O88509	O88509	DNA (cytosine-5)-methyltransferase 3B	Dnmt3b	sp|O88509|DNM3B_MOUSE DNA (cytosine-5)-methyltransferase 3B OS=Mus musculus GN=Dnmt3b PE=1 SV=2	4	8.1	0	122360	105280	133350	88416	93362	92738	115600	100730	85939	87229	94354	98695	118380	98883	127600	121000
Q99N91	Q99N91	39S ribosomal protein L34, mitochondrial	Mrpl34	sp|Q99N91|RM34_MOUSE 39S ribosomal protein L34, mitochondrial OS=Mus musculus GN=Mrpl34 PE=2 SV=1	1	10.9	0	182580	138360	112600	48372	104970	70884	157770	124970	164330	143540	55297	37935	131120	68850	148240	146460
O70394	O70394	Interleukin-27 receptor subunit alpha	Il27ra	sp|O70394|I27RA_MOUSE Interleukin-27 receptor subunit alpha OS=Mus musculus GN=Il27ra PE=2 SV=2	4	11.4	0	93887	94353	149390	113150	92195	103360	99823	90962	100380	90261	108580	102390	107030	92624	135200	112770
Q9DBU5	Q9DBU5	E3 ubiquitin-protein ligase RNF6	Rnf6	sp|Q9DBU5|RNF6_MOUSE E3 ubiquitin-protein ligase RNF6 OS=Mus musculus GN=Rnf6 PE=1 SV=1	2	6.3	0	113790	97213	127940	75641	80720	104520	116840	102980	105570	89912	86605	86233	118100	120580	129300	144180
P08074	P08074	Carbonyl reductase [NADPH] 2	Cbr2	sp|P08074|CBR2_MOUSE Carbonyl reductase [NADPH] 2 OS=Mus musculus GN=Cbr2 PE=1 SV=1	2	15.6	0	44873	61587	195290	181860	84160	150040	83331	75370	62732	53705	223610	193790	118450	149260	106780	95427
A0A075B5K2	A0A075B5K2		Igkv9-124	tr|A0A075B5K2|A0A075B5K2_MOUSE Protein Igkv9-124 OS=Mus musculus GN=Igkv9-124 PE=4 SV=3	1	18.9	0	108440	78438	123920	84289	96345	133170	119010	106730	109260	82705	120920	74994	111710	132060	106270	119330
Q8R420	Q8R420	ATP-binding cassette sub-family A member 3	Abca3	sp|Q8R420|ABCA3_MOUSE ATP-binding cassette sub-family A member 3 OS=Mus musculus GN=Abca3 PE=2 SV=3	4	3.2	0	97298	85217	143680	91217	101260	134910	113700	91241	89157	77473	99449	105040	107080	124240	129990	116470
Q61382	Q61382	TNF receptor-associated factor 4	Traf4	sp|Q61382|TRAF4_MOUSE TNF receptor-associated factor 4 OS=Mus musculus GN=Traf4 PE=1 SV=2	2	4.5	0	101000	86619	162690	87855	91441	107460	106410	98827	99605	98259	104940	95027	106460	129750	128180	101430
Q91XL3	Q91XL3	UDP-glucuronic acid decarboxylase 1	Uxs1	sp|Q91XL3|UXS1_MOUSE UDP-glucuronic acid decarboxylase 1 OS=Mus musculus GN=Uxs1 PE=2 SV=1	2	8.3	0	104850	98146	156930	105230	88946	105960	101140	88596	86248	109400	104110	98684	107070	100670	133780	113160
Q3UUV9	Q3UUV9		H2-Eb2	tr|Q3UUV9|Q3UUV9_MOUSE Histocompatibility 2, class II antigen E beta2 OS=Mus musculus GN=H2-Eb2 PE=2 SV=1	1	3.5	0	73707	75530	160130	126700	67047	180420	96475	76946	78713	79344	139030	169170	97184	136560	115570	101410
Q80YT7	Q80YT7	Myomegalin	Pde4dip	sp|Q80YT7|MYOME_MOUSE Myomegalin OS=Mus musculus GN=Pde4dip PE=2 SV=2	5	2.6	0	108690	111840	122530	74867	101900	105690	114120	108520	104340	91701	96029	71172	131140	101890	128550	143480
Q01063	Q01063	cAMP-specific 3,5-cyclic phosphodiesterase 4D	Pde4d	sp|Q01063|PDE4D_MOUSE cAMP-specific 3,5-cyclic phosphodiesterase 4D OS=Mus musculus GN=Pde4d PE=1 SV=2	2	4.1	0	131010	119430	151700	57089	108230	83512	142530	119840	112690	114140	79697	66685	117590	86242	140070	121340
P59041	P59041	DnaJ homolog subfamily C member 30	Dnajc30	sp|P59041|DJC30_MOUSE DnaJ homolog subfamily C member 30 OS=Mus musculus GN=Dnajc30 PE=2 SV=1	1	7.8	0	110260	91145	153300	82982	109270	98878	126810	102620	103850	84273	101510	91955	108790	92885	130430	129350
Q499E6	Q499E6	Uncharacterized protein C1orf109 homolog		sp|Q499E6|CA109_MOUSE Uncharacterized protein C1orf109 homolog OS=Mus musculus PE=2 SV=1	2	12	0	127390	125540	137910	76670	110890	87760	122360	100520	114750	115620	81777	77946	107970	101510	113770	121600
Q6AXC6	Q6AXC6	Probable ATP-dependent RNA helicase DDX11	Ddx11	sp|Q6AXC6|DDX11_MOUSE Probable ATP-dependent RNA helicase DDX11 OS=Mus musculus GN=Ddx11 PE=2 SV=1	3	4.5	0	131660	140200	121440	61923	119420	74569	137560	115420	123540	92886	95102	62768	109840	87261	147110	138820
Q60665	Q60665	Ski-like protein	Skil	sp|Q60665|SKIL_MOUSE Ski-like protein OS=Mus musculus GN=Skil PE=2 SV=2	1	2.2	0	110800	101260	119650	103810	127600	105950	100380	94832	91178	100260	110910	85248	113790	96265	155660	103430
Q80W88	Q80W88	Homeobox and leucine zipper protein Homez	Homez	sp|Q80W88|HOMEZ_MOUSE Homeobox and leucine zipper protein Homez OS=Mus musculus GN=Homez PE=2 SV=2	1	2.4	0	122570	115470	137150	77594	110870	84846	128820	99000	99395	85169	97156	97633	110700	115970	122860	122870
O89113	O89113	Immediate early response gene 5 protein	Ier5	sp|O89113|IER5_MOUSE Immediate early response gene 5 protein OS=Mus musculus GN=Ier5 PE=2 SV=1	1	3.9	0	157430	145240	143950	55380	102480	55628	149230	129200	130460	138230	72919	66647	132550	71045	137030	126230
E9Q444	E9Q444		Zbtb21	tr|E9Q444|E9Q444_MOUSE Protein Zbtb21 OS=Mus musculus GN=Zbtb21 PE=1 SV=1	7	11	0	127060	107760	140910	88774	97459	73497	135070	106400	107620	100990	90868	86732	127100	84282	145450	125370
Q3TA38	Q3TA38	Transmembrane protein 120B	Tmem120b	sp|Q3TA38|T120B_MOUSE Transmembrane protein 120B OS=Mus musculus GN=Tmem120b PE=2 SV=1	1	5	0	106310	130130	150070	96003	105510	103900	134130	87800	94669	91939	88016	87577	118490	92057	136170	117760
Q9D1R1	Q9D1R1	Complex I assembly factor TMEM126B, mitochondrial	Tmem126b	sp|Q9D1R1|T126B_MOUSE Complex I assembly factor TMEM126B, mitochondrial OS=Mus musculus GN=Tmem126b PE=2 SV=1	1	6.1	0	117890	102560	129470	85148	93301	108520	124800	108870	103480	91366	90710	96025	114490	110070	137060	117280
P11930	P11930	Nucleoside diphosphate-linked moiety X motif 19, mitochondrial	Nudt19	sp|P11930|NUD19_MOUSE Nucleoside diphosphate-linked moiety X motif 19, mitochondrial OS=Mus musculus GN=Nudt19 PE=1 SV=2	2	15.7	0	121010	100380	137370	86967	104700	104440	121630	102640	103680	92076	113230	80823	104610	107540	130140	121630
Q9CQ85	Q9CQ85	Mitochondrial import inner membrane translocase subunit Tim22	Timm22	sp|Q9CQ85|TIM22_MOUSE Mitochondrial import inner membrane translocase subunit Tim22 OS=Mus musculus GN=Timm22 PE=2 SV=1	1	8.2	0	145080	127950	146280	58308	113830	63191	141650	123870	102590	122930	95906	61672	130970	88828	137550	132920
P20918	P20918	Plasminogen;Plasmin heavy chain A;Activation peptide;Angiostatin;Plasmin heavy chain A, short form;Plasmin light chain B	Plg	sp|P20918|PLMN_MOUSE Plasminogen OS=Mus musculus GN=Plg PE=1 SV=3	5	8.9	0	121560	102640	114310	80993	98097	121440	115740	111900	90607	93219	91208	66332	122560	161430	141030	125910
Q60943	Q60943	Interleukin-17 receptor A	Il17ra	sp|Q60943|I17RA_MOUSE Interleukin-17 receptor A OS=Mus musculus GN=Il17ra PE=1 SV=1	2	3.2	0	147450	143780	146910	71789	94185	85636	128290	106870	101030	111840	91482	78959	124230	94445	130540	107320
Q8BIW9	Q8BIW9	Chromosome transmission fidelity protein 18 homolog	Chtf18	sp|Q8BIW9|CTF18_MOUSE Chromosome transmission fidelity protein 18 homolog OS=Mus musculus GN=Chtf18 PE=2 SV=2	3	4	0	113680	114190	136780	74854	107160	98811	128990	117540	111200	103800	85923	86068	105810	103080	123580	135210
G5E8Z2	G5E8Z2	Transcription initiation factor TFIID subunit 4B	Taf4b	sp|G5E8Z2|TAF4B_MOUSE Transcription initiation factor TFIID subunit 4B OS=Mus musculus GN=Taf4b PE=2 SV=1	5	7.6	0	131540	92603	133910	85519	114410	103310	126250	103190	102500	105880	109540	72458	108850	95405	134750	129530
Q99JW5	Q99JW5	Epithelial cell adhesion molecule	Epcam	sp|Q99JW5|EPCAM_MOUSE Epithelial cell adhesion molecule OS=Mus musculus GN=Epcam PE=2 SV=1	2	11.7	0	81546	85219	191240	81668	97359	117950	131300	106830	72141	73878	137530	85358	117530	131430	150750	134130
Q8BH82	Q8BH82	N-acyl-phosphatidylethanolamine-hydrolyzing phospholipase D	Napepld	sp|Q8BH82|NAPEP_MOUSE N-acyl-phosphatidylethanolamine-hydrolyzing phospholipase D OS=Mus musculus GN=Napepld PE=1 SV=1	2	6.1	0	144040	112120	139270	92214	101890	76641	124160	102770	103440	98827	80857	78593	137750	97726	152320	125510
P01741	P01741	Ig heavy chain V region		sp|P01741|HVM00_MOUSE Ig heavy chain V region OS=Mus musculus PE=1 SV=1	1	11.4	0	56084	93585	143230	98613	79927	190880	163070	142350	63215	91361	76064	85031	101390	221140	131940	121000
Q3UFY0	Q3UFY0	Ribosomal RNA processing protein 36 homolog	Rrp36	sp|Q3UFY0|RRP36_MOUSE Ribosomal RNA processing protein 36 homolog OS=Mus musculus GN=Rrp36 PE=2 SV=1	2	9	0	137180	133260	154080	55707	114480	55998	141100	117520	106300	138930	86980	59942	143960	85040	161730	139720
Q9ESK4	Q9ESK4	Inhibitor of growth protein 2	Ing2	sp|Q9ESK4|ING2_MOUSE Inhibitor of growth protein 2 OS=Mus musculus GN=Ing2 PE=1 SV=3	2	11.7	0	123940	120240	165700	79134	93178	79694	131730	115190	124870	95551	76692	79171	133430	102090	130110	125990
Q9D8U6	Q9D8U6	Mast cell-expressed membrane protein 1	Mcemp1	sp|Q9D8U6|MCEM1_MOUSE Mast cell-expressed membrane protein 1 OS=Mus musculus GN=Mcemp1 PE=2 SV=1	1	5.5	0	107950	84180	143280	85375	95475	180180	118480	82468	127240	104530	85062	87714	110760	144700	108540	111750
P10493	P10493	Nidogen-1	Nid1	sp|P10493|NID1_MOUSE Nidogen-1 OS=Mus musculus GN=Nid1 PE=1 SV=2	1	1.3	0	102340	104860	156380	86918	115220	105340	100190	89817	99217	94521	166300	78836	113770	115870	127190	112480
O35427	O35427	DNA-directed RNA polymerase III subunit RPC9	Crcp	sp|O35427|RPC9_MOUSE DNA-directed RNA polymerase III subunit RPC9 OS=Mus musculus GN=Crcp PE=2 SV=1	1	11.5	0	150760	127490	137500	81498	96229	70408	127300	104580	107290	109370	84932	73936	163560	86871	131550	138350
Q9CRB6	Q9CRB6	Tubulin polymerization-promoting protein family member 3	Tppp3	sp|Q9CRB6|TPPP3_MOUSE Tubulin polymerization-promoting protein family member 3 OS=Mus musculus GN=Tppp3 PE=1 SV=1	3	23.9	0	125020	122120	128820	88307	87135	74584	158900	117090	120470	91385	85587	88148	108210	93238	160490	133560
Q6PD10	Q6PD10	Inositol hexakisphosphate kinase 1	Ip6k1	sp|Q6PD10|IP6K1_MOUSE Inositol hexakisphosphate kinase 1 OS=Mus musculus GN=Ip6k1 PE=2 SV=1	2	9.7	0	151810	121100	142890	71316	99725	91652	157140	116350	124870	94044	78783	69906	120030	76243	148240	139200
Q3TB48	Q3TB48	Transmembrane protein 104	Tmem104	sp|Q3TB48|TM104_MOUSE Transmembrane protein 104 OS=Mus musculus GN=Tmem104 PE=2 SV=1	1	2.2	0	103890	100800	135570	97509	85755	126800	130070	90147	82979	78742	85931	119620	121300	147930	140960	130700
P05017	P05017	Insulin-like growth factor I	Igf1	sp|P05017|IGF1_MOUSE Insulin-like growth factor I OS=Mus musculus GN=Igf1 PE=2 SV=2	1	9.2	0	99138	85973	124680	93059	116860	139040	116060	89536	115870	93017	107670	107370	129610	108820	117290	114940
Q9CR24	Q9CR24	Nucleoside diphosphate-linked moiety X motif 8, mitochondrial	Nudt8	sp|Q9CR24|NUDT8_MOUSE Nucleoside diphosphate-linked moiety X motif 8, mitochondrial OS=Mus musculus GN=Nudt8 PE=1 SV=1	3	21.4	0	112010	116210	182270	97688	110990	113050	90455	90413	75488	81440	114570	105420	117180	114700	133880	125010
Q8BXJ2	Q8BXJ2	Transcriptional-regulating factor 1	Trerf1	sp|Q8BXJ2|TREF1_MOUSE Transcriptional-regulating factor 1 OS=Mus musculus GN=Trerf1 PE=1 SV=1	3	3.2	0	134460	111780	133190	95815	103500	97821	110170	110210	111980	106710	100420	94554	129890	92773	113060	119180
Q6IQY5	Q6IQY5	Centrosomal protein of 70 kDa	Cep70	sp|Q6IQY5|CEP70_MOUSE Centrosomal protein of 70 kDa OS=Mus musculus GN=Cep70 PE=2 SV=1	2	3.6	0	106570	93752	132200	103330	100680	106940	119990	90031	106090	100840	101450	95368	135630	107300	142590	128870
Q5XKN4	Q5XKN4	Protein jagunal homolog 1	Jagn1	sp|Q5XKN4|JAGN1_MOUSE Protein jagunal homolog 1 OS=Mus musculus GN=Jagn1 PE=2 SV=2	1	6.6	0	111810	107310	141080	101150	89815	112140	125360	95212	105230	92961	113640	101450	112310	112500	133240	112640
Q5EE38	Q5EE38	Adrenocortical dysplasia protein	Acd	sp|Q5EE38|ACD_MOUSE Adrenocortical dysplasia protein OS=Mus musculus GN=Acd PE=1 SV=1	3	12.5	0	156790	99365	156410	82431	91648	79799	116730	92650	93681	157040	92592	87409	157730	96085	126100	122280
Q6GQT6	Q6GQT6	Sterol regulatory element-binding protein cleavage-activating protein	Scap	sp|Q6GQT6|SCAP_MOUSE Sterol regulatory element-binding protein cleavage-activating protein OS=Mus musculus GN=Scap PE=1 SV=1	3	3.6	0	96828	123900	138640	78844	104250	124030	126650	107290	123520	87072	100230	98224	114220	108020	123170	120320
Q9D850	Q9D850	Transmembrane protein 68	Tmem68	sp|Q9D850|TMM68_MOUSE Transmembrane protein 68 OS=Mus musculus GN=Tmem68 PE=2 SV=1	2	6.4	0	114160	102770	180060	88035	102380	82988	130790	86963	99580	110000	93316	105630	140900	102280	125650	127820
F8VQB6	F8VQB6	Unconventional myosin-X	Myo10	sp|F8VQB6|MYO10_MOUSE Unconventional myosin-X OS=Mus musculus GN=Myo10 PE=1 SV=1	3	2.5	0	123220	122020	170790	72991	103160	104320	137380	111500	98128	111560	86489	82729	124000	93934	138510	116250
Q9JIF3	Q9JIF3	Solute carrier family 2, facilitated glucose transporter member 8	Slc2a8	sp|Q9JIF3|GTR8_MOUSE Solute carrier family 2, facilitated glucose transporter member 8 OS=Mus musculus GN=Slc2a8 PE=1 SV=2	1	2.5	0	93709	127860	136330	92461	93215	138090	112460	102280	131430	101090	92722	95147	97935	104850	128700	131520
O88843	O88843	Death domain-containing protein CRADD	Cradd	sp|O88843|CRADD_MOUSE Death domain-containing protein CRADD OS=Mus musculus GN=Cradd PE=1 SV=2	2	27.6	0	159710	130730	139100	71776	130160	64989	165740	116680	133840	108680	79068	75245	112300	76347	142580	127000
Q6P073	Q6P073	Ubiquitin-conjugating enzyme E2 J2	Ube2j2	sp|Q6P073|UB2J2_MOUSE Ubiquitin-conjugating enzyme E2 J2 OS=Mus musculus GN=Ube2j2 PE=1 SV=1	2	15.1	0	111590	94705	127170	101230	101490	119390	117710	110340	104830	72940	112130	130420	114520	109740	129830	117570
Q64362	Q64362	AKT-interacting protein	Aktip	sp|Q64362|AKTIP_MOUSE AKT-interacting protein OS=Mus musculus GN=Aktip PE=2 SV=1	2	8.6	0	147870	114050	147940	64202	110440	86030	119240	111510	123500	118770	87951	72899	125720	95028	156460	136440
Q8CF89	Q8CF89	TGF-beta-activated kinase 1 and MAP3K7-binding protein 1	Tab1	sp|Q8CF89|TAB1_MOUSE TGF-beta-activated kinase 1 and MAP3K7-binding protein 1 OS=Mus musculus GN=Tab1 PE=1 SV=2	3	12.5	0	146660	142800	155430	57499	130510	68120	147510	112940	111000	115210	78513	52773	126930	100620	185470	139800
P59281	P59281	Rho GTPase-activating protein 39	Arhgap39	sp|P59281|RHG39_MOUSE Rho GTPase-activating protein 39 OS=Mus musculus GN=Arhgap39 PE=1 SV=2	2	2.6	0	129500	109340	128000	84991	101010	86545	137800	114110	120410	89262	103890	85849	130470	110760	146010	115540
Q7TQI7	Q7TQI7	Ankyrin repeat and BTB/POZ domain-containing protein 2	Abtb2	sp|Q7TQI7|ABTB2_MOUSE Ankyrin repeat and BTB/POZ domain-containing protein 2 OS=Mus musculus GN=Abtb2 PE=2 SV=1	5	6.2	0	158760	132910	130010	66993	116130	62678	131680	132130	117130	119160	86159	76260	136450	89409	137490	141690
Q99K43	Q99K43	Protein regulator of cytokinesis 1	Prc1	sp|Q99K43|PRC1_MOUSE Protein regulator of cytokinesis 1 OS=Mus musculus GN=Prc1 PE=2 SV=2	2	3.5	0	101520	76548	151300	133610	77698	155370	121240	75292	109140	88829	98692	131710	110180	171640	110250	112490
Q9CQ88	Q9CQ88	Tetraspanin-31	Tspan31	sp|Q9CQ88|TSN31_MOUSE Tetraspanin-31 OS=Mus musculus GN=Tspan31 PE=1 SV=1	1	5.7	0	105690	90893	146330	106840	77980	131840	123970	102570	108610	76266	103910	125780	115780	140690	128890	116930
Q9D658	Q9D658	Protein tyrosine phosphatase type IVA 3	Ptp4a3	sp|Q9D658|TP4A3_MOUSE Protein tyrosine phosphatase type IVA 3 OS=Mus musculus GN=Ptp4a3 PE=1 SV=1	2	16.2	0	130590	90520	133490	113510	94798	138020	120620	86251	115910	95158	89846	100190	115110	115580	121400	135220
Q3UTJ2	Q3UTJ2	Sorbin and SH3 domain-containing protein 2	Sorbs2	sp|Q3UTJ2|SRBS2_MOUSE Sorbin and SH3 domain-containing protein 2 OS=Mus musculus GN=Sorbs2 PE=1 SV=2	3	3.5	0	83141	83172	125890	78348	85111	198160	158530	101760	85381	85613	108060	90499	91556	177440	163100	150520
Q80UW3	Q80UW3	Ras and Rab interactor-like protein	Rinl	sp|Q80UW3|RINL_MOUSE Ras and Rab interactor-like protein OS=Mus musculus GN=Rinl PE=1 SV=1	1	2.1	0	134690	122150	151900	93615	107720	82954	145970	112170	125370	109740	91699	68372	124220	85404	161120	109590
Q8BLG0	Q8BLG0	PHD finger protein 20	Phf20	sp|Q8BLG0|PHF20_MOUSE PHD finger protein 20 OS=Mus musculus GN=Phf20 PE=1 SV=2	4	9.3	0	130660	121000	150960	73581	111830	84075	140430	108160	103610	115730	108660	72532	134940	92955	149420	126820
Q0VDN7	Q0VDN7	RUN domain-containing protein 1	Rundc1	sp|Q0VDN7|RUND1_MOUSE RUN domain-containing protein 1 OS=Mus musculus GN=Rundc1 PE=2 SV=1	3	3.7	0	142000	117350	130570	66221	104430	80746	138260	119720	119580	111540	91928	71806	151950	101690	151240	140340
Q9Z0F6	Q9Z0F6	Cell cycle checkpoint control protein RAD9A	Rad9a	sp|Q9Z0F6|RAD9A_MOUSE Cell cycle checkpoint control protein RAD9A OS=Mus musculus GN=Rad9a PE=1 SV=1	4	19.5	0	154210	149890	143460	59557	110570	65555	145740	141490	133530	120260	73280	59551	147810	86492	169780	129850
A0A075B6B0;Q5R1E6;A0A075B6B9;A0A075B6B3;A0A075B5Z9;A0A075B5Z8;Q5R1I0;A0A075B6B4;A0A075B639	A0A075B6B0;Q5R1E6;A0A075B6B9;A0A075B6B3;A0A075B5Z9;A0A075B5Z8;Q5R1I0;A0A075B6B4;A0A075B639		Trav6d-7;Trav6-3;Trav6d-5;Trav6d-3;Trav6-2;Trav6-1;Trav6d-4;Trav6-4;Trav6-7-dv9	tr|A0A075B6B0|A0A075B6B0_MOUSE Protein Trav6d-7 OS=Mus musculus GN=Trav6d-7 PE=4 SV=1;tr|Q5R1E6|Q5R1E6_MOUSE Protein Trav6-3 (Fragment) OS=Mus musculus GN=Trav6-3 PE=4 SV=1;tr|A0A075B6B9|A0A075B6B9_MOUSE Protein Trav6d-5 (Fragment) OS=Mus musculus GN=Trav6	1	7.6	0	142640	127230	117760	77886	116720	103550	124110	98902	95778	105770	106920	83138	157180	113530	131060	112780
Q99N19;Q8BGU0	Q99N19		Cyp4f13	tr|Q99N19|Q99N19_MOUSE Cytochrome P450 CYP4F13 OS=Mus musculus GN=Cyp4f13 PE=2 SV=1	3	6.9	0	100680	105940	131760	86342	123220	97167	158450	114530	123190	101650	90881	84961	121920	97870	137270	141370
Q8BHD0	Q8BHD0	Ras-related protein Rab-39A	Rab39a	sp|Q8BHD0|RB39A_MOUSE Ras-related protein Rab-39A OS=Mus musculus GN=Rab39a PE=2 SV=1	4	18.4	0	66443	55148	149250	154450	82001	196840	134330	98456	66247	50855	119650	179540	120650	177110	142770	148910
Q8R4U0	Q8R4U0	Stabilin-2;Short form stabilin-2	Stab2	sp|Q8R4U0|STAB2_MOUSE Stabilin-2 OS=Mus musculus GN=Stab2 PE=1 SV=1	5	3.6	0	111420	83645	121190	92296	106590	105790	124410	112960	125530	96057	90523	101040	114930	117920	166960	151030
B1AUE5	B1AUE5	Peroxisome biogenesis factor 10	Pex10	sp|B1AUE5|PEX10_MOUSE Peroxisome biogenesis factor 10 OS=Mus musculus GN=Pex10 PE=2 SV=1	2	8.6	0	115500	103300	144850	96684	101310	101030	124740	103410	100640	96959	109640	98237	132910	117950	127370	135980
Q8R0W0	Q8R0W0	Epiplakin	Eppk1	sp|Q8R0W0|EPIPL_MOUSE Epiplakin OS=Mus musculus GN=Eppk1 PE=1 SV=2	5	6.4	0	139970	144390	173400	51410	98991	87638	185350	123920	111720	121070	119350	57319	114000	72733	160230	143930
Q9D8Z6	Q9D8Z6	Autophagy-related protein 101	Atg101	sp|Q9D8Z6|ATGA1_MOUSE Autophagy-related protein 101 OS=Mus musculus GN=Atg101 PE=2 SV=1	1	5.5	0	120810	109120	162510	97302	103530	118480	99565	91945	115580	113360	99015	81610	139310	115240	136630	117350
Q9QXG9	Q9QXG9	TERF1-interacting nuclear factor 2	Tinf2	sp|Q9QXG9|TINF2_MOUSE TERF1-interacting nuclear factor 2 OS=Mus musculus GN=Tinf2 PE=1 SV=2	1	3.8	0	127300	124140	159680	79231	115160	89581	125090	116130	110090	116220	95118	74489	122440	85750	150860	148760
Q61247	Q61247	Alpha-2-antiplasmin	Serpinf2	sp|Q61247|A2AP_MOUSE Alpha-2-antiplasmin OS=Mus musculus GN=Serpinf2 PE=1 SV=1	1	2.6	0	113180	113420	113430	65158	96389	135340	141360	98023	92919	95681	111090	111690	116980	159430	144850	126060
P27814	P27814	Killer cell lectin-like receptor subfamily B member 1C	Klrb1c	sp|P27814|KLRBC_MOUSE Killer cell lectin-like receptor subfamily B member 1C OS=Mus musculus GN=Klrb1c PE=1 SV=2	1	7.6	0	103920	93317	130670	80980	98132	153790	163580	123940	90066	77322	87417	94471	121750	122570	157740	151950
Q924T3	Q924T3	DNA repair protein XRCC4	Xrcc4	sp|Q924T3|XRCC4_MOUSE DNA repair protein XRCC4 OS=Mus musculus GN=Xrcc4 PE=2 SV=1	2	6.4	0	142270	126680	141730	72433	114180	69586	152270	124320	156300	119670	54512	73400	142130	98796	164390	134770
Q91Y86	Q91Y86	Mitogen-activated protein kinase 8	Mapk8	sp|Q91Y86|MK08_MOUSE Mitogen-activated protein kinase 8 OS=Mus musculus GN=Mapk8 PE=1 SV=1	4	10.9	0	132570	133360	143020	70384	116780	72159	162410	133040	129390	103110	94020	77782	133390	84259	151550	120480
P97797	P97797	Tyrosine-protein phosphatase non-receptor type substrate 1	Sirpa	sp|P97797|SHPS1_MOUSE Tyrosine-protein phosphatase non-receptor type substrate 1 OS=Mus musculus GN=Sirpa PE=1 SV=1	2	6.4	0	69392	59683	126150	92245	92463	210670	180830	120740	82350	60547	100690	120680	121580	186800	158580	145590
Q921J4	Q921J4	Ubiquitin-conjugating enzyme E2 S	Ube2s	sp|Q921J4|UBE2S_MOUSE Ubiquitin-conjugating enzyme E2 S OS=Mus musculus GN=Ube2s PE=2 SV=1	2	9.4	0	122060	112130	148580	86487	97230	116420	155020	111490	110790	99915	82992	72118	124820	105540	157830	140780
Q91WL6	Q91WL6	Sorting nexin-11	Snx11	sp|Q91WL6|SNX11_MOUSE Sorting nexin-11 OS=Mus musculus GN=Snx11 PE=1 SV=1	2	10	0	114360	115220	151830	85654	125930	94745	138640	117680	129000	99739	85036	68292	135240	97386	146130	140990
Q9QY66	Q9QY66	Zinc finger HIT domain-containing protein 2	Znhit2	sp|Q9QY66|ZNHI2_MOUSE Zinc finger HIT domain-containing protein 2 OS=Mus musculus GN=Znhit2 PE=2 SV=2	2	10.3	0	125910	103710	150170	81965	112870	90317	150670	118080	121060	105550	96841	76255	123150	108800	136690	139210
Q9D8Z1	Q9D8Z1	Activating signal cointegrator 1 complex subunit 1	Ascc1	sp|Q9D8Z1|ASCC1_MOUSE Activating signal cointegrator 1 complex subunit 1 OS=Mus musculus GN=Ascc1 PE=2 SV=1	1	2.5	0	167620	122860	148810	74301	117970	85264	146970	144030	106430	113160	78942	50596	150590	89099	145430	156390
A0A0A6YVS4	A0A0A6YVS4		Ighv5-9-1	tr|A0A0A6YVS4|A0A0A6YVS4_MOUSE Protein Ighv5-9-1 (Fragment) OS=Mus musculus GN=Ighv5-9-1 PE=4 SV=1	1	7.9	0	70097	99751	165460	157170	64398	108400	155980	106350	94869	108030	134000	142650	67822	117350	158570	137430
Q8VCZ3	Q8VCZ3	THAP domain-containing protein 7	Thap7	sp|Q8VCZ3|THAP7_MOUSE THAP domain-containing protein 7 OS=Mus musculus GN=Thap7 PE=2 SV=1	3	18.8	0	132080	134840	145590	66069	125090	90923	146750	106360	124180	105390	107620	78668	129650	94188	140860	125370
Q69Z61	Q69Z61	PWWP domain-containing protein 2A	Pwwp2a	sp|Q69Z61|PWP2A_MOUSE PWWP domain-containing protein 2A OS=Mus musculus GN=Pwwp2a PE=2 SV=2	2	2.6	0	126730	129840	148680	75930	125280	71301	147610	111530	127730	111640	89527	69791	133490	105410	137830	153980
P56873	P56873	Sjoegren syndrome/scleroderma autoantigen 1 homolog	Sssca1	sp|P56873|SSA27_MOUSE Sjoegren syndrome/scleroderma autoantigen 1 homolog OS=Mus musculus GN=Sssca1 PE=2 SV=1	4	31.7	0	109490	115820	142270	89200	119060	122440	123890	99788	114690	114420	94320	76985	133670	109560	138500	129670
P13541	P13541	Myosin-3	Myh3	sp|P13541|MYH3_MOUSE Myosin-3 OS=Mus musculus GN=Myh3 PE=2 SV=2	29	13.9	0	69656	63032	82665	252290	69155	76873	337380	224090	53710	47129	54328	269520	100670	284220	161440	118930
P70453	P70453	High affinity cAMP-specific 3,5-cyclic phosphodiesterase 7A	Pde7a	sp|P70453|PDE7A_MOUSE High affinity cAMP-specific 3,5-cyclic phosphodiesterase 7A OS=Mus musculus GN=Pde7a PE=2 SV=2	2	8.1	0	121280	125780	165500	71591	114510	69749	154070	125670	161740	102240	86435	66945	135230	95454	142440	154500
Q8C2P3	Q8C2P3	tRNA-dihydrouridine(16/17) synthase [NAD(P)(+)]-like	Dus1l	sp|Q8C2P3|DUS1L_MOUSE tRNA-dihydrouridine(16/17) synthase [NAD(P)(+)]-like OS=Mus musculus GN=Dus1l PE=2 SV=1	4	18.9	0	122090	106050	132370	72237	102030	81298	129970	133310	115700	121350	92573	77915	145080	171640	139500	123270
Q8BX13	Q8BX13	E3 ubiquitin-protein ligase E3D	Ube3d	sp|Q8BX13|UBE3D_MOUSE E3 ubiquitin-protein ligase E3D OS=Mus musculus GN=Ube3d PE=2 SV=1	2	7.9	0	158090	132860	140710	57096	99621	75701	160590	118770	138730	142510	88678	68648	145270	80053	159260	144990
Q9Z207	Q9Z207	Protein diaphanous homolog 3	Diaph3	sp|Q9Z207|DIAP3_MOUSE Protein diaphanous homolog 3 OS=Mus musculus GN=Diaph3 PE=1 SV=1	5	6.1	0	109170	98724	169810	94479	98413	130030	126660	89679	111770	81458	102960	104620	124470	159440	142910	113880
Q9CQX4	Q9CQX4	PCNA-associated factor	Paf	sp|Q9CQX4|PAF15_MOUSE PCNA-associated factor OS=Mus musculus GN=Paf PE=1 SV=1	2	26.4	0	110110	103240	133500	86519	104840	141020	112940	102810	104810	85970	91954	109340	124660	164890	139880	136610
A0A075B623;A0A075B603;A0A075B6B5;A0A075B621	A0A075B623;A0A075B603;A0A075B6B5;A0A075B621		Trav6n-6;Trav6-6;Trav6-5;Trav6n-5	tr|A0A075B623|A0A075B623_MOUSE Protein Trav6n-6 OS=Mus musculus GN=Trav6n-6 PE=4 SV=1;tr|A0A075B603|A0A075B603_MOUSE Protein Trav6-6 OS=Mus musculus GN=Trav6-6 PE=4 SV=1;tr|A0A075B6B5|A0A075B6B5_MOUSE Protein Trav6-5 (Fragment) OS=Mus musculus GN=Trav6-5 P	2	20	0	134270	138060	152420	71974	112740	89909	137420	121100	122400	93510	99481	90817	132490	91734	138980	135500
P33267	P33267	Cytochrome P450 2F2	Cyp2f2	sp|P33267|CP2F2_MOUSE Cytochrome P450 2F2 OS=Mus musculus GN=Cyp2f2 PE=2 SV=1	1	2	0	103730	109910	278270	74704	85801	99214	117720	109290	98259	104060	256620	68217	105980	103800	132110	121200
Q9R0C0	Q9R0C0	Biogenesis of lysosome-related organelles complex 1 subunit 6	Bloc1s6	sp|Q9R0C0|BL1S6_MOUSE Biogenesis of lysosome-related organelles complex 1 subunit 6 OS=Mus musculus GN=Bloc1s6 PE=1 SV=1	1	4.7	0	130000	127210	151310	83169	120070	93330	115400	110850	106330	111030	102350	72080	122250	157200	135390	126960
Q91X72	Q91X72	Hemopexin	Hpx	sp|Q91X72|HEMO_MOUSE Hemopexin OS=Mus musculus GN=Hpx PE=1 SV=2	3	12	0	137900	129510	139650	80320	114460	99675	140840	123750	111940	103400	84662	77281	118280	115860	161730	136130
Q7TPC1	Q7TPC1	Corneodesmosin	Cdsn	sp|Q7TPC1|CDSN_MOUSE Corneodesmosin OS=Mus musculus GN=Cdsn PE=2 SV=2	1	1.6	0	89645	130250	130080	112540	105550	141920	114750	91503	153150	122800	97203	88292	109010	108100	152010	119750
Q3TJ91	Q3TJ91	Lethal(2) giant larvae protein homolog 2	Llgl2	sp|Q3TJ91|L2GL2_MOUSE Lethal(2) giant larvae protein homolog 2 OS=Mus musculus GN=Llgl2 PE=1 SV=2	2	2.6	0	119920	131330	133600	86320	100270	92936	147320	102400	110890	111400	86108	94553	124010	141050	161910	130110
P63147	P63147	Ubiquitin-conjugating enzyme E2 B	Ube2b	sp|P63147|UBE2B_MOUSE Ubiquitin-conjugating enzyme E2 B OS=Mus musculus GN=Ube2b PE=1 SV=1	1	11.2	0	149540	154150	132850	56897	115330	68497	162720	121970	128430	136650	76900	55960	137280	144390	164010	145250
P43300	P43300	Early growth response protein 3	Egr3	sp|P43300|EGR3_MOUSE Early growth response protein 3 OS=Mus musculus GN=Egr3 PE=2 SV=2	2	6.5	0	150440	131340	160690	68127	127730	54433	177770	129100	140170	123770	80173	73972	153280	77288	154410	150080
Q8R4L0	Q8R4L0	Src-like-adapter 2	Sla2	sp|Q8R4L0|SLAP2_MOUSE Src-like-adapter 2 OS=Mus musculus GN=Sla2 PE=1 SV=3	2	14.3	0	122080	125690	151710	97151	112610	109420	137000	130940	119550	96806	86963	88661	118090	115870	139030	116650
O08832	O08832	Polypeptide N-acetylgalactosaminyltransferase 4	Galnt4	sp|O08832|GALT4_MOUSE Polypeptide N-acetylgalactosaminyltransferase 4 OS=Mus musculus GN=Galnt4 PE=2 SV=1	2	3.6	0	106410	102320	167520	93966	113930	98605	140380	116240	111780	100830	130450	78609	114690	100060	167710	145380
E9Q0S6	E9Q0S6		Tns1	tr|E9Q0S6|E9Q0S6_MOUSE Protein Tns1 OS=Mus musculus GN=Tns1 PE=1 SV=1	3	3.2	0	141200	117890	128810	83039	97813	122250	151840	115420	106940	105560	84244	86381	120150	128820	146900	146980
Q6PHU5	Q6PHU5	Sortilin	Sort1	sp|Q6PHU5|SORT_MOUSE Sortilin OS=Mus musculus GN=Sort1 PE=1 SV=1	2	3	0	112630	99910	141950	119800	108230	141600	137430	107370	86503	88114	107650	99517	119490	150900	135960	125840
P49222	P49222	Erythrocyte membrane protein band 4.2	Epb42	sp|P49222|EPB42_MOUSE Erythrocyte membrane protein band 4.2 OS=Mus musculus GN=Epb42 PE=2 SV=3	3	5.5	0	91286	80817	131480	98576	80365	236200	148770	113990	86983	67275	100150	108280	102240	225440	173800	144890
P05627	P05627	Transcription factor AP-1	Jun	sp|P05627|JUN_MOUSE Transcription factor AP-1 OS=Mus musculus GN=Jun PE=1 SV=3	4	12.9	0	135670	139260	172890	73888	122580	77633	155570	135700	104880	117390	94599	78131	133890	84092	157110	146100
O88792	O88792	Junctional adhesion molecule A	F11r	sp|O88792|JAM1_MOUSE Junctional adhesion molecule A OS=Mus musculus GN=F11r PE=1 SV=2	1	3.7	0	95248	89954	156680	120380	99982	156530	131160	108560	101910	74940	110500	122710	115410	124500	148540	143960
Q6NZI9	Q6NZI9		Zfp180	tr|Q6NZI9|Q6NZI9_MOUSE Protein Zfp180 OS=Mus musculus GN=Zfp180 PE=2 SV=1	3	4.7	0	148560	118270	156230	84514	102400	71607	157300	125420	133820	124860	95990	75632	142290	87228	154040	147760
Q6PFH3	Q6PFH3	DDB1- and CUL4-associated factor 15	Dcaf15	sp|Q6PFH3|DCA15_MOUSE DDB1- and CUL4-associated factor 15 OS=Mus musculus GN=Dcaf15 PE=2 SV=1	3	7.8	0	168270	142200	153380	61741	118170	71123	160990	142320	155600	116760	86386	53417	122190	88479	178090	164460
Q99N17;Q3V1F1;G3UW78	Q99N17;Q3V1F1;G3UW78		Cyp4f16;Cyp4f37;Cyp4f17	tr|Q99N17|Q99N17_MOUSE Cytochrome P450 CYP4F16 OS=Mus musculus GN=Cyp4f16 PE=2 SV=1;tr|Q3V1F1|Q3V1F1_MOUSE MCG125471 OS=Mus musculus GN=Cyp4f37 PE=2 SV=1;tr|G3UW78|G3UW78_MOUSE MCG14247 OS=Mus musculus GN=Cyp4f17 PE=3 SV=1	2	5	0	96311	100470	152680	123150	92864	159630	119960	115470	107570	90763	105460	133320	115070	118110	133950	124080
P56546	P56546	C-terminal-binding protein 2	Ctbp2	sp|P56546|CTBP2_MOUSE C-terminal-binding protein 2 OS=Mus musculus GN=Ctbp2 PE=1 SV=2	7	18	0	101370	103410	141080	100890	108200	150660	146940	115850	94499	74031	95737	109250	116430	156080	163880	130830
Q6P2L7	Q6P2L7	Protein CASC4	Casc4	sp|Q6P2L7|CASC4_MOUSE Protein CASC4 OS=Mus musculus GN=Casc4 PE=2 SV=1	1	1.8	0	88152	83200	201910	117720	99957	148080	130160	94412	107240	77991	174790	129470	129580	125450	114430	111380
P61216	P61216	Transcription initiation factor TFIID subunit 13	Taf13	sp|P61216|TAF13_MOUSE Transcription initiation factor TFIID subunit 13 OS=Mus musculus GN=Taf13 PE=2 SV=1	2	29	0	163810	128840	161520	63629	106220	82343	172030	114750	101270	127510	75462	68155	158930	108780	177300	169590
P30882	P30882	C-C motif chemokine 5	Ccl5	sp|P30882|CCL5_MOUSE C-C motif chemokine 5 OS=Mus musculus GN=Ccl5 PE=2 SV=2	1	8.8	0	76301	90102	163390	124320	97793	167250	129410	102510	76441	83569	112080	148700	119280	185420	139140	130960
P70265	P70265	6-phosphofructo-2-kinase/fructose-2,6-bisphosphatase 2;6-phosphofructo-2-kinase;Fructose-2,6-bisphosphatase	Pfkfb2	sp|P70265|F262_MOUSE 6-phosphofructo-2-kinase/fructose-2,6-bisphosphatase 2 OS=Mus musculus GN=Pfkfb2 PE=2 SV=2	4	8.7	0	139070	141930	161710	71588	125500	94306	151860	116380	118330	119790	118570	59140	137680	84304	152150	158520
Q9WV76	Q9WV76	AP-4 complex subunit beta-1	Ap4b1	sp|Q9WV76|AP4B1_MOUSE AP-4 complex subunit beta-1 OS=Mus musculus GN=Ap4b1 PE=2 SV=2	5	15	0	131890	142680	156040	70218	98244	105660	146110	121280	127020	109360	95763	76001	124530	115500	179210	135200
Q02384	Q02384	Son of sevenless homolog 2	Sos2	sp|Q02384|SOS2_MOUSE Son of sevenless homolog 2 OS=Mus musculus GN=Sos2 PE=1 SV=2	8	6.5	0	124950	135740	174270	69835	114430	112610	137650	110570	126570	115370	105190	73212	133860	102510	158850	143980
Q9D1L9	Q9D1L9	Ragulator complex protein LAMTOR5	Lamtor5	sp|Q9D1L9|LTOR5_MOUSE Ragulator complex protein LAMTOR5 OS=Mus musculus GN=Lamtor5 PE=2 SV=1	2	48.4	0	131990	126530	125060	83764	141590	90800	165210	145140	124150	90962	96998	76814	143330	101660	152810	146390
Q91ZM2	Q91ZM2	SH2B adapter protein 1	Sh2b1	sp|Q91ZM2|SH2B1_MOUSE SH2B adapter protein 1 OS=Mus musculus GN=Sh2b1 PE=1 SV=2	2	7	0	123700	122100	152980	82331	120310	92075	159290	109500	130830	97324	91926	101830	122830	100980	171770	161890
Q8C3W1	Q8C3W1	Uncharacterized protein C1orf198 homolog		sp|Q8C3W1|CA198_MOUSE Uncharacterized protein C1orf198 homolog OS=Mus musculus PE=2 SV=1	1	2.8	0	158830	136090	140140	72089	96646	103500	160910	115140	137770	120530	81014	76665	129650	110200	175260	147660
Q60654	Q60654	Killer cell lectin-like receptor 7	Klra7	sp|Q60654|KLRA7_MOUSE Killer cell lectin-like receptor 7 OS=Mus musculus GN=Klra7 PE=1 SV=1	1	5.7	0	115750	73411	126350	89312	116410	132420	125220	121650	102330	121660	111720	96794	165810	145460	156490	142630
P0C0A3	P0C0A3	Charged multivesicular body protein 6	Chmp6	sp|P0C0A3|CHMP6_MOUSE Charged multivesicular body protein 6 OS=Mus musculus GN=Chmp6 PE=2 SV=2	1	7	0	144850	130880	164130	83068	142190	83794	180840	111460	126650	131960	106030	66086	137390	82449	160090	126840
Q8BY68	Q8BY68		A630033H20Rik	tr|Q8BY68|Q8BY68_MOUSE Protein A630033H20Rik OS=Mus musculus GN=A630033H20Rik PE=2 SV=1	1	3.7	0	133740	137260	156800	89500	123460	85385	159730	113880	117090	117180	108020	86145	111250	115450	167840	130600
Q99KS2	Q99KS2	Neugrin	Ngrn	sp|Q99KS2|NGRN_MOUSE Neugrin OS=Mus musculus GN=Ngrn PE=2 SV=3	3	13	0	147400	123070	155860	91493	110510	107530	132520	120170	113980	114830	125620	88758	139020	119420	132180	115380
Q9D9M2	Q9D9M2	Ubiquitin carboxyl-terminal hydrolase 12	Usp12	sp|Q9D9M2|UBP12_MOUSE Ubiquitin carboxyl-terminal hydrolase 12 OS=Mus musculus GN=Usp12 PE=2 SV=2	2	7	0	151180	165560	156620	76895	120560	84241	155440	127940	142340	146060	73132	67342	136210	82159	175460	151680
Q3TPJ7	Q3TPJ7	Midnolin	Midn	sp|Q3TPJ7|MIDN_MOUSE Midnolin OS=Mus musculus GN=Midn PE=2 SV=1	1	2.4	0	119990	126950	150800	110330	111300	94726	132320	121850	127450	94216	118390	111040	118610	124160	138330	136830
P61219	P61219	DNA-directed RNA polymerases I, II, and III subunit RPABC2	Polr2f	sp|P61219|RPAB2_MOUSE DNA-directed RNA polymerases I, II, and III subunit RPABC2 OS=Mus musculus GN=Polr2f PE=2 SV=1	1	7.1	0	153690	143090	149230	69732	139860	78583	178220	120300	123340	120910	86356	64994	150890	100400	199860	138810
Q8CCA0	Q8CCA0	DCN1-like protein 4	Dcun1d4	sp|Q8CCA0|DCNL4_MOUSE DCN1-like protein 4 OS=Mus musculus GN=Dcun1d4 PE=2 SV=1	2	6.8	0	183140	148660	145780	63632	131890	87224	158610	141770	146180	137560	93321	60087	146940	77526	164770	137380
Q3U213	Q3U213	Protein SERAC1	Serac1	sp|Q3U213|SRAC1_MOUSE Protein SERAC1 OS=Mus musculus GN=Serac1 PE=2 SV=1	2	3.1	0	140540	126470	171690	95450	123290	85284	127760	116150	132210	117950	97199	90877	121680	106380	159850	149310
Q9JMH7	Q9JMH7	Sialidase-3	Neu3	sp|Q9JMH7|NEUR3_MOUSE Sialidase-3 OS=Mus musculus GN=Neu3 PE=1 SV=1	3	13.9	0	126910	123740	162050	88154	114030	98096	138090	117820	148420	116460	99038	92059	107670	128200	162060	135970
Q62431	Q62431	AT-rich interactive domain-containing protein 3A	Arid3a	sp|Q62431|ARI3A_MOUSE AT-rich interactive domain-containing protein 3A OS=Mus musculus GN=Arid3a PE=1 SV=1	3	8	0	125170	122610	138560	87914	136310	130160	112160	120160	114730	98074	121480	88138	124240	129240	160000	141670
Q9D7J6	Q9D7J6	Deoxyribonuclease-1-like 1	Dnase1l1	sp|Q9D7J6|DNSL1_MOUSE Deoxyribonuclease-1-like 1 OS=Mus musculus GN=Dnase1l1 PE=2 SV=3	2	8.9	0	133610	117850	146960	107920	114990	97146	141550	106270	131040	111640	100680	87582	133220	100360	194640	145410
H3BKQ3	H3BKQ3		Evi5l	tr|H3BKQ3|H3BKQ3_MOUSE Protein Evi5l OS=Mus musculus GN=Evi5l PE=4 SV=1	4	6.5	0	144630	160350	160840	71225	140260	83440	182330	133410	143740	114570	89674	59280	124430	98534	163290	155650
Q99LE3	Q99LE3	LysM and putative peptidoglycan-binding domain-containing protein 3	Lysmd3	sp|Q99LE3|LYSM3_MOUSE LysM and putative peptidoglycan-binding domain-containing protein 3 OS=Mus musculus GN=Lysmd3 PE=2 SV=1	3	13.4	0	142410	142040	148770	89595	119030	107090	137100	122810	117400	95656	107230	91786	133320	129690	144250	130010
Q8CDJ8	Q8CDJ8	Stonin-1	Ston1	sp|Q8CDJ8|STON1_MOUSE Stonin-1 OS=Mus musculus GN=Ston1 PE=2 SV=2	2	4.9	0	179070	123770	128180	96454	105980	83065	145530	142480	131270	150830	73363	68789	174240	103380	155530	149320
P63330	P63330	Serine/threonine-protein phosphatase 2A catalytic subunit alpha isoform	Ppp2ca	sp|P63330|PP2AA_MOUSE Serine/threonine-protein phosphatase 2A catalytic subunit alpha isoform OS=Mus musculus GN=Ppp2ca PE=1 SV=1	15	59.2	0	183400	145900	158760	53259	113250	79395	156530	131320	153030	158380	110960	63743	139080	87381	169780	142610
Q99K51	Q99K51	Plastin-3	Pls3	sp|Q99K51|PLST_MOUSE Plastin-3 OS=Mus musculus GN=Pls3 PE=1 SV=3	11	21.9	0	189220	139900	149210	56609	123230	87421	194960	145570	132800	135770	73187	64267	115950	89975	197240	180710
Q99LW0	Q99LW0	Ankyrin repeat domain-containing protein 10	Ankrd10	sp|Q99LW0|ANR10_MOUSE Ankyrin repeat domain-containing protein 10 OS=Mus musculus GN=Ankrd10 PE=2 SV=2	3	16.9	0	139360	123370	166150	89495	123980	107270	156930	102960	118300	122610	97110	83909	139170	100280	158400	155040
Q3TJB1	Q3TJB1		Zmym1	tr|Q3TJB1|Q3TJB1_MOUSE Protein Zmym1 OS=Mus musculus GN=Zmym1 PE=2 SV=1	2	4	0	115080	110520	141470	79564	117330	125400	168720	129500	94701	97562	91610	92616	169020	128490	176500	161840
Q9D1F9	Q9D1F9		Slc37a4	tr|Q9D1F9|Q9D1F9_MOUSE Protein Slc37a4 OS=Mus musculus GN=Slc37a4 PE=2 SV=1	2	6.1	0	163740	134400	144920	101010	117040	106520	152300	116980	112210	119120	97655	98304	137940	105780	124740	135820
Q8BTE5	Q8BTE5	Protein CEBPZOS	Cebpzos	sp|Q8BTE5|CEBOS_MOUSE Protein CEBPZOS OS=Mus musculus GN=Cebpzos PE=3 SV=2	1	13.8	0	138110	110200	156110	105650	110590	126420	133820	118010	110670	110330	115990	119980	117150	113170	140060	132180
Q9CPW9	Q9CPW9	Methionine aminopeptidase 1D, mitochondrial	Metap1d	sp|Q9CPW9|MAP12_MOUSE Methionine aminopeptidase 1D, mitochondrial OS=Mus musculus GN=Metap1d PE=2 SV=1	2	6.9	0	141320	110500	169760	113380	113550	94704	142440	92905	114930	103800	128130	117040	139950	109100	141930	139600
Q9D7Y9	Q9D7Y9	Protein SLX4IP	Slx4ip	sp|Q9D7Y9|SLX4I_MOUSE Protein SLX4IP OS=Mus musculus GN=Slx4ip PE=2 SV=1	3	7.7	0	144170	136020	152840	82020	119430	92283	143930	117320	137210	122160	94884	86500	143060	108350	166510	143460
Q8BJ56	Q8BJ56	Patatin-like phospholipase domain-containing protein 2	Pnpla2	sp|Q8BJ56|PLPL2_MOUSE Patatin-like phospholipase domain-containing protein 2 OS=Mus musculus GN=Pnpla2 PE=1 SV=1	2	6	0	142560	140970	170460	84876	108850	96355	164380	109450	130100	131860	86837	74868	142210	127990	153710	137910
O35711	O35711	Liprin-beta-2	Ppfibp2	sp|O35711|LIPB2_MOUSE Liprin-beta-2 OS=Mus musculus GN=Ppfibp2 PE=1 SV=3	2	2.9	0	117130	120350	147100	105470	113230	137560	157350	106860	118200	103290	91030	89589	132050	143670	166990	130770
Q80YR2	Q80YR2	Protein FAM160B2	Fam160b2	sp|Q80YR2|F16B2_MOUSE Protein FAM160B2 OS=Mus musculus GN=Fam160b2 PE=2 SV=2	4	6.5	0	154960	147710	155370	86180	100910	98779	157660	125050	131350	120120	103750	67691	122520	91243	212940	149070
Q9Z2F2	Q9Z2F2	2-5-oligoadenylate synthase-like protein 2	Oasl2	sp|Q9Z2F2|OASL2_MOUSE 2-5-oligoadenylate synthase-like protein 2 OS=Mus musculus GN=Oasl2 PE=1 SV=2	4	13.2	0	162730	141880	167830	83977	89307	111920	138060	115620	160910	110950	123700	103630	109960	88603	140280	148590
Q8BGT0	Q8BGT0	Osteopetrosis-associated transmembrane protein 1	Ostm1	sp|Q8BGT0|OSTM1_MOUSE Osteopetrosis-associated transmembrane protein 1 OS=Mus musculus GN=Ostm1 PE=1 SV=1	1	3.8	0	148270	154300	149850	91315	127010	91231	168720	119520	133550	109040	98049	81651	149110	92061	151970	137250
Q6NV66	Q6NV66		Zfp646	tr|Q6NV66|Q6NV66_MOUSE Protein Zfp646 OS=Mus musculus GN=Zfp646 PE=2 SV=1	5	5.2	0	138590	123070	157600	89207	124360	89796	144390	126710	129520	129780	105720	100190	142750	100060	139440	140830
Q9QUT0	Q9QUT0	Ammonium transporter Rh type A	Rhag	sp|Q9QUT0|RHAG_MOUSE Ammonium transporter Rh type A OS=Mus musculus GN=Rhag PE=2 SV=1	2	6.6	0	143910	128210	150710	76116	94498	123010	148640	112580	131340	92141	143940	105420	117460	131910	152930	138340
A2AJQ3	A2AJQ3	Probable C-mannosyltransferase DPY19L4	Dpy19l4	sp|A2AJQ3|D19L4_MOUSE Probable C-mannosyltransferase DPY19L4 OS=Mus musculus GN=Dpy19l4 PE=2 SV=1	2	5.3	0	109640	131740	167310	122310	116530	106410	136550	116330	110420	118640	113890	85907	143810	116070	148070	134860
P54254	P54254	Ataxin-1	Atxn1	sp|P54254|ATX1_MOUSE Ataxin-1 OS=Mus musculus GN=Atxn1 PE=1 SV=2	4	8.1	0	128220	122490	128450	68874	131850	116540	138910	135850	125800	101910	93772	81755	126670	112680	234260	195610
Q9Z2D7	Q9Z2D7	Methyl-CpG-binding domain protein 4	Mbd4	sp|Q9Z2D7|MBD4_MOUSE Methyl-CpG-binding domain protein 4 OS=Mus musculus GN=Mbd4 PE=1 SV=1	3	12.3	0	140380	133130	146960	97038	141950	117540	133890	121830	130960	102660	117850	82318	138090	108740	141760	132100
Q5DTH5	Q5DTH5	Teashirt homolog 1	Tshz1	sp|Q5DTH5|TSH1_MOUSE Teashirt homolog 1 OS=Mus musculus GN=Tshz1 PE=1 SV=2	2	2.4	0	159530	152500	171590	59688	132710	87967	154080	131130	133600	149130	81209	64376	149130	104600	178590	156540
P09041	P09041	Phosphoglycerate kinase 2	Pgk2	sp|P09041|PGK2_MOUSE Phosphoglycerate kinase 2 OS=Mus musculus GN=Pgk2 PE=1 SV=4	5	13.7	0	99468	106310	159090	123660	127520	163210	103350	91846	122850	129210	159170	100690	126380	129810	136710	116490
Q8VD26	Q8VD26	Transmembrane protein 143	Tmem143	sp|Q8VD26|TM143_MOUSE Transmembrane protein 143 OS=Mus musculus GN=Tmem143 PE=2 SV=1	1	5.5	0	126380	108070	175560	135210	104890	132970	127830	113280	108270	95344	123200	133470	123470	126710	116600	135810
P41272	P41272	CD27 antigen	Cd27	sp|P41272|CD27_MOUSE CD27 antigen OS=Mus musculus GN=Cd27 PE=2 SV=1	1	8.8	0	175200	162790	188120	68708	115370	63410	225360	135660	162040	141560	94582	67769	131110	65382	183440	145470
Q9JJA2	Q9JJA2	Conserved oligomeric Golgi complex subunit 8	Cog8	sp|Q9JJA2|COG8_MOUSE Conserved oligomeric Golgi complex subunit 8 OS=Mus musculus GN=Cog8 PE=2 SV=3	4	10	0	145400	133240	160090	60260	142880	99965	155160	135070	141470	116470	92417	67828	149560	113240	184430	155850
Q14AI0	Q14AI0	Sister chromatid cohesion protein DCC1	DSCC1	sp|Q14AI0|DCC1_MOUSE Sister chromatid cohesion protein DCC1 OS=Mus musculus GN=DSCC1 PE=2 SV=1	3	9.8	0	138870	118850	182540	103600	100030	106500	141230	118220	126910	105200	98711	110630	131110	134380	144050	139390
Q6P6M7	Q6P6M7	O-phosphoseryl-tRNA(Sec) selenium transferase	Sepsecs	sp|Q6P6M7|SPCS_MOUSE O-phosphoseryl-tRNA(Sec) selenium transferase OS=Mus musculus GN=Sepsecs PE=1 SV=2	2	3.4	0	134520	123310	155420	88224	136230	98527	154740	125700	121130	111120	109910	85819	135600	103410	172570	157800
Q8CB65	Q8CB65	Transmembrane protein 194B	Tmem194b	sp|Q8CB65|T194B_MOUSE Transmembrane protein 194B OS=Mus musculus GN=Tmem194b PE=2 SV=3	1	3.8	0	144260	124050	167920	103560	95625	111300	147950	123500	107830	95201	112930	116830	126450	126140	153980	146230
D3YZG8	D3YZG8	Probable bifunctional methylenetetrahydrofolate dehydrogenase/cyclohydrolase 2;NAD-dependent methylenetetrahydrofolate dehydrogenase;Methenyltetrahydrofolate cyclohydrolase	Mthfd2l	sp|D3YZG8|MTD2L_MOUSE Probable bifunctional methylenetetrahydrofolate dehydrogenase/cyclohydrolase 2 OS=Mus musculus GN=Mthfd2l PE=3 SV=1	4	14.5	0	142240	136360	164150	93095	124090	115190	141990	107510	108570	100200	103860	97766	142200	119930	168740	147750
Q8R3J4	Q8R3J4	Transcription termination factor 3, mitochondrial	Mterf3	sp|Q8R3J4|MTEF3_MOUSE Transcription termination factor 3, mitochondrial OS=Mus musculus GN=Mterf3 PE=2 SV=1	3	9.5	0	132320	118870	168690	116300	109570	121680	149760	117370	127840	107700	117910	114300	145930	120290	121730	108370
A6H687	A6H687	SAC3 domain-containing protein 1	Sac3d1	sp|A6H687|SAC31_MOUSE SAC3 domain-containing protein 1 OS=Mus musculus GN=Sac3d1 PE=1 SV=1	1	2.8	0	184530	132300	178840	80710	143000	68672	149940	126660	128120	145760	94595	64689	159370	104770	160950	157410
A0A0A6YXN4	A0A0A6YXN4		Ighv1-18	tr|A0A0A6YXN4|A0A0A6YXN4_MOUSE Protein Ighv1-18 (Fragment) OS=Mus musculus GN=Ighv1-18 PE=4 SV=1	2	23.1	0	50888	70260	159910	88911	120840	217100	176970	157640	66720	84422	147030	117590	143410	208630	180000	163860
Q32M00	Q32M00	cAMP-responsive element-binding protein-like 2	Crebl2	sp|Q32M00|CRBL2_MOUSE cAMP-responsive element-binding protein-like 2 OS=Mus musculus GN=Crebl2 PE=1 SV=1	1	8.1	0	144470	147160	156220	101520	137660	113040	139950	124380	129970	107830	102930	90792	140030	115780	130990	128010
Q3U6U5	Q3U6U5	Putative GTP-binding protein 6	Gtpbp6	sp|Q3U6U5|GTPB6_MOUSE Putative GTP-binding protein 6 OS=Mus musculus GN=Gtpbp6 PE=2 SV=1	2	8.9	0	149230	117410	143710	102790	118730	108390	147240	106180	112340	106380	123590	112030	139960	134680	157490	130630
Q7TSH2	Q7TSH2	Phosphorylase b kinase regulatory subunit beta	Phkb	sp|Q7TSH2|KPBB_MOUSE Phosphorylase b kinase regulatory subunit beta OS=Mus musculus GN=Phkb PE=1 SV=1	2	2.7	0	141410	135790	164660	87202	126710	105800	152820	117280	133860	120360	89307	86797	139800	109710	168550	159510
P11157	P11157	Ribonucleoside-diphosphate reductase subunit M2	Rrm2	sp|P11157|RIR2_MOUSE Ribonucleoside-diphosphate reductase subunit M2 OS=Mus musculus GN=Rrm2 PE=1 SV=1	3	9.5	0	111530	99979	149810	86391	105370	189060	185820	116210	103910	83593	108910	110390	109490	195390	166400	148640
Q5RKS2	Q5RKS2	Small integral membrane protein 7	Smim7	sp|Q5RKS2|SMIM7_MOUSE Small integral membrane protein 7 OS=Mus musculus GN=Smim7 PE=3 SV=1	1	13.3	0	144460	116320	165330	129950	130100	149990	111320	102970	120930	170740	125630	108350	130940	101800	137650	82831
Q9CX48	Q9CX48	Zinc finger CCHC domain-containing protein 10	Zcchc10	sp|Q9CX48|ZCH10_MOUSE Zinc finger CCHC domain-containing protein 10 OS=Mus musculus GN=Zcchc10 PE=2 SV=1	2	14	0	137720	142340	150980	81452	126640	94017	162120	120200	137150	109480	122370	108470	135100	98809	165720	143250
Q80UN9	Q80UN9	tRNA dimethylallyltransferase, mitochondrial	Trit1	sp|Q80UN9|MOD5_MOUSE tRNA dimethylallyltransferase, mitochondrial OS=Mus musculus GN=Trit1 PE=2 SV=2	3	9.2	0	156220	146310	198430	90028	109500	103450	145910	103380	128480	119840	116330	109550	110680	113920	153010	134150
Q3UTB2	Q3UTB2		A630001G21Rik	tr|Q3UTB2|Q3UTB2_MOUSE Protein A630001G21Rik OS=Mus musculus GN=A630001G21Rik PE=2 SV=1	1	4.4	0	158920	124350	152930	85140	118680	112120	140900	131660	168800	140670	103150	88059	125270	99798	139990	148480
Q99KU6	Q99KU6	Bombesin receptor-activated protein C6orf89 homolog		sp|Q99KU6|CF089_MOUSE Bombesin receptor-activated protein C6orf89 homolog OS=Mus musculus PE=2 SV=2	3	15.2	0	101080	102510	190360	131440	139100	107120	148050	119660	95659	89235	130540	154190	124610	121080	155270	129440
Q9QYP6	Q9QYP6	5-azacytidine-induced protein 2	Azi2	sp|Q9QYP6|AZI2_MOUSE 5-azacytidine-induced protein 2 OS=Mus musculus GN=Azi2 PE=1 SV=1	2	5.2	0	174590	137960	159000	52604	127190	94313	166050	128620	144000	131640	100350	77856	157190	102860	185480	157480
Q8R0S2;Q5DU25	Q8R0S2	IQ motif and SEC7 domain-containing protein 1	Iqsec1	sp|Q8R0S2|IQEC1_MOUSE IQ motif and SEC7 domain-containing protein 1 OS=Mus musculus GN=Iqsec1 PE=1 SV=2	6	9.6	0	136920	117560	158510	104790	116750	121130	143810	129980	134550	107890	99063	92795	137330	121320	157190	148090
Q6P3B9	Q6P3B9	Putative ribosome-binding factor A, mitochondrial	Rbfa	sp|Q6P3B9|RBFA_MOUSE Putative ribosome-binding factor A, mitochondrial OS=Mus musculus GN=Rbfa PE=2 SV=1	1	3.1	0	135730	128940	166530	108190	96979	123810	130880	115750	119280	121390	99410	121340	133680	149340	139970	131580
Q3U288	Q3U288	Zinc finger protein 710	Znf710	sp|Q3U288|ZN710_MOUSE Zinc finger protein 710 OS=Mus musculus GN=Znf710 PE=2 SV=1	2	4.2	0	115570	123970	171440	119600	109300	124630	129150	114980	114200	98181	127860	101390	153130	154280	134310	136340
A6H5Y1	A6H5Y1	M-phase phosphoprotein 9	Mphosph9	sp|A6H5Y1|MPP9_MOUSE M-phase phosphoprotein 9 OS=Mus musculus GN=Mphosph9 PE=2 SV=1	1	1.2	0	163060	139520	179080	91272	114370	87246	156140	136520	118500	147730	96156	101050	119470	109930	158120	143380
Q3TD49	Q3TD49	Signal peptide peptidase-like 2B	Sppl2b	sp|Q3TD49|SPP2B_MOUSE Signal peptide peptidase-like 2B OS=Mus musculus GN=Sppl2b PE=2 SV=2	1	2.8	0	99731	103950	169640	110410	130440	180350	112300	102800	124680	114740	129880	121600	145400	122620	133770	142110
P04945	P04945	Ig kappa chain V-VI region NQ2-6.1		sp|P04945|KV6AB_MOUSE Ig kappa chain V-VI region NQ2-6.1 OS=Mus musculus PE=2 SV=1	1	14.8	0	88168	70538	105050	60094	176580	206850	138160	125550	74326	72048	118140	72610	419340	184220	220090	208730
Q60772	Q60772	Cyclin-dependent kinase 4 inhibitor C	Cdkn2c	sp|Q60772|CDN2C_MOUSE Cyclin-dependent kinase 4 inhibitor C OS=Mus musculus GN=Cdkn2c PE=2 SV=1	3	33.3	0	155960	139680	177810	79611	126860	91177	174810	136490	137460	133900	104940	81035	134320	105130	147110	147300
Q91YN0	Q91YN0	Protein C12orf4 homolog	D6Wsu163e	sp|Q91YN0|CL004_MOUSE Protein C12orf4 homolog OS=Mus musculus GN=D6Wsu163e PE=2 SV=1	4	10.1	0	175140	157600	169830	58954	117220	90730	169210	132150	130100	148880	92224	70790	166710	110970	178680	151240
P58681	P58681	Toll-like receptor 7	Tlr7	sp|P58681|TLR7_MOUSE Toll-like receptor 7 OS=Mus musculus GN=Tlr7 PE=1 SV=1	5	8.4	0	97676	76551	154240	125320	110270	197690	155160	121640	84989	90095	104820	137940	149590	178140	163490	146390
Q9WU79	Q9WU79	Proline dehydrogenase 1, mitochondrial	Prodh	sp|Q9WU79|PROD_MOUSE Proline dehydrogenase 1, mitochondrial OS=Mus musculus GN=Prodh PE=1 SV=2	7	17	0	129770	118070	148340	147680	109320	165410	150330	104250	108530	86898	103030	144020	129990	146910	132840	124700
Q80UY2	Q80UY2	E3 ubiquitin-protein ligase KCMF1	Kcmf1	sp|Q80UY2|KCMF1_MOUSE E3 ubiquitin-protein ligase KCMF1 OS=Mus musculus GN=Kcmf1 PE=2 SV=1	2	9.4	0	140700	143200	150480	73528	124980	101220	159390	135490	145050	116850	104070	82196	143420	106900	195400	159910
Q8BH51	Q8BH51	Cytochrome c oxidase assembly protein COX14	Cox14	sp|Q8BH51|COX14_MOUSE Cytochrome c oxidase assembly protein COX14 OS=Mus musculus GN=Cox14 PE=2 SV=1	2	54.4	0	124280	117180	171160	116460	120510	141180	140080	134160	143010	92345	109670	123350	124950	125640	139050	117620
P21552	P21552	Protein Wnt-2	Wnt2	sp|P21552|WNT2_MOUSE Protein Wnt-2 OS=Mus musculus GN=Wnt2 PE=2 SV=2	1	2.2	0	126590	134300	178720	83707	121500	98962	140380	119250	118300	132650	109150	120430	147110	117840	160040	146280
Q8R070	Q8R070		Slc37a1	tr|Q8R070|Q8R070_MOUSE Protein Slc37a1 OS=Mus musculus GN=Slc37a1 PE=2 SV=1	2	7	0	140340	128620	190470	103140	107010	124010	135380	123910	135710	122660	120530	80622	131010	107160	165640	148280
Q62053	Q62053	Prostaglandin E2 receptor EP2 subtype	Ptger2	sp|Q62053|PE2R2_MOUSE Prostaglandin E2 receptor EP2 subtype OS=Mus musculus GN=Ptger2 PE=2 SV=1	1	4.7	0	147560	138910	225350	83786	111610	53922	185200	141130	141320	138350	125260	92230	136090	85161	175510	158930
Q8CH77	Q8CH77	Neuron navigator 1	Nav1	sp|Q8CH77|NAV1_MOUSE Neuron navigator 1 OS=Mus musculus GN=Nav1 PE=1 SV=2	4	3.5	0	143000	117380	170140	83715	118610	109580	161300	134270	146510	128010	104720	91414	128290	114440	160670	158570
O35071	O35071	Kinesin-like protein KIF1C	Kif1c	sp|O35071|KIF1C_MOUSE Kinesin-like protein KIF1C OS=Mus musculus GN=Kif1c PE=2 SV=2	5	6.7	0	138740	130730	160240	108880	94429	128830	137510	118410	119180	109710	111700	106720	134200	165610	138300	151470
Q9ES57	Q9ES57	Cell surface glycoprotein CD200 receptor 1	Cd200r1	sp|Q9ES57|MO2R1_MOUSE Cell surface glycoprotein CD200 receptor 1 OS=Mus musculus GN=Cd200r1 PE=1 SV=1	3	15	0	126660	123670	196280	116160	130570	120480	149840	98340	142130	115540	121640	99360	123810	117650	146700	132160
P60487	P60487	Pyridoxal phosphate phosphatase	Pdxp	sp|P60487|PLPP_MOUSE Pyridoxal phosphate phosphatase OS=Mus musculus GN=Pdxp PE=1 SV=1	4	26.7	0	182190	160160	168740	75048	126590	100360	171760	111830	152030	132970	94151	78942	145770	98682	177080	135030
Q9CQ00	Q9CQ00	Transmembrane protein 261	Tmem261	sp|Q9CQ00|TM261_MOUSE Transmembrane protein 261 OS=Mus musculus GN=Tmem261 PE=2 SV=1	1	12.6	0	107010	101900	172970	113650	101080	174890	141480	116500	98677	85276	122250	106270	126200	192790	176140	162490
Q9CS74	Q9CS74	Protein SGT1 homolog	Ecd	sp|Q9CS74|SGT1_MOUSE Protein SGT1 homolog OS=Mus musculus GN=Ecd PE=1 SV=2	4	10	0	154960	147970	165300	75308	138600	90857	179270	149000	158610	93280	91459	72331	166560	108830	176030	158830
Q8VCV1	Q8VCV1	Alpha/beta hydrolase domain-containing protein 17C	Abhd17c	sp|Q8VCV1|AB17C_MOUSE Alpha/beta hydrolase domain-containing protein 17C OS=Mus musculus GN=Abhd17c PE=2 SV=2	1	3.8	0	131380	99424	142380	106100	118420	215270	155700	142700	167190	93091	106280	106960	132880	111140	122410	137370
F2Z3U3	F2Z3U3		Raph1	tr|F2Z3U3|F2Z3U3_MOUSE Protein Raph1 OS=Mus musculus GN=Raph1 PE=1 SV=2	3	2.1	0	154050	149060	171970	81230	125230	100670	165700	133350	133190	131860	101670	68263	139470	107710	184110	168860
Q9D5R2	Q9D5R2	WD repeat-containing protein 20	Wdr20	sp|Q9D5R2|WDR20_MOUSE WD repeat-containing protein 20 OS=Mus musculus GN=Wdr20 PE=2 SV=1	2	4.4	0	173490	145720	162350	72269	144830	89371	176360	139910	138100	128830	83830	70034	164050	100460	182510	171110
B2KF50	B2KF50		Uhrf1bp1	tr|B2KF50|B2KF50_MOUSE Protein Uhrf1bp1 OS=Mus musculus GN=Uhrf1bp1 PE=1 SV=1	3	2.7	0	152670	147530	158790	83173	131530	134400	158950	135210	130630	93580	100340	109830	131460	130320	151560	135690
Q91VY5	Q91VY5	Lysine-specific demethylase 4B	Kdm4b	sp|Q91VY5|KDM4B_MOUSE Lysine-specific demethylase 4B OS=Mus musculus GN=Kdm4b PE=2 SV=1	1	1.2	0	155460	131500	163730	69283	131540	103090	157920	134810	146390	120970	112000	93438	141210	110950	180120	155280
Q8C180	Q8C180	Fibroblast growth factor receptor substrate 2	Frs2	sp|Q8C180|FRS2_MOUSE Fibroblast growth factor receptor substrate 2 OS=Mus musculus GN=Frs2 PE=1 SV=3	1	4.1	0	136330	148230	180650	91813	124890	75687	158330	139770	145640	137220	113790	91995	146760	93413	167470	162880
Q9Z0P7	Q9Z0P7	Suppressor of fused homolog	Sufu	sp|Q9Z0P7|SUFU_MOUSE Suppressor of fused homolog OS=Mus musculus GN=Sufu PE=1 SV=1	4	12	0	155140	168190	180770	90768	111540	104600	170350	112650	171070	136930	99177	89174	128900	91743	174190	141410
Q9JKL4	Q9JKL4	NADH dehydrogenase [ubiquinone] 1 alpha subcomplex assembly factor 3	Ndufaf3	sp|Q9JKL4|NDUF3_MOUSE NADH dehydrogenase [ubiquinone] 1 alpha subcomplex assembly factor 3 OS=Mus musculus GN=Ndufaf3 PE=2 SV=1	4	40.5	0	141710	117780	174170	109740	104190	97208	135950	111320	142520	99181	205270	133410	126710	147340	155500	105790
Q8R3G9	Q8R3G9	Tetraspanin-8	Tspan8	sp|Q8R3G9|TSN8_MOUSE Tetraspanin-8 OS=Mus musculus GN=Tspan8 PE=2 SV=1	1	4.3	0	133750	109470	190570	122640	90929	159310	144520	119150	102400	86508	122170	129430	121420	173160	156370	148940
Q9R111;REV__Q9Z2U0	Q9R111	Guanine deaminase	Gda	sp|Q9R111|GUAD_MOUSE Guanine deaminase OS=Mus musculus GN=Gda PE=1 SV=1	4	11.5	0	121490	111320	126720	103230	96968	173020	174310	158420	136490	98679	99928	104610	129460	174760	163150	154040
B2RXM6	B2RXM6		Ly6g6f	tr|B2RXM6|B2RXM6_MOUSE Ly6g6f protein OS=Mus musculus GN=Ly6g6f PE=2 SV=1	1	6	0	172990	173900	175900	74312	133140	74890	194960	141020	161360	146240	98725	72279	148750	97144	182880	146750
Q8BRB7	Q8BRB7	Histone acetyltransferase KAT6B	Kat6b	sp|Q8BRB7|KAT6B_MOUSE Histone acetyltransferase KAT6B OS=Mus musculus GN=Kat6b PE=1 SV=3	6	3.7	0	155200	140750	186650	107030	113920	114200	156910	131350	118480	119600	106370	113760	156760	117420	154470	126120
Q8BMA3	Q8BMA3	Connector enhancer of kinase suppressor of ras 3	Cnksr3	sp|Q8BMA3|CNKR3_MOUSE Connector enhancer of kinase suppressor of ras 3 OS=Mus musculus GN=Cnksr3 PE=1 SV=1	2	3.6	0	121010	139500	156110	100800	126950	136240	156510	132630	134960	100910	120150	86888	155850	153540	170000	135800
Q99J93	Q99J93	Interferon-induced transmembrane protein 2	Ifitm2	sp|Q99J93|IFM2_MOUSE Interferon-induced transmembrane protein 2 OS=Mus musculus GN=Ifitm2 PE=1 SV=1	2	18.1	0	115520	126950	158970	107650	126730	154080	157920	120610	114220	95503	116780	117930	159460	143140	159840	149800
Q5XJV7	Q5XJV7	SET domain-containing protein 5	Setd5	sp|Q5XJV7|SETD5_MOUSE SET domain-containing protein 5 OS=Mus musculus GN=Setd5 PE=1 SV=2	4	6.4	0	144850	116430	188290	90400	101270	99320	153670	120130	127290	132470	158310	114370	144600	135130	183110	133310
Q9D2V5	Q9D2V5	Protein AAR2 homolog	Aar2	sp|Q9D2V5|AAR2_MOUSE Protein AAR2 homolog OS=Mus musculus GN=Aar2 PE=2 SV=3	4	21.9	0	187440	158090	169150	71679	139790	91372	171800	150190	145650	119150	102040	77847	153150	107360	190480	151860
Q8BW56	Q8BW56	Glycosyltransferase-like domain-containing protein 1	Gtdc1	sp|Q8BW56|GTDC1_MOUSE Glycosyltransferase-like domain-containing protein 1 OS=Mus musculus GN=Gtdc1 PE=2 SV=2	1	2.5	0	174950	144530	183400	84634	137040	99637	171780	127900	130310	125560	102320	79504	161140	95288	179760	179710
Q8BFS9	Q8BFS9	Asparagine synthetase domain-containing protein 1	Asnsd1	sp|Q8BFS9|ASND1_MOUSE Asparagine synthetase domain-containing protein 1 OS=Mus musculus GN=Asnsd1 PE=2 SV=1	3	6.7	0	169400	165980	173830	70439	134870	105200	165180	145880	128650	118780	106630	80968	139780	114470	187940	166570
P32972	P32972	Tumor necrosis factor ligand superfamily member 8	Tnfsf8	sp|P32972|TNFL8_MOUSE Tumor necrosis factor ligand superfamily member 8 OS=Mus musculus GN=Tnfsf8 PE=2 SV=1	2	9.2	0	165170	132020	163000	61830	152520	69421	208390	144200	132570	149420	97775	77938	179280	89265	241420	201190
E9QAB6	E9QAB6		Ptar1	tr|E9QAB6|E9QAB6_MOUSE Protein Ptar1 OS=Mus musculus GN=Ptar1 PE=4 SV=1	4	10.4	0	162090	169300	166020	94689	122620	98210	164150	130040	137720	115640	108090	104560	151850	99388	178840	155810
Q8VDF3	Q8VDF3	Death-associated protein kinase 2	Dapk2	sp|Q8VDF3|DAPK2_MOUSE Death-associated protein kinase 2 OS=Mus musculus GN=Dapk2 PE=1 SV=1	3	9.2	0	128670	98587	150950	134060	104150	134850	155670	129780	129530	96036	107230	149220	128100	153230	184120	160970
Q9D110	Q9D110	5-formyltetrahydrofolate cyclo-ligase	Mthfs	sp|Q9D110|MTHFS_MOUSE 5-formyltetrahydrofolate cyclo-ligase OS=Mus musculus GN=Mthfs PE=2 SV=2	9	58.6	0	166500	130150	162490	102620	127640	97032	149500	143520	130060	128950	115750	97698	136070	116600	179600	164550
Q922Q5	Q922Q5	Adenosine 3-phospho 5-phosphosulfate transporter 2	Slc35b3	sp|Q922Q5|S35B3_MOUSE Adenosine 3-phospho 5-phosphosulfate transporter 2 OS=Mus musculus GN=Slc35b3 PE=2 SV=1	1	2.4	0	168240	146190	208420	103900	116450	80565	177510	146260	142540	119510	99906	91596	159880	104080	172470	150870
P06728	P06728	Apolipoprotein A-IV	Apoa4	sp|P06728|APOA4_MOUSE Apolipoprotein A-IV OS=Mus musculus GN=Apoa4 PE=1 SV=3	2	6.3	0	88739	99170	149100	111630	123790	203050	173830	128520	95901	91575	108150	132520	124330	201250	200930	169120
O08983	O08983	Hermansky-Pudlak syndrome 1 protein homolog	Hps1	sp|O08983|HPS1_MOUSE Hermansky-Pudlak syndrome 1 protein homolog OS=Mus musculus GN=Hps1 PE=2 SV=2	1	2.1	0	173500	123310	175940	96261	126230	123730	150410	132140	117200	147900	108650	99818	148390	110440	180340	142230
Q9CWY3	Q9CWY3	N-lysine methyltransferase SETD6	Setd6	sp|Q9CWY3|SETD6_MOUSE N-lysine methyltransferase SETD6 OS=Mus musculus GN=Setd6 PE=1 SV=1	3	9.9	0	186610	171050	185490	60570	135330	85393	182810	134220	150510	139730	98058	76446	154440	94256	198890	192040
Q8K2C8	Q8K2C8	Glycerol-3-phosphate acyltransferase 4	Agpat6	sp|Q8K2C8|GPAT4_MOUSE Glycerol-3-phosphate acyltransferase 4 OS=Mus musculus GN=Agpat6 PE=2 SV=1	3	8.8	0	149000	135590	179420	108940	106960	123340	147430	128510	135790	132760	128230	118200	121450	116870	167800	139300
Q6KAQ7	Q6KAQ7	ZZ-type zinc finger-containing protein 3	Zzz3	sp|Q6KAQ7|ZZZ3_MOUSE ZZ-type zinc finger-containing protein 3 OS=Mus musculus GN=Zzz3 PE=1 SV=2	4	8.8	0	157570	153110	181860	101710	124510	85356	136620	107710	127800	148260	123250	104690	170850	119860	170440	153080
Q8VCI5	Q8VCI5	Peroxisomal biogenesis factor 19	Pex19	sp|Q8VCI5|PEX19_MOUSE Peroxisomal biogenesis factor 19 OS=Mus musculus GN=Pex19 PE=1 SV=1	3	10.7	0	137610	120040	160440	103720	127770	126520	150210	132570	128330	94381	122420	120680	160920	136670	179960	148760
Q8VEC4	Q8VEC4	Calcium homeostasis modulator protein 2	Calhm2	sp|Q8VEC4|CAHM2_MOUSE Calcium homeostasis modulator protein 2 OS=Mus musculus GN=Calhm2 PE=2 SV=1	3	15.5	0	117640	122010	177270	105900	113770	142390	160020	123290	120380	117120	119000	132630	140230	142850	158430	155280
Q5D1E7	Q5D1E7	Ribonuclease ZC3H12A	Zc3h12a	sp|Q5D1E7|ZC12A_MOUSE Ribonuclease ZC3H12A OS=Mus musculus GN=Zc3h12a PE=1 SV=2	3	7	0	169620	162070	176960	72753	142090	93313	186830	137840	169590	137090	92785	71522	157740	108560	173230	178650
Q6YGZ1	Q6YGZ1	Heparanase;Heparanase 8 kDa subunit;Heparanase 50 kDa subunit	Hpse	sp|Q6YGZ1|HPSE_MOUSE Heparanase OS=Mus musculus GN=Hpse PE=1 SV=3	2	3.7	0	145730	125080	141670	131000	119260	180960	130400	100420	120270	101020	99027	141840	151440	173120	170950	135480
P39655	P39655	Arachidonate 12-lipoxygenase, 12S-type	Alox12	sp|P39655|LOX12_MOUSE Arachidonate 12-lipoxygenase, 12S-type OS=Mus musculus GN=Alox12 PE=1 SV=4	4	8.4	0	272490	140680	167140	96957	108560	109050	128880	118940	292930	122190	111070	92416	119930	103270	136260	142000
Q6ZPF4	Q6ZPF4	Formin-like protein 3	Fmnl3	sp|Q6ZPF4|FMNL3_MOUSE Formin-like protein 3 OS=Mus musculus GN=Fmnl3 PE=1 SV=2	4	4.2	0	157140	147120	190600	83398	129080	110960	176210	131940	125640	130800	101490	81861	136910	143210	183230	168260
Q8BTH8	Q8BTH8	Casein kinase I isoform gamma-1	Csnk1g1	sp|Q8BTH8|KC1G1_MOUSE Casein kinase I isoform gamma-1 OS=Mus musculus GN=Csnk1g1 PE=1 SV=2	6	14.6	0	153540	134830	169760	114330	110450	105300	154210	131720	154950	148160	111480	89962	143750	127350	168490	153340
Q6PGN3	Q6PGN3	Serine/threonine-protein kinase DCLK2	Dclk2	sp|Q6PGN3|DCLK2_MOUSE Serine/threonine-protein kinase DCLK2 OS=Mus musculus GN=Dclk2 PE=1 SV=1	3	5.7	0	150630	152320	200780	83232	122200	152320	146060	120010	124670	117890	115110	88290	167660	134770	167770	150320
Q8R5K2	Q8R5K2	Ubiquitin carboxyl-terminal hydrolase 33	Usp33	sp|Q8R5K2|UBP33_MOUSE Ubiquitin carboxyl-terminal hydrolase 33 OS=Mus musculus GN=Usp33 PE=1 SV=2	6	7.7	0	147750	131410	164520	112940	130520	119270	150830	122890	126630	127430	123490	95565	145160	148600	176290	142520
Q9JLM8	Q9JLM8	Serine/threonine-protein kinase DCLK1	Dclk1	sp|Q9JLM8|DCLK1_MOUSE Serine/threonine-protein kinase DCLK1 OS=Mus musculus GN=Dclk1 PE=1 SV=1	4	7.5	0	101980	83661	140300	153310	109310	253350	155320	135630	92726	72064	91436	160470	150460	268670	176920	154040
Q9D6K9	Q9D6K9	Ceramide synthase 5	Cers5	sp|Q9D6K9|CERS5_MOUSE Ceramide synthase 5 OS=Mus musculus GN=Cers5 PE=1 SV=1	2	3.9	0	125080	144450	188060	118590	118330	134100	154650	119780	119810	130910	108890	114800	143020	147150	170950	139700
E9PY16	E9PY16		Adap1	tr|E9PY16|E9PY16_MOUSE Protein Adap1 OS=Mus musculus GN=Adap1 PE=1 SV=1	2	7.5	0	157850	144150	163840	94928	106330	115510	192960	138110	147140	129800	90743	86458	149700	123000	196250	191750
Q9DAM7	Q9DAM7	Transmembrane protein 263	Tmem263	sp|Q9DAM7|TM263_MOUSE Transmembrane protein 263 OS=Mus musculus GN=Tmem263 PE=2 SV=1	3	42.6	0	163390	145170	173220	79347	152370	79063	179460	140040	163570	131040	111660	63793	155940	95748	299300	180190
Q8BWG9	Q8BWG9	Calcium release-activated calcium channel protein 1	Orai1	sp|Q8BWG9|CRCM1_MOUSE Calcium release-activated calcium channel protein 1 OS=Mus musculus GN=Orai1 PE=2 SV=1	1	4.3	0	175530	129140	147910	81098	138780	76803	222850	150450	127310	138920	113060	82419	193380	108750	229740	159190
P34928	P34928	Apolipoprotein C-I;Truncated apolipoprotein C-I	Apoc1	sp|P34928|APOC1_MOUSE Apolipoprotein C-I OS=Mus musculus GN=Apoc1 PE=1 SV=1	1	10.2	0	76022	71297	159660	221780	148110	300520	121630	118500	84698	50490	131500	229610	203530	251660	137910	110040
Q9ESN9	Q9ESN9	C-Jun-amino-terminal kinase-interacting protein 3	Mapk8ip3	sp|Q9ESN9|JIP3_MOUSE C-Jun-amino-terminal kinase-interacting protein 3 OS=Mus musculus GN=Mapk8ip3 PE=1 SV=1	4	3.5	0	162580	154140	194100	101270	126870	97799	175930	133860	152300	142640	103220	73696	135860	102260	191920	196250
O88396	O88396	GrpE protein homolog 2, mitochondrial	Grpel2	sp|O88396|GRPE2_MOUSE GrpE protein homolog 2, mitochondrial OS=Mus musculus GN=Grpel2 PE=2 SV=2	2	16.1	0	156130	146780	196490	113670	135030	104390	151110	108940	141100	117710	113160	105480	155770	124910	179750	152880
Q8R087	Q8R087	Beta-1,4-galactosyltransferase 7;Xylosylprotein 4-beta-galactosyltransferase	B4galt7	sp|Q8R087|B4GT7_MOUSE Beta-1,4-galactosyltransferase 7 OS=Mus musculus GN=B4galt7 PE=2 SV=1	2	9.2	0	171970	139360	168690	114900	110840	98797	167320	143060	129180	132230	122510	102380	174450	100380	195380	142340
Q9CQ89	Q9CQ89	Protein CutA	Cuta	sp|Q9CQ89|CUTA_MOUSE Protein CutA OS=Mus musculus GN=Cuta PE=2 SV=3	2	14.7	0	176170	144590	184550	96482	137940	86544	145300	133930	142750	170070	100500	90979	200060	105140	161790	165350
B1AVP0	B1AVP0	Phosphatase and actin regulator	Phactr2	tr|B1AVP0|B1AVP0_MOUSE Phosphatase and actin regulator OS=Mus musculus GN=Phactr2 PE=3 SV=1	1	1.7	0	162870	146280	188930	59610	142360	83485	231660	168190	129270	166110	116050	63036	146690	99070	248390	197460
Q6NXH3	Q6NXH3	Vasculin	Gpbp1	sp|Q6NXH3|GPBP1_MOUSE Vasculin OS=Mus musculus GN=Gpbp1 PE=1 SV=1	4	12.1	0	164560	158250	181540	82581	166510	79882	176790	144290	157100	126830	107540	78507	159570	115590	193560	179800
A0A0A6YXZ4;A0A075B674;A0A0A6YVW3;A0A075B5Y4;A0A075B5X2;A0A075B5T7;P06327	A0A0A6YXZ4;A0A075B674;A0A0A6YVW3;A0A075B5Y4;A0A075B5X2;A0A075B5T7;P06327	Ig heavy chain V region VH558 A1/A4	Ighv1-62-2;Ighv1-78;Ighv1-23;Ighv1-81;Ighv1-63;Ighv1-7;Gm5629	tr|A0A0A6YXZ4|A0A0A6YXZ4_MOUSE Protein Ighv1-62-2 (Fragment) OS=Mus musculus GN=Ighv1-62-2 PE=4 SV=1;tr|A0A075B674|A0A075B674_MOUSE Protein Ighv1-78 OS=Mus musculus GN=Ighv1-78 PE=4 SV=1;tr|A0A0A6YVW3|A0A0A6YVW3_MOUSE Protein Ighv1-23 (Fragment) OS=Mus mus	2	16.8	0	102790	103290	160490	248660	107520	115860	182350	142080	107810	85203	99412	137830	121390	145400	222180	214170
P98064	P98064	Mannan-binding lectin serine protease 1;Mannan-binding lectin serine protease 1 heavy chain;Mannan-binding lectin serine protease 1 light chain	Masp1	sp|P98064|MASP1_MOUSE Mannan-binding lectin serine protease 1 OS=Mus musculus GN=Masp1 PE=1 SV=2	3	6.8	0	116050	135770	183000	124320	158650	162550	128780	117060	159280	117980	151680	115930	141320	109530	154120	132600
Q8BGP6	Q8BGP6	Solute carrier family 25 member 40	Slc25a40	sp|Q8BGP6|S2540_MOUSE Solute carrier family 25 member 40 OS=Mus musculus GN=Slc25a40 PE=2 SV=1	2	8.3	0	170580	155420	191780	102220	112340	114690	157320	135110	136480	123060	138100	106250	142060	111240	165760	159850
Q8BTI9	Q8BTI9	Phosphatidylinositol 4,5-bisphosphate 3-kinase catalytic subunit beta isoform	Pik3cb	sp|Q8BTI9|PK3CB_MOUSE Phosphatidylinositol 4,5-bisphosphate 3-kinase catalytic subunit beta isoform OS=Mus musculus GN=Pik3cb PE=1 SV=2	4	3.8	0	175480	149450	162830	73319	152800	130080	184470	166430	149050	132560	111480	69623	148740	114420	180900	163760
Q8R516	Q8R516	E3 ubiquitin-protein ligase MIB2	Mib2	sp|Q8R516|MIB2_MOUSE E3 ubiquitin-protein ligase MIB2 OS=Mus musculus GN=Mib2 PE=1 SV=2	3	4.5	0	139150	145290	159520	115040	138840	133890	157770	139160	155040	120340	127150	93451	153100	126720	159710	149160
P04184	P04184	Thymidine kinase, cytosolic	Tk1	sp|P04184|KITH_MOUSE Thymidine kinase, cytosolic OS=Mus musculus GN=Tk1 PE=2 SV=3	2	10.3	0	125570	139020	254880	99639	126630	130860	176670	137170	117840	110040	118260	112490	130840	165760	167760	139870
Q8C6U2	Q8C6U2	PQ-loop repeat-containing protein 3	Pqlc3	sp|Q8C6U2|PQLC3_MOUSE PQ-loop repeat-containing protein 3 OS=Mus musculus GN=Pqlc3 PE=2 SV=1	2	15.3	0	148530	115010	174040	129450	118070	162770	156810	134950	141480	124030	93197	130690	139360	134030	163410	154270
Q8K211	Q8K211	High affinity copper uptake protein 1	Slc31a1	sp|Q8K211|COPT1_MOUSE High affinity copper uptake protein 1 OS=Mus musculus GN=Slc31a1 PE=2 SV=1	1	9.7	0	163020	166600	192080	91809	140910	97489	177320	133640	151630	129860	110240	92483	163970	106860	169420	171840
Q99LN9	Q99LN9	Deoxyhypusine hydroxylase	Dohh	sp|Q99LN9|DOHH_MOUSE Deoxyhypusine hydroxylase OS=Mus musculus GN=Dohh PE=2 SV=2	3	23.2	0	163710	146270	195730	82353	138050	97236	186240	140660	136000	163040	105930	86049	170830	109450	189400	168800
Q9ERE3	Q9ERE3	Serine/threonine-protein kinase Sgk3	Sgk3	sp|Q9ERE3|SGK3_MOUSE Serine/threonine-protein kinase Sgk3 OS=Mus musculus GN=Sgk3 PE=1 SV=1	3	10.1	0	180140	174850	191030	77898	134460	107350	167220	134940	148530	151950	107870	86868	167390	122820	180290	141110
Q8VC16	Q8VC16	Leucine-rich repeat-containing protein 14	Lrrc14	sp|Q8VC16|LRC14_MOUSE Leucine-rich repeat-containing protein 14 OS=Mus musculus GN=Lrrc14 PE=2 SV=1	2	4.1	0	159190	158760	200610	79550	121590	108670	182880	154470	155860	118670	110700	87227	163110	137460	196560	144120
Q62084	Q62084	Protein phosphatase 1 regulatory subunit 14B	Ppp1r14b	sp|Q62084|PP14B_MOUSE Protein phosphatase 1 regulatory subunit 14B OS=Mus musculus GN=Ppp1r14b PE=1 SV=2	1	17	0	75747	306290	235270	21352	201470	64144	302500	257510	306950	153710	56354	77577	262040	73028	213730	177400
Q5SWK7	Q5SWK7	RING finger protein 145	Rnf145	sp|Q5SWK7|RN145_MOUSE RING finger protein 145 OS=Mus musculus GN=Rnf145 PE=2 SV=1	2	6	0	158940	153590	192270	111830	119600	105610	150840	141400	147560	124200	128690	106190	168030	111630	175550	151620
Q02956	Q02956	Protein kinase C zeta type	Prkcz	sp|Q02956|KPCZ_MOUSE Protein kinase C zeta type OS=Mus musculus GN=Prkcz PE=1 SV=2	1	2.2	0	169930	146150	180950	92844	129990	107210	189890	168620	148110	136430	98268	82500	185940	114480	197150	145330
P59178	P59178	Lethal(3)malignant brain tumor-like protein 2	L3mbtl2	sp|P59178|LMBL2_MOUSE Lethal(3)malignant brain tumor-like protein 2 OS=Mus musculus GN=L3mbtl2 PE=1 SV=2	5	7.5	0	142890	137200	186440	111930	122300	133420	160450	143550	144470	127700	105560	115470	142800	135600	182550	155310
E0CZ16	E0CZ16	Kelch-like protein 3	Klhl3	sp|E0CZ16|KLHL3_MOUSE Kelch-like protein 3 OS=Mus musculus GN=Klhl3 PE=1 SV=2	2	3.7	0	174800	164810	166210	105350	159670	101960	150940	139420	136030	132180	136440	87150	122270	133660	188700	166760
Q7TNL3	Q7TNL3	Serine/threonine-protein kinase 40	Stk40	sp|Q7TNL3|STK40_MOUSE Serine/threonine-protein kinase 40 OS=Mus musculus GN=Stk40 PE=2 SV=1	2	3.9	0	146010	143270	164060	105330	124740	144320	180890	134310	155510	158910	99013	100440	151350	138930	164730	142290
Q9CSV6	Q9CSV6	Vesicle transport protein SFT2C	Sft2d3	sp|Q9CSV6|SFT2C_MOUSE Vesicle transport protein SFT2C OS=Mus musculus GN=Sft2d3 PE=2 SV=2	1	6.7	0	159690	146060	175910	97327	140610	130970	160820	126780	138610	104690	123940	123760	153530	137820	174280	159960
Q8VD00	Q8VD00	Transmembrane protein 97	Tmem97	sp|Q8VD00|TMM97_MOUSE Transmembrane protein 97 OS=Mus musculus GN=Tmem97 PE=2 SV=1	2	8.5	0	108780	90736	182640	154240	103470	261100	140890	122300	110880	108790	121670	143380	135870	273750	142100	143700
Q8CCE9	Q8CCE9	Transcription factor E4F1	E4f1	sp|Q8CCE9|E4F1_MOUSE Transcription factor E4F1 OS=Mus musculus GN=E4f1 PE=1 SV=2	5	13.7	0	148670	139040	204880	89855	133360	105910	170260	137900	134730	146220	123070	105410	168930	129500	178640	166390
Q8BH70	Q8BH70	F-box/LRR-repeat protein 4	Fbxl4	sp|Q8BH70|FBXL4_MOUSE F-box/LRR-repeat protein 4 OS=Mus musculus GN=Fbxl4 PE=2 SV=1	2	4.7	0	142070	147620	186320	112000	130720	145880	147950	138790	131990	124250	132840	122300	138480	131420	174760	148950
Q8BP74	Q8BP74	L-seryl-tRNA(Sec) kinase	Pstk	sp|Q8BP74|PSTK_MOUSE L-seryl-tRNA(Sec) kinase OS=Mus musculus GN=Pstk PE=1 SV=2	4	12.8	0	181400	172060	189130	98906	161150	111130	165740	144340	138120	143120	103110	100270	146220	111700	161900	162190
O54826	O54826	Protein AF-10	Mllt10	sp|O54826|AF10_MOUSE Protein AF-10 OS=Mus musculus GN=Mllt10 PE=1 SV=2	3	3.9	0	158000	148900	184440	105750	131530	111870	162630	136810	144720	147460	118690	108330	154070	124030	171290	163010
Q8C460	Q8C460	ERI1 exoribonuclease 3	Eri3	sp|Q8C460|ERI3_MOUSE ERI1 exoribonuclease 3 OS=Mus musculus GN=Eri3 PE=1 SV=1	3	8.3	0	183730	162220	169490	86605	133490	93796	191870	147030	133980	148230	117070	97127	179060	107540	194530	170520
Q00196	Q00196	POU domain, class 2, transcription factor 2	Pou2f2	sp|Q00196|PO2F2_MOUSE POU domain, class 2, transcription factor 2 OS=Mus musculus GN=Pou2f2 PE=2 SV=4	6	21.2	0	158400	136720	188780	105190	131350	122170	157530	143110	133040	117050	124350	114680	159910	139440	163470	182600
P01910	P01910	H-2 class II histocompatibility antigen, A-K alpha chain	H2-Aa	sp|P01910|HA2K_MOUSE H-2 class II histocompatibility antigen, A-K alpha chain OS=Mus musculus GN=H2-Aa PE=1 SV=2	1	6.6	0	95487	97951	212380	202350	98278	247210	171300	124770	80362	55498	163070	218460	133200	224400	158970	147500
Q9DAV6	Q9DAV6		Serpinb9b	tr|Q9DAV6|Q9DAV6_MOUSE Protein Serpinb9b OS=Mus musculus GN=Serpinb9b PE=2 SV=1	5	14.6	0	146570	117900	184080	106140	144860	137310	191900	144600	138200	125610	112890	123140	144110	147280	171680	149250
Q3V1Z5	Q3V1Z5	40S ribosomal protein S4	Rps4l	tr|Q3V1Z5|Q3V1Z5_MOUSE Protein Rps4l OS=Mus musculus GN=Rps4l PE=2 SV=1	15	40.8	0	141850	110240	181490	123770	127690	140040	171580	137130	142120	100540	137170	139330	143800	148490	175660	165450
Q64729	Q64729	TGF-beta receptor type-1	Tgfbr1	sp|Q64729|TGFR1_MOUSE TGF-beta receptor type-1 OS=Mus musculus GN=Tgfbr1 PE=1 SV=1	4	13.1	0	152030	135570	178820	119700	140520	103660	167470	147530	144700	125520	110770	108280	168070	142260	177240	172060
B7ZCM9;P0C872	B7ZCM9;P0C872	JmjC domain-containing protein 7	Gm28042;Jmjd7	tr|B7ZCM9|B7ZCM9_MOUSE Protein Gm28042 OS=Mus musculus GN=Gm28042 PE=4 SV=1;sp|P0C872|JMJD7_MOUSE JmjC domain-containing protein 7 OS=Mus musculus GN=Jmjd7 PE=2 SV=1	2	3.5	0	155510	147940	186610	107750	137790	156320	145300	113540	152360	117620	128130	102860	164500	147460	178350	155710
P21300	P21300	Aldose reductase-related protein 1	Akr1b7	sp|P21300|ALD1_MOUSE Aldose reductase-related protein 1 OS=Mus musculus GN=Akr1b7 PE=2 SV=4	5	14.6	0	125770	140970	174700	107740	131330	138840	186380	139350	132560	130590	124640	114240	168690	146220	185010	149330
Q8C8N2	Q8C8N2	Protein SCAI	Scai	sp|Q8C8N2|SCAI_MOUSE Protein SCAI OS=Mus musculus GN=Scai PE=1 SV=2	3	6.4	0	176620	144580	173690	92983	145750	116290	186900	149590	149190	133000	102470	117080	158250	129440	177950	158320
Q9DCK4	Q9DCK4	Zinc finger protein 414	Znf414	sp|Q9DCK4|ZN414_MOUSE Zinc finger protein 414 OS=Mus musculus GN=Znf414 PE=2 SV=1	3	20.7	0	186310	163560	177240	80441	135240	114080	168800	131110	169990	150950	110410	94283	157550	127200	192480	181660
O55042	O55042	Alpha-synuclein	Snca	sp|O55042|SYUA_MOUSE Alpha-synuclein OS=Mus musculus GN=Snca PE=1 SV=2	1	9.3	0	217930	168390	169040	76840	116370	91147	201410	163650	192460	134080	112310	62513	159290	124310	240590	193750
Q80VM4	Q80VM4	Zinc finger protein 579	Znf579	sp|Q80VM4|ZN579_MOUSE Zinc finger protein 579 OS=Mus musculus GN=Znf579 PE=1 SV=1	2	6.4	0	174420	164400	178020	86141	126710	114800	197260	152900	152850	121050	117070	94515	162590	128850	180370	187260
Q9CZU4	Q9CZU4	GTPase Era, mitochondrial	Eral1	sp|Q9CZU4|ERAL1_MOUSE GTPase Era, mitochondrial OS=Mus musculus GN=Eral1 PE=2 SV=1	2	6.2	0	155860	153820	190860	129560	124240	130420	157110	141200	138390	113260	134440	139860	151420	137920	165820	129930
Q3USJ8	Q3USJ8	F-BAR and double SH3 domains protein 2	Fchsd2	sp|Q3USJ8|FCSD2_MOUSE F-BAR and double SH3 domains protein 2 OS=Mus musculus GN=Fchsd2 PE=1 SV=2	3	6.4	0	192730	152200	180380	78211	130090	119330	175860	145250	147130	147120	118170	100530	150830	120410	204550	183640
Q61235	Q61235	Beta-2-syntrophin	Sntb2	sp|Q61235|SNTB2_MOUSE Beta-2-syntrophin OS=Mus musculus GN=Sntb2 PE=1 SV=2	3	9.4	0	130880	135660	221110	77615	115790	151320	232770	184450	157710	73725	131300	97523	136470	128260	223760	216300
P48381	P48381	Transcription factor RFX3	Rfx3	sp|P48381|RFX3_MOUSE Transcription factor RFX3 OS=Mus musculus GN=Rfx3 PE=1 SV=2	3	8.3	0	166500	164590	203160	105110	139850	113110	173340	120930	152500	149160	126650	94423	141140	147310	171690	156600
Q9D2X0	Q9D2X0	Ankyrin repeat domain-containing protein 39	Ankrd39	sp|Q9D2X0|ANR39_MOUSE Ankyrin repeat domain-containing protein 39 OS=Mus musculus GN=Ankrd39 PE=2 SV=1	2	16.9	0	175670	159830	159810	107570	132090	132920	171460	138560	139840	136650	116860	106000	152510	132390	173840	184130
Q7TQC5	Q7TQC5	Aprataxin	Aptx	sp|Q7TQC5|APTX_MOUSE Aprataxin OS=Mus musculus GN=Aptx PE=1 SV=2	1	5.3	0	136800	122970	167950	151040	149250	165220	138130	115450	122810	127620	122460	152780	188070	177510	140420	135880
Q9JLV1	Q9JLV1	BAG family molecular chaperone regulator 3	Bag3	sp|Q9JLV1|BAG3_MOUSE BAG family molecular chaperone regulator 3 OS=Mus musculus GN=Bag3 PE=1 SV=2	3	5.9	0	162250	149920	180880	83063	149700	118980	210150	146190	136880	127570	112310	82670	159620	142050	231460	188850
Q9CPS6	Q9CPS6	Histidine triad nucleotide-binding protein 3	Hint3	sp|Q9CPS6|HINT3_MOUSE Histidine triad nucleotide-binding protein 3 OS=Mus musculus GN=Hint3 PE=2 SV=1	2	27.3	0	218870	184810	207080	57452	137290	80901	198600	168460	167730	152410	122890	68186	173620	121540	222820	182360
Q61542	Q61542	StAR-related lipid transfer protein 3	Stard3	sp|Q61542|STAR3_MOUSE StAR-related lipid transfer protein 3 OS=Mus musculus GN=Stard3 PE=2 SV=1	4	15.2	0	160960	144350	171140	126700	120790	127810	173050	153940	127860	127410	125260	122360	147900	142340	185350	167390
A0A075B5Z0;A0A075B5Z2;L7N479;P01853;P06334	A0A075B5Z0;A0A075B5Z2;L7N479;P01853;P06334	T-cell receptor gamma chain C region C10.5;T-cell receptor gamma chain C region DFL12	Tcrg-C1;Tcrg-C2;Tcrg-C3	tr|A0A075B5Z0|A0A075B5Z0_MOUSE Protein Tcrg-C1 OS=Mus musculus GN=Tcrg-C1 PE=4 SV=1;tr|A0A075B5Z2|A0A075B5Z2_MOUSE Protein Tcrg-C2 OS=Mus musculus GN=Tcrg-C2 PE=4 SV=1;tr|L7N479|L7N479_MOUSE Protein Tcrg-C3 OS=Mus musculus GN=Tcrg-C3 PE=4 SV=1;sp|P01853|TC	2	16.3	0	184510	173460	205220	128110	147940	112120	150890	113620	156740	127430	107510	135970	146170	146390	151270	151870
Q3TDV8	Q3TDV8		Zfp444	tr|Q3TDV8|Q3TDV8_MOUSE Protein Zfp444 OS=Mus musculus GN=Zfp444 PE=2 SV=1	4	23	0	162310	153530	178180	112530	145340	119700	159270	136690	157470	136490	125990	94752	173710	129850	188620	174250
Q8CGR7	Q8CGR7	Uridine phosphorylase 2	Upp2	sp|Q8CGR7|UPP2_MOUSE Uridine phosphorylase 2 OS=Mus musculus GN=Upp2 PE=2 SV=1	1	4.1	0	177930	171460	181900	112960	148820	106930	163870	139650	167820	151880	121690	84985	149520	132030	194200	158600
Q61508	Q61508	Extracellular matrix protein 1	Ecm1	sp|Q61508|ECM1_MOUSE Extracellular matrix protein 1 OS=Mus musculus GN=Ecm1 PE=1 SV=2	3	7.5	0	162360	141180	214440	117150	129430	116260	146060	128430	175260	129420	142630	127370	154810	133860	172310	163580
Q9EPK6	Q9EPK6	Nucleotide exchange factor SIL1	Sil1	sp|Q9EPK6|SIL1_MOUSE Nucleotide exchange factor SIL1 OS=Mus musculus GN=Sil1 PE=1 SV=2	3	8.8	0	175210	151800	202180	107800	130660	141800	182360	152860	146320	116240	111090	123730	153320	137120	172410	160620
Q9WV96	Q9WV96	Mitochondrial import inner membrane translocase subunit Tim10 B	Timm10b	sp|Q9WV96|T10B_MOUSE Mitochondrial import inner membrane translocase subunit Tim10 B OS=Mus musculus GN=Timm10b PE=2 SV=1	2	35	0	188310	126660	221990	121440	138410	126850	158660	117910	137370	150630	125070	124110	198090	138750	154800	141300
Q9Z183;Q9Z184	Q9Z183	Protein-arginine deiminase type-4	Padi4	sp|Q9Z183|PADI4_MOUSE Protein-arginine deiminase type-4 OS=Mus musculus GN=Padi4 PE=2 SV=3	6	15.5	0	119090	130700	224940	122500	114060	188700	173650	131740	132040	128710	142290	107710	144890	206620	171680	148820
Q8R3P8	Q8R3P8		Rnf113a1	tr|Q8R3P8|Q8R3P8_MOUSE Protein Rnf113a1 OS=Mus musculus GN=Rnf113a1 PE=1 SV=1	9	37.5	0	187740	173060	205560	82839	149450	101220	187250	166000	143740	160650	107720	83761	185960	110120	199190	198310
Q6RUT7	Q6RUT7	Protein CCSMST1	Ccsmst1	sp|Q6RUT7|CSMT1_MOUSE Protein CCSMST1 OS=Mus musculus GN=Ccsmst1 PE=3 SV=1	1	18.4	0	156860	146110	214430	129670	137260	170350	143670	106820	100470	122980	134920	165270	172150	167930	165920	147360
Q5SXY1	Q5SXY1	Cytospin-B	Specc1	sp|Q5SXY1|CYTSB_MOUSE Cytospin-B OS=Mus musculus GN=Specc1 PE=1 SV=2	4	4	0	168620	125990	169110	111450	133370	138640	174830	157990	157860	121910	122070	111950	145980	177950	168710	189150
Q3UJP5	Q3UJP5	Protein C8orf37 homolog		sp|Q3UJP5|CH037_MOUSE Protein C8orf37 homolog OS=Mus musculus PE=1 SV=1	1	7.2	0	184230	159400	199670	87357	147170	116780	201880	140530	139370	134740	107150	111770	174000	124530	205090	181840
Q8QZR8	Q8QZR8	Cyclin-related protein FAM58B	Fam58b	sp|Q8QZR8|FA58B_MOUSE Cyclin-related protein FAM58B OS=Mus musculus GN=Fam58b PE=2 SV=2	2	12.4	0	186430	180260	183330	101180	149160	112340	187620	137890	145860	153130	111340	120800	155390	132990	184420	146730
Q80Y55	Q80Y55	BSD domain-containing protein 1	Bsdc1	sp|Q80Y55|BSDC1_MOUSE BSD domain-containing protein 1 OS=Mus musculus GN=Bsdc1 PE=2 SV=1	7	23.4	0	134960	187930	246430	72861	168270	94151	257460	164960	177270	130330	135820	77243	153930	91676	214510	203240
P18608	P18608	Non-histone chromosomal protein HMG-14	Hmgn1	sp|P18608|HMGN1_MOUSE Non-histone chromosomal protein HMG-14 OS=Mus musculus GN=Hmgn1 PE=1 SV=2	1	31.2	0	244430	209990	206360	50314	188370	59492	181140	141340	153490	421740	124320	69697	174130	65376	215110	220070
A0A0B4J1G7;P04214	A0A0B4J1G7;P04214	T-cell receptor beta chain V region E1	Trbv1	tr|A0A0B4J1G7|A0A0B4J1G7_MOUSE Protein Trbv1 (Fragment) OS=Mus musculus GN=Trbv1 PE=4 SV=1;sp|P04214|TVB6_MOUSE T-cell receptor beta chain V region E1 OS=Mus musculus PE=1 SV=1	1	9.5	0	155970	154080	197510	143770	130980	147580	153660	118110	144620	130930	151180	137740	143270	141630	175170	139650
P58283	P58283	E3 ubiquitin-protein ligase RNF216	Rnf216	sp|P58283|RN216_MOUSE E3 ubiquitin-protein ligase RNF216 OS=Mus musculus GN=Rnf216 PE=1 SV=3	2	2.6	0	146760	132560	192370	145250	128340	170050	177560	144120	119050	113440	110360	128660	152870	169940	188960	164480
P51860	P51860	Nucleosome assembly protein 1-like 2	Nap1l2	sp|P51860|NP1L2_MOUSE Nucleosome assembly protein 1-like 2 OS=Mus musculus GN=Nap1l2 PE=2 SV=2	1	3.9	0	162380	147090	226610	105180	115900	151060	151250	124400	127500	185470	120640	101470	161310	182110	184620	168870
Q91WK7	Q91WK7	Ankyrin repeat domain-containing protein 54	Ankrd54	sp|Q91WK7|ANR54_MOUSE Ankyrin repeat domain-containing protein 54 OS=Mus musculus GN=Ankrd54 PE=1 SV=1	1	9	0	166850	161780	216200	122320	143470	121280	168050	135580	125540	154650	125540	89979	183810	122500	194930	183950
O08848	O08848	60 kDa SS-A/Ro ribonucleoprotein	Trove2	sp|O08848|RO60_MOUSE 60 kDa SS-A/Ro ribonucleoprotein OS=Mus musculus GN=Trove2 PE=1 SV=1	2	5.8	0	179400	171520	195500	78975	126830	123880	211650	166750	143490	154650	137650	90674	152870	128330	209220	168650
Q6P549	Q6P549	Phosphatidylinositol 3,4,5-trisphosphate 5-phosphatase 2	Inppl1	sp|Q6P549|SHIP2_MOUSE Phosphatidylinositol 3,4,5-trisphosphate 5-phosphatase 2 OS=Mus musculus GN=Inppl1 PE=1 SV=1	5	5.5	0	166050	146160	162330	84865	126590	142300	242070	168210	166560	130630	107140	95049	169940	145240	211340	181460
Q9CR30	Q9CR30	Josephin-2	Josd2	sp|Q9CR30|JOS2_MOUSE Josephin-2 OS=Mus musculus GN=Josd2 PE=2 SV=1	3	20.2	0	163310	142390	182350	104880	144720	134680	177430	167300	160430	152110	109670	118460	173300	144520	169940	148520
Q8BU00	Q8BU00	Zinc finger protein Pegasus	Ikzf5	sp|Q8BU00|IKZF5_MOUSE Zinc finger protein Pegasus OS=Mus musculus GN=Ikzf5 PE=2 SV=1	3	10.7	0	144610	153840	212810	129660	125590	144970	158400	130410	144790	132750	140780	120630	151250	162340	167560	168170
Q60644;Q9Z0Y9	Q60644;Q9Z0Y9	Oxysterols receptor LXR-beta;Oxysterols receptor LXR-alpha	Nr1h2;Nr1h3	sp|Q60644|NR1H2_MOUSE Oxysterols receptor LXR-beta OS=Mus musculus GN=Nr1h2 PE=1 SV=1;sp|Q9Z0Y9|NR1H3_MOUSE Oxysterols receptor LXR-alpha OS=Mus musculus GN=Nr1h3 PE=1 SV=3	2	6.3	0	198120	173640	189110	82754	141250	97161	200490	171930	172710	189700	93910	82560	190220	102890	214010	194240
A0A075B5K0;P01637	A0A075B5K0;P01637	Ig kappa chain V-V region T1	Igkv14-126	tr|A0A075B5K0|A0A075B5K0_MOUSE Uncharacterized protein OS=Mus musculus GN=Igkv14-126 PE=4 SV=3;sp|P01637|KV5A5_MOUSE Ig kappa chain V-V region T1 OS=Mus musculus PE=4 SV=1	2	26.5	0	141840	122850	209660	138030	151430	142570	142360	139400	148590	131270	134930	121300	189250	137060	182980	160930
Q8BGW5	Q8BGW5	SOSS complex subunit B2	Nabp1	sp|Q8BGW5|SOSB2_MOUSE SOSS complex subunit B2 OS=Mus musculus GN=Nabp1 PE=2 SV=1	3	20.7	0	216860	198290	199990	81149	160140	94226	199820	162090	181710	164150	107060	69750	177290	105400	214580	176300
O89114	O89114	DnaJ homolog subfamily B member 5	Dnajb5	sp|O89114|DNJB5_MOUSE DnaJ homolog subfamily B member 5 OS=Mus musculus GN=Dnajb5 PE=2 SV=1	4	17.8	0	173370	159680	199100	112190	141980	106250	195660	148680	158770	152200	113520	107210	176390	104930	188460	195140
Q80U44	Q80U44	Zinc finger FYVE domain-containing protein 16	Zfyve16	sp|Q80U44|ZFY16_MOUSE Zinc finger FYVE domain-containing protein 16 OS=Mus musculus GN=Zfyve16 PE=1 SV=2	4	3.9	0	217680	164420	209450	110690	125320	107980	181920	153650	157190	140490	106320	91287	173040	126720	207220	178330
Q3UHD2	Q3UHD2	Glucose-fructose oxidoreductase domain-containing protein 1	Gfod1	sp|Q3UHD2|GFOD1_MOUSE Glucose-fructose oxidoreductase domain-containing protein 1 OS=Mus musculus GN=Gfod1 PE=2 SV=1	2	8.7	0	188300	158100	173170	86698	131910	114380	205680	189170	179560	138290	129260	93307	152920	129020	202400	174200
Q9CWU6	Q9CWU6	Ubiquinol-cytochrome-c reductase complex assembly factor 1	Uqcc1	sp|Q9CWU6|UQCC1_MOUSE Ubiquinol-cytochrome-c reductase complex assembly factor 1 OS=Mus musculus GN=Uqcc1 PE=2 SV=1	4	16.6	0	145640	135650	222710	157110	144740	179820	148710	119720	133420	91392	158240	160810	153480	166580	158090	139150
Q62170	Q62170	P-selectin glycoprotein ligand 1	Selplg	sp|Q62170|SELPL_MOUSE P-selectin glycoprotein ligand 1 OS=Mus musculus GN=Selplg PE=1 SV=2	2	12.6	0	158090	181070	217970	109720	149770	129530	191610	157070	151040	171170	119370	87806	137260	115890	197710	166330
Q3UHI0	Q3UHI0	Serine-rich coiled-coil domain-containing protein 2	Ccser2	sp|Q3UHI0|CCSE2_MOUSE Serine-rich coiled-coil domain-containing protein 2 OS=Mus musculus GN=Ccser2 PE=1 SV=1	3	3.2	0	151980	117650	193870	133440	117270	157110	167850	144680	141360	107960	134410	138640	163400	178400	180500	186990
Q9CRW3	Q9CRW3	UPF0538 protein C2orf76 homolog		sp|Q9CRW3|CB076_MOUSE UPF0538 protein C2orf76 homolog OS=Mus musculus PE=2 SV=2	3	34.1	0	182650	199630	198670	78777	148020	99093	218880	166410	164910	163600	110420	78638	195780	98663	204230	206560
P28660	P28660	Nck-associated protein 1	Nckap1	sp|P28660|NCKP1_MOUSE Nck-associated protein 1 OS=Mus musculus GN=Nckap1 PE=1 SV=2	6	7.5	0	172700	172570	183690	90979	142210	105440	196390	152820	167130	132860	128270	92911	176500	132850	191770	223800
Q99PQ2	Q99PQ2	E3 ubiquitin-protein ligase TRIM11	Trim11	sp|Q99PQ2|TRI11_MOUSE E3 ubiquitin-protein ligase TRIM11 OS=Mus musculus GN=Trim11 PE=1 SV=1	3	10.9	0	171920	146400	189040	111250	140550	137240	165610	149080	189130	147840	117080	99961	180730	132980	188380	162460
Q60738	Q60738	Zinc transporter 1	Slc30a1	sp|Q60738|ZNT1_MOUSE Zinc transporter 1 OS=Mus musculus GN=Slc30a1 PE=1 SV=1	3	12.1	0	142130	160910	189910	126370	152480	185750	164260	116970	174770	107830	136090	118070	154790	129270	192380	174750
Q9Z2L6	Q9Z2L6	Multiple inositol polyphosphate phosphatase 1	Minpp1	sp|Q9Z2L6|MINP1_MOUSE Multiple inositol polyphosphate phosphatase 1 OS=Mus musculus GN=Minpp1 PE=1 SV=3	2	5.4	0	143170	142630	204020	126450	133030	168920	147400	134270	133340	125450	136870	156180	157820	191980	161490	152550
Q91YD9	Q91YD9	Neural Wiskott-Aldrich syndrome protein	Wasl	sp|Q91YD9|WASL_MOUSE Neural Wiskott-Aldrich syndrome protein OS=Mus musculus GN=Wasl PE=1 SV=1	3	7.6	0	195440	191620	208730	101770	143060	96052	206900	148190	169500	167100	141720	92207	162670	94395	191140	174390
P61208	P61208	ADP-ribosylation factor-like protein 4C	Arl4c	sp|P61208|ARL4C_MOUSE ADP-ribosylation factor-like protein 4C OS=Mus musculus GN=Arl4c PE=2 SV=1	1	4.7	0	157170	146770	186030	113000	130230	160570	180540	141970	153840	132210	105260	125130	156100	176090	191160	181270
O08530	O08530	Sphingosine 1-phosphate receptor 1	S1pr1	sp|O08530|S1PR1_MOUSE Sphingosine 1-phosphate receptor 1 OS=Mus musculus GN=S1pr1 PE=1 SV=3	2	6.8	0	169620	152040	220550	134020	138020	157000	162590	124620	148990	131980	160230	131010	140290	141700	177000	151090
Q9CWQ3	Q9CWQ3	Mitochondrial inner membrane protease ATP23 homolog	Xrcc6bp1	sp|Q9CWQ3|ATP23_MOUSE Mitochondrial inner membrane protease ATP23 homolog OS=Mus musculus GN=Xrcc6bp1 PE=2 SV=1	1	4.5	0	157990	129280	200400	133010	155990	181320	180250	137470	111840	129130	115930	115220	196590	161900	186050	173400
Q8R4P9	Q8R4P9	Multidrug resistance-associated protein 7	Abcc10	sp|Q8R4P9|MRP7_MOUSE Multidrug resistance-associated protein 7 OS=Mus musculus GN=Abcc10 PE=2 SV=1	4	4.1	0	150990	149400	182960	120850	137020	159290	175570	152410	136700	121590	132440	143060	150770	154260	209320	182280
Q60847	Q60847	Collagen alpha-1(XII) chain	Col12a1	sp|Q60847|COCA1_MOUSE Collagen alpha-1(XII) chain OS=Mus musculus GN=Col12a1 PE=2 SV=3	2	0.6	0	144680	132470	204180	126910	156860	180500	126380	115960	177750	153970	167060	117990	168700	172630	157020	162970
Q9JJQ0	Q9JJQ0	GPI mannosyltransferase 3	Pigb	sp|Q9JJQ0|PIGB_MOUSE GPI mannosyltransferase 3 OS=Mus musculus GN=Pigb PE=2 SV=2	2	5.4	0	207440	188000	213730	100300	141220	89967	229490	151420	177090	153690	109240	88753	176670	125960	214200	183220
Q8C8U0	Q8C8U0	Liprin-beta-1	Ppfibp1	sp|Q8C8U0|LIPB1_MOUSE Liprin-beta-1 OS=Mus musculus GN=Ppfibp1 PE=1 SV=3	2	3.4	0	164480	151220	184000	117070	134290	161390	184020	153890	133720	148920	126690	98718	146800	172450	216860	190870
P70426	P70426	GTP-binding protein Rit1	Rit1	sp|P70426|RIT1_MOUSE GTP-binding protein Rit1 OS=Mus musculus GN=Rit1 PE=1 SV=1	4	20.5	0	149070	119090	185430	138560	129740	198760	212960	149690	129820	108360	112830	132720	160700	191610	212920	166530
Q8CIB6	Q8CIB6	Transmembrane protein 230	Tmem230	sp|Q8CIB6|TM230_MOUSE Transmembrane protein 230 OS=Mus musculus GN=Tmem230 PE=1 SV=1	2	21.7	0	134240	133160	206850	151250	131590	141670	184550	168860	137150	114550	153520	152800	158030	159330	182120	158220
Q8R3P2	Q8R3P2	Probable E3 ubiquitin-protein ligase DTX2	Dtx2	sp|Q8R3P2|DTX2_MOUSE Probable E3 ubiquitin-protein ligase DTX2 OS=Mus musculus GN=Dtx2 PE=1 SV=2	2	4.4	0	189980	180530	187030	96603	132550	104300	206960	179590	176360	175900	113850	86138	190830	117550	204730	201710
P55098	P55098	Peroxisome biogenesis factor 2	Pex2	sp|P55098|PEX2_MOUSE Peroxisome biogenesis factor 2 OS=Mus musculus GN=Pex2 PE=2 SV=1	1	3.6	0	154390	155040	204970	140310	141870	134520	157120	140460	136110	144580	139350	146910	170540	148360	181360	171930
P62627	P62627	Dynein light chain roadblock-type 1	Dynlrb1	sp|P62627|DLRB1_MOUSE Dynein light chain roadblock-type 1 OS=Mus musculus GN=Dynlrb1 PE=1 SV=3	2	20.8	0	246710	205100	208000	61079	170920	94203	204140	169380	197200	184150	101540	81424	219100	92145	203080	211640
Q9CQQ0	Q9CQQ0	Small integral membrane protein 8	Smim8	sp|Q9CQQ0|SMIM8_MOUSE Small integral membrane protein 8 OS=Mus musculus GN=Smim8 PE=2 SV=1	2	22.7	0	160050	150540	230520	124220	132320	132870	172740	149160	157930	143930	138550	114530	165950	160550	176880	176730
Q9QXA1	Q9QXA1	Cysteine and histidine-rich protein 1	Cyhr1	sp|Q9QXA1|CYHR1_MOUSE Cysteine and histidine-rich protein 1 OS=Mus musculus GN=Cyhr1 PE=1 SV=1	2	8.7	0	174940	177290	246440	100170	142640	113140	183540	163570	188960	139270	140530	99170	173670	119520	206100	178090
Q3U4G0	Q3U4G0	Uncharacterized protein C15orf41 homolog		sp|Q3U4G0|CO041_MOUSE Uncharacterized protein C15orf41 homolog OS=Mus musculus PE=2 SV=2	2	10.3	0	184740	188480	191750	86427	153530	118350	172840	156610	171650	151310	128770	107530	190840	135140	227090	175410
Q62507	Q62507	Cochlin	Coch	sp|Q62507|COCH_MOUSE Cochlin OS=Mus musculus GN=Coch PE=2 SV=2	3	7.4	0	145120	116460	186070	140060	126050	219340	170580	137420	147170	114760	144710	152840	171500	203710	173370	164840
Q00547	Q00547	Hyaluronan mediated motility receptor	Hmmr	sp|Q00547|HMMR_MOUSE Hyaluronan mediated motility receptor OS=Mus musculus GN=Hmmr PE=1 SV=4	5	12.5	0	112500	113240	213570	165480	113180	273560	147640	115850	131000	94527	159680	199510	131800	294250	178260	164490
Q9Z223	Q9Z223	Molybdopterin synthase catalytic subunit	Mocs2	sp|Q9Z223|MOC2B_MOUSE Molybdopterin synthase catalytic subunit OS=Mus musculus GN=Mocs2 PE=2 SV=3	4	22.8	0	200860	200560	212460	99265	153590	92536	207110	173700	185570	180270	110510	80222	177190	109480	206500	207810
Q7TS72	Q7TS72	Inositol-trisphosphate 3-kinase C	Itpkc	sp|Q7TS72|IP3KC_MOUSE Inositol-trisphosphate 3-kinase C OS=Mus musculus GN=Itpkc PE=1 SV=1	5	11.2	0	184900	189580	189220	87464	154980	123670	188440	164510	163030	163050	112940	110770	194760	130380	206350	182300
Q8VID5	Q8VID5	ATP-dependent DNA helicase Q5	Recql5	sp|Q8VID5|RECQ5_MOUSE ATP-dependent DNA helicase Q5 OS=Mus musculus GN=Recql5 PE=2 SV=1	2	2.9	0	180220	143770	191430	136030	139350	167110	162550	146700	136770	139060	128660	135560	160910	179290	193590	158910
Q64692	Q64692	CMP-N-acetylneuraminate-poly-alpha-2,8-sialyltransferase	St8sia4	sp|Q64692|SIA8D_MOUSE CMP-N-acetylneuraminate-poly-alpha-2,8-sialyltransferase OS=Mus musculus GN=St8sia4 PE=2 SV=1	2	7.8	0	139060	136490	198660	178150	123030	216960	154850	116190	131830	112030	162070	188380	152720	197670	171670	150050
Q0VGM9	Q0VGM9	Regulator of telomere elongation helicase 1	Rtel1	sp|Q0VGM9|RTEL1_MOUSE Regulator of telomere elongation helicase 1 OS=Mus musculus GN=Rtel1 PE=1 SV=2	4	5.2	0	189890	172120	197120	94720	147990	155780	181190	154590	158550	162940	123790	113080	161940	166250	171480	173440
Q9CR55	Q9CR55	UPF0547 protein C16orf87 homolog		sp|Q9CR55|CP087_MOUSE UPF0547 protein C16orf87 homolog OS=Mus musculus PE=2 SV=1	2	16.9	0	190970	164690	215330	115330	142790	106320	200200	158060	176490	169110	127110	86707	163390	128480	220230	202750
Q9CWY4	Q9CWY4	Gem-associated protein 7	Gemin7	sp|Q9CWY4|GEMI7_MOUSE Gem-associated protein 7 OS=Mus musculus GN=Gemin7 PE=2 SV=1	1	17.1	0	180330	158420	194230	132210	149160	140290	188010	144710	157200	148910	141240	131120	171870	138870	177950	153110
Q0KL02;A2CG49	Q0KL02	Triple functional domain protein	Trio	sp|Q0KL02|TRIO_MOUSE Triple functional domain protein OS=Mus musculus GN=Trio PE=1 SV=3	7	3	0	187670	171430	210910	110170	125180	137040	193190	161630	183450	156820	120040	87012	186130	139500	217940	179300
Q6TXD4	Q6TXD4	Dynamin-binding protein	Dnmbp	sp|Q6TXD4|DNMBP_MOUSE Dynamin-binding protein OS=Mus musculus GN=Dnmbp PE=1 SV=2	5	4.9	0	214950	181320	199430	93153	139770	114520	202540	150280	191490	174430	99642	88211	190960	137380	213380	211610
A0A075B5K7	A0A075B5K7		Igkv14-100	tr|A0A075B5K7|A0A075B5K7_MOUSE Protein Igkv14-100 OS=Mus musculus GN=Igkv14-100 PE=4 SV=3	1	13.8	0	129750	142890	162610	100520	147890	411110	165260	133190	136570	123440	122830	148280	131300	326910	166880	138230
Q99LH9	Q99LH9	SH3 domain-binding protein 5-like	Sh3bp5l	sp|Q99LH9|3BP5L_MOUSE SH3 domain-binding protein 5-like OS=Mus musculus GN=Sh3bp5l PE=2 SV=1	3	7.9	0	186780	171280	202760	100350	155510	115960	195700	150920	170560	184760	126230	101530	183280	126480	221830	172630
Q8BFX1	Q8BFX1	E3 ubiquitin-protein ligase RNF187	Rnf187	sp|Q8BFX1|RN187_MOUSE E3 ubiquitin-protein ligase RNF187 OS=Mus musculus GN=Rnf187 PE=1 SV=2	1	6.8	0	258970	210620	221600	74259	167160	77479	243580	171240	211780	207570	105820	63110	202960	93868	227600	202520
Q8R2N0	Q8R2N0	Thyroid transcription factor 1-associated protein 26	Ccdc59	sp|Q8R2N0|TAP26_MOUSE Thyroid transcription factor 1-associated protein 26 OS=Mus musculus GN=Ccdc59 PE=2 SV=2	1	7.9	0	233850	176710	188110	79225	182940	77717	230370	180640	187610	182440	116330	77997	210490	117150	226220	203750
Q9WTK7	Q9WTK7	Serine/threonine-protein kinase STK11	Stk11	sp|Q9WTK7|STK11_MOUSE Serine/threonine-protein kinase STK11 OS=Mus musculus GN=Stk11 PE=1 SV=1	6	22.7	0	201890	182190	183560	96353	142720	106490	228690	211990	187040	152460	114380	99146	169970	130240	203940	184400
Q8BG93;D3Z175	Q8BG93;D3Z175	Probable 8-oxo-dGTP diphosphatase NUDT15	Nudt15;Gm5519	sp|Q8BG93|NUD15_MOUSE Probable 8-oxo-dGTP diphosphatase NUDT15 OS=Mus musculus GN=Nudt15 PE=1 SV=1;tr|D3Z175|D3Z175_MOUSE MCG142459 OS=Mus musculus GN=Gm5519 PE=3 SV=1	2	15.3	0	237340	195230	212680	90623	145570	85053	203710	196540	190600	172930	118460	87012	197930	105620	204240	206560
Q8QZS3	Q8QZS3	Folliculin	Flcn	sp|Q8QZS3|FLCN_MOUSE Folliculin OS=Mus musculus GN=Flcn PE=1 SV=1	4	15.9	0	184010	145530	217250	113700	152430	149780	170030	173300	159030	137700	146490	134820	170460	144300	167440	171310
Q9DBG1	Q9DBG1	Sterol 26-hydroxylase, mitochondrial	Cyp27a1	sp|Q9DBG1|CP27A_MOUSE Sterol 26-hydroxylase, mitochondrial OS=Mus musculus GN=Cyp27a1 PE=1 SV=1	2	3.9	0	139240	126070	197570	176660	125930	214800	172760	133810	106760	107540	151590	192470	157770	205470	197600	170940
Q5SNZ0	Q5SNZ0	Girdin	Ccdc88a	sp|Q5SNZ0|GRDN_MOUSE Girdin OS=Mus musculus GN=Ccdc88a PE=1 SV=2	4	2.3	0	147630	135850	194100	121390	158910	176090	177790	162250	144800	116710	140820	126410	174490	195050	192230	189090
Q8BHF7	Q8BHF7	CDP-diacylglycerol--glycerol-3-phosphate 3-phosphatidyltransferase, mitochondrial	Pgs1	sp|Q8BHF7|PGPS1_MOUSE CDP-diacylglycerol--glycerol-3-phosphate 3-phosphatidyltransferase, mitochondrial OS=Mus musculus GN=Pgs1 PE=2 SV=1	3	6.7	0	149000	148180	212530	151220	153690	154370	201020	148380	126920	126040	155220	155550	174230	155090	176190	153900
Q3U1N2	Q3U1N2	Sterol regulatory element-binding protein 2;Processed sterol regulatory element-binding protein 2	Srebf2	sp|Q3U1N2|SRBP2_MOUSE Sterol regulatory element-binding protein 2 OS=Mus musculus GN=Srebf2 PE=1 SV=2	5	7.1	0	189410	135480	236170	145530	134270	146270	175410	146060	145990	138070	140180	137430	177150	157060	173490	175700
Q80VL1	Q80VL1	Tudor and KH domain-containing protein	Tdrkh	sp|Q80VL1|TDRKH_MOUSE Tudor and KH domain-containing protein OS=Mus musculus GN=Tdrkh PE=1 SV=1	2	5.2	0	180640	161280	212720	116560	154470	158260	161970	165500	125750	139420	156030	137810	164800	150660	195460	170040
Q9DC29	Q9DC29	ATP-binding cassette sub-family B member 6, mitochondrial	Abcb6	sp|Q9DC29|ABCB6_MOUSE ATP-binding cassette sub-family B member 6, mitochondrial OS=Mus musculus GN=Abcb6 PE=1 SV=1	4	10.6	0	138490	144170	203450	129280	131250	209680	177280	152720	145520	160790	136800	146440	165430	198200	170650	150330
Q61469	Q61469	Lipid phosphate phosphohydrolase 1	Ppap2a	sp|Q61469|LPP1_MOUSE Lipid phosphate phosphohydrolase 1 OS=Mus musculus GN=Ppap2a PE=1 SV=1	1	3.5	0	113230	114390	200360	189580	128240	183950	220350	149130	131160	98704	140590	210890	124340	185610	228280	206920
Q9D328	Q9D328	Transmembrane protein 35	Tmem35	sp|Q9D328|TMM35_MOUSE Transmembrane protein 35 OS=Mus musculus GN=Tmem35 PE=2 SV=1	2	20.4	0	163100	128280	234120	152620	153320	175670	150800	135000	114400	128020	151080	156750	172950	181430	193180	187410
O70338	O70338	Ribonuclease H1	Rnaseh1	sp|O70338|RNH1_MOUSE Ribonuclease H1 OS=Mus musculus GN=Rnaseh1 PE=2 SV=1	1	6.3	0	169820	172160	217100	120090	149170	128010	196300	160570	150420	168820	137520	120130	175640	127490	205450	184280
Q8K015	Q8K015	Centromere protein O	Cenpo	sp|Q8K015|CENPO_MOUSE Centromere protein O OS=Mus musculus GN=Cenpo PE=2 SV=1	2	7	0	167120	164430	240540	170150	106660	168750	155570	135140	144400	124190	168460	168830	155530	185210	170180	153510
Q9Z1N7	Q9Z1N7	AT-rich interactive domain-containing protein 3B	Arid3b	sp|Q9Z1N7|ARI3B_MOUSE AT-rich interactive domain-containing protein 3B OS=Mus musculus GN=Arid3b PE=2 SV=1	4	9.3	0	162960	156590	209430	135170	151480	153260	169800	137440	156580	145250	167650	137480	176650	150400	182220	165300
F2Z3Z2;Q8BFQ2	F2Z3Z2;Q8BFQ2	Transmembrane protein 229B	Gm5423;TMEM229B	tr|F2Z3Z2|F2Z3Z2_MOUSE Uncharacterized protein OS=Mus musculus GN=Gm5423 PE=4 SV=1;sp|Q8BFQ2|T229B_MOUSE Transmembrane protein 229B OS=Mus musculus GN=TMEM229B PE=2 SV=1	2	18	0	191450	166000	216310	122140	151480	122630	182260	143240	162190	156710	115280	134930	174200	153020	221030	173980
Q9EP52	Q9EP52	Twisted gastrulation protein homolog 1	Twsg1	sp|Q9EP52|TWSG1_MOUSE Twisted gastrulation protein homolog 1 OS=Mus musculus GN=Twsg1 PE=1 SV=1	2	10.8	0	197730	146000	243340	167630	126550	131290	181820	123290	152450	140480	143160	139120	201930	149790	190470	153520
Q9WV72	Q9WV72	Ankyrin repeat and SOCS box protein 3	Asb3	sp|Q9WV72|ASB3_MOUSE Ankyrin repeat and SOCS box protein 3 OS=Mus musculus GN=Asb3 PE=2 SV=2	2	7.2	0	214870	188270	229120	107700	150130	109140	185320	170360	194750	174010	118650	83944	187830	124220	225420	181230
Q9ERZ6	Q9ERZ6	Fidgetin	Fign	sp|Q9ERZ6|FIGN_MOUSE Fidgetin OS=Mus musculus GN=Fign PE=1 SV=1	1	1.7	0	126330	127860	240380	186970	174230	222880	116540	111450	180470	145610	193860	148010	169200	170000	148060	141420
Q5U4H9;J3QND8	Q5U4H9;J3QND8		Ncoa4;Gm6768	tr|Q5U4H9|Q5U4H9_MOUSE Nuclear receptor coactivator 4 OS=Mus musculus GN=Ncoa4 PE=2 SV=1;tr|J3QND8|J3QND8_MOUSE Uncharacterized protein OS=Mus musculus GN=Gm6768 PE=4 SV=1	1	1.8	0	167040	149470	195560	133750	149100	159030	186440	148790	136490	124400	150000	133860	178490	167200	188110	203230
Q91WZ8	Q91WZ8	Dysbindin	Dtnbp1	sp|Q91WZ8|DTBP1_MOUSE Dysbindin OS=Mus musculus GN=Dtnbp1 PE=1 SV=1	1	3.1	0	253710	215540	201580	68963	150030	90186	239590	203700	207030	164840	107140	83732	165340	121820	250340	215800
Q9WVA2	Q9WVA2	Mitochondrial import inner membrane translocase subunit Tim8 A	Timm8a1	sp|Q9WVA2|TIM8A_MOUSE Mitochondrial import inner membrane translocase subunit Tim8 A OS=Mus musculus GN=Timm8a1 PE=1 SV=1	2	41.2	0	167410	157070	204040	129820	173990	122760	171220	153920	134000	164830	154700	126800	259150	131610	191660	154230
Q9Z1X9	Q9Z1X9	Cell division control protein 45 homolog	Cdc45	sp|Q9Z1X9|CDC45_MOUSE Cell division control protein 45 homolog OS=Mus musculus GN=Cdc45 PE=2 SV=2	2	4.8	0	149430	125330	205460	140660	148620	219570	167220	122210	143510	136810	156020	158890	162850	222220	165540	163990
Q99M01	Q99M01	Phenylalanine--tRNA ligase, mitochondrial	Fars2	sp|Q99M01|SYFM_MOUSE Phenylalanine--tRNA ligase, mitochondrial OS=Mus musculus GN=Fars2 PE=2 SV=1	2	4.4	0	161890	128350	223750	163760	141510	179070	163640	130970	132940	112500	150340	214780	183750	179480	173040	152120
Q8C0D9	Q8C0D9	Centrosomal protein of 68 kDa	Cep68	sp|Q8C0D9|CEP68_MOUSE Centrosomal protein of 68 kDa OS=Mus musculus GN=Cep68 PE=2 SV=2	3	7	0	160380	158150	228400	158340	147000	156330	166240	136470	141900	148890	139060	144190	168770	164810	174060	181030
Q8BGR6	Q8BGR6	ADP-ribosylation factor-like protein 15	Arl15	sp|Q8BGR6|ARL15_MOUSE ADP-ribosylation factor-like protein 15 OS=Mus musculus GN=Arl15 PE=2 SV=1	2	10.3	0	204760	181250	194650	113660	158130	130890	175410	153870	164360	165850	135790	119320	189750	138900	197150	173400
P51569	P51569	Alpha-galactosidase A	Gla	sp|P51569|AGAL_MOUSE Alpha-galactosidase A OS=Mus musculus GN=Gla PE=1 SV=1	2	6.9	0	180970	173620	188670	108450	143130	111290	200610	186030	157460	170640	117920	97583	175090	171410	245650	214610
Q6IQX8	Q6IQX8		Zfp219	tr|Q6IQX8|Q6IQX8_MOUSE Protein Zfp219 OS=Mus musculus GN=Zfp219 PE=2 SV=1	2	7.3	0	174500	179890	197540	128330	166110	138410	195080	164050	163470	146130	113250	117430	197710	145850	205260	169840
Q9D2Q2	Q9D2Q2	Probable tRNA (uracil-O(2)-)-methyltransferase	Trmt44	sp|Q9D2Q2|TRM44_MOUSE Probable tRNA (uracil-O(2)-)-methyltransferase OS=Mus musculus GN=Trmt44 PE=2 SV=2	4	12.1	0	197660	170170	198340	93149	161840	145000	192780	156880	173640	144950	139950	97128	178200	158180	223180	200990
P16297	P16297	Interleukin-2 receptor subunit beta	Il2rb	sp|P16297|IL2RB_MOUSE Interleukin-2 receptor subunit beta OS=Mus musculus GN=Il2rb PE=2 SV=1	3	6.3	0	167270	141730	196190	130590	145340	163810	197020	145770	151360	134470	143150	127430	178860	163750	228170	193490
Q7TS63	Q7TS63	Zinc finger protein ZFAT	Zfat	sp|Q7TS63|ZFAT_MOUSE Zinc finger protein ZFAT OS=Mus musculus GN=Zfat PE=1 SV=2	2	3	0	205870	198440	222150	89289	165660	112500	224610	175800	165910	182140	119590	95238	191720	106880	234070	204600
Q8CHH9	Q8CHH9	Septin-8	2020-09-08	sp|Q8CHH9|SEPT8_MOUSE Septin-8 OS=Mus musculus GN=Sept8 PE=1 SV=4	7	24	0	169010	160340	199720	95661	141250	178070	213130	182220	173000	122050	119830	111890	157100	170140	237730	224520
A2AUY4	A2AUY4		Baz2b	tr|A2AUY4|A2AUY4_MOUSE Protein Baz2b OS=Mus musculus GN=Baz2b PE=4 SV=1	4	3.6	0	158070	122500	192660	235360	124740	174680	163750	139770	145520	136510	127630	192910	188920	174120	182470	166480
O54956	O54956	DNA polymerase epsilon subunit 2	Pole2	sp|O54956|DPOE2_MOUSE DNA polymerase epsilon subunit 2 OS=Mus musculus GN=Pole2 PE=2 SV=2	4	12.1	0	176670	128030	227510	145380	134430	187560	151550	153420	144530	123910	163480	156110	191390	197740	177850	160030
Q6NZB1	Q6NZB1	Protein arginine N-methyltransferase 6	Prmt6	sp|Q6NZB1|ANM6_MOUSE Protein arginine N-methyltransferase 6 OS=Mus musculus GN=Prmt6 PE=1 SV=2	3	14.6	0	209170	179900	193020	104780	151740	96427	219540	147390	185550	155480	137390	114500	174430	156350	237250	204900
G5E8F4	G5E8F4		Fpgt	tr|G5E8F4|G5E8F4_MOUSE MCG140999 OS=Mus musculus GN=Fpgt PE=4 SV=1	5	14.6	0	221770	212890	218920	86233	153630	139360	216220	170990	169680	163600	121960	91073	199150	105590	237540	201500
Q9QZQ1	Q9QZQ1	Afadin	Mllt4	sp|Q9QZQ1|AFAD_MOUSE Afadin OS=Mus musculus GN=Mllt4 PE=1 SV=3	2	1.3	0	162770	156070	211100	94190	155070	132500	223410	188680	172010	146140	142560	115070	173680	137840	237660	218470
Q9DBW0	Q9DBW0	Cytochrome P450 4V2	Cyp4v2	sp|Q9DBW0|CP4V2_MOUSE Cytochrome P450 4V2 OS=Mus musculus GN=Cyp4v2 PE=1 SV=1	2	4.4	0	148400	127260	211950	146020	131740	186350	204240	160130	139960	122340	133900	141450	174960	197600	214240	199520
P58158	P58158	Galactosylgalactosylxylosylprotein 3-beta-glucuronosyltransferase 3	B3gat3	sp|P58158|B3GA3_MOUSE Galactosylgalactosylxylosylprotein 3-beta-glucuronosyltransferase 3 OS=Mus musculus GN=B3gat3 PE=2 SV=1	3	9.3	0	169310	125410	214270	140340	126000	206480	179560	142130	134570	125980	150130	156830	196470	195900	194850	178000
P58801	P58801	Receptor-interacting serine/threonine-protein kinase 2	Ripk2	sp|P58801|RIPK2_MOUSE Receptor-interacting serine/threonine-protein kinase 2 OS=Mus musculus GN=Ripk2 PE=1 SV=1	5	10.6	0	234080	222220	219320	71095	168260	105800	243150	193920	186820	164520	109790	78589	189700	118790	229940	242430
Q9CX66	Q9CX66	Uncharacterized protein C12orf45 homolog	D10Wsu102e	sp|Q9CX66|CL045_MOUSE Uncharacterized protein C12orf45 homolog OS=Mus musculus GN=D10Wsu102e PE=2 SV=1	3	27	0	180480	190510	203750	100750	161810	114630	214700	168930	180720	160050	126030	81311	184190	121410	313090	238420
Q8CIB9	Q8CIB9	N-acetyltransferase ESCO2	Esco2	sp|Q8CIB9|ESCO2_MOUSE N-acetyltransferase ESCO2 OS=Mus musculus GN=Esco2 PE=2 SV=3	2	5.2	0	159380	155540	176800	140780	134330	187260	207470	161790	166500	113100	147670	156920	156250	192020	191220	183500
Q9CPY6	Q9CPY6	Glucose-induced degradation protein 4 homolog	Gid4	sp|Q9CPY6|GID4_MOUSE Glucose-induced degradation protein 4 homolog OS=Mus musculus GN=Gid4 PE=2 SV=1	2	11.1	0	216610	195130	228060	108480	165500	104600	204330	179750	176360	162920	122090	93834	187440	130200	228770	198580
Q3UN04	Q3UN04	Ubiquitin carboxyl-terminal hydrolase 30	Usp30	sp|Q3UN04|UBP30_MOUSE Ubiquitin carboxyl-terminal hydrolase 30 OS=Mus musculus GN=Usp30 PE=1 SV=1	1	3.7	0	163290	128510	216930	153530	125080	179330	180340	139470	152840	141140	167520	177910	174340	175120	188920	166100
P0C7T6	P0C7T6	Ataxin-1-like	Atxn1l	sp|P0C7T6|ATX1L_MOUSE Ataxin-1-like OS=Mus musculus GN=Atxn1l PE=1 SV=1	4	10.8	0	223580	188470	195760	120120	175140	122600	191200	167050	176370	159890	128370	127460	192090	124170	181090	182310
Q8R0J4	Q8R0J4	Transmembrane protein 134	Tmem134	sp|Q8R0J4|TM134_MOUSE Transmembrane protein 134 OS=Mus musculus GN=Tmem134 PE=2 SV=1	2	16.4	0	165440	146510	261420	140260	116150	180050	174280	143650	144100	141460	159610	152080	181690	189720	173330	180320
E9Q7L6	E9Q7L6		Foxn2	tr|E9Q7L6|E9Q7L6_MOUSE Protein Foxn2 OS=Mus musculus GN=Foxn2 PE=4 SV=1	3	10	0	181770	195740	199490	86597	174370	152930	208320	179950	180270	151710	131920	112540	174590	155390	211700	176250
Q9CY94	Q9CY94	DNA replication complex GINS protein PSF3	Gins3	sp|Q9CY94|PSF3_MOUSE DNA replication complex GINS protein PSF3 OS=Mus musculus GN=Gins3 PE=2 SV=1	1	6.5	0	195590	165020	240170	108320	148820	162280	202790	151930	156020	160140	135780	107110	175940	155810	220820	184280
Q9R1X5	Q9R1X5	Multidrug resistance-associated protein 5	Abcc5	sp|Q9R1X5|MRP5_MOUSE Multidrug resistance-associated protein 5 OS=Mus musculus GN=Abcc5 PE=1 SV=2	4	4	0	192790	169140	237130	119230	147950	147520	184810	164880	183770	125960	143980	131790	164740	145330	212350	188930
Q61581	Q61581	Insulin-like growth factor-binding protein 7	Igfbp7	sp|Q61581|IBP7_MOUSE Insulin-like growth factor-binding protein 7 OS=Mus musculus GN=Igfbp7 PE=2 SV=3	1	5.7	0	136250	140690	192620	150140	145880	240020	158420	152000	140610	136850	106440	155560	206270	277700	173890	182970
Q9D853	Q9D853	Protein-lysine N-methyltransferase Mettl10	Mettl10	sp|Q9D853|MET10_MOUSE Protein-lysine N-methyltransferase Mettl10 OS=Mus musculus GN=Mettl10 PE=2 SV=1	2	7.8	0	224780	214420	238340	104300	170940	89408	226090	177650	203370	185580	125840	94807	181450	104470	224450	193370
P97499	P97499	Telomerase protein component 1	Tep1	sp|P97499|TEP1_MOUSE Telomerase protein component 1 OS=Mus musculus GN=Tep1 PE=1 SV=1	4	2.4	0	168620	175400	208910	154150	155360	161870	187780	135670	173280	132180	138720	136710	151500	157200	212570	204320
Q3URQ7	Q3URQ7	Methenyltetrahydrofolate synthase domain-containing protein	Mthfsd	sp|Q3URQ7|MTHSD_MOUSE Methenyltetrahydrofolate synthase domain-containing protein OS=Mus musculus GN=Mthfsd PE=2 SV=1	3	14.2	0	220960	197060	218830	98691	157130	126530	238670	173040	174460	168970	118500	84980	193270	126270	224240	219470
P56394	P56394	Cytochrome c oxidase copper chaperone	Cox17	sp|P56394|COX17_MOUSE Cytochrome c oxidase copper chaperone OS=Mus musculus GN=Cox17 PE=3 SV=2	1	20.6	0	166690	109750	200090	146620	153340	182640	183990	153880	141960	128910	167230	153790	187410	196220	197320	189850
Q8BYJ6	Q8BYJ6	TBC1 domain family member 4	Tbc1d4	sp|Q8BYJ6|TBCD4_MOUSE TBC1 domain family member 4 OS=Mus musculus GN=Tbc1d4 PE=1 SV=2	5	4.3	0	195540	185260	234270	91589	140620	123280	210260	178720	175200	186390	140890	78083	182890	140180	266400	222990
Q9R1S3	Q9R1S3	GPI ethanolamine phosphate transferase 1	Pign	sp|Q9R1S3|PIGN_MOUSE GPI ethanolamine phosphate transferase 1 OS=Mus musculus GN=Pign PE=2 SV=2	3	3.9	0	248090	217940	218340	87111	173050	81683	231020	202860	189950	182320	126180	73449	205770	106670	271720	216320
Q9D1F4	Q9D1F4	Proline-rich AKT1 substrate 1	Akt1s1	sp|Q9D1F4|AKTS1_MOUSE Proline-rich AKT1 substrate 1 OS=Mus musculus GN=Akt1s1 PE=1 SV=1	4	20.6	0	159450	174220	242170	132770	129270	131330	217390	161020	147960	149890	127110	132910	171630	169080	238850	209370
Q9ER35	Q9ER35	Fructosamine-3-kinase	Fn3k	sp|Q9ER35|FN3K_MOUSE Fructosamine-3-kinase OS=Mus musculus GN=Fn3k PE=2 SV=1	2	9.1	0	375550	250470	227550	115280	141460	106870	206030	170990	164620	170520	107770	60347	263050	117620	203990	196440
P03899	P03899	NADH-ubiquinone oxidoreductase chain 3	Mtnd3	sp|P03899|NU3M_MOUSE NADH-ubiquinone oxidoreductase chain 3 OS=Mus musculus GN=Mtnd3 PE=3 SV=3	1	13	0	157530	149100	198350	251500	163490	161900	153560	139990	132590	132070	170120	189660	191500	172530	177620	143550
Q8BH02	Q8BH02	Torsin-4A	Tor4a	sp|Q8BH02|TOR4A_MOUSE Torsin-4A OS=Mus musculus GN=Tor4a PE=2 SV=1	3	12	0	146180	131530	226430	172320	136220	236490	184830	139270	126210	115030	147270	176190	158820	261320	194330	175600
P16879	P16879	Tyrosine-protein kinase Fes/Fps	Fes	sp|P16879|FES_MOUSE Tyrosine-protein kinase Fes/Fps OS=Mus musculus GN=Fes PE=1 SV=2	3	4.9	0	156080	154410	206790	114300	131270	172480	222810	176420	154530	135330	148110	123870	175840	189070	231050	230180
P63024;Q62442	P63024	Vesicle-associated membrane protein 3	Vamp3	sp|P63024|VAMP3_MOUSE Vesicle-associated membrane protein 3 OS=Mus musculus GN=Vamp3 PE=1 SV=1	5	45.6	0	179230	195360	199830	137050	128540	149160	192670	166920	167570	165770	143400	113890	191540	170820	193960	203380
P12960	P12960	Contactin-1	Cntn1	sp|P12960|CNTN1_MOUSE Contactin-1 OS=Mus musculus GN=Cntn1 PE=1 SV=1	3	2.5	0	167370	144320	231440	155380	196500	211570	134880	122780	177790	188010	188010	120290	213510	141040	160840	161280
Q9JHJ3	Q9JHJ3	Glycosylated lysosomal membrane protein	Glmp	sp|Q9JHJ3|GLMP_MOUSE Glycosylated lysosomal membrane protein OS=Mus musculus GN=Glmp PE=1 SV=1	2	9.9	0	160470	176930	211890	135180	154560	159550	187190	174660	174000	119110	131460	134470	187040	155590	245970	205620
Q6R3M4	Q6R3M4	DNA polymerase iota	Poli	sp|Q6R3M4|POLI_MOUSE DNA polymerase iota OS=Mus musculus GN=Poli PE=1 SV=1	3	4.6	0	202220	194600	233050	115380	143260	143210	210410	181090	172890	155660	138820	92813	189700	142630	237790	191950
Q6XUX1	Q6XUX1	Dual serine/threonine and tyrosine protein kinase	Dstyk	sp|Q6XUX1|DUSTY_MOUSE Dual serine/threonine and tyrosine protein kinase OS=Mus musculus GN=Dstyk PE=1 SV=1	2	2.6	0	181640	169800	226330	116980	162350	134930	196630	152380	179260	173670	154500	135100	195020	142500	212860	173470
P97290	P97290	Plasma protease C1 inhibitor	Serping1	sp|P97290|IC1_MOUSE Plasma protease C1 inhibitor OS=Mus musculus GN=Serping1 PE=1 SV=3	2	4.6	0	123150	117090	186500	218440	148530	343970	148360	123650	113610	107480	141720	225340	161910	368620	173810	165160
Q99N09	Q99N09	Membrane-spanning 4-domains subfamily A member 6B	Ms4a6b	sp|Q99N09|M4A6B_MOUSE Membrane-spanning 4-domains subfamily A member 6B OS=Mus musculus GN=Ms4a6b PE=2 SV=1	1	5.3	0	193830	184610	242050	148830	158390	158080	185630	141180	170000	154940	146470	142410	157580	127880	220260	181800
Q8C145	Q8C145	Zinc transporter ZIP6	Slc39a6	sp|Q8C145|S39A6_MOUSE Zinc transporter ZIP6 OS=Mus musculus GN=Slc39a6 PE=1 SV=1	1	1.3	0	190010	182450	216250	117430	172720	114350	195420	170150	176740	170340	155020	124950	179780	152810	233980	178950
E9Q3P4	E9Q3P4		Cenpf	tr|E9Q3P4|E9Q3P4_MOUSE Protein Cenpf OS=Mus musculus GN=Cenpf PE=4 SV=1	3	1.1	0	140100	186210	180570	147170	126810	202990	187050	151050	213020	251330	173340	141700	160080	138480	186350	145120
Q99P58	Q99P58	Ras-related protein Rab-27B	Rab27b	sp|Q99P58|RB27B_MOUSE Ras-related protein Rab-27B OS=Mus musculus GN=Rab27b PE=1 SV=3	4	23.4	0	235750	171240	209380	157770	120960	164800	186290	137930	255550	127980	154600	161960	164760	146600	182740	166000
Q9QXQ1	Q9QXQ1	cAMP-specific 3,5-cyclic phosphodiesterase 7B	Pde7b	sp|Q9QXQ1|PDE7B_MOUSE cAMP-specific 3,5-cyclic phosphodiesterase 7B OS=Mus musculus GN=Pde7b PE=2 SV=1	1	2	0	182040	205360	139290	77061	227380	149650	296530	299020	306830	112610	143100	130090	160610	124130	167340	158900
Q00993	Q00993	Tyrosine-protein kinase receptor UFO	Axl	sp|Q00993|UFO_MOUSE Tyrosine-protein kinase receptor UFO OS=Mus musculus GN=Axl PE=1 SV=2	6	13.2	0	132980	127040	206800	147130	150010	230410	205510	168250	134720	99407	157610	150570	183640	236480	234020	212850
Q3US17	Q3US17	Zinc finger protein 48	Znf48	sp|Q3US17|ZNF48_MOUSE Zinc finger protein 48 OS=Mus musculus GN=Znf48 PE=1 SV=2	2	4.4	0	194650	163750	229350	114470	168170	128200	211760	168660	164860	156500	145910	136510	194110	152970	219290	198360
P59438	P59438	Hermansky-Pudlak syndrome 5 protein homolog	Hps5	sp|P59438|HPS5_MOUSE Hermansky-Pudlak syndrome 5 protein homolog OS=Mus musculus GN=Hps5 PE=1 SV=2	3	3.5	0	188200	170930	210140	101500	191940	138730	201140	168430	188180	176410	129400	126890	187510	154530	221950	202560
Q6NZP2	Q6NZP2	Vasculin-like protein 1	Gpbp1l1	sp|Q6NZP2|GPBL1_MOUSE Vasculin-like protein 1 OS=Mus musculus GN=Gpbp1l1 PE=1 SV=1	2	7.6	0	207010	187810	229420	107390	176220	140510	199970	177100	178730	166010	133170	94567	189130	135730	259750	214030
Q9R123	Q9R123	N-acetyltransferase 6	Nat6	sp|Q9R123|NAT6_MOUSE N-acetyltransferase 6 OS=Mus musculus GN=Nat6 PE=2 SV=1	2	14.6	0	225080	197320	256560	108660	171370	119990	244980	174880	181310	166470	111890	105950	203060	124780	223570	203290
Q8VBX4	Q8VBX4	C-type lectin domain family 4 member K	Cd207	sp|Q8VBX4|CLC4K_MOUSE C-type lectin domain family 4 member K OS=Mus musculus GN=Cd207 PE=2 SV=1	3	12.4	0	125440	155180	224660	183310	150650	223790	204100	162790	141170	96157	131130	163150	166890	204830	230970	218820
P54797	P54797	Transport and Golgi organization 2 homolog	Tango2	sp|P54797|TNG2_MOUSE Transport and Golgi organization 2 homolog OS=Mus musculus GN=Tango2 PE=2 SV=1	4	27.9	0	202260	192340	248880	122490	143190	161580	190630	170410	165300	158370	144430	125520	186960	147220	206590	192950
Q4VBF2	Q4VBF2	R3H domain-containing protein 4	R3hdm4	sp|Q4VBF2|R3HD4_MOUSE R3H domain-containing protein 4 OS=Mus musculus GN=R3hdm4 PE=2 SV=1	1	3.4	0	203460	175700	231940	123450	160510	142670	171200	170460	189450	174990	151120	132300	183020	171310	195470	168520
Q8C006	Q8C006	Tripartite motif-containing protein 35	Trim35	sp|Q8C006|TRI35_MOUSE Tripartite motif-containing protein 35 OS=Mus musculus GN=Trim35 PE=2 SV=2	1	3	0	195490	198350	225950	121910	143210	113780	222630	162850	153450	176350	130400	144650	208570	155620	229530	197230
Q9DBG9	Q9DBG9	Tax1-binding protein 3	Tax1bp3	sp|Q9DBG9|TX1B3_MOUSE Tax1-binding protein 3 OS=Mus musculus GN=Tax1bp3 PE=1 SV=1	3	31.5	0	194100	173320	221080	119290	151090	140010	194480	166770	203210	147000	138760	127420	181870	167140	234210	214290
Q8K3M5	Q8K3M5	CDK5 and ABL1 enzyme substrate 2	Cables2	sp|Q8K3M5|CABL2_MOUSE CDK5 and ABL1 enzyme substrate 2 OS=Mus musculus GN=Cables2 PE=1 SV=2	2	9.2	0	211940	207960	219590	96740	157080	126630	237220	187530	191440	181350	121820	96087	220860	132150	227740	220430
O54724	O54724	Polymerase I and transcript release factor	Ptrf	sp|O54724|PTRF_MOUSE Polymerase I and transcript release factor OS=Mus musculus GN=Ptrf PE=1 SV=1	5	18.6	0	153210	148600	202950	161750	150090	233730	221060	195630	172820	107870	167590	167590	140980	203720	184090	162020
Q9CR20	Q9CR20	Immediate early response 3-interacting protein 1	Ier3ip1	sp|Q9CR20|IR3IP_MOUSE Immediate early response 3-interacting protein 1 OS=Mus musculus GN=Ier3ip1 PE=2 SV=1	1	24.4	0	181480	163090	247750	149260	167430	147970	172120	161090	179080	211020	147520	147420	147460	136940	213100	193250
Q8C9S8	Q8C9S8	Cysteine protease ATG4A	Atg4a	sp|Q8C9S8|ATG4A_MOUSE Cysteine protease ATG4A OS=Mus musculus GN=Atg4a PE=2 SV=2	3	12.6	0	229000	211610	233940	98226	163400	119830	224780	190610	180780	193440	129360	100240	208850	127620	225360	203600
P13609	P13609	Serglycin	Srgn	sp|P13609|SRGN_MOUSE Serglycin OS=Mus musculus GN=Srgn PE=1 SV=1	3	36.8	0	159580	168920	229970	128110	169310	136630	200120	187850	198520	150470	169740	123150	155300	149290	258580	203660
Q9D4G9	Q9D4G9	RecQ-mediated genome instability protein 1	Rmi1	sp|Q9D4G9|RMI1_MOUSE RecQ-mediated genome instability protein 1 OS=Mus musculus GN=Rmi1 PE=2 SV=1	1	2.8	0	211310	211610	197840	107180	174510	145350	221040	153800	191670	171750	121000	109640	209960	147130	225890	213930
O88561	O88561	Long-chain fatty acid transport protein 3	Slc27a3	sp|O88561|S27A3_MOUSE Long-chain fatty acid transport protein 3 OS=Mus musculus GN=Slc27a3 PE=1 SV=2	2	3.6	0	181530	143060	210030	147360	162910	183860	217230	163050	149390	157860	123020	144660	185770	193400	217550	192930
Q3UG98	Q3UG98	N-acetyltransferase 9	Nat9	sp|Q3UG98|NAT9_MOUSE N-acetyltransferase 9 OS=Mus musculus GN=Nat9 PE=1 SV=2	2	9.1	0	200510	189320	216250	127940	163990	122250	218810	185210	186260	150320	142850	139470	181680	146570	212750	200240
Q9ERR1	Q9ERR1	Nuclear distribution protein nudE-like 1	Ndel1	sp|Q9ERR1|NDEL1_MOUSE Nuclear distribution protein nudE-like 1 OS=Mus musculus GN=Ndel1 PE=1 SV=2	4	13.3	0	223260	203520	249180	113160	160600	117690	230520	190630	184670	183030	134900	101410	198990	124840	242800	185210
Q99J23	Q99J23	GH3 domain-containing protein	Ghdc	sp|Q99J23|GHDC_MOUSE GH3 domain-containing protein OS=Mus musculus GN=Ghdc PE=2 SV=2	3	8.8	0	136820	144060	229050	179860	152280	215870	184940	156150	139970	112660	180120	177910	184220	220150	198440	177080
Q3V0K9	Q3V0K9	Plastin-1	Pls1	sp|Q3V0K9|PLSI_MOUSE Plastin-1 OS=Mus musculus GN=Pls1 PE=2 SV=1	6	13.2	0	223980	186920	196270	100740	178560	143370	235230	170760	229360	129660	133470	94922	174820	168160	255270	232090
Q7TQE6	Q7TQE6	Macoilin	Tmem57	sp|Q7TQE6|MACOI_MOUSE Macoilin OS=Mus musculus GN=Tmem57 PE=1 SV=1	5	8.4	0	191080	187800	235520	105470	151130	146920	226950	167160	201150	152010	149790	123310	199030	172710	212350	184340
Q61500	Q61500	Integral membrane protein 2A	Itm2a	sp|Q61500|ITM2A_MOUSE Integral membrane protein 2A OS=Mus musculus GN=Itm2a PE=2 SV=2	3	12.2	0	275630	262100	261410	121310	170140	83421	214490	171450	229620	203110	128370	113930	222670	95177	202320	166230
O54836	O54836	Zinc finger matrin-type protein 3	Zmat3	sp|O54836|ZMAT3_MOUSE Zinc finger matrin-type protein 3 OS=Mus musculus GN=Zmat3 PE=2 SV=1	3	15.2	0	215420	244300	231240	96593	197150	124720	227550	172300	188580	187310	126740	95884	209530	117710	249030	198800
Q8BPE4	Q8BPE4	Transmembrane protein 177	Tmem177	sp|Q8BPE4|TM177_MOUSE Transmembrane protein 177 OS=Mus musculus GN=Tmem177 PE=2 SV=1	2	9.3	0	182010	158540	242810	149040	144030	160130	186900	144780	151700	156170	175670	169660	173980	174910	226000	188390
P54830	P54830	Tyrosine-protein phosphatase non-receptor type 5	Ptpn5	sp|P54830|PTN5_MOUSE Tyrosine-protein phosphatase non-receptor type 5 OS=Mus musculus GN=Ptpn5 PE=2 SV=2	2	5.2	0	156460	170240	259450	115450	183660	147230	198340	186610	167530	154650	162990	124230	193500	138660	233660	227320
A0A0B4J1P4	A0A0B4J1P4		Ighv5-16	tr|A0A0B4J1P4|A0A0B4J1P4_MOUSE Protein Ighv5-16 (Fragment) OS=Mus musculus GN=Ighv5-16 PE=4 SV=1	1	13.7	0	222210	162020	193860	128080	162520	174480	217180	188670	205400	144560	126150	111500	164970	184440	212580	213140
Q9CQP3	Q9CQP3	Coiled-coil-helix-coiled-coil-helix domain-containing protein 5	Chchd5	sp|Q9CQP3|CHCH5_MOUSE Coiled-coil-helix-coiled-coil-helix domain-containing protein 5 OS=Mus musculus GN=Chchd5 PE=3 SV=1	1	10.9	0	215190	166690	233970	143710	169870	149100	189600	167160	164350	146690	137820	131010	221280	144630	220060	203630
P28481	P28481	Collagen alpha-1(II) chain;Collagen alpha-1(II) chain;Chondrocalcin	Col2a1	sp|P28481|CO2A1_MOUSE Collagen alpha-1(II) chain OS=Mus musculus GN=Col2a1 PE=1 SV=2	2	1.6	0	144370	134300	250080	205610	187780	226310	132410	131770	186970	171610	193890	134840	185510	177020	176990	177190
E9Q8I9	E9Q8I9	Protein furry homolog	Fry	sp|E9Q8I9|FRY_MOUSE Protein furry homolog OS=Mus musculus GN=Fry PE=1 SV=1	5	3.4	0	180750	173870	233540	140340	193430	159570	205660	143190	212160	181100	140400	112400	192520	150820	207250	188410
E9Q2S7	E9Q2S7		Zfp266	tr|E9Q2S7|E9Q2S7_MOUSE Protein Zfp266 OS=Mus musculus GN=Zfp266 PE=4 SV=1	1	2.6	0	197470	150670	172800	142890	181020	163480	207520	185400	221050	154290	157230	137580	231940	158860	155350	182590
Q99P65	Q99P65	Equilibrative nucleoside transporter 3	Slc29a3	sp|Q99P65|S29A3_MOUSE Equilibrative nucleoside transporter 3 OS=Mus musculus GN=Slc29a3 PE=1 SV=1	4	13.5	0	151830	146940	201500	177040	168110	224800	167280	149520	137330	110080	142500	220440	183380	218000	220000	207760
Q6PAL8	Q6PAL8	DENN domain-containing protein 5A	Dennd5a	sp|Q6PAL8|DEN5A_MOUSE DENN domain-containing protein 5A OS=Mus musculus GN=Dennd5a PE=1 SV=1	3	4.4	0	223880	185660	216900	107540	155380	157480	238130	203780	201480	156060	113170	97848	200020	164680	234530	216650
Q3KNM2	Q3KNM2	E3 ubiquitin-protein ligase MARCH5	2020-03-05	sp|Q3KNM2|MARH5_MOUSE E3 ubiquitin-protein ligase MARCH5 OS=Mus musculus GN=March5 PE=2 SV=1	2	9.4	0	183980	154340	221700	176760	135910	181970	198660	145030	152980	150420	190520	183530	194600	175710	196060	158880
Q5NCX5	Q5NCX5	Neuralized-like protein 4	Neurl4	sp|Q5NCX5|NEUL4_MOUSE Neuralized-like protein 4 OS=Mus musculus GN=Neurl4 PE=2 SV=1	2	1.9	0	208990	165620	234260	148350	162400	166980	207710	148270	180160	173140	123130	139380	193220	171970	215340	176650
Q91WL8	Q91WL8	WW domain-containing oxidoreductase	Wwox	sp|Q91WL8|WWOX_MOUSE WW domain-containing oxidoreductase OS=Mus musculus GN=Wwox PE=1 SV=1	3	9.9	0	173140	183540	258490	150990	185970	172820	161750	157820	213210	150680	149120	132080	185510	161980	213690	165270
P0CB42	P0CB42	Alkylated DNA repair protein alkB homolog 1	Alkbh1	sp|P0CB42|ALKB1_MOUSE Alkylated DNA repair protein alkB homolog 1 OS=Mus musculus GN=Alkbh1 PE=1 SV=1	2	6.7	0	179810	177860	240790	140090	154130	142190	216690	164860	174210	185310	160570	145460	174310	146360	215880	199310
Q8VDU5	Q8VDU5	SNF-related serine/threonine-protein kinase	Snrk	sp|Q8VDU5|SNRK_MOUSE SNF-related serine/threonine-protein kinase OS=Mus musculus GN=Snrk PE=2 SV=1	3	6.3	0	214800	215940	230660	82189	180290	117080	247120	204890	223000	186710	123180	87006	207540	129110	260110	241020
P23953	P23953	Carboxylesterase 1C	Ces1c	sp|P23953|EST1C_MOUSE Carboxylesterase 1C OS=Mus musculus GN=Ces1c PE=1 SV=4	2	4	0	118930	115170	337790	169160	143130	291920	168690	137220	122910	95191	294090	199920	162860	265610	179540	174640
Q8BZY3	Q8BZY3		Ddx19b	tr|Q8BZY3|Q8BZY3_MOUSE Protein Ddx19b OS=Mus musculus GN=Ddx19b PE=2 SV=1	21	47	0	241540	202370	242320	89400	176000	114830	239170	181120	190130	205900	128860	85691	239460	126400	253220	230690
Q8BWR4	Q8BWR4	Ubiquitin carboxyl-terminal hydrolase 40	Usp40	sp|Q8BWR4|UBP40_MOUSE Ubiquitin carboxyl-terminal hydrolase 40 OS=Mus musculus GN=Usp40 PE=1 SV=2	4	4.9	0	203630	190370	229460	107980	154020	152520	217660	168700	211940	156820	124040	127190	195020	144100	250920	233000
P58749	P58749	Transmembrane 6 superfamily member 1	Tm6sf1	sp|P58749|TM6S1_MOUSE Transmembrane 6 superfamily member 1 OS=Mus musculus GN=Tm6sf1 PE=2 SV=2	2	4.9	0	157070	141700	228560	205310	140430	199780	179080	148010	117320	125980	168980	227000	187000	216770	214490	187580
Q3U3D7	Q3U3D7	Transmembrane protein 131-like	Kiaa0922	sp|Q3U3D7|T131L_MOUSE Transmembrane protein 131-like OS=Mus musculus GN=Kiaa0922 PE=2 SV=1	5	3.2	0	155820	196260	219170	171220	156150	188570	200840	157780	164580	131980	151490	174550	170220	178890	192860	200050
Q6NVF0	Q6NVF0	Inositol polyphosphate 5-phosphatase OCRL-1	Ocrl	sp|Q6NVF0|OCRL_MOUSE Inositol polyphosphate 5-phosphatase OCRL-1 OS=Mus musculus GN=Ocrl PE=1 SV=1	7	10	0	214520	196200	232670	105100	175380	138510	236810	185550	192450	165570	123470	114390	187480	152300	233250	219900
Q60992;REV__Q6NZL0	Q60992	Guanine nucleotide exchange factor VAV2	Vav2	sp|Q60992|VAV2_MOUSE Guanine nucleotide exchange factor VAV2 OS=Mus musculus GN=Vav2 PE=1 SV=1	6	7.4	0	181970	214770	224830	104350	195600	129840	220370	193010	179640	175410	144520	117250	191100	139690	243100	212490
Q3UGS4	Q3UGS4	Protein FAM195B	Fam195b	sp|Q3UGS4|F195B_MOUSE Protein FAM195B OS=Mus musculus GN=Fam195b PE=1 SV=1	3	36.1	0	260410	210870	206260	82740	189510	105460	236020	194370	209110	230960	112750	99431	235980	125000	258700	210620
Q9QZI8	Q9QZI8	Serine incorporator 1	Serinc1	sp|Q9QZI8|SERC1_MOUSE Serine incorporator 1 OS=Mus musculus GN=Serinc1 PE=1 SV=1	4	10.6	0	180710	178070	212200	141620	153270	167480	210880	162810	162920	167370	166520	127660	171720	199570	221140	203690
P07310	P07310	Creatine kinase M-type	Ckm	sp|P07310|KCRM_MOUSE Creatine kinase M-type OS=Mus musculus GN=Ckm PE=1 SV=1	2	7.1	0	279180	223220	201890	96110	182270	98409	227000	181180	182820	237790	133700	85169	208530	123830	279700	239980
O35621	O35621	Phosphomannomutase 1	Pmm1	sp|O35621|PMM1_MOUSE Phosphomannomutase 1 OS=Mus musculus GN=Pmm1 PE=1 SV=1	3	13.7	0	248510	216640	252970	97652	172170	98051	225190	192720	204720	182300	137380	87421	207370	141020	258560	234970
Q8BG73	Q8BG73	SH3 domain-binding glutamic acid-rich-like protein 2	Sh3bgrl2	sp|Q8BG73|SH3L2_MOUSE SH3 domain-binding glutamic acid-rich-like protein 2 OS=Mus musculus GN=Sh3bgrl2 PE=1 SV=1	1	11.2	0	232320	179480	242590	110510	169490	147960	194340	171260	190880	179170	149330	142160	200090	143080	221170	181810
C3VPR6	C3VPR6	Protein NLRC5	Nlrc5	sp|C3VPR6|NLRC5_MOUSE Protein NLRC5 OS=Mus musculus GN=Nlrc5 PE=1 SV=2	5	4.9	0	206730	197690	215090	120970	164090	145000	223120	180010	198190	159320	132850	121250	205010	158210	226060	208420
P42682	P42682	Tyrosine-protein kinase TXK	Txk	sp|P42682|TXK_MOUSE Tyrosine-protein kinase TXK OS=Mus musculus GN=Txk PE=1 SV=1	3	8.5	0	214780	200530	225450	132150	182590	148540	205020	147890	194820	181130	130410	117570	197850	152400	227800	202720
Q9CZG9	Q9CZG9	PDZ domain-containing protein 11	Pdzd11	sp|Q9CZG9|PDZ11_MOUSE PDZ domain-containing protein 11 OS=Mus musculus GN=Pdzd11 PE=1 SV=1	3	35.7	0	232740	201430	240000	115400	161700	114130	242190	216000	201870	180690	133650	107910	204590	120330	242060	203350
Q9D4C5	Q9D4C5	ELL-associated factor 1	Eaf1	sp|Q9D4C5|EAF1_MOUSE ELL-associated factor 1 OS=Mus musculus GN=Eaf1 PE=2 SV=2	3	12.7	0	214820	173380	222370	126880	159170	137140	217740	168430	176870	160040	140560	128100	206810	166430	249310	219710
Q9R1A8	Q9R1A8	E3 ubiquitin-protein ligase RFWD2	Rfwd2	sp|Q9R1A8|RFWD2_MOUSE E3 ubiquitin-protein ligase RFWD2 OS=Mus musculus GN=Rfwd2 PE=1 SV=2	2	3.7	0	152500	148300	256210	182490	148100	191620	192490	131080	153810	148580	176230	191760	178170	200960	217390	181390
Q8BS95	Q8BS95	Golgi pH regulator	Gpr89a	sp|Q8BS95|GPHR_MOUSE Golgi pH regulator OS=Mus musculus GN=Gpr89a PE=2 SV=2	2	6.2	0	160120	158680	235290	130720	158030	175080	186210	172550	173420	145110	172550	152620	181960	206060	244170	204030
Q9Z222	Q9Z222	N-acetyllactosaminide beta-1,3-N-acetylglucosaminyltransferase 2	B3GNT2	sp|Q9Z222|B3GN2_MOUSE N-acetyllactosaminide beta-1,3-N-acetylglucosaminyltransferase 2 OS=Mus musculus GN=B3GNT2 PE=1 SV=3	2	7.6	0	183980	181030	217860	112090	164810	170860	201750	160440	170840	165050	168730	160640	193650	169230	221280	212190
Q8BQX5	Q8BQX5	Transmembrane and coiled-coil domain-containing protein 6	Tmco6	sp|Q8BQX5|TMCO6_MOUSE Transmembrane and coiled-coil domain-containing protein 6 OS=Mus musculus GN=Tmco6 PE=2 SV=2	2	4	0	227860	216630	234060	98356	159940	142520	225530	179730	209320	178670	134090	125840	215090	146370	217960	199200
Q62276	Q62276	Mediator of RNA polymerase II transcription subunit 22	Med22	sp|Q62276|MED22_MOUSE Mediator of RNA polymerase II transcription subunit 22 OS=Mus musculus GN=Med22 PE=2 SV=2	3	21.5	0	206430	180120	234720	124180	189150	133450	208570	171860	148530	181830	139120	132100	242550	157760	235320	210960
A3KGS3	A3KGS3	Ral GTPase-activating protein subunit alpha-2	Ralgapa2	sp|A3KGS3|RGPA2_MOUSE Ral GTPase-activating protein subunit alpha-2 OS=Mus musculus GN=Ralgapa2 PE=1 SV=2	4	3.3	0	207870	202780	239530	123640	161990	125300	214430	193280	191150	190120	140870	125100	197240	133890	234160	223830
Q505F1	Q505F1	Nuclear receptor subfamily 2 group C member 1	Nr2c1	sp|Q505F1|NR2C1_MOUSE Nuclear receptor subfamily 2 group C member 1 OS=Mus musculus GN=Nr2c1 PE=1 SV=3	3	5.1	0	185150	189290	238180	127950	182510	152310	199390	189240	187580	146250	145400	133610	226030	179460	212830	188460
B2RVB9	B2RVB9		Tmem243	tr|B2RVB9|B2RVB9_MOUSE MCG1490, isoform CRA_b OS=Mus musculus GN=Tmem243 PE=2 SV=1	1	16.1	0	185260	167740	261210	164240	147210	233510	170170	154730	140060	186530	176610	158590	193720	169420	190730	176670
Q9Z179	Q9Z179	SHC SH2 domain-binding protein 1	Shcbp1	sp|Q9Z179|SHCBP_MOUSE SHC SH2 domain-binding protein 1 OS=Mus musculus GN=Shcbp1 PE=1 SV=1	1	1.6	0	199500	187350	226870	131350	161580	147510	219290	165610	185190	177730	146490	131680	210020	178110	240200	178990
Q68FD7	Q68FD7	Folliculin-interacting protein 1	Fnip1	sp|Q68FD7|FNIP1_MOUSE Folliculin-interacting protein 1 OS=Mus musculus GN=Fnip1 PE=1 SV=1	2	3.4	0	246090	220340	228930	96924	175070	132920	218640	173240	205200	223800	111700	114940	221550	141720	247710	208860
Q71FD5	Q71FD5	E3 ubiquitin-protein ligase ZNRF2	Znrf2	sp|Q71FD5|ZNRF2_MOUSE E3 ubiquitin-protein ligase ZNRF2 OS=Mus musculus GN=Znrf2 PE=1 SV=1	2	18.1	0	256840	202240	230420	92179	182710	153340	228240	195750	185270	185920	109680	103260	210350	144760	269290	236850
Q149L6	Q149L6	DnaJ homolog subfamily B member 14	Dnajb14	sp|Q149L6|DJB14_MOUSE DnaJ homolog subfamily B member 14 OS=Mus musculus GN=Dnajb14 PE=2 SV=1	1	2.9	0	171590	139740	207460	167460	142880	200650	214260	174870	148930	133290	163820	196560	201480	203580	226060	201220
J3QPC3	J3QPC3		BC024978	tr|J3QPC3|J3QPC3_MOUSE Protein BC024978 OS=Mus musculus GN=BC024978 PE=4 SV=1	4	19.1	0	264290	206600	230410	91675	209870	124710	244030	189040	215230	189520	149440	73336	217610	137590	266030	215460
Q9Z1S5	Q9Z1S5	Neuronal-specific septin-3	2020-09-03	sp|Q9Z1S5|SEPT3_MOUSE Neuronal-specific septin-3 OS=Mus musculus GN=Sept3 PE=1 SV=2	1	2.3	0	252710	248120	234320	85830	171800	87450	258200	233010	216440	225550	122080	101850	221310	109720	280260	235820
Q8BZZ3	Q8BZZ3	NEDD4-like E3 ubiquitin-protein ligase WWP1	Wwp1	sp|Q8BZZ3|WWP1_MOUSE NEDD4-like E3 ubiquitin-protein ligase WWP1 OS=Mus musculus GN=Wwp1 PE=1 SV=2	3	3.4	0	210250	173210	213940	135530	161830	184670	183700	163720	246850	160990	178010	129600	188040	166970	213160	198430
Q9CZA6	Q9CZA6	Nuclear distribution protein nudE homolog 1	Nde1	sp|Q9CZA6|NDE1_MOUSE Nuclear distribution protein nudE homolog 1 OS=Mus musculus GN=Nde1 PE=1 SV=1	3	11.6	0	225800	192740	233230	120530	148800	157900	236430	191280	181410	161680	128790	125310	198590	171420	245240	235290
Q8C5N5	Q8C5N5	Programmed cell death protein 2-like	Pdcd2l	sp|Q8C5N5|PDD2L_MOUSE Programmed cell death protein 2-like OS=Mus musculus GN=Pdcd2l PE=2 SV=1	3	19	0	253850	198930	259460	113980	181030	127830	250380	202100	194140	171380	127280	105040	209370	120350	258420	240000
Q5SSH8	Q5SSH8	Neuferricin	Cyb5d2	sp|Q5SSH8|NEUFC_MOUSE Neuferricin OS=Mus musculus GN=Cyb5d2 PE=1 SV=1	2	9.9	0	167870	183850	231380	172150	176810	165430	195800	167030	171960	143630	164030	166400	201890	175000	220770	197610
P97329	P97329	Kinesin-like protein KIF20A	Kif20a	sp|P97329|KI20A_MOUSE Kinesin-like protein KIF20A OS=Mus musculus GN=Kif20a PE=2 SV=1	5	6.3	0	158230	142230	245360	176190	165620	201210	185080	171190	177510	144350	156200	188350	190200	236360	200980	176350
Q99N57	Q99N57	RAF proto-oncogene serine/threonine-protein kinase	Raf1	sp|Q99N57|RAF1_MOUSE RAF proto-oncogene serine/threonine-protein kinase OS=Mus musculus GN=Raf1 PE=1 SV=2	8	16.2	0	217260	186910	240810	122750	178650	122570	230380	203100	187960	150690	151060	144640	204600	160930	238710	213650
Q8CJ19	Q8CJ19	Protein-methionine sulfoxide oxidase MICAL3	Mical3	sp|Q8CJ19|MICA3_MOUSE Protein-methionine sulfoxide oxidase MICAL3 OS=Mus musculus GN=Mical3 PE=2 SV=2	5	3	0	204750	208580	238720	94476	177520	158200	258250	198880	172860	183500	145340	124380	196620	146090	252200	223360
Q62266	Q62266	Cornifin-A	Sprr1a	sp|Q62266|SPR1A_MOUSE Cornifin-A OS=Mus musculus GN=Sprr1a PE=2 SV=1	1	16.7	0	164920	78071	157660	125950	123100	381470	215160	121390	296110	395300	171060	167050	128130	221380	250230	176590
Q5BL07	Q5BL07	Peroxisome biogenesis factor 1	Pex1	sp|Q5BL07|PEX1_MOUSE Peroxisome biogenesis factor 1 OS=Mus musculus GN=Pex1 PE=1 SV=2	5	5.8	0	208780	161800	235850	146440	157770	201080	205890	164620	165220	160820	155810	167970	201080	170440	212640	209750
Q2HXL6	Q2HXL6	ER degradation-enhancing alpha-mannosidase-like protein 3	Edem3	sp|Q2HXL6|EDEM3_MOUSE ER degradation-enhancing alpha-mannosidase-like protein 3 OS=Mus musculus GN=Edem3 PE=1 SV=2	6	10.1	0	179870	165810	230490	137580	166480	191480	226670	166980	179150	163360	157150	151590	198270	188710	237750	201200
Q8K2R5	Q8K2R5	Zinc finger protein 668	Znf668	sp|Q8K2R5|ZN668_MOUSE Zinc finger protein 668 OS=Mus musculus GN=Znf668 PE=2 SV=1	2	5.7	0	230770	201080	253700	143070	177020	126000	219210	168290	201270	178200	150620	133870	199360	151240	232100	204200
P0CW02	P0CW02	Lymphocyte antigen 6C1	Ly6c1	sp|P0CW02|LY6C1_MOUSE Lymphocyte antigen 6C1 OS=Mus musculus GN=Ly6c1 PE=2 SV=1	3	29	0	232230	186320	206640	100570	167090	146760	278200	248880	177250	172450	129850	122660	229050	144120	249360	240870
Q9CQF8	Q9CQF8	Ribosomal protein 63, mitochondrial	Mrpl57	sp|Q9CQF8|RT63_MOUSE Ribosomal protein 63, mitochondrial OS=Mus musculus GN=Mrpl57 PE=2 SV=1	3	27.5	0	184070	148640	224030	198780	182490	198340	188360	177120	173020	132360	196650	193390	200110	181200	182720	175020
Q61420	Q61420	CMP-sialic acid transporter	Slc35a1	sp|Q61420|S35A1_MOUSE CMP-sialic acid transporter OS=Mus musculus GN=Slc35a1 PE=1 SV=2	1	3.6	0	183260	175760	285150	136070	168970	148030	211680	171990	159260	152010	223610	159960	211730	179540	209840	189150
Q9Z1T5	Q9Z1T5	Deformed epidermal autoregulatory factor 1 homolog	Deaf1	sp|Q9Z1T5|DEAF1_MOUSE Deformed epidermal autoregulatory factor 1 homolog OS=Mus musculus GN=Deaf1 PE=1 SV=1	6	20.5	0	228080	198530	261290	108140	182030	153260	210520	190760	186040	188760	164710	126650	211600	151240	228040	196290
Q8BFQ3	Q8BFQ3	Ovarian cancer G-protein coupled receptor 1	Gpr68	sp|Q8BFQ3|OGR1_MOUSE Ovarian cancer G-protein coupled receptor 1 OS=Mus musculus GN=Gpr68 PE=2 SV=1	1	3.6	0	224630	203740	241070	126360	183630	123540	241590	169330	186570	164110	153820	123680	229380	170250	228280	226070
Q9ERI5	Q9ERI5	Bifunctional arginine demethylase and lysyl-hydroxylase JMJD6	Jmjd6	sp|Q9ERI5|JMJD6_MOUSE Bifunctional arginine demethylase and lysyl-hydroxylase JMJD6 OS=Mus musculus GN=Jmjd6 PE=1 SV=2	2	6	0	213630	224540	227550	127980	170720	128380	219210	191890	178110	195260	148380	118090	196880	169900	252900	229630
Q8BH60	Q8BH60	Golgi-associated PDZ and coiled-coil motif-containing protein	Gopc	sp|Q8BH60|GOPC_MOUSE Golgi-associated PDZ and coiled-coil motif-containing protein OS=Mus musculus GN=Gopc PE=1 SV=1	2	4.3	0	229430	230050	204330	93352	206690	141410	279750	235660	214130	143560	126470	98645	226590	175610	239570	220910
O35235	O35235	Tumor necrosis factor ligand superfamily member 11;Tumor necrosis factor ligand superfamily member 11, membrane form;Tumor necrosis factor ligand superfamily member 11, soluble form	Tnfsf11	sp|O35235|TNF11_MOUSE Tumor necrosis factor ligand superfamily member 11 OS=Mus musculus GN=Tnfsf11 PE=1 SV=2	2	7.6	0	215780	203660	219850	114010	191160	131950	255360	220230	218070	168540	134260	127610	184690	133630	282490	229230
P97304	P97304	DNA-directed RNA polymerases I and III subunit RPAC2	Polr1d	sp|P97304|RPAC2_MOUSE DNA-directed RNA polymerases I and III subunit RPAC2 OS=Mus musculus GN=Polr1d PE=2 SV=1	1	7.5	0	265350	250520	244970	83661	194790	101460	241920	209540	224140	215880	123300	100130	261600	122240	265160	228050
A0A087WNP5;E9Q1C9;L7N452;A2BFU4;K7N769;A2BFG8;Q08BU3;E9Q9G3;O88245;L7N2C1;L7N1Y9;F7AIG4;F6SU29;F6ZZH7;A2AHM2;A2ARV7;G3UY53;A2AW66;A2ARR6;A0A087WRJ1;J3QPX0;A2ARW3;J3QK55;A0A087WRH0;F6QN44;F6R9A8;Q6PEE4;Q3TPQ7;F8VPU8;A2AW67;Q6NVD6;A2ARR7;Q91VM8;Q8K0G9;L7N248;A2ART0;A0A087WPN2;L7N208;A2ARX0;A2ARW8;E9Q981;D3Z5L4;A2AQA0;A2BG91;Q8BZW4;P08043;Q6GQR8;Q6P560	A0A087WNP5;E9Q1C9;L7N452;A2BFU4;K7N769;A2BFG8;Q08BU3;E9Q9G3		Gm4767;Gm10323;Zfp640;Gm14403;2410141K09Rik;Etohi1;Gm14420;Zfp938	tr|A0A087WNP5|A0A087WNP5_MOUSE Protein Gm10778 OS=Mus musculus GN=Gm4767 PE=4 SV=1;tr|E9Q1C9|E9Q1C9_MOUSE Protein Gm10323 OS=Mus musculus GN=Gm10323 PE=4 SV=2;tr|L7N452|L7N452_MOUSE Protein Zfp640 OS=Mus musculus GN=Zfp640 PE=4 SV=1;tr|A2BFU4|A2BFU4_MOUSE	3	5.2	0	168730	135960	258830	198180	159920	204770	187370	179700	157600	133890	166240	204090	201260	171760	226940	216730
Q6PEE3	Q6PEE3	Ribonucleoside-diphosphate reductase subunit M2 B	Rrm2b	sp|Q6PEE3|RIR2B_MOUSE Ribonucleoside-diphosphate reductase subunit M2 B OS=Mus musculus GN=Rrm2b PE=1 SV=1	1	3.7	0	270080	248840	234870	91542	196440	109350	265560	229980	231110	218290	119700	79939	242960	125410	256840	220890
Q8BNI4	Q8BNI4	Derlin-2	Derl2	sp|Q8BNI4|DERL2_MOUSE Derlin-2 OS=Mus musculus GN=Derl2 PE=1 SV=2	1	12.6	0	176670	178900	244470	154680	163850	190090	212370	162900	160020	147270	170750	180670	209410	170010	231740	207340
B1ASA5	B1ASA5		Zfp362	tr|B1ASA5|B1ASA5_MOUSE Protein Zfp362 OS=Mus musculus GN=Zfp362 PE=2 SV=1	4	13.4	0	188010	305150	228230	171780	262290	127360	150930	157830	127940	137150	216200	134420	211400	158180	318510	165930
Q922R0	Q922R0	cAMP-dependent protein kinase catalytic subunit PRKX	Prkx	sp|Q922R0|PRKX_MOUSE cAMP-dependent protein kinase catalytic subunit PRKX OS=Mus musculus GN=Prkx PE=1 SV=1	5	18.6	0	225980	231370	259540	99419	164270	118020	258550	195190	214890	188100	137110	113720	224320	137030	263630	241990
Q8BH01	Q8BH01	Transmembrane and coiled-coil domain-containing protein 3	Tmco3	sp|Q8BH01|TMCO3_MOUSE Transmembrane and coiled-coil domain-containing protein 3 OS=Mus musculus GN=Tmco3 PE=2 SV=1	2	3.2	0	172510	170450	323500	142560	154050	147690	194030	188040	162760	158110	224460	166300	188380	171030	222620	216930
Q8K0C8	Q8K0C8	Cytochrome c oxidase assembly protein COX19	Cox19	sp|Q8K0C8|COX19_MOUSE Cytochrome c oxidase assembly protein COX19 OS=Mus musculus GN=Cox19 PE=3 SV=1	2	23.9	0	292640	190590	223050	131180	177180	119840	230610	175590	229050	202020	158020	148830	197410	113980	215210	231610
Q80SY6	Q80SY6	Adenosine deaminase-like protein	Adal	sp|Q80SY6|ADAL_MOUSE Adenosine deaminase-like protein OS=Mus musculus GN=Adal PE=2 SV=1	3	9.2	0	294870	293220	256880	76071	197240	70662	275860	242930	254930	247120	122780	83717	238940	103460	268530	258370
Q9DC37	Q9DC37	Major facilitator superfamily domain-containing protein 1	Mfsd1	sp|Q9DC37|MFSD1_MOUSE Major facilitator superfamily domain-containing protein 1 OS=Mus musculus GN=Mfsd1 PE=1 SV=1	2	5.8	0	236340	210640	207350	122070	182180	136490	218730	188410	224250	184900	150070	117110	217540	172520	229040	248780
Q8VDB2	Q8VDB2	Dol-P-Man:Man(7)GlcNAc(2)-PP-Dol alpha-1,6-mannosyltransferase	Alg12	sp|Q8VDB2|ALG12_MOUSE Dol-P-Man:Man(7)GlcNAc(2)-PP-Dol alpha-1,6-mannosyltransferase OS=Mus musculus GN=Alg12 PE=2 SV=2	1	2.3	0	196550	177290	226110	158460	176990	177150	206430	169530	168990	177410	168940	172840	198150	182960	226100	205960
Q08775	Q08775	Runt-related transcription factor 2	Runx2	sp|Q08775|RUNX2_MOUSE Runt-related transcription factor 2 OS=Mus musculus GN=Runx2 PE=1 SV=2	5	10.5	0	181140	159420	233090	170540	171070	196320	204330	186910	183320	160720	171850	142840	210840	199620	224180	201620
E2JF22	E2JF22	Piezo-type mechanosensitive ion channel component 1	Piezo1	sp|E2JF22|PIEZ1_MOUSE Piezo-type mechanosensitive ion channel component 1 OS=Mus musculus GN=Piezo1 PE=1 SV=1	6	4.8	0	214630	185100	257540	142390	155470	196440	229800	151660	182220	165100	156150	155830	203960	195670	221450	204920
Q64707	Q64707	U2 small nuclear ribonucleoprotein auxiliary factor 35 kDa subunit-related protein 1	Zrsr1	sp|Q64707|U2AFL_MOUSE U2 small nuclear ribonucleoprotein auxiliary factor 35 kDa subunit-related protein 1 OS=Mus musculus GN=Zrsr1 PE=2 SV=1	5	14.3	0	211160	185400	228950	157030	183220	167200	221140	184670	183540	169270	163690	164950	179610	172780	230920	199660
Q8BPS4	Q8BPS4	Integral membrane protein GPR180	Gpr180	sp|Q8BPS4|GP180_MOUSE Integral membrane protein GPR180 OS=Mus musculus GN=Gpr180 PE=2 SV=1	1	2.9	0	176080	148100	270750	187620	151740	181640	242660	167060	166780	145280	193120	170320	208840	199210	231650	189020
P59764	P59764	Dedicator of cytokinesis protein 4	Dock4	sp|P59764|DOCK4_MOUSE Dedicator of cytokinesis protein 4 OS=Mus musculus GN=Dock4 PE=1 SV=1	3	2	0	231270	177600	284800	153510	173340	110550	235750	194570	165650	177350	176050	152370	227340	152960	239080	209850
O88852	O88852	Testis-specific Y-encoded-like protein 1	Tspyl1	sp|O88852|TSYL1_MOUSE Testis-specific Y-encoded-like protein 1 OS=Mus musculus GN=Tspyl1 PE=2 SV=1	1	2.1	0	189740	175970	249790	144860	183420	202270	204830	163800	151950	137470	174880	175380	209590	205500	236450	228490
Q9JHJ8	Q9JHJ8	ICOS ligand	Icoslg	sp|Q9JHJ8|ICOSL_MOUSE ICOS ligand OS=Mus musculus GN=Icoslg PE=1 SV=1	2	6.5	0	216060	181510	251160	159430	168240	191180	197480	190580	223950	183080	157330	147790	168910	161420	225240	208420
Q9D771	Q9D771	Transmembrane protein 206	Tmem206	sp|Q9D771|TM206_MOUSE Transmembrane protein 206 OS=Mus musculus GN=Tmem206 PE=1 SV=1	3	13.7	0	151840	138770	249000	195670	158180	269420	201810	176980	147420	112260	178000	218050	182080	272670	218040	216010
A0A075B5J5	A0A075B5J5		Trbv31	tr|A0A075B5J5|A0A075B5J5_MOUSE Protein Trbv31 OS=Mus musculus GN=Trbv31 PE=4 SV=1	2	20.7	0	198470	201020	237000	150390	169140	179760	207460	163960	184260	165900	175100	180580	203430	180530	212270	213930
P70699	P70699	Lysosomal alpha-glucosidase	Gaa	sp|P70699|LYAG_MOUSE Lysosomal alpha-glucosidase OS=Mus musculus GN=Gaa PE=1 SV=2	3	5.2	0	257470	188660	214630	131410	187000	126020	227050	181530	210070	173680	154670	119840	194970	156160	234210	384650
Q9DC22	Q9DC22	DDB1- and CUL4-associated factor 6	Dcaf6	sp|Q9DC22|DCAF6_MOUSE DDB1- and CUL4-associated factor 6 OS=Mus musculus GN=Dcaf6 PE=2 SV=1	4	6.4	0	228490	207260	234610	111640	175620	151020	236510	182900	224650	195740	135980	125640	229790	165450	255710	241150
Q91YN9	Q91YN9	BAG family molecular chaperone regulator 2	Bag2	sp|Q91YN9|BAG2_MOUSE BAG family molecular chaperone regulator 2 OS=Mus musculus GN=Bag2 PE=1 SV=1	3	15.7	0	163360	138210	271180	189760	165100	272810	192500	151980	140120	133010	202710	213970	183810	288400	217070	179000
Q99MB1	Q99MB1	Toll-like receptor 3	Tlr3	sp|Q99MB1|TLR3_MOUSE Toll-like receptor 3 OS=Mus musculus GN=Tlr3 PE=1 SV=2	5	7	0	143740	138540	250680	246370	156500	310850	188560	147260	111550	129390	181040	246770	175070	287910	222310	214610
Q8BHN0	Q8BHN0	Protein phosphatase 1L	Ppm1l	sp|Q8BHN0|PPM1L_MOUSE Protein phosphatase 1L OS=Mus musculus GN=Ppm1l PE=1 SV=1	3	8.9	0	178120	179370	301150	171750	190390	189080	172140	171700	175540	142850	233580	151830	205330	204910	210560	190070
B1AWL2	B1AWL2		Zfp462	tr|B1AWL2|B1AWL2_MOUSE Protein Zfp462 OS=Mus musculus GN=Zfp462 PE=4 SV=1	1	0.5	0	202550	186850	279530	173610	154330	165700	208170	166430	153250	182610	174390	176630	218670	183890	213210	227910
O70477	O70477	Homeobox protein PKNOX1	Pknox1	sp|O70477|PKNX1_MOUSE Homeobox protein PKNOX1 OS=Mus musculus GN=Pknox1 PE=2 SV=3	2	9.2	0	210300	201350	277450	112160	206370	124810	266650	188920	247720	188970	144900	125500	223110	138160	272150	224590
A0A075B5R2	A0A075B5R2		Ighv7-3	tr|A0A075B5R2|A0A075B5R2_MOUSE Uncharacterized protein (Fragment) OS=Mus musculus GN=Ighv7-3 PE=4 SV=2	1	10.8	0	152020	179450	296610	132190	135850	195390	289170	209530	151580	137300	197380	131790	186800	212360	264740	281410
P55288	P55288	Cadherin-11	Cdh11	sp|P55288|CAD11_MOUSE Cadherin-11 OS=Mus musculus GN=Cdh11 PE=1 SV=1	3	5.8	0	165910	174710	288980	179560	182340	240870	188890	164830	199530	165180	192680	143920	205280	197470	203940	185870
O35083	O35083	1-acyl-sn-glycerol-3-phosphate acyltransferase alpha	Agpat1	sp|O35083|PLCA_MOUSE 1-acyl-sn-glycerol-3-phosphate acyltransferase alpha OS=Mus musculus GN=Agpat1 PE=2 SV=1	3	20.4	0	187440	188520	253310	189700	170940	183550	212470	175050	163310	165580	179050	188250	192980	195890	228690	195420
Q99LT0	Q99LT0	Protein dpy-30 homolog	Dpy30	sp|Q99LT0|DPY30_MOUSE Protein dpy-30 homolog OS=Mus musculus GN=Dpy30 PE=1 SV=1	1	9.1	0	286110	192660	331840	115140	213920	130990	224550	170000	175700	262870	210290	105430	251890	134030	222040	178530
Q99NB5	Q99NB5	Gasdermin-C	Gsdmc	sp|Q99NB5|GSDMC_MOUSE Gasdermin-C OS=Mus musculus GN=Gsdmc PE=2 SV=1	1	2.4	0	221540	215900	242150	140150	187040	163520	231800	189950	197200	199070	176260	136780	206240	138610	238880	229470
Q9JMD1	Q9JMD1	Scm-like with four MBT domains protein 1	Sfmbt1	sp|Q9JMD1|SMBT1_MOUSE Scm-like with four MBT domains protein 1 OS=Mus musculus GN=Sfmbt1 PE=1 SV=1	5	7.8	0	213240	200520	243370	149340	165440	152220	224600	201730	215370	183760	151440	143870	231290	177710	243130	215340
Q9CQX5	Q9CQX5	Claudin domain-containing protein 1	Cldnd1	sp|Q9CQX5|CLDN1_MOUSE Claudin domain-containing protein 1 OS=Mus musculus GN=Cldnd1 PE=1 SV=1	2	8.7	0	241680	183370	265820	136300	156100	175000	223680	187790	203140	179230	158300	140850	216300	179780	264680	218060
P31809	P31809	Carcinoembryonic antigen-related cell adhesion molecule 1	Ceacam1	sp|P31809|CEAM1_MOUSE Carcinoembryonic antigen-related cell adhesion molecule 1 OS=Mus musculus GN=Ceacam1 PE=1 SV=1	2	6.5	0	141350	144290	293970	182650	152960	344760	176480	151660	173180	138220	206020	186620	182020	311950	203120	212020
O08677;Q6S9I3	O08677;Q6S9I3	Kininogen-1;Kininogen-1 heavy chain;Bradykinin;Kininogen-1 light chain	Kng1;Kng2	sp|O08677|KNG1_MOUSE Kininogen-1 OS=Mus musculus GN=Kng1 PE=1 SV=1;tr|Q6S9I3|Q6S9I3_MOUSE HMW kininogen-II OS=Mus musculus GN=Kng2 PE=2 SV=1	2	2.7	0	139860	154790	210940	155260	174190	325130	201800	200720	165590	113690	163230	170720	217720	307140	249760	251850
Q8BGS2	Q8BGS2	BolA-like protein 2	Bola2	sp|Q8BGS2|BOLA2_MOUSE BolA-like protein 2 OS=Mus musculus GN=Bola2 PE=1 SV=1	2	32.6	0	419630	257400	270440	87284	192160	105090	238790	213630	238620	199600	110030	97487	358600	116190	273390	238460
Q3UJV1	Q3UJV1	Coiled-coil domain-containing protein 61	Ccdc61	sp|Q3UJV1|CCD61_MOUSE Coiled-coil domain-containing protein 61 OS=Mus musculus GN=Ccdc61 PE=2 SV=1	2	4.5	0	222590	213660	256160	145460	175490	153520	241680	199980	172710	174660	160750	153900	208160	186600	243540	224320
Q68ED7	Q68ED7	CREB-regulated transcription coactivator 1	Crtc1	sp|Q68ED7|CRTC1_MOUSE CREB-regulated transcription coactivator 1 OS=Mus musculus GN=Crtc1 PE=1 SV=1	3	10.8	0	234910	238280	257450	121480	220350	137720	251460	204010	207780	194850	165310	90010	237900	146740	266990	241720
E9PY43	E9PY43		Erich1	tr|E9PY43|E9PY43_MOUSE Protein Erich1 OS=Mus musculus GN=Erich1 PE=4 SV=1	3	10.5	0	265290	265390	234210	123440	188760	100330	261510	219310	229310	238520	153880	116490	233650	116800	247230	254270
Q8BWY7	Q8BWY7	Zinc transporter ZIP11	Slc39a11	sp|Q8BWY7|S39AB_MOUSE Zinc transporter ZIP11 OS=Mus musculus GN=Slc39a11 PE=2 SV=1	2	5.6	0	209250	196490	286400	173860	146610	174940	219790	158490	156810	167500	199180	199430	204670	185120	232450	221850
Q9CZH8	Q9CZH8	Coiled-coil domain-containing protein 77	Ccdc77	sp|Q9CZH8|CCD77_MOUSE Coiled-coil domain-containing protein 77 OS=Mus musculus GN=Ccdc77 PE=2 SV=1	3	6.7	0	192000	198980	233790	167380	178430	231150	213820	213440	176940	145860	164730	168670	217830	218500	196210	197930
E9PZQ1	E9PZQ1		Ddx60	tr|E9PZQ1|E9PZQ1_MOUSE Protein Ddx60 OS=Mus musculus GN=Ddx60 PE=4 SV=1	4	3.3	0	235170	213720	259250	133030	172200	130460	248960	173370	214040	201050	167850	125220	211970	174490	268800	248740
P13707	P13707	Glycerol-3-phosphate dehydrogenase [NAD(+)], cytoplasmic	Gpd1	sp|P13707|GPDA_MOUSE Glycerol-3-phosphate dehydrogenase [NAD(+)], cytoplasmic OS=Mus musculus GN=Gpd1 PE=1 SV=3	3	8.3	0	181640	152050	258530	200190	166550	228370	220830	173340	160240	123030	183910	213100	202470	220150	228850	229980
Q3US59;Q8R0S1	Q3US59;Q8R0S1	Cyclic AMP-dependent transcription factor ATF-7	Gm28047;Atf7	tr|Q3US59|Q3US59_MOUSE Protein Gm28047 OS=Mus musculus GN=Gm28047 PE=2 SV=1;sp|Q8R0S1|ATF7_MOUSE Cyclic AMP-dependent transcription factor ATF-7 OS=Mus musculus GN=Atf7 PE=2 SV=1	2	6.3	0	200080	210390	255510	158050	171660	183510	228510	190210	203460	163430	170840	166800	193190	168390	245360	215370
P20334	P20334	Tumor necrosis factor receptor superfamily member 9	Tnfrsf9	sp|P20334|TNR9_MOUSE Tumor necrosis factor receptor superfamily member 9 OS=Mus musculus GN=Tnfrsf9 PE=1 SV=1	3	18.8	0	219450	192400	269080	113290	186650	137170	262440	223640	192130	182660	153440	125720	228940	158450	299910	266380
Q9D8H7	Q9D8H7	Metalloendopeptidase OMA1, mitochondrial	Oma1	sp|Q9D8H7|OMA1_MOUSE Metalloendopeptidase OMA1, mitochondrial OS=Mus musculus GN=Oma1 PE=2 SV=1	4	6.7	0	209920	160700	264150	185300	166610	212550	195070	161060	214070	153500	189570	190590	186080	219030	225080	192900
Q8BMK5	Q8BMK5	Coiled-coil domain-containing protein 184	Ccdc184	sp|Q8BMK5|CC184_MOUSE Coiled-coil domain-containing protein 184 OS=Mus musculus GN=Ccdc184 PE=2 SV=1	1	3.7	0	215100	186930	265960	178500	198760	175870	199160	177820	185410	169000	187970	171590	214580	188810	215050	186350
Q8BGN5	Q8BGN5	NIPA-like protein 3	Nipal3	sp|Q8BGN5|NPAL3_MOUSE NIPA-like protein 3 OS=Mus musculus GN=Nipal3 PE=2 SV=1	1	2.2	0	188650	189090	244240	193590	185850	166220	217470	167190	207470	196560	182690	159200	222420	171980	206060	222110
P54751	P54751	CMP-N-acetylneuraminate-beta-galactosamide-alpha-2,3-sialyltransferase 1	St3gal1	sp|P54751|SIA4A_MOUSE CMP-N-acetylneuraminate-beta-galactosamide-alpha-2,3-sialyltransferase 1 OS=Mus musculus GN=St3gal1 PE=2 SV=1	2	9.5	0	180300	166310	307110	162670	144420	195240	203860	174030	165140	161620	317980	203240	188110	209690	194150	199610
Q8R2U4	Q8R2U4	N-terminal Xaa-Pro-Lys N-methyltransferase 1;N-terminal Xaa-Pro-Lys N-methyltransferase 1, N-terminally processed	Ntmt1	sp|Q8R2U4|NTM1A_MOUSE N-terminal Xaa-Pro-Lys N-methyltransferase 1 OS=Mus musculus GN=Ntmt1 PE=2 SV=3	3	15.7	0	235710	227790	247420	113010	187900	173570	267210	192930	201660	218780	145310	121590	204660	150890	262880	254220
A2AKB9	A2AKB9	DDB1- and CUL4-associated factor 10	Dcaf10	sp|A2AKB9|DCA10_MOUSE DDB1- and CUL4-associated factor 10 OS=Mus musculus GN=Dcaf10 PE=2 SV=1	3	6.2	0	236500	203320	239130	151430	198650	134250	245820	204060	207380	180670	156550	137240	231880	163230	253990	227730
Q5RKZ7	Q5RKZ7	Molybdenum cofactor biosynthesis protein 1;Cyclic pyranopterin monophosphate synthase;Cyclic pyranopterin monophosphate synthase accessory protein	Mocs1	sp|Q5RKZ7|MOCS1_MOUSE Molybdenum cofactor biosynthesis protein 1 OS=Mus musculus GN=Mocs1 PE=1 SV=2	4	9.3	0	189190	188000	241720	167110	182390	201300	199430	180500	233050	180230	182960	175490	205710	200940	214620	188250
P70338	P70338	Zinc finger protein Gfi-1	Gfi1	sp|P70338|GFI1_MOUSE Zinc finger protein Gfi-1 OS=Mus musculus GN=Gfi1 PE=1 SV=2	3	16.5	0	270580	282040	258660	85728	251860	75934	256570	245070	238110	287980	146990	94902	285540	94129	310590	266430
Q8BLV3	Q8BLV3	Sodium/hydrogen exchanger 7	Slc9a7	sp|Q8BLV3|SL9A7_MOUSE Sodium/hydrogen exchanger 7 OS=Mus musculus GN=Slc9a7 PE=2 SV=1	3	7.6	0	191280	173900	270890	161140	183900	197580	236880	191630	194460	165500	200920	194030	232230	117700	259640	206000
Q62036	Q62036	Centrosomal protein of 131 kDa	Cep131	sp|Q62036|CP131_MOUSE Centrosomal protein of 131 kDa OS=Mus musculus GN=Cep131 PE=1 SV=2	4	4	0	218790	196440	257310	165130	173850	173030	210880	194120	213460	176590	152090	145770	225340	208550	234240	213880
Q8VIK1	Q8VIK1	U11/U12 small nuclear ribonucleoprotein 25 kDa protein	Snrnp25	sp|Q8VIK1|SNR25_MOUSE U11/U12 small nuclear ribonucleoprotein 25 kDa protein OS=Mus musculus GN=Snrnp25 PE=1 SV=1	1	7.3	0	257330	223090	287330	119330	172950	153220	239460	192390	197450	221940	151290	115850	244230	152760	267690	240670
Q78J03	Q78J03	Methionine-R-sulfoxide reductase B2, mitochondrial	Msrb2	sp|Q78J03|MSRB2_MOUSE Methionine-R-sulfoxide reductase B2, mitochondrial OS=Mus musculus GN=Msrb2 PE=1 SV=1	1	5.1	0	230440	204360	296130	181720	170040	141680	222310	160220	183140	185900	198470	197300	218490	191150	201950	181930
Q7TNB8	Q7TNB8	Protein strawberry notch homolog 2	Sbno2	sp|Q7TNB8|SBNO2_MOUSE Protein strawberry notch homolog 2 OS=Mus musculus GN=Sbno2 PE=2 SV=1	10	8.6	0	232560	181620	244630	161020	171000	173480	220660	175040	213170	186640	167470	195890	217190	165120	234330	219660
Q9D2R8	Q9D2R8	28S ribosomal protein S33, mitochondrial	Mrps33	sp|Q9D2R8|RT33_MOUSE 28S ribosomal protein S33, mitochondrial OS=Mus musculus GN=Mrps33 PE=2 SV=1	1	11.3	0	200600	193130	258480	181500	179110	196670	195360	186580	174190	140650	209990	207680	214300	204110	215200	195720
Q9CQE2	Q9CQE2	Transmembrane protein 223	Tmem223	sp|Q9CQE2|TM223_MOUSE Transmembrane protein 223 OS=Mus musculus GN=Tmem223 PE=2 SV=1	1	5	0	210960	194310	250810	168150	158600	219360	205450	182780	182010	159770	199400	212350	197930	188530	226880	195940
P62484	P62484	Abl interactor 2	Abi2	sp|P62484|ABI2_MOUSE Abl interactor 2 OS=Mus musculus GN=Abi2 PE=2 SV=1	5	13.2	0	212060	212270	282300	135400	178680	164480	250600	197780	228060	192030	153160	139160	222170	178610	236400	217800
O88848	O88848	ADP-ribosylation factor-like protein 6	Arl6	sp|O88848|ARL6_MOUSE ADP-ribosylation factor-like protein 6 OS=Mus musculus GN=Arl6 PE=2 SV=1	3	24.7	0	212320	211480	247850	133360	185550	179360	242940	185320	183870	174230	160680	151440	221730	209640	265410	225650
Q8VIB3	Q8VIB3	Type 2 lactosamine alpha-2,3-sialyltransferase	St3gal6	sp|Q8VIB3|SIA10_MOUSE Type 2 lactosamine alpha-2,3-sialyltransferase OS=Mus musculus GN=St3gal6 PE=2 SV=3	3	14	0	165730	169950	308570	225240	135010	224240	200250	168950	172550	146330	185370	212210	183200	257330	233530	224560
Q9CQY6	Q9CQY6	Ubiquinol-cytochrome-c reductase complex assembly factor 2	Uqcc2	sp|Q9CQY6|UQCC2_MOUSE Ubiquinol-cytochrome-c reductase complex assembly factor 2 OS=Mus musculus GN=Uqcc2 PE=1 SV=1	3	36	0	211360	172800	259490	189300	184950	193790	198860	158140	160600	163420	200810	227260	205160	235720	224920	187440
E9PYF4	E9PYF4		Lmo7	tr|E9PYF4|E9PYF4_MOUSE Protein Lmo7 OS=Mus musculus GN=Lmo7 PE=1 SV=1	2	1.2	0	229390	187790	274420	156780	160210	181570	220160	191770	182990	180190	197390	155020	227740	180760	251930	214850
Q8K094	Q8K094		Pvr	tr|Q8K094|Q8K094_MOUSE Nectin-2 OS=Mus musculus GN=Pvr PE=1 SV=1	2	9.8	0	206990	241710	278550	124810	202580	141210	250760	201550	223070	193780	160760	134010	214940	177390	259450	223100
Q9JJK5	Q9JJK5	Homocysteine-responsive endoplasmic reticulum-resident ubiquitin-like domain member 1 protein	Herpud1	sp|Q9JJK5|HERP1_MOUSE Homocysteine-responsive endoplasmic reticulum-resident ubiquitin-like domain member 1 protein OS=Mus musculus GN=Herpud1 PE=2 SV=1	2	6.9	0	190960	198440	258810	159990	159400	228430	236760	186980	168840	146310	172430	203350	189630	226380	244520	231650
Q9D7V1	Q9D7V1	SH2 domain-containing protein 4A	Sh2d4a	sp|Q9D7V1|SH24A_MOUSE SH2 domain-containing protein 4A OS=Mus musculus GN=Sh2d4a PE=1 SV=1	4	11.6	0	146450	143190	235700	223360	166440	307850	194590	163680	172870	139990	186270	230290	186470	338680	198020	230810
Q8BG87	Q8BG87	Methylcytosine dioxygenase TET3	Tet3	sp|Q8BG87|TET3_MOUSE Methylcytosine dioxygenase TET3 OS=Mus musculus GN=Tet3 PE=1 SV=3	2	2	0	184960	154900	291240	204380	171560	210190	202150	143240	170130	175770	195970	227680	219110	236560	208470	212640
Q04211	Q04211	Protein BTG2	Btg2	sp|Q04211|BTG2_MOUSE Protein BTG2 OS=Mus musculus GN=Btg2 PE=1 SV=1	2	23.4	0	276770	243280	271040	105140	204850	115530	259090	235900	266020	248410	138820	103440	226160	132230	297330	240970
Q91Z31	Q91Z31	Polypyrimidine tract-binding protein 2	Ptbp2	sp|Q91Z31|PTBP2_MOUSE Polypyrimidine tract-binding protein 2 OS=Mus musculus GN=Ptbp2 PE=1 SV=2	3	7.2	0	295610	312950	285770	98570	177770	142440	255280	222240	234200	224550	133260	87543	226770	155090	293480	239090
Q8BK06	Q8BK06	F-box only protein 9	Fbxo9	sp|Q8BK06|FBX9_MOUSE F-box only protein 9 OS=Mus musculus GN=Fbxo9 PE=1 SV=1	2	9.2	0	225630	199240	281990	154530	168030	145110	221600	172370	208980	218070	168490	165180	226660	189880	251960	227220
Q78IQ7	Q78IQ7	Zinc transporter ZIP4	Slc39a4	sp|Q78IQ7|S39A4_MOUSE Zinc transporter ZIP4 OS=Mus musculus GN=Slc39a4 PE=1 SV=1	2	4.4	0	233290	212820	249650	129130	184280	147140	243790	199200	210140	184610	185510	152610	244500	191640	229010	231430
Q80Z60	Q80Z60	Endothelin-converting enzyme 2;Methyltransferase-like region;Endothelin-converting enzyme 2 region	Ece2	sp|Q80Z60|ECE2_MOUSE Endothelin-converting enzyme 2 OS=Mus musculus GN=Ece2 PE=2 SV=2	3	4	0	282980	245000	249310	112650	220440	126050	266730	216960	249980	228610	126530	95035	277640	139970	276150	250500
Q9CW79	Q9CW79	Golgin subfamily A member 1	Golga1	sp|Q9CW79|GOGA1_MOUSE Golgin subfamily A member 1 OS=Mus musculus GN=Golga1 PE=1 SV=2	2	4.6	0	254520	251030	260890	105380	191410	152440	237390	197550	232270	207140	154200	109290	234290	170300	298620	250420
Q9JJG0	Q9JJG0	Transforming acidic coiled-coil-containing protein 2	Tacc2	sp|Q9JJG0|TACC2_MOUSE Transforming acidic coiled-coil-containing protein 2 OS=Mus musculus GN=Tacc2 PE=1 SV=2	4	3.7	0	251700	212730	241750	119340	190400	121770	269580	247550	211990	218140	160900	122710	227200	175140	272160	247900
Q8K3D3	Q8K3D3	DNA repair protein SWI5 homolog	Swi5	sp|Q8K3D3|SWI5_MOUSE DNA repair protein SWI5 homolog OS=Mus musculus GN=Swi5 PE=1 SV=1	2	25.8	0	263350	225850	267870	108750	176360	161170	276280	220310	217250	257830	150600	111190	261390	138540	265670	224020
L7N259;L7N1X9	L7N259;L7N1X9		Dcpp3;Dcpp1	tr|L7N259|L7N259_MOUSE Protein Dcpp3 OS=Mus musculus GN=Dcpp3 PE=4 SV=1;tr|L7N1X9|L7N1X9_MOUSE Protein Dcpp1 OS=Mus musculus GN=Dcpp1 PE=4 SV=1	4	38.2	0	146300	100200	2555500	128610	120470	191660	158310	134040	137800	74995	3219200	116810	150940	106440	198840	210460
Q3TV65	Q3TV65	MPN domain-containing protein	Mpnd	sp|Q3TV65|MPND_MOUSE MPN domain-containing protein OS=Mus musculus GN=Mpnd PE=2 SV=2	2	4.5	0	240700	209890	277030	158170	167540	165290	246190	172340	241440	169090	171900	172060	224000	165400	242100	220320
A2AA28	A2AA28	Methyltransferase-like protein 23	Mettl23	sp|A2AA28|MET23_MOUSE Methyltransferase-like protein 23 OS=Mus musculus GN=Mettl23 PE=2 SV=1	4	27.3	0	249460	220340	284970	114880	195970	131260	272480	224200	231350	200900	175390	118400	232040	147230	271550	247150
Q3TV70	Q3TV70	Nuclear receptor 2C2-associated protein	Nr2c2ap	sp|Q3TV70|NR2CA_MOUSE Nuclear receptor 2C2-associated protein OS=Mus musculus GN=Nr2c2ap PE=2 SV=1	2	17.1	0	325330	272320	264040	104110	197750	101170	294200	253410	259970	217350	131520	103200	262970	118460	296150	243630
Q99LL3	Q99LL3	Carbohydrate sulfotransferase 12	Chst12	sp|Q99LL3|CHSTC_MOUSE Carbohydrate sulfotransferase 12 OS=Mus musculus GN=Chst12 PE=2 SV=2	2	6.4	0	210750	185140	265980	172580	175230	212330	219220	175660	207710	171950	175280	191680	229320	207470	216580	203050
P47741	P47741	Tumor necrosis factor receptor superfamily member 4	Tnfrsf4	sp|P47741|TNR4_MOUSE Tumor necrosis factor receptor superfamily member 4 OS=Mus musculus GN=Tnfrsf4 PE=1 SV=1	1	5.1	0	203040	195500	250310	151680	197610	129390	271820	215060	228990	202690	162660	174350	225170	158980	259320	246060
Q9CV28	Q9CV28	Protein FAM188A	Fam188a	sp|Q9CV28|F188A_MOUSE Protein FAM188A OS=Mus musculus GN=Fam188a PE=1 SV=2	4	9.5	0	255380	258290	249140	116900	198580	134180	278550	227240	252450	247780	153680	102270	227890	147490	266610	242040
Q9JKJ9	Q9JKJ9	24-hydroxycholesterol 7-alpha-hydroxylase	Cyp39a1	sp|Q9JKJ9|CP39A_MOUSE 24-hydroxycholesterol 7-alpha-hydroxylase OS=Mus musculus GN=Cyp39a1 PE=2 SV=1	4	10.6	0	168150	143380	262840	268790	171530	334820	183790	152080	138410	121620	275560	320150	181470	280940	189480	177850
Q8C170	Q8C170	Unconventional myosin-IXa	Myo9a	sp|Q8C170|MYO9A_MOUSE Unconventional myosin-IXa OS=Mus musculus GN=Myo9a PE=2 SV=2	5	2.2	0	205830	163210	240390	145430	183790	252310	252840	206190	192990	182790	159980	172350	192210	234740	230510	243590
A2AIG8	A2AIG8	1-aminocyclopropane-1-carboxylate synthase-like protein 1	Accs	sp|A2AIG8|1A1L1_MOUSE 1-aminocyclopropane-1-carboxylate synthase-like protein 1 OS=Mus musculus GN=Accs PE=2 SV=1	4	13.9	0	250360	255740	244340	127170	199640	119280	273220	235390	242840	185670	173410	119520	221260	149240	291160	256560
P09581	P09581	Macrophage colony-stimulating factor 1 receptor	Csf1r	sp|P09581|CSF1R_MOUSE Macrophage colony-stimulating factor 1 receptor OS=Mus musculus GN=Csf1r PE=1 SV=3	4	7.6	0	149030	152510	241260	200250	163390	289660	271110	234240	154310	95281	199300	238160	182900	287860	242540	241570
Q00623	Q00623	Apolipoprotein A-I;Proapolipoprotein A-I;Truncated apolipoprotein A-I	Apoa1	sp|Q00623|APOA1_MOUSE Apolipoprotein A-I OS=Mus musculus GN=Apoa1 PE=1 SV=2	3	12.1	0	144930	135600	207580	180940	207800	563710	259780	191220	91646	102100	156250	206120	200990	441740	252980	244770
P63011	P63011	Ras-related protein Rab-3A	Rab3a	sp|P63011|RAB3A_MOUSE Ras-related protein Rab-3A OS=Mus musculus GN=Rab3a PE=1 SV=1	4	24.5	0	189030	178970	294760	154930	167230	221930	242740	181350	195360	173550	216880	165340	208490	218690	241900	210470
Q99KN1	Q99KN1	Arrestin domain-containing protein 1	Arrdc1	sp|Q99KN1|ARRD1_MOUSE Arrestin domain-containing protein 1 OS=Mus musculus GN=Arrdc1 PE=2 SV=2	3	16.8	0	244640	226500	268710	135010	231340	141250	226580	219270	233940	207190	150230	117220	251420	164960	271210	230150
Q9D0K0	Q9D0K0	TBC1 domain family member 7	Tbc1d7	sp|Q9D0K0|TBCD7_MOUSE TBC1 domain family member 7 OS=Mus musculus GN=Tbc1d7 PE=1 SV=1	2	7.8	0	260660	234250	261710	122060	182010	149900	258540	219840	226510	209520	147310	130920	228570	163810	297610	236660
Q6PGA0	Q6PGA0	REST corepressor 3	Rcor3	sp|Q6PGA0|RCOR3_MOUSE REST corepressor 3 OS=Mus musculus GN=Rcor3 PE=2 SV=2	7	21.3	0	232430	210150	255830	138280	206760	174410	249800	203990	224620	200260	154880	134470	245440	150330	267830	249850
Q64191	Q64191	N(4)-(beta-N-acetylglucosaminyl)-L-asparaginase;Glycosylasparaginase alpha chain;Glycosylasparaginase beta chain	Aga	sp|Q64191|ASPG_MOUSE N(4)-(beta-N-acetylglucosaminyl)-L-asparaginase OS=Mus musculus GN=Aga PE=2 SV=1	3	15.6	0	115530	363210	324990	248290	149490	204690	381120	284960	164760	102980	160040	167540	134290	191510	244610	231840
Q6PCQ0	Q6PCQ0	IQ domain-containing protein E	Iqce	sp|Q6PCQ0|IQCE_MOUSE IQ domain-containing protein E OS=Mus musculus GN=Iqce PE=2 SV=1	3	5.1	0	255620	216870	274540	122080	214310	142360	273770	216950	232950	214430	165130	122950	194070	157410	273070	264230
[truncated: 6,405 more rows]

## Sheet: Analysis
Protein IDs	Majority protein IDs	Protein names	Gene names	Fasta headers	Peptides	Sequence coverage [%]	WT_1	WT_2	WT_3	WT_4	PEP_1	PEP_2	PEP_3	PEP_4	WT_BOS_1	WT_BOS_2	WT_BOS_3	WT_BOS_4	PEP_BSO_1	PEP_BSO_2	PEP_BSO_3	PEP_BSO_4	WT_1	WT_2	WT_3	WT_4	PEP_1	PEP_2	PEP_3	PEP_4	WT_BOS_1	WT_BOS_2	WT_BOS_3	WT_BOS_4	PEP_BSO_1	PEP_BSO_2	PEP_BSO_3	PEP_BSO_4	Pep_1 ratio	Pep_2 ratio	Pep_3 ratio	Pep_4 ratio	PEP_BSO_1 ratio	PEP_BSO_2 ratio	PEP_BSO_3 ratio	PEP_BSO_4 ratio	Pep AVG ratio	P	Pep_BSO AVG ratio
[truncated: 7,223 more rows]
[truncated: 5 more columns]
